# Supplementary material for: Trienamine catalysis for asymmetric Diels–Alder reactions of 2,4-dienones: a theoretical investigation
Source: Royal Society of Chemistry journal article supplement (doi:10.1039/c5ob00797f), 2015-01-01
Supplement: c5ob00797f1.pdf [file c5ob00797f1.pdf]

## Trienamine Catalysis for Asymmetric Diels-Alder Reactions of 2,4-Dienones: A Theoretical Investigation

Zhishan Su and Chan Kyung Kim\*

Department of Chemistry and Chemical Engineering and Center for Design and Applications of Molecular Catalysts, Inha University, 100 Inha-ro, Incheon, 402-751, Korea

### Supporting Information

|                                                                                                                                                                                                                                                |           |
|------------------------------------------------------------------------------------------------------------------------------------------------------------------------------------------------------------------------------------------------|-----------|
| <b>Table S1.</b> Activation energies and their energy components in the Diels-Alder reactions in the absence of a catalyst (in kcal mol <sup>-1</sup> ).....                                                                                   | <b>S2</b> |
| <b>Table S2.</b> Activation energies and their energy components (kcal mol <sup>-1</sup> ) in the Diels-Alder reaction by trienamine catalysis.....                                                                                            | <b>S2</b> |
| <b>Table S3.</b> Experimental and calculated enantiomeric transition state energy differences, $\Delta G^{\text{TS}}$ (kcal mol <sup>-1</sup> ), in the Diels-Alder reaction by trienamine catalysis .....                                     | <b>S2</b> |
| <b>Figure S1.</b> Orbital interaction diagrams for transition states. (a) <b>2-B-TS-1a</b> and (b) <b>2-B-TS-1b</b> .....                                                                                                                      | <b>S3</b> |
| <b>Figure S2.</b> Optimized geometries of transition state <b>1-TS</b> in the isomerization reaction between <b>R1a</b> and <b>R1a-1</b> by C2-C3 single bond rotation.....                                                                    | <b>S4</b> |
| <b>Figure S3.</b> Energy profiles for isomerization of trienamine intermediates in the absence of acidic additives and in the presence of water, acidic additives - trifluoroacetic acid ( <b>TFA</b> ) or salicylic acid ( <b>SA</b> ).....   | <b>S4</b> |
| <b>Figure S4.</b> Optimized geometries of transition state <b>T-SA-TS-1</b> in the isomerization reaction from all <i>trans</i> -conformation to 3-17- <i>s-cis</i> -conformer by rotation of C2-C3 single bond.....                           | <b>S4</b> |
| <b>Figure S5.</b> Optimized geometries for <b>SA-CH<sub>3</sub>-TSA</b> and <b>SA-CH<sub>3</sub>-TSB</b> and their relative energies (kcal mol <sup>-1</sup> ).....                                                                            | <b>S5</b> |
| <b>Figure S6.</b> Optimized geometries for the transition states in <b>paths 5~8</b> and their relative Gibbs free energies at 333 K in kcal mol <sup>-1</sup> . .....                                                                         | <b>S5</b> |
| <b>Figure S7.</b> Energy profiles for stereoselective Diels-Alder reaction of <i>N</i> -phenylmaleimide ( <b>R2</b> ) along eight lower energy pathways by trienamine catalysis at 333 K.....                                                  | <b>S6</b> |
| <b>Figure S9.</b> Energy profiles for stereoselective Diels-Alder reaction of benzylidenecyanoacetate ( <b>R3</b> ) along four lower energies pathways by trienamine catalysis at 353 K.....                                                   | <b>S6</b> |
| <b>Figure S9.</b> Evolution of charge in the formation of the C-C bond in Diels-Alder cycloaddition of dienophile <i>N</i> -phenylmaleimide ( <b>R2</b> ) and benzylidenecyanoacetate ( <b>R3</b> ) by trienamine catalysis, respectively..... | <b>S7</b> |
| <b>Figure S10.</b> Orbital interaction diagrams for <b>2-1-TS-endo</b> and <b>3-1-TS1-endo</b> . (a) <b>2-1-TS-endo</b> from trienamine and <b>R2</b> fragments. (b) <b>3-1-TS1-endo</b> from trienamine and <b>R3</b> fragments. ....         | <b>S8</b> |
| <b>Cartesian coordinates of all the stationary points</b> .....                                                                                                                                                                                | <b>S9</b> |

**Table S1.** Activation energies and their energy components in the Diels-Alder reactions in the absence of a catalyst (in kcal mol<sup>-1</sup>).

| Pathway          | Reaction                          | $\Delta E_{\text{int}}$ | $\Delta E_{\text{a}}$ |                         |                  | $\Delta E^{\ddagger \text{d}}$ | $\Delta G^{\ddagger \text{e}}$ |
|------------------|-----------------------------------|-------------------------|-----------------------|-------------------------|------------------|--------------------------------|--------------------------------|
|                  |                                   |                         | Diene <sup>a</sup>    | Dienophile <sup>b</sup> | Sum <sup>c</sup> |                                |                                |
| <b>2-B</b>       | <b>R1a+R2</b> → <b>2-B-TS-1a</b>  | -13.4                   | 30.0                  | 13.2                    | 39.2             | 25.8                           | 32.4                           |
|                  | <b>R1b+R2</b> → <b>2-B-TS-1b</b>  | -12.4                   | 19.4                  | 11.6                    | 31.0             | 18.6                           | 26.0                           |
| <b>3-B-Path1</b> | <b>R1a+R3</b> → <b>3-B-TS-1a</b>  | -14.7                   | 28.4                  | 28.6                    | 57.0             | 42.3                           | 45.6                           |
|                  | <b>R1b+R3</b> → <b>3-B-TS-1b</b>  | -14.9                   | 24.0                  | 23.2                    | 47.2             | 32.3                           | 36.7                           |
| <b>3-B-Path2</b> | <b>R1a+R3</b> → <b>3-B-TS-1a'</b> | -21.4                   | 26.2                  | 26.5                    | 52.7             | 31.3                           | 36.5                           |
|                  | <b>R1b+R3</b> → <b>3-B-TS-1b'</b> | -14.6                   | 20.6                  | 21.0                    | 41.6             | 27.0                           | 30.1                           |

<sup>a</sup>Deformation energy of the 2,4-dienone fragment (**R1a** or **R1b**). <sup>b</sup>Deformation energy of dienophile fragment (**R2** or **R3**). <sup>c</sup>Total deformation energy. <sup>d</sup>Activation energy in the gas phase. <sup>e</sup>Activation free energy in a toluene solvent at 298 K.

**Table S2.** Activation energies and their energy components (kcal mol<sup>-1</sup>) in the Diels-Alder reaction by trienamine catalysis.

| Path     | Reactions                                | $\Delta E_{\text{int}}$ | $\Delta E_{\text{a}}$   |                                       |                  | $\Delta E^{\ddagger \text{d}}$ | $\Delta G^{\ddagger \text{e}}$ |
|----------|------------------------------------------|-------------------------|-------------------------|---------------------------------------|------------------|--------------------------------|--------------------------------|
|          |                                          |                         | Trienamine <sup>a</sup> | Dienophile ( <b>R2</b> ) <sup>b</sup> | Sum <sup>c</sup> |                                |                                |
| <b>1</b> | <b>2-1-COM-endo</b> → <b>2-1-TS-endo</b> | -14.5                   | 9.5                     | 16.0                                  | 25.4             | 10.9                           | 12.1                           |
| <b>2</b> | <b>2-2-COM-exo</b> → <b>2-2-TS-exo</b>   | -10.5                   | 9.0                     | 15.2                                  | 24.1             | 14.0                           | 14.0                           |
| <b>3</b> | <b>2-3-COM-endo</b> → <b>2-3-TS-endo</b> | -11.2                   | 9.4                     | 14.3                                  | 23.6             | 12.4                           | 15.0                           |
| <b>4</b> | <b>2-4-COM-exo</b> → <b>2-4-TS-exo</b>   | -15.0                   | 10.7                    | 21.8                                  | 32.5             | 19.1                           | 18.1                           |

<sup>a</sup>Deformation energy of trienamine fragment. <sup>b</sup>Deformation energies of dienophile (**R2**). <sup>c</sup>Total deformation energy. <sup>d</sup>Activation energy in the gas phase. <sup>e</sup>Activation free energy in a toluene solvent at 333 K.

**Table S3.** Experimental and calculated enantiomeric transition state energy differences,  $\Delta G^{\text{TS}}$  (kcal mol<sup>-1</sup>), in the Diels-Alder reaction by trienamine catalysis.

| Reactant  | Selectivity          | T(K) | $\Delta G^{\text{TS}}$ (exp.) | $\Delta G^{\text{TS}}$ (calc.) |
|-----------|----------------------|------|-------------------------------|--------------------------------|
| <b>R2</b> | 92 ~ 94 <sup>a</sup> | 333  | 2.1~2.3                       | 2.9                            |
|           | > 90 <sup>b</sup>    | 333  | > 2.0                         | 1.9                            |
| <b>R3</b> | 90% <sup>a</sup>     | 353  | 2.1                           | 5.1                            |
|           | > 90% <sup>b</sup>   | 353  | > 2.1                         | 0.3                            |

<sup>a</sup>Enantiomeric excess %. <sup>b</sup>Diastereomeric ratio %.

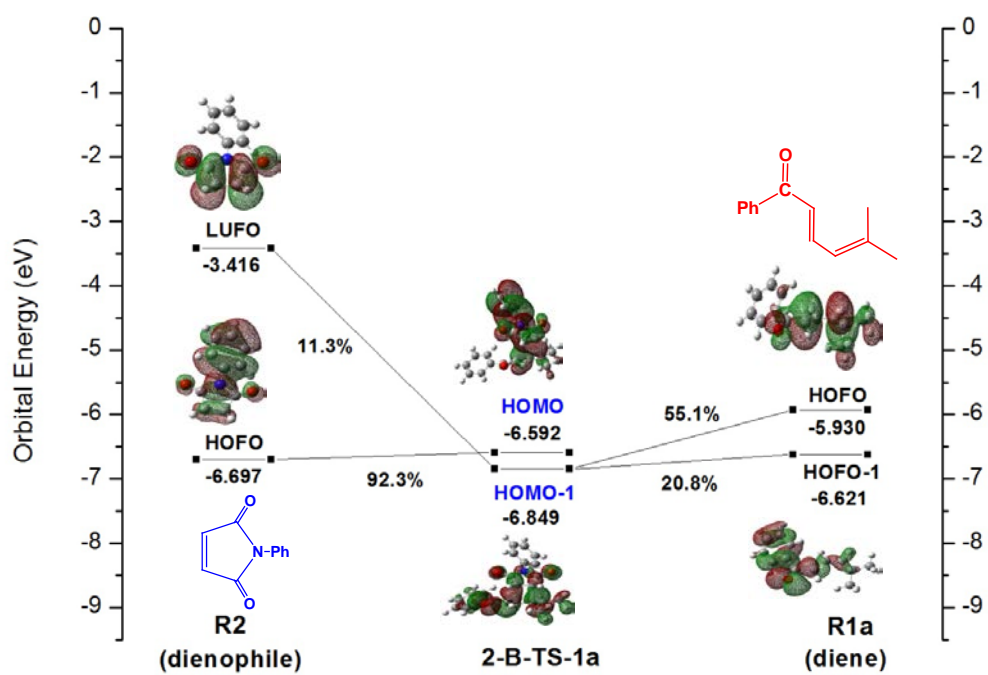

(a)

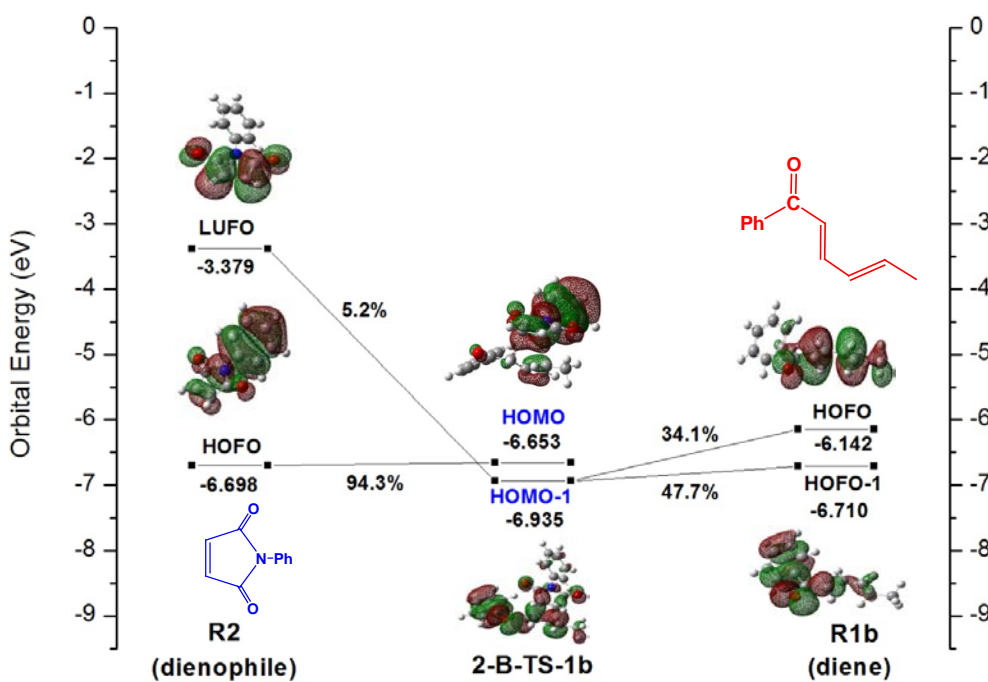

(b)

**Figure S1.** Orbital interaction diagrams for transition states. (a) **2-B-TS-1a** and (b) **2-B-TS-1b**.

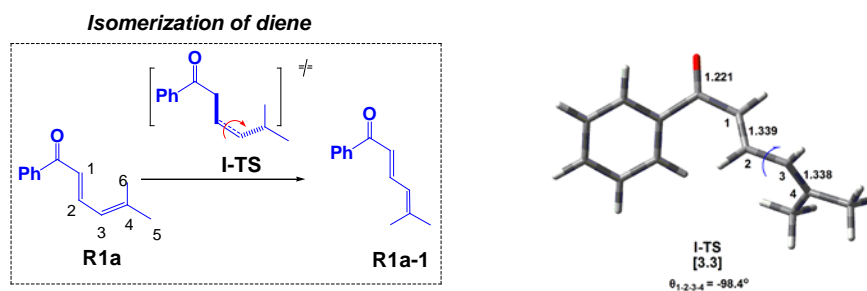

**Figure S2.** Optimized geometries of transition state **I-TS** in the isomerization reaction between **R1a** and **R1a-1** by C2-C3 single bond rotation. Activation free energies at 298 K ( $\Delta G^\ddagger$ , kcal mol<sup>-1</sup>) are given in brackets.

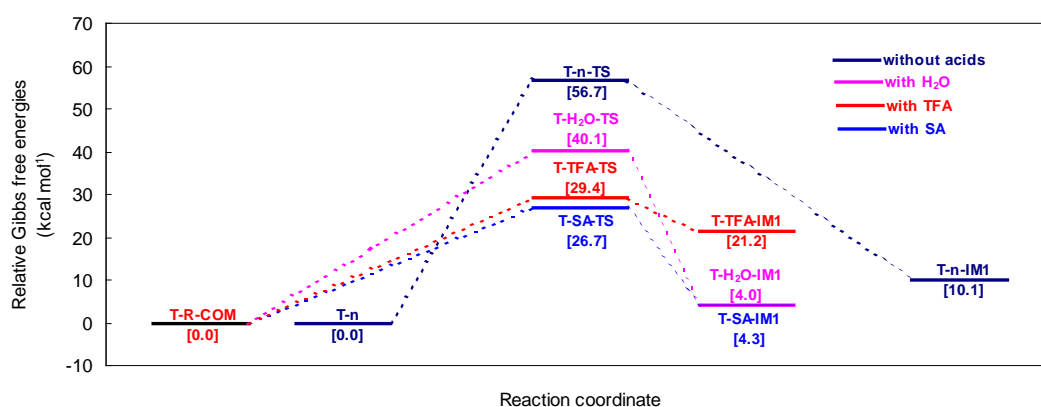

**Figure S3.** Gibbs energy profiles at 298 K for isomerization of trienamine intermediates in the absence of acidic additives and in the presence of water, acidic additives - trifluoroacetic acid (**TFA**) or salicylic acid (**SA**). Activation free energies ( $\Delta G^\ddagger$ , kcal mol<sup>-1</sup>) are given in brackets.

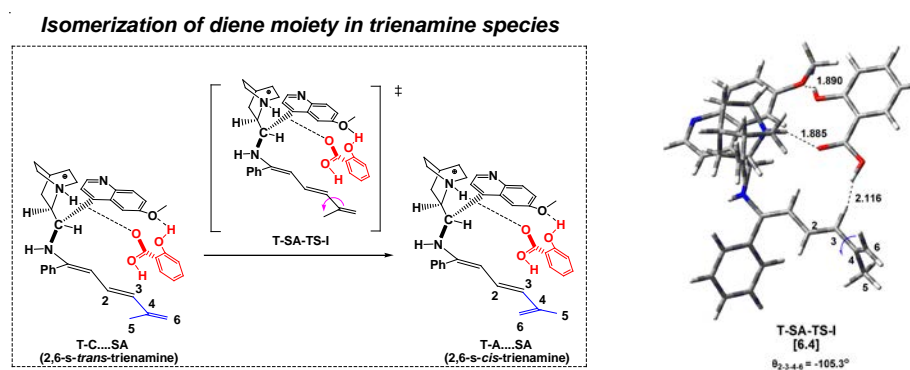

**Figure S4.** Optimized geometries of transition state **T-SA-TS-I** in the isomerization reaction from all *trans*-conformer to 2,6-*s-cis*-conformer by rotation of C3-C4 single bond. Activation free energies at 298 K ( $\Delta G^\ddagger$ , kcal mol<sup>-1</sup>) are given in brackets.

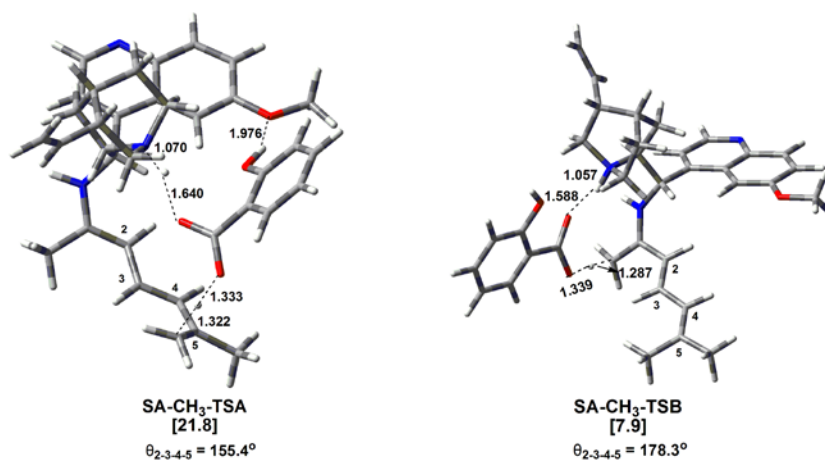

**Figure S5.** Optimized geometries for SA-CH<sub>3</sub>-TSA and SA-CH<sub>3</sub>-TSB and their relative energies (kcal mol<sup>-1</sup>). Activation free energies at 298 K ( $\Delta G^\ddagger$ , kcal mol<sup>-1</sup>) are given in brackets.

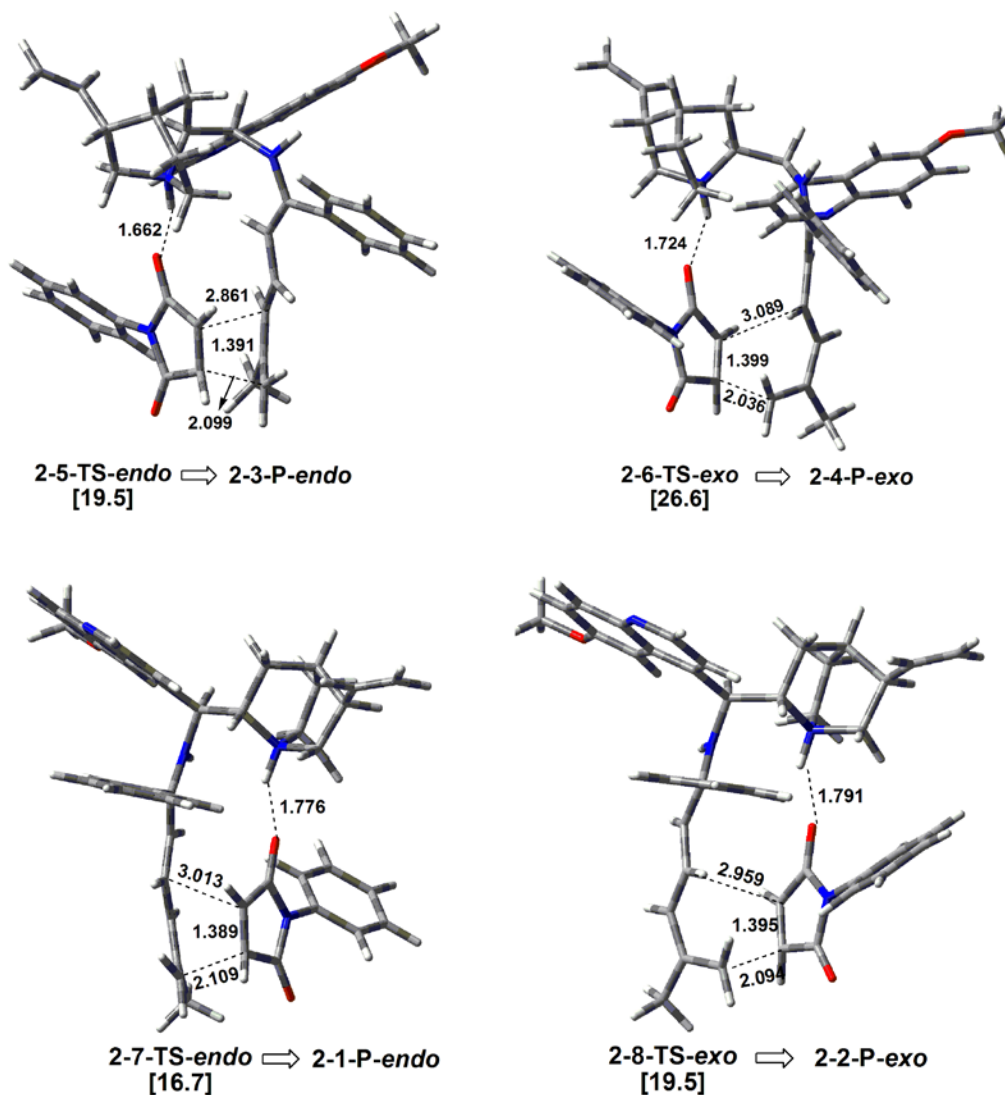

**Figure S6.** Optimized geometries for the transition states in paths 5~8 and their relative Gibbs free energies at 333 K in kcal mol<sup>-1</sup>.

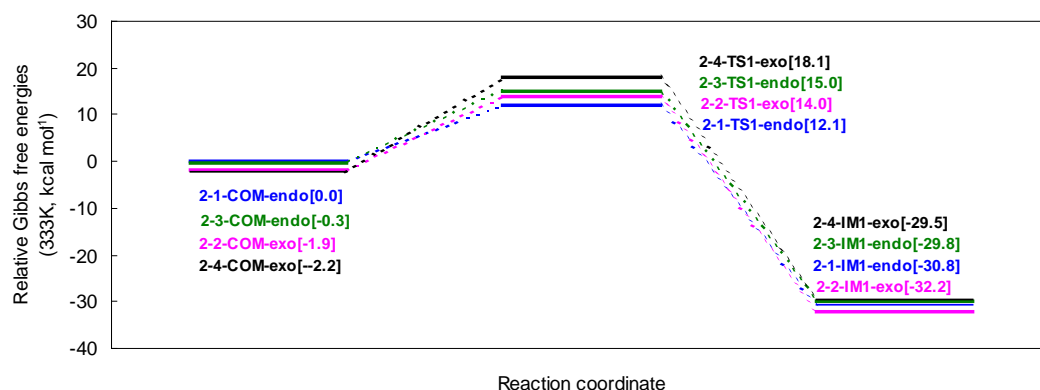

(a)

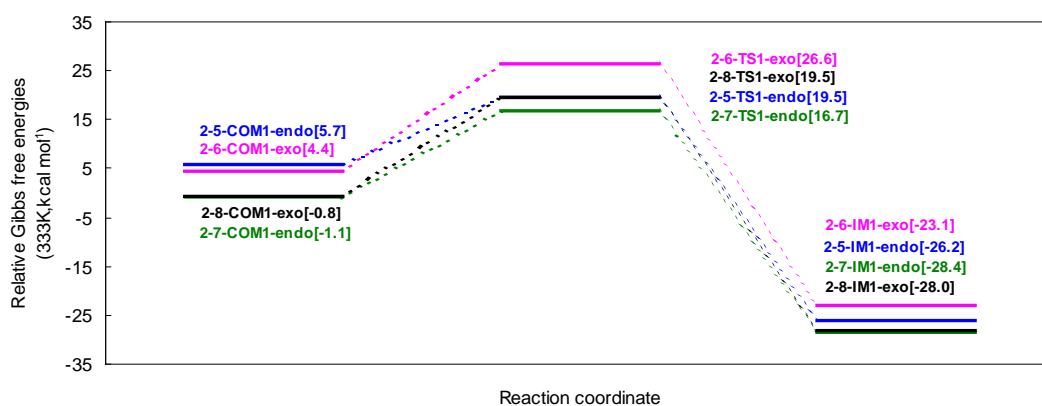

(b)

**Figure S7.** Energy profiles for stereoselective Diels-Alder reaction of *N*-phenylmaleimide (**R2**) along eight lower energy pathways by trienamine catalysis at 333 K. Calculated at the M06-2X/6-311++G\*\*(SMD,toluene) level. (a) Paths 1-4; (b) Paths 5-8.

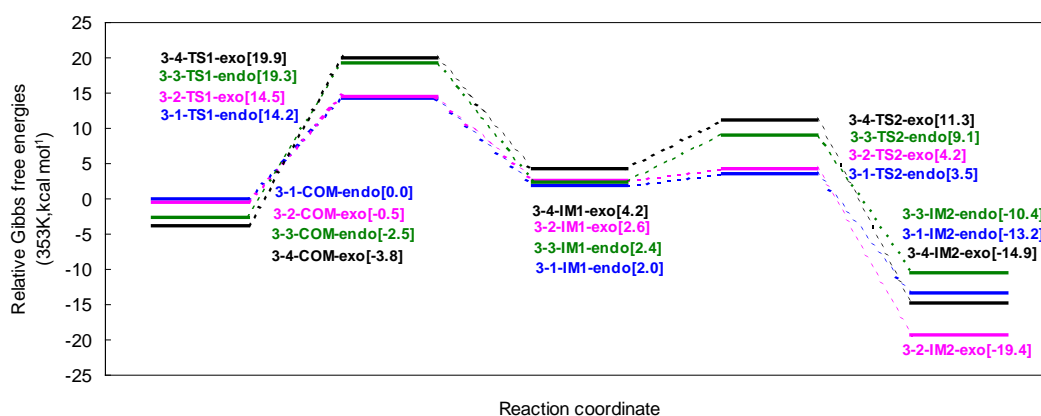

**Figure S8.** Energy profiles for stereoselective Diels-Alder reaction of benzylidenecyanoacetate (**R3**) along four lower energies pathways by trienamine catalysis at 353 K. Calculated at the M06-2X/6-311++G\*\*(SMD,toluene) level.

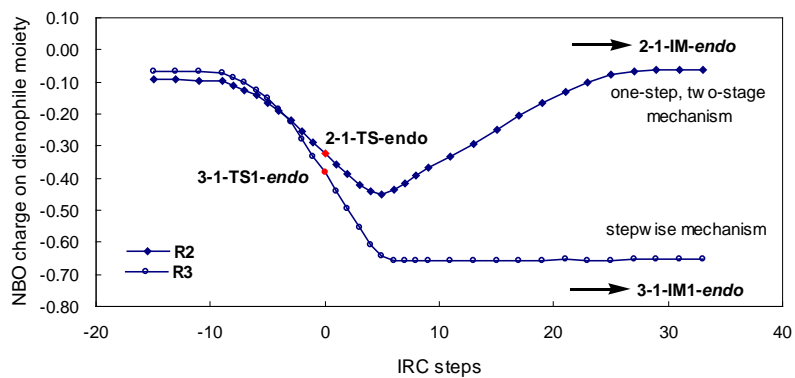

(a)

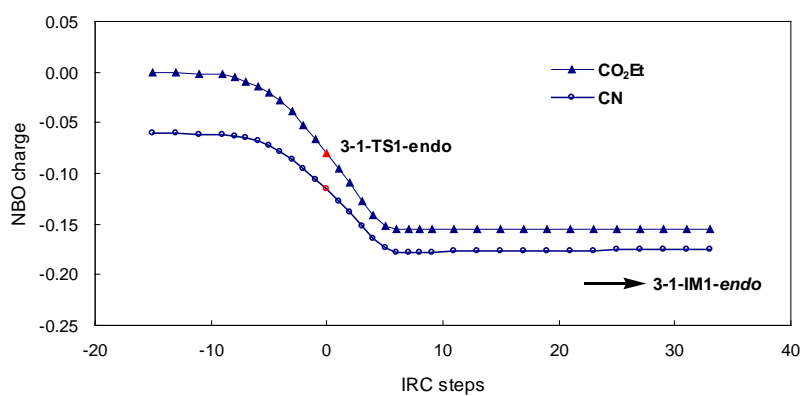

(b)

**Figure S9.** Evolution of charge in the formation of the C-C bond in Diels-Alder cycloaddition of dienophile *N*-phenylmaleimide (**R2**) and benzylidenecyanoacetate (**R3**) by trienamine catalysis. (a) The evolution of the charge populations for the dienophile moiety. (b) The evolution of NBO charge accumulated on -CO<sub>2</sub>Et and -CN substituent in dienophile **R3**.

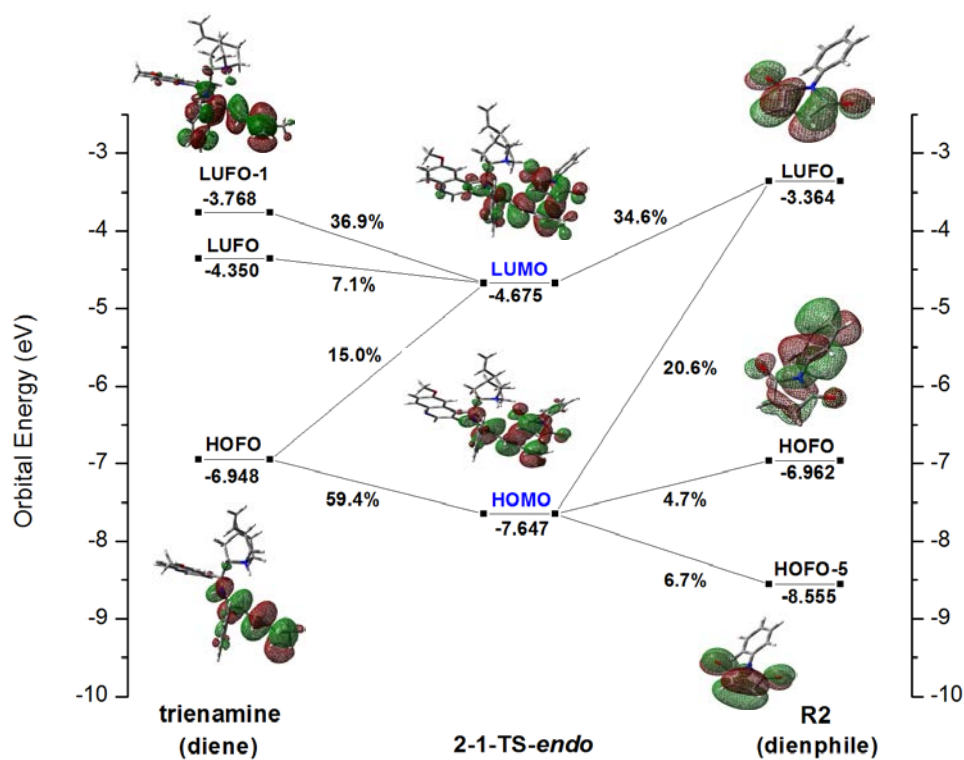

(a)

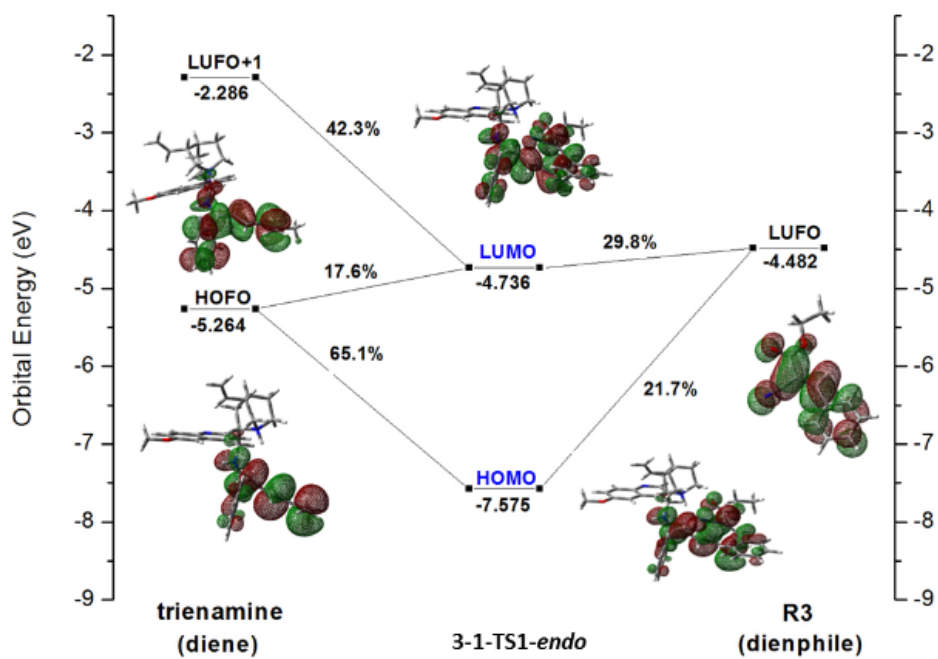

(b)

**Figure S10.** Orbital interaction diagrams for **2-1-TS-endo** and **3-1-TS1-endo**. (a) **2-1-TS-endo** from trienamine and **R2** fragments. (b) **3-1-TS1-endo** from trienamine and **R3** fragments.



## Cartesian coordinates of all the stationary points

### R1a

Energy + zep (gas) = -578.92656 au

Gibbs free energy (gas) = -578.96804 au

Gibbs free energy (in solvent) = -578.72407 au

Zero-point correction = 0.23220 au

Thermal correction to Gibbs free energy = 0.19073 au

Standard orientation:

| Center<br>Number | Atomic<br>Number | Atomic<br>Type | Coordinates (Angstroms) |           |           |
|------------------|------------------|----------------|-------------------------|-----------|-----------|
|                  |                  |                | X                       | Y         | Z         |
| 1                | 6                | 0              | -1.180446               | -0.238265 | -0.569488 |
| 2                | 6                | 0              | -0.740804               | 0.917189  | -0.029609 |
| 3                | 6                | 0              | 0.671898                | 1.353877  | 0.044460  |
| 4                | 1                | 0              | -0.432782               | -0.926206 | -0.956572 |
| 5                | 1                | 0              | -1.433063               | 1.700890  | 0.254915  |
| 6                | 6                | 0              | -2.556169               | -0.665695 | -0.783412 |
| 7                | 6                | 0              | -3.663364               | -0.373950 | -0.069729 |
| 8                | 6                | 0              | -3.685274               | 0.477829  | 1.171138  |
| 9                | 6                | 0              | 1.799164                | 0.358135  | 0.046006  |
| 10               | 6                | 0              | 3.022693                | 0.758188  | -0.507357 |
| 11               | 6                | 0              | 1.704925                | -0.904471 | 0.644486  |
| 12               | 6                | 0              | 4.116320                | -0.098099 | -0.497074 |
| 13               | 1                | 0              | 3.093500                | 1.750204  | -0.936213 |
| 14               | 6                | 0              | 2.808515                | -1.754795 | 0.672378  |
| 15               | 1                | 0              | 0.779763                | -1.211995 | 1.115585  |
| 16               | 6                | 0              | 4.011296                | -1.358223 | 0.093486  |
| 17               | 1                | 0              | 5.053971                | 0.216792  | -0.941138 |
| 18               | 1                | 0              | 2.729303                | -2.724556 | 1.150775  |
| 19               | 1                | 0              | 4.867022                | -2.024031 | 0.109442  |
| 20               | 6                | 0              | -4.999621               | -0.930764 | -0.483717 |
| 21               | 1                | 0              | -4.935067               | -1.517389 | -1.401482 |
| 22               | 1                | 0              | -5.418480               | -1.565757 | 0.305833  |
| 23               | 1                | 0              | -2.681591               | -1.351713 | -1.618401 |
| 24               | 1                | 0              | -5.720781               | -0.120520 | -0.644382 |
| 25               | 1                | 0              | -4.440390               | 0.109694  | 1.871943  |
| 26               | 1                | 0              | -2.719963               | 0.500671  | 1.678108  |
| 27               | 1                | 0              | -3.956268               | 1.513215  | 0.930869  |
| 28               | 8                | 0              | 0.920004                | 2.550621  | 0.086413  |

### R1b

Energy + zep (gas) = -539.62795 au

Gibbs free energy (gas) = -539.66790 au  
 Gibbs free energy (in solvent) = -539.44229 au  
 Zero-point correction = 0.20402 au  
 Thermal correction to Gibbs free energy = 0.16406 au

Standard orientation:

| Center<br>Number | Atomic<br>Number | Atomic<br>Type | Coordinates (Angstroms) |           |           |
|------------------|------------------|----------------|-------------------------|-----------|-----------|
|                  |                  |                | X                       | Y         | Z         |
| 1                | 6                | 0              | -1.516365               | -0.218423 | 0.441118  |
| 2                | 6                | 0              | -1.061432               | 0.899428  | -0.155943 |
| 3                | 6                | 0              | 0.349396                | 1.343285  | -0.217652 |
| 4                | 1                | 0              | -0.793346               | -0.887574 | 0.898756  |
| 5                | 1                | 0              | -1.753563               | 1.648584  | -0.528186 |
| 6                | 6                | 0              | -2.914669               | -0.615248 | 0.589734  |
| 7                | 6                | 0              | -3.936144               | -0.207972 | -0.176626 |
| 8                | 6                | 0              | 1.482188                | 0.361111  | -0.101351 |
| 9                | 6                | 0              | 1.418276                | -0.943154 | -0.607242 |
| 10               | 6                | 0              | 2.681503                | 0.812418  | 0.465282  |
| 11               | 6                | 0              | 2.527360                | -1.783251 | -0.530934 |
| 12               | 1                | 0              | 0.513607                | -1.292385 | -1.089049 |
| 13               | 6                | 0              | 3.779959                | -0.032556 | 0.559349  |
| 14               | 1                | 0              | 2.730244                | 1.834142  | 0.821307  |
| 15               | 6                | 0              | 3.705044                | -1.333940 | 0.060963  |
| 16               | 1                | 0              | 2.472298                | -2.786367 | -0.938694 |
| 17               | 1                | 0              | 4.698291                | 0.322890  | 1.013068  |
| 18               | 1                | 0              | 4.564982                | -1.991223 | 0.126324  |
| 19               | 1                | 0              | -3.118574               | -1.331261 | 1.383381  |
| 20               | 8                | 0              | 0.590190                | 2.535164  | -0.345286 |
| 21               | 1                | 0              | -3.735590               | 0.470781  | -1.003362 |
| 22               | 6                | 0              | -5.360793               | -0.628091 | 0.000664  |
| 23               | 1                | 0              | -5.479430               | -1.316382 | 0.840181  |
| 24               | 1                | 0              | -6.003514               | 0.242077  | 0.177470  |
| 25               | 1                | 0              | -5.742867               | -1.116236 | -0.903083 |

**R2**

Energy + zep (gas) = -590.48113 au  
 Gibbs free energy (gas) = -590.51737 au  
 Gibbs free energy (in solvent) = -590.30518 au  
 Zero-point correction = 0.14850 au  
 Thermal correction to Gibbs free energy = 0.11226 au

Standard orientation:

| Center<br>Number | Atomic<br>Number | Atomic<br>Type | Coordinates (Angstroms) |           |           |
|------------------|------------------|----------------|-------------------------|-----------|-----------|
|                  |                  |                | X                       | Y         | Z         |
| 1                | 6                | 0              | -1.574283               | -1.128773 | 0.239763  |
| 2                | 6                | 0              | -2.991887               | -0.650402 | 0.139495  |
| 3                | 6                | 0              | -2.991899               | 0.650353  | -0.139629 |
| 4                | 6                | 0              | -1.574301               | 1.128758  | -0.239865 |
| 5                | 7                | 0              | -0.761528               | 0.000012  | -0.000020 |
| 6                | 8                | 0              | -1.197314               | -2.248428 | 0.474384  |
| 7                | 8                | 0              | -1.197375               | 2.248434  | -0.474475 |
| 8                | 6                | 0              | 0.667050                | 0.000018  | 0.000016  |
| 9                | 6                | 0              | 1.363657                | -1.065491 | -0.574967 |
| 10               | 6                | 0              | 1.363640                | 1.065515  | 0.575050  |
| 11               | 6                | 0              | 2.755118                | -1.062999 | -0.564363 |
| 12               | 6                | 0              | 3.455903                | 0.000001  | 0.000093  |
| 13               | 6                | 0              | 2.755101                | 1.063007  | 0.564517  |
| 14               | 1                | 0              | 3.290768                | -1.895805 | -1.005316 |
| 15               | 1                | 0              | 0.821985                | -1.893674 | -1.009291 |
| 16               | 1                | 0              | 4.539761                | -0.000006 | 0.000122  |
| 17               | 1                | 0              | 3.290740                | 1.895804  | 1.005503  |
| 18               | 1                | 0              | 0.821956                | 1.893698  | 1.009354  |
| 19               | 1                | 0              | -3.822785               | -1.324614 | 0.286449  |
| 20               | 1                | 0              | -3.822810               | 1.324545  | -0.286606 |

### R1a-1

Energy + zep (gas) = -578.93322 au

Gibbs free energy (gas) = -578.97488 au

Gibbs free energy (in solvent) = -578.72955 au

Zero-point correction = 0.23201 au

Thermal correction to Gibbs free energy = 0.19035 au

Standard orientation:

| Center<br>Number | Atomic<br>Number | Atomic<br>Type | Coordinates (Angstroms) |           |           |
|------------------|------------------|----------------|-------------------------|-----------|-----------|
|                  |                  |                | X                       | Y         | Z         |
| 1                | 6                | 0              | 1.288705                | 0.538383  | -0.035938 |
| 2                | 6                | 0              | 0.491321                | 1.590217  | -0.316722 |
| 3                | 6                | 0              | -0.970483               | 1.660523  | -0.112373 |
| 4                | 1                | 0              | 0.831026                | -0.379977 | 0.314525  |
| 5                | 1                | 0              | 0.928416                | 2.541509  | -0.608334 |
| 6                | 6                | 0              | 2.730159                | 0.578857  | -0.147017 |
| 7                | 6                | 0              | 3.595402                | -0.417990 | 0.135477  |

|    |   |   |           |           |           |
|----|---|---|-----------|-----------|-----------|
| 8  | 6 | 0 | 3.201000  | -1.781875 | 0.633528  |
| 9  | 6 | 0 | -1.810988 | 0.412790  | -0.078441 |
| 10 | 6 | 0 | -2.960499 | 0.420225  | 0.722080  |
| 11 | 6 | 0 | -1.542876 | -0.709511 | -0.871787 |
| 12 | 6 | 0 | -3.802433 | -0.684178 | 0.758931  |
| 13 | 1 | 0 | -3.176897 | 1.307738  | 1.303991  |
| 14 | 6 | 0 | -2.399419 | -1.808453 | -0.850346 |
| 15 | 1 | 0 | -0.683788 | -0.711781 | -1.531230 |
| 16 | 6 | 0 | -3.523124 | -1.802470 | -0.027790 |
| 17 | 1 | 0 | -4.681618 | -0.672854 | 1.393375  |
| 18 | 1 | 0 | -2.191998 | -2.665811 | -1.480902 |
| 19 | 1 | 0 | -4.184976 | -2.661138 | -0.006130 |
| 20 | 6 | 0 | 5.076601  | -0.214929 | -0.036687 |
| 21 | 1 | 0 | 5.313361  | 0.786929  | -0.398048 |
| 22 | 1 | 0 | 5.603666  | -0.371962 | 0.911874  |
| 23 | 1 | 0 | 3.144619  | 1.521613  | -0.497321 |
| 24 | 1 | 0 | 5.489677  | -0.943132 | -0.744775 |
| 25 | 1 | 0 | 3.664314  | -1.977802 | 1.607390  |
| 26 | 1 | 0 | 2.125802  | -1.915988 | 0.740807  |
| 27 | 1 | 0 | 3.572874  | -2.556283 | -0.047191 |
| 28 | 8 | 0 | -1.499333 | 2.751175  | 0.050559  |

**2-B-TS-1a**

Energy + zep (gas) = -1169.36480 au

Gibbs free energy (gas) = -1169.42006 au

Gibbs free energy (in solvent) = -1169.98070 au

Zero-point correction = 0.38251 au

Thermal correction to Gibbs free energy = 0.32725 au

Standard orientation:

| Center<br>Number | Atomic<br>Number | Atomic<br>Type | Coordinates (Angstroms) |           |           |
|------------------|------------------|----------------|-------------------------|-----------|-----------|
|                  |                  |                | X                       | Y         | Z         |
| 1                | 6                | 0              | -0.462164               | -0.122969 | 1.341124  |
| 2                | 6                | 0              | -0.216607               | 1.339259  | 1.508347  |
| 3                | 6                | 0              | -1.352152               | 2.023395  | 1.047385  |
| 4                | 6                | 0              | -2.347581               | 1.014392  | 0.603912  |
| 5                | 7                | 0              | -1.703327               | -0.249358 | 0.682518  |
| 6                | 8                | 0              | 0.242740                | -1.038340 | 1.697287  |
| 7                | 8                | 0              | -3.491807               | 1.187290  | 0.256660  |
| 8                | 6                | 0              | -2.305302               | -1.483356 | 0.291687  |
| 9                | 6                | 0              | -2.167237               | -2.624460 | 1.087255  |
| 10               | 6                | 0              | -3.038662               | -1.545868 | -0.896865 |

|    |   |   |           |           |           |
|----|---|---|-----------|-----------|-----------|
| 11 | 6 | 0 | -2.756276 | -3.819575 | 0.683903  |
| 12 | 6 | 0 | -3.491507 | -3.885338 | -0.496796 |
| 13 | 6 | 0 | -3.632406 | -2.743185 | -1.281890 |
| 14 | 1 | 0 | -2.640965 | -4.701727 | 1.303288  |
| 15 | 1 | 0 | -1.590723 | -2.578339 | 1.999154  |
| 16 | 1 | 0 | -3.952202 | -4.817782 | -0.802057 |
| 17 | 1 | 0 | -4.205837 | -2.781052 | -2.201089 |
| 18 | 1 | 0 | -3.157652 | -0.659174 | -1.503190 |
| 19 | 1 | 0 | 0.417408  | 1.659962  | 2.322034  |
| 20 | 1 | 0 | -1.710702 | 2.951723  | 1.465635  |
| 21 | 6 | 0 | 1.458217  | 1.634982  | 0.130886  |
| 22 | 6 | 0 | 0.867598  | 1.435342  | -1.124952 |
| 23 | 6 | 0 | -0.270903 | 2.096520  | -1.558997 |
| 24 | 6 | 0 | -0.986778 | 3.118591  | -0.897586 |
| 25 | 1 | 0 | 1.197592  | 0.590909  | -1.718864 |
| 26 | 6 | 0 | -2.354857 | 3.447913  | -1.454154 |
| 27 | 1 | 0 | -2.257049 | 4.248461  | -2.198566 |
| 28 | 1 | 0 | -3.027306 | 3.808609  | -0.673709 |
| 29 | 1 | 0 | -2.829496 | 2.589973  | -1.927767 |
| 30 | 1 | 0 | -0.773947 | 1.653046  | -2.415242 |
| 31 | 6 | 0 | 2.664349  | 0.919093  | 0.664149  |
| 32 | 8 | 0 | 3.235658  | 1.431838  | 1.614722  |
| 33 | 6 | 0 | 3.244026  | -0.300698 | 0.013339  |
| 34 | 6 | 0 | 2.483234  | -1.335664 | -0.544656 |
| 35 | 6 | 0 | 4.642193  | -0.410185 | 0.016267  |
| 36 | 6 | 0 | 3.112104  | -2.447474 | -1.099960 |
| 37 | 1 | 0 | 1.404339  | -1.311369 | -0.494241 |
| 38 | 6 | 0 | 5.267033  | -1.509993 | -0.557187 |
| 39 | 1 | 0 | 5.221455  | 0.379680  | 0.478061  |
| 40 | 6 | 0 | 4.501875  | -2.532091 | -1.119054 |
| 41 | 1 | 0 | 2.512273  | -3.252661 | -1.508549 |
| 42 | 1 | 0 | 6.349161  | -1.575994 | -0.559595 |
| 43 | 1 | 0 | 4.987478  | -3.395716 | -1.559629 |
| 44 | 1 | 0 | 1.456724  | 2.624356  | 0.556959  |
| 45 | 6 | 0 | -0.332149 | 4.336876  | -0.269937 |
| 46 | 1 | 0 | 0.565701  | 4.142526  | 0.307279  |
| 47 | 1 | 0 | -0.051942 | 5.019259  | -1.081501 |
| 48 | 1 | 0 | -1.040030 | 4.871483  | 0.367291  |

---

### 2-B-TS-1b

Energy + zep (gas) = -1130.07701 au

Gibbs free energy (gas) = -1130.13027 au

Gibbs free energy (in solvent) = -1129.70900 au

Zero-point correction = 0.35487 au

Thermal correction to Gibbs free energy = 0.30161 au

Standard orientation:

| Center<br>Number | Atomic<br>Number | Atomic<br>Type | Coordinates (Angstroms) |           |           |
|------------------|------------------|----------------|-------------------------|-----------|-----------|
|                  |                  |                | X                       | Y         | Z         |
| 1                | 6                | 0              | 0.519015                | -0.079823 | 1.337312  |
| 2                | 6                | 0              | 0.210655                | -1.525678 | 1.494714  |
| 3                | 6                | 0              | 1.298033                | -2.260392 | 1.008293  |
| 4                | 6                | 0              | 2.339448                | -1.294452 | 0.555885  |
| 5                | 7                | 0              | 1.760633                | -0.005923 | 0.663641  |
| 6                | 8                | 0              | -0.134913               | 0.867388  | 1.707721  |
| 7                | 8                | 0              | 3.460567                | -1.526867 | 0.172476  |
| 8                | 6                | 0              | 2.413484                | 1.203174  | 0.274945  |
| 9                | 6                | 0              | 2.349820                | 2.336654  | 1.090166  |
| 10               | 6                | 0              | 3.122000                | 1.247743  | -0.929176 |
| 11               | 6                | 0              | 2.988240                | 3.507586  | 0.690917  |
| 12               | 6                | 0              | 3.699261                | 3.555484  | -0.505353 |
| 13               | 6                | 0              | 3.765915                | 2.420258  | -1.310066 |
| 14               | 1                | 0              | 2.930723                | 4.384505  | 1.325587  |
| 15               | 1                | 0              | 1.793140                | 2.304657  | 2.015037  |
| 16               | 1                | 0              | 4.198663                | 4.468751  | -0.807647 |
| 17               | 1                | 0              | 4.319640                | 2.444342  | -2.241708 |
| 18               | 1                | 0              | 3.183376                | 0.365587  | -1.550645 |
| 19               | 1                | 0              | -0.473520               | -1.837249 | 2.269752  |
| 20               | 1                | 0              | 1.616290                | -3.212945 | 1.406705  |
| 21               | 6                | 0              | -1.475942               | -1.731915 | -0.000257 |
| 22               | 6                | 0              | -0.838523               | -1.428046 | -1.204379 |
| 23               | 6                | 0              | 0.283871                | -2.134904 | -1.627066 |
| 24               | 6                | 0              | 0.824948                | -3.197254 | -0.894178 |
| 25               | 1                | 0              | -1.132303               | -0.543333 | -1.756250 |
| 26               | 6                | 0              | 2.060596                | -3.921995 | -1.352602 |
| 27               | 1                | 0              | 0.128523                | -3.800883 | -0.322151 |
| 28               | 1                | 0              | 1.798609                | -4.613435 | -2.162208 |
| 29               | 1                | 0              | 2.503190                | -4.513359 | -0.549085 |
| 30               | 1                | 0              | 2.822662                | -3.233123 | -1.718319 |
| 31               | 1                | 0              | 0.847864                | -1.751754 | -2.472970 |
| 32               | 6                | 0              | -2.705840               | -1.086814 | 0.557761  |
| 33               | 8                | 0              | -3.299679               | -1.689879 | 1.439206  |
| 34               | 6                | 0              | -3.275309               | 0.183658  | 0.003087  |
| 35               | 6                | 0              | -2.502693               | 1.270446  | -0.424627 |
| 36               | 6                | 0              | -4.673580               | 0.284450  | -0.035188 |
| 37               | 6                | 0              | -3.120776               | 2.426826  | -0.894933 |

|    |   |   |           |           |           |
|----|---|---|-----------|-----------|-----------|
| 38 | 1 | 0 | -1.426290 | 1.247541  | -0.332885 |
| 39 | 6 | 0 | -5.286266 | 1.430363  | -0.525245 |
| 40 | 1 | 0 | -5.262571 | -0.548679 | 0.327766  |
| 41 | 6 | 0 | -4.509570 | 2.505185  | -0.958592 |
| 42 | 1 | 0 | -2.513473 | 3.270509  | -1.202262 |
| 43 | 1 | 0 | -6.368083 | 1.490699  | -0.562373 |
| 44 | 1 | 0 | -4.986243 | 3.403980  | -1.333699 |
| 45 | 1 | 0 | -1.433146 | -2.752819 | 0.358136  |

### R3

Energy + zep (gas) = -669.05635 au

Gibbs free energy (gas) = -669.09946 au

Gibbs free energy (in solvent) = -668.84095 au

Zero-point correction = 0.20343 au

Thermal correction to Gibbs free energy = 0.16032 au

Standard orientation:

| Center<br>Number | Atomic<br>Number | Atomic<br>Type | Coordinates (Angstroms) |           |           |
|------------------|------------------|----------------|-------------------------|-----------|-----------|
|                  |                  |                | X                       | Y         | Z         |
| 1                | 6                | 0              | -2.100340               | 0.716002  | -0.000022 |
| 2                | 8                | 0              | -2.855582               | 1.655889  | -0.000052 |
| 3                | 6                | 0              | -0.609617               | 0.855144  | -0.000004 |
| 4                | 6                | 0              | 0.207456                | -0.229098 | -0.000001 |
| 5                | 6                | 0              | -0.156291               | 2.208283  | 0.000003  |
| 6                | 8                | 0              | -2.499613               | -0.571378 | 0.000032  |
| 7                | 6                | 0              | 1.657465                | -0.358487 | 0.000003  |
| 8                | 6                | 0              | 2.173521                | -1.670108 | -0.000037 |
| 9                | 6                | 0              | 2.570072                | 0.715228  | 0.000043  |
| 10               | 6                | 0              | 3.541277                | -1.906575 | -0.000040 |
| 11               | 6                | 0              | 4.428900                | -0.832328 | 0.000000  |
| 12               | 6                | 0              | 3.937326                | 0.473461  | 0.000042  |
| 13               | 1                | 0              | 3.914623                | -2.923992 | -0.000072 |
| 14               | 1                | 0              | 1.483410                | -2.507101 | -0.000066 |
| 15               | 1                | 0              | 5.498303                | -1.010026 | -0.000001 |
| 16               | 1                | 0              | 4.625430                | 1.310799  | 0.000075  |
| 17               | 1                | 0              | 2.216115                | 1.735882  | 0.000077  |
| 18               | 1                | 0              | -0.321060               | -1.175973 | -0.000001 |
| 19               | 6                | 0              | -3.934281               | -0.788457 | 0.000019  |
| 20               | 6                | 0              | -4.167976               | -2.284445 | 0.000019  |
| 21               | 1                | 0              | -4.358353               | -0.304239 | -0.882226 |
| 22               | 1                | 0              | -4.358368               | -0.304240 | 0.882257  |
| 23               | 1                | 0              | -5.241605               | -2.489251 | 0.000019  |
| 24               | 1                | 0              | -3.731022               | -2.748752 | 0.886812  |

|    |   |   |           |           |           |
|----|---|---|-----------|-----------|-----------|
| 25 | 1 | 0 | -3.731022 | -2.748754 | -0.886773 |
| 26 | 7 | 0 | 0.222861  | 3.299693  | -0.000013 |

**3-B-TS-1a**

Energy + zep (gas) = -1247.91375 au

Gibbs free energy (gas) = -1247.97399 au

Gibbs free energy (in solvent) = -1247.49532 au

Zero-point correction = 0.43745 au

Thermal correction to Gibbs free energy = 0.37721 au

Standard orientation:

| Center<br>Number | Atomic<br>Number | Atomic<br>Type | Coordinates (Angstroms) |           |           |
|------------------|------------------|----------------|-------------------------|-----------|-----------|
|                  |                  |                | X                       | Y         | Z         |
| 1                | 6                | 0              | -3.192711               | 0.203554  | -0.104129 |
| 2                | 6                | 0              | -3.860166               | -0.800350 | -0.820733 |
| 3                | 6                | 0              | -5.213872               | -0.674154 | -1.123769 |
| 4                | 6                | 0              | -3.929862               | 1.330787  | 0.291485  |
| 5                | 6                | 0              | -5.281183               | 1.456419  | -0.014507 |
| 6                | 6                | 0              | -5.931915               | 0.449543  | -0.722699 |
| 7                | 1                | 0              | -3.432546               | 2.124675  | 0.838536  |
| 8                | 1                | 0              | -3.330375               | -1.675051 | -1.167277 |
| 9                | 1                | 0              | -5.705198               | -1.460889 | -1.684984 |
| 10               | 1                | 0              | -6.984428               | 0.541989  | -0.964812 |
| 11               | 1                | 0              | -5.822058               | 2.342609  | 0.298175  |
| 12               | 6                | 0              | -0.952515               | -1.072370 | -1.767259 |
| 13               | 7                | 0              | -1.150215               | -1.909276 | -2.542453 |
| 14               | 6                | 0              | -0.732357               | -0.089726 | -0.764269 |
| 15               | 6                | 0              | -1.726980               | 0.190629  | 0.250804  |
| 16               | 6                | 0              | 0.256900                | 0.945798  | -1.153199 |
| 17               | 8                | 0              | 0.880243                | 0.943251  | -2.187585 |
| 18               | 8                | 0              | 0.348677                | 1.950101  | -0.236891 |
| 19               | 6                | 0              | 1.120489                | 3.104509  | -0.655376 |
| 20               | 6                | 0              | 1.087012                | 4.111425  | 0.476023  |
| 21               | 1                | 0              | 2.135898                | 2.786129  | -0.897189 |
| 22               | 1                | 0              | 0.674432                | 3.502927  | -1.569470 |
| 23               | 1                | 0              | 1.651612                | 5.003350  | 0.192127  |
| 24               | 1                | 0              | 1.532496                | 3.700356  | 1.385205  |
| 25               | 1                | 0              | 0.062035                | 4.414064  | 0.701594  |
| 26               | 1                | 0              | -1.472482               | 1.117736  | 0.748188  |
| 27               | 6                | 0              | 1.065547                | -1.496616 | 0.453057  |
| 28               | 6                | 0              | 0.910368                | -0.889756 | 1.693412  |
| 29               | 6                | 0              | -0.311103               | -0.664814 | 2.306638  |
| 30               | 6                | 0              | -1.617312               | -0.993256 | 1.822351  |



|    |   |   |           |           |           |
|----|---|---|-----------|-----------|-----------|
| 31 | 1 | 0 | 1.780125  | -0.444575 | 2.162291  |
| 32 | 6 | 0 | -2.718138 | -0.528417 | 2.774008  |
| 33 | 1 | 0 | -2.720873 | -1.175322 | 3.657938  |
| 34 | 1 | 0 | -3.703780 | -0.592288 | 2.315607  |
| 35 | 1 | 0 | -2.560265 | 0.498950  | 3.110951  |
| 36 | 1 | 0 | -0.284542 | -0.010246 | 3.174835  |
| 37 | 6 | 0 | 2.357130  | -1.690359 | -0.271737 |
| 38 | 8 | 0 | 2.427004  | -2.644906 | -1.029834 |
| 39 | 6 | 0 | 3.560433  | -0.827489 | -0.035022 |
| 40 | 6 | 0 | 3.497868  | 0.493670  | 0.424415  |
| 41 | 6 | 0 | 4.812415  | -1.382245 | -0.337164 |
| 42 | 6 | 0 | 4.664104  | 1.237469  | 0.590930  |
| 43 | 1 | 0 | 2.540464  | 0.954002  | 0.624863  |
| 44 | 6 | 0 | 5.974662  | -0.644136 | -0.158591 |
| 45 | 1 | 0 | 4.845947  | -2.395761 | -0.716457 |
| 46 | 6 | 0 | 5.903368  | 0.668827  | 0.308371  |
| 47 | 1 | 0 | 4.604251  | 2.263082  | 0.937521  |
| 48 | 1 | 0 | 6.936844  | -1.087680 | -0.387839 |
| 49 | 1 | 0 | 6.810051  | 1.247708  | 0.444226  |
| 50 | 1 | 0 | 0.338447  | -2.201846 | 0.092074  |
| 51 | 6 | 0 | -1.918681 | -2.400114 | 1.298807  |
| 52 | 1 | 0 | -1.415914 | -2.670813 | 0.374853  |
| 53 | 1 | 0 | -1.627344 | -3.129076 | 2.061249  |
| 54 | 1 | 0 | -2.989702 | -2.509642 | 1.128364  |

-----

### 3-B-TS-1b

Energy + zep (gas) = -1208.63110 au

Gibbs free energy (gas) = -1208.68986 au

Gibbs free energy (in solvent) = -1208.22775 au

Zero-point correction = 0.40914 au

Thermal correction to Gibbs free energy = 0.35039 au

Standard orientation:

-----

| Center<br>Number | Atomic<br>Number | Atomic<br>Type | Coordinates (Angstroms) |           |           |
|------------------|------------------|----------------|-------------------------|-----------|-----------|
|                  |                  |                | X                       | Y         | Z         |
| 1                | 6                | 0              | -3.187420               | -0.328762 | -0.110596 |
| 2                | 6                | 0              | -3.231801               | -1.721657 | 0.026325  |
| 3                | 6                | 0              | -4.430845               | -2.411777 | -0.123806 |
| 4                | 6                | 0              | -4.377604               | 0.350609  | -0.399365 |
| 5                | 6                | 0              | -5.576839               | -0.339554 | -0.555362 |
| 6                | 6                | 0              | -5.607270               | -1.724512 | -0.414995 |
| 7                | 1                | 0              | -4.361334               | 1.429760  | -0.511311 |
| 8                | 1                | 0              | -2.327805               | -2.282021 | 0.232732  |

|    |   |   |           |           |           |
|----|---|---|-----------|-----------|-----------|
| 9  | 1 | 0 | -4.441987 | -3.490735 | -0.021639 |
| 10 | 1 | 0 | -6.538980 | -2.265267 | -0.535103 |
| 11 | 1 | 0 | -6.485033 | 0.205626  | -0.786364 |
| 12 | 6 | 0 | -0.769140 | -0.983082 | -1.653964 |
| 13 | 7 | 0 | -0.757707 | -1.912530 | -2.343169 |
| 14 | 6 | 0 | -0.795572 | 0.159972  | -0.810127 |
| 15 | 6 | 0 | -1.922879 | 0.468290  | 0.043669  |
| 16 | 6 | 0 | 0.132407  | 1.242406  | -1.205316 |
| 17 | 8 | 0 | 0.980105  | 1.168511  | -2.066116 |
| 18 | 8 | 0 | -0.081060 | 2.368437  | -0.473709 |
| 19 | 6 | 0 | 0.755503  | 3.505526  | -0.797882 |
| 20 | 6 | 0 | 0.225250  | 4.700448  | -0.032615 |
| 21 | 1 | 0 | 1.786788  | 3.271651  | -0.521678 |
| 22 | 1 | 0 | 0.728594  | 3.661012  | -1.877748 |
| 23 | 1 | 0 | 0.836023  | 5.579827  | -0.252474 |
| 24 | 1 | 0 | 0.256423  | 4.524578  | 1.045036  |
| 25 | 1 | 0 | -0.805671 | 4.920488  | -0.318368 |
| 26 | 1 | 0 | -2.118555 | 1.535100  | 0.035373  |
| 27 | 6 | 0 | 0.825530  | -0.913562 | 0.881766  |
| 28 | 6 | 0 | 0.916819  | 0.223504  | 1.670071  |
| 29 | 6 | 0 | -0.220545 | 0.854917  | 2.157261  |
| 30 | 6 | 0 | -1.539755 | 0.386810  | 1.902933  |
| 31 | 1 | 0 | 1.884834  | 0.686784  | 1.825841  |
| 32 | 6 | 0 | -2.666952 | 1.119581  | 2.609521  |
| 33 | 1 | 0 | -1.641047 | -0.694874 | 1.957328  |
| 34 | 1 | 0 | -2.618993 | 0.930341  | 3.685851  |
| 35 | 1 | 0 | -3.645161 | 0.790651  | 2.259489  |
| 36 | 1 | 0 | -2.590857 | 2.199915  | 2.456527  |
| 37 | 1 | 0 | -0.103274 | 1.816728  | 2.647806  |
| 38 | 6 | 0 | 1.966324  | -1.745697 | 0.395764  |
| 39 | 8 | 0 | 1.755409  | -2.939781 | 0.255558  |
| 40 | 6 | 0 | 3.342890  | -1.187597 | 0.214785  |
| 41 | 6 | 0 | 3.590521  | 0.086527  | -0.307841 |
| 42 | 6 | 0 | 4.423676  | -2.019969 | 0.537891  |
| 43 | 6 | 0 | 4.901102  | 0.523719  | -0.488886 |
| 44 | 1 | 0 | 2.770392  | 0.707665  | -0.641058 |
| 45 | 6 | 0 | 5.728172  | -1.571083 | 0.379334  |
| 46 | 1 | 0 | 4.218160  | -3.016504 | 0.908791  |
| 47 | 6 | 0 | 5.969412  | -0.295635 | -0.133277 |
| 48 | 1 | 0 | 5.086061  | 1.500985  | -0.920242 |
| 49 | 1 | 0 | 6.558013  | -2.216220 | 0.644687  |
| 50 | 1 | 0 | 6.987901  | 0.051636  | -0.267067 |
| 51 | 1 | 0 | -0.072083 | -1.513277 | 0.918185  |

**3-B-TS-1a'**

Energy + zep (gas) = -1247.93146 au

Gibbs free energy (gas) = -1247.99084 au

Gibbs free energy (in solvent) = -1247.50989 au

Zero-point correction = 0.43721 au

Thermal correction to Gibbs free energy = 0.37783 au

Standard orientation:

| Center<br>Number | Atomic<br>Number | Atomic<br>Type | Coordinates (Angstroms) |           |           |
|------------------|------------------|----------------|-------------------------|-----------|-----------|
|                  |                  |                | X                       | Y         | Z         |
| 1                | 6                | 0              | -0.577914               | 1.730555  | -0.803811 |
| 2                | 6                | 0              | -0.416058               | 2.986334  | -0.209640 |
| 3                | 6                | 0              | -1.154749               | 4.079653  | -0.651083 |
| 4                | 6                | 0              | -1.508572               | 1.597489  | -1.840959 |
| 5                | 6                | 0              | -2.246473               | 2.691464  | -2.285067 |
| 6                | 6                | 0              | -2.071195               | 3.937759  | -1.690393 |
| 7                | 1                | 0              | -1.653141               | 0.629156  | -2.308010 |
| 8                | 1                | 0              | 0.291701                | 3.124126  | 0.597600  |
| 9                | 1                | 0              | -1.012129               | 5.045226  | -0.179714 |
| 10               | 1                | 0              | -2.645733               | 4.791518  | -2.031325 |
| 11               | 1                | 0              | -2.957978               | 2.567012  | -3.093664 |
| 12               | 6                | 0              | 0.201903                | 0.503346  | -0.385334 |
| 13               | 6                | 0              | 1.653125                | 0.522884  | -0.548974 |
| 14               | 1                | 0              | -0.193615               | -0.363691 | -0.898643 |
| 15               | 6                | 0              | 2.384714                | -0.653907 | -0.998625 |
| 16               | 8                | 0              | 3.580006                | -0.699813 | -1.230554 |
| 17               | 6                | 0              | 2.199816                | -2.963124 | -1.604541 |
| 18               | 1                | 0              | 3.192299                | -3.039795 | -1.159194 |
| 19               | 6                | 0              | 2.397013                | 1.715236  | -0.486940 |
| 20               | 7                | 0              | 3.000895                | 2.700153  | -0.366783 |
| 21               | 6                | 0              | -0.275898               | 0.180456  | 1.311589  |
| 22               | 6                | 0              | 0.375974                | -0.992528 | 1.833516  |
| 23               | 6                | 0              | 1.729220                | -1.133404 | 2.080111  |
| 24               | 6                | 0              | 2.741611                | -0.164923 | 2.118616  |
| 25               | 1                | 0              | -0.205452               | -1.906639 | 1.876274  |
| 26               | 6                | 0              | 4.149484                | -0.610046 | 1.888412  |
| 27               | 1                | 0              | 4.403467                | -0.426247 | 0.832041  |
| 28               | 1                | 0              | 4.275859                | -1.680968 | 2.060370  |
| 29               | 1                | 0              | 4.862435                | -0.051173 | 2.498423  |
| 30               | 1                | 0              | 2.078216                | -2.161724 | 2.148572  |
| 31               | 6                | 0              | -1.796031               | 0.188768  | 1.446290  |
| 32               | 8                | 0              | -2.303828               | 1.111232  | 2.053832  |
| 33               | 6                | 0              | -2.653463               | -0.907179 | 0.877507  |

|    |   |   |           |           |           |
|----|---|---|-----------|-----------|-----------|
| 34 | 6 | 0 | -2.176234 | -1.951203 | 0.071015  |
| 35 | 6 | 0 | -4.024611 | -0.854603 | 1.170626  |
| 36 | 6 | 0 | -3.050969 | -2.915462 | -0.424910 |
| 37 | 1 | 0 | -1.127242 | -2.024523 | -0.183118 |
| 38 | 6 | 0 | -4.893788 | -1.818462 | 0.678774  |
| 39 | 1 | 0 | -4.382009 | -0.039071 | 1.786380  |
| 40 | 6 | 0 | -4.408482 | -2.853189 | -0.121738 |
| 41 | 1 | 0 | -2.669972 | -3.714872 | -1.050148 |
| 42 | 1 | 0 | -5.950277 | -1.764303 | 0.915474  |
| 43 | 1 | 0 | -5.086279 | -3.605917 | -0.508526 |
| 44 | 1 | 0 | 0.068456  | 1.110723  | 1.750326  |
| 45 | 6 | 0 | 2.587833  | 1.236495  | 2.608534  |
| 46 | 1 | 0 | 1.569116  | 1.509473  | 2.869989  |
| 47 | 1 | 0 | 3.204910  | 1.334194  | 3.510259  |
| 48 | 1 | 0 | 2.987802  | 1.963551  | 1.889373  |
| 49 | 1 | 0 | 1.566145  | -3.763625 | -1.219555 |
| 50 | 8 | 0 | 1.569515  | -1.748180 | -1.135207 |
| 51 | 6 | 0 | 2.282221  | -3.000567 | -3.122058 |
| 52 | 1 | 0 | 2.696590  | -3.959600 | -3.446647 |
| 53 | 1 | 0 | 1.292162  | -2.885697 | -3.569798 |
| 54 | 1 | 0 | 2.932004  | -2.205168 | -3.489331 |

**3-B-TS-1b'**

Energy + zep (gas) = -1208.63926 au

Gibbs free energy (gas) = -1208.69747 au

Gibbs free energy (in solvent) = -1208.23829 au

Zero-point correction = 0.40950 au

Thermal correction to Gibbs free energy = 0.35132 au

Standard orientation:

| Center<br>Number | Atomic<br>Number | Atomic<br>Type | Coordinates (Angstroms) |          |           |
|------------------|------------------|----------------|-------------------------|----------|-----------|
|                  |                  |                | X                       | Y        | Z         |
| 1                | 6                | 0              | 0.223039                | 1.879783 | 0.645864  |
| 2                | 6                | 0              | -0.087678               | 3.093306 | 0.021040  |
| 3                | 6                | 0              | 0.538077                | 4.272068 | 0.412682  |
| 4                | 6                | 0              | 1.189667                | 1.879107 | 1.659632  |
| 5                | 6                | 0              | 1.813022                | 3.059134 | 2.054465  |
| 6                | 6                | 0              | 1.488189                | 4.260851 | 1.431476  |
| 7                | 1                | 0              | 1.451840                | 0.945720 | 2.146192  |
| 8                | 1                | 0              | -0.825157               | 3.130265 | -0.770433 |
| 9                | 1                | 0              | 0.281337                | 5.202079 | -0.081146 |
| 10               | 1                | 0              | 1.973983                | 5.181545 | 1.733769  |
| 11               | 1                | 0              | 2.553418                | 3.036970 | 2.846052  |

|    |   |   |           |           |           |
|----|---|---|-----------|-----------|-----------|
| 12 | 6 | 0 | -0.413014 | 0.570959  | 0.280540  |
| 13 | 6 | 0 | -1.851110 | 0.426938  | 0.270350  |
| 14 | 1 | 0 | 0.043128  | -0.246778 | 0.821332  |
| 15 | 6 | 0 | -2.481869 | -0.834872 | 0.706012  |
| 16 | 8 | 0 | -3.662433 | -0.986216 | 0.927865  |
| 17 | 6 | 0 | -2.083339 | -3.128301 | 1.250275  |
| 18 | 1 | 0 | -3.058565 | -3.281709 | 0.787493  |
| 19 | 6 | 0 | -2.722831 | 1.549025  | 0.277547  |
| 20 | 7 | 0 | -3.445143 | 2.453229  | 0.240605  |
| 21 | 1 | 0 | -1.371520 | -3.849500 | 0.846551  |
| 22 | 8 | 0 | -1.566803 | -1.840604 | 0.828179  |
| 23 | 6 | 0 | -2.176998 | -3.222006 | 2.764086  |
| 24 | 1 | 0 | -2.501033 | -4.226271 | 3.052083  |
| 25 | 1 | 0 | -1.207225 | -3.028543 | 3.228774  |
| 26 | 1 | 0 | -2.903994 | -2.505127 | 3.147895  |
| 27 | 6 | 0 | 0.327083  | 0.176936  | -1.459097 |
| 28 | 6 | 0 | -0.244214 | -1.014984 | -1.981136 |
| 29 | 6 | 0 | -1.594105 | -1.124157 | -2.284145 |
| 30 | 6 | 0 | -2.484844 | -0.072663 | -2.132478 |
| 31 | 1 | 0 | 0.360022  | -1.913665 | -2.022948 |
| 32 | 6 | 0 | -3.962552 | -0.212615 | -2.252965 |
| 33 | 1 | 0 | -4.296165 | 0.211457  | -3.208577 |
| 34 | 1 | 0 | -4.469812 | 0.354458  | -1.467350 |
| 35 | 1 | 0 | -4.284266 | -1.253444 | -2.198286 |
| 36 | 1 | 0 | -1.992975 | -2.109113 | -2.510195 |
| 37 | 6 | 0 | 1.835350  | 0.274277  | -1.388415 |
| 38 | 8 | 0 | 2.370434  | 1.243722  | -1.892524 |
| 39 | 6 | 0 | 2.662867  | -0.795804 | -0.734196 |
| 40 | 6 | 0 | 2.132588  | -1.843029 | 0.033585  |
| 41 | 6 | 0 | 4.054292  | -0.709840 | -0.891349 |
| 42 | 6 | 0 | 2.977449  | -2.780242 | 0.624741  |
| 43 | 1 | 0 | 1.065106  | -1.934784 | 0.185245  |
| 44 | 6 | 0 | 4.893453  | -1.648444 | -0.307123 |
| 45 | 1 | 0 | 4.450579  | 0.110464  | -1.476344 |
| 46 | 6 | 0 | 4.356172  | -2.687679 | 0.453791  |
| 47 | 1 | 0 | 2.557028  | -3.582204 | 1.220876  |
| 48 | 1 | 0 | 5.966512  | -1.571249 | -0.440210 |
| 49 | 1 | 0 | 5.010449  | -3.420011 | 0.913413  |
| 50 | 1 | 0 | -0.043282 | 1.094960  | -1.907182 |
| 51 | 1 | 0 | -2.105142 | 0.940195  | -2.170485 |

---

**I-TS**

Energy + zep (gas) = -578.92163 au

Gibbs free energy (gas) = -578.96233 au

Gibbs free energy (in solvent) = -578.71888 au

Zero-point correction = 0.23102 au

Thermal correction to Gibbs free energy = 0.19031 au

Standard orientation:

| Center<br>Number | Atomic<br>Number | Atomic<br>Type | Coordinates (Angstroms) |           |           |
|------------------|------------------|----------------|-------------------------|-----------|-----------|
|                  |                  |                | X                       | Y         | Z         |
| 1                | 6                | 0              | -1.252342               | 0.425083  | -0.522245 |
| 2                | 6                | 0              | -0.625826               | 1.316517  | 0.256136  |
| 3                | 6                | 0              | 0.846203                | 1.502386  | 0.369351  |
| 4                | 1                | 0              | -0.656546               | -0.295629 | -1.080513 |
| 5                | 1                | 0              | -1.194425               | 2.085400  | 0.771647  |
| 6                | 6                | 0              | -2.717070               | 0.409599  | -0.756301 |
| 7                | 6                | 0              | -3.616079               | -0.365386 | -0.139452 |
| 8                | 6                | 0              | -3.258127               | -1.359298 | 0.934661  |
| 9                | 6                | 0              | 1.800379                | 0.368572  | 0.120511  |
| 10               | 6                | 0              | 3.080565                | 0.687156  | -0.351993 |
| 11               | 6                | 0              | 1.496950                | -0.966657 | 0.413228  |
| 12               | 6                | 0              | 4.023966                | -0.310354 | -0.561655 |
| 13               | 1                | 0              | 3.314141                | 1.727072  | -0.544247 |
| 14               | 6                | 0              | 2.450741                | -1.964065 | 0.221995  |
| 15               | 1                | 0              | 0.527186                | -1.223818 | 0.819820  |
| 16               | 6                | 0              | 3.710633                | -1.639722 | -0.274742 |
| 17               | 1                | 0              | 5.006711                | -0.054083 | -0.941093 |
| 18               | 1                | 0              | 2.210790                | -2.992951 | 0.465429  |
| 19               | 1                | 0              | 4.449473                | -2.417919 | -0.430504 |
| 20               | 6                | 0              | -5.080934               | -0.288440 | -0.485582 |
| 21               | 1                | 0              | -5.275833               | 0.445973  | -1.269081 |
| 22               | 1                | 0              | -5.452313               | -1.261593 | -0.827116 |
| 23               | 1                | 0              | -3.068071               | 1.095242  | -1.526714 |
| 24               | 1                | 0              | -5.675970               | -0.017582 | 0.394100  |
| 25               | 1                | 0              | -3.561579               | -2.370688 | 0.640609  |
| 26               | 1                | 0              | -2.190207               | -1.369061 | 1.153813  |
| 27               | 1                | 0              | -3.791333               | -1.131108 | 1.864569  |
| 28               | 8                | 0              | 1.275453                | 2.611049  | 0.645724  |

**K-A**

Energy + zep (gas) = -1519.35099 au

Gibbs free energy (gas) = -1519.42083 au

Gibbs free energy (in solvent) = -1519.84565 au

Zero-point correction = 0.64176 au

Thermal correction to Gibbs free energy = 0.57192 au

Standard orientation:

| Center<br>Number | Atomic<br>Number | Atomic<br>Type | Coordinates (Angstroms) |           |           |
|------------------|------------------|----------------|-------------------------|-----------|-----------|
|                  |                  |                | X                       | Y         | Z         |
| 1                | 7                | 0              | 2.431654                | -1.930954 | -0.643060 |
| 2                | 6                | 0              | 2.270608                | -0.669380 | 0.115872  |
| 3                | 6                | 0              | 2.474330                | -1.676544 | -2.102787 |
| 4                | 6                | 0              | 3.707107                | -2.552558 | -0.225310 |
| 5                | 6                | 0              | 0.798177                | -0.172832 | 0.045315  |
| 6                | 6                | 0              | 3.323820                | 0.386837  | -0.314543 |
| 7                | 6                | 0              | 3.687773                | -0.781204 | -2.487729 |
| 8                | 6                | 0              | 4.930033                | -1.597864 | -0.474074 |
| 9                | 6                | 0              | 0.529601                | 0.875576  | 1.117659  |
| 10               | 6                | 0              | 4.376172                | -0.330609 | -1.186620 |
| 11               | 6                | 0              | 0.472008                | 0.501194  | 2.441474  |
| 12               | 6                | 0              | 0.370167                | 2.261915  | 0.797897  |
| 13               | 6                | 0              | 0.264883                | 1.471272  | 3.447475  |
| 14               | 6                | 0              | 0.172536                | 3.158698  | 1.903363  |
| 15               | 7                | 0              | 0.122871                | 2.752497  | 3.199394  |
| 16               | 1                | 0              | 1.530443                | -1.214687 | -2.404579 |
| 17               | 1                | 0              | 2.519221                | -2.646935 | -2.601688 |
| 18               | 1                | 0              | 3.823653                | -3.487042 | -0.778216 |
| 19               | 1                | 0              | 3.629313                | -2.812848 | 0.833184  |
| 20               | 1                | 0              | 0.598260                | 0.244283  | -0.943441 |
| 21               | 1                | 0              | 3.778383                | 0.853025  | 0.561015  |
| 22               | 1                | 0              | 2.869227                | 1.194698  | -0.895502 |
| 23               | 1                | 0              | 4.393543                | -1.332451 | -3.114576 |
| 24               | 1                | 0              | 3.361965                | 0.089188  | -3.064010 |
| 25               | 1                | 0              | 5.619646                | -2.082208 | -1.172064 |
| 26               | 1                | 0              | 5.200786                | 0.349375  | -1.407513 |
| 27               | 1                | 0              | 0.578419                | -0.538665 | 2.730492  |
| 28               | 6                | 0              | 0.382466                | 2.797513  | -0.510198 |
| 29               | 1                | 0              | 0.220776                | 1.166338  | 4.489539  |
| 30               | 6                | 0              | 0.016397                | 4.541717  | 1.641340  |
| 31               | 6                | 0              | -3.546229               | -0.476384 | -0.240697 |
| 32               | 6                | 0              | -2.215714               | -0.391470 | 0.069288  |
| 33               | 6                | 0              | -1.347778               | -1.522394 | 0.137343  |
| 34               | 7                | 0              | -0.034668               | -1.387389 | 0.184620  |
| 35               | 1                | 0              | -3.965831               | -1.454221 | -0.444810 |
| 36               | 1                | 0              | -1.780362               | 0.587008  | 0.227059  |

|    |   |   |           |           |           |
|----|---|---|-----------|-----------|-----------|
| 37 | 1 | 0 | 0.549197  | -2.229223 | 0.124198  |
| 38 | 6 | 0 | -4.403135 | 0.659586  | -0.330504 |
| 39 | 6 | 0 | -5.728081 | 0.635996  | -0.645683 |
| 40 | 6 | 0 | 0.040336  | 5.038037  | 0.362684  |
| 41 | 6 | 0 | 0.222389  | 4.154353  | -0.732271 |
| 42 | 1 | 0 | -0.123173 | 5.193528  | 2.494667  |
| 43 | 1 | 0 | -0.079721 | 6.100025  | 0.198352  |
| 44 | 8 | 0 | 0.251196  | 4.551639  | -2.027334 |
| 45 | 1 | 0 | 0.526644  | 2.177584  | -1.384822 |
| 46 | 6 | 0 | 0.141590  | 5.941601  | -2.337894 |
| 47 | 1 | 0 | 0.958584  | 6.515152  | -1.890158 |
| 48 | 1 | 0 | 0.210205  | 6.003508  | -3.421750 |
| 49 | 1 | 0 | -0.820688 | 6.348916  | -2.012786 |
| 50 | 6 | 0 | -1.855179 | -2.917261 | 0.153728  |
| 51 | 6 | 0 | -1.317859 | -3.870761 | -0.724001 |
| 52 | 6 | 0 | -2.840332 | -3.306068 | 1.073845  |
| 53 | 6 | 0 | -1.771585 | -5.184694 | -0.691701 |
| 54 | 1 | 0 | -0.567380 | -3.579507 | -1.450097 |
| 55 | 6 | 0 | -3.275397 | -4.626778 | 1.112842  |
| 56 | 1 | 0 | -3.236443 | -2.585026 | 1.778492  |
| 57 | 6 | 0 | -2.747488 | -5.565253 | 0.227956  |
| 58 | 1 | 0 | -1.364840 | -5.910857 | -1.385107 |
| 59 | 1 | 0 | -4.022187 | -4.924232 | 1.839172  |
| 60 | 1 | 0 | -3.093356 | -6.591640 | 0.256906  |
| 61 | 6 | 0 | 6.991428  | -1.532675 | 0.960452  |
| 62 | 1 | 0 | 7.491954  | -1.300202 | 1.893188  |
| 63 | 6 | 0 | 5.693505  | -1.300113 | 0.787160  |
| 64 | 1 | 0 | 5.125599  | -0.871700 | 1.612401  |
| 65 | 6 | 0 | -6.508521 | 1.915042  | -0.691342 |
| 66 | 1 | 0 | -6.962146 | 2.049823  | -1.679612 |
| 67 | 1 | 0 | -7.338288 | 1.879492  | 0.023552  |
| 68 | 1 | 0 | -3.950262 | 1.624861  | -0.122180 |
| 69 | 1 | 0 | 7.602486  | -1.965038 | 0.173846  |
| 70 | 1 | 0 | -5.893585 | 2.786450  | -0.467119 |
| 71 | 6 | 0 | -6.514268 | -0.600867 | -0.962253 |
| 72 | 1 | 0 | -5.941267 | -1.524500 | -0.909383 |
| 73 | 1 | 0 | -7.364147 | -0.684816 | -0.276565 |
| 74 | 1 | 0 | -6.940304 | -0.520530 | -1.968127 |
| 75 | 1 | 0 | 2.444540  | -0.940896 | 1.161516  |

---

**T-A**

Energy + zep (gas) = -1519.31741 au

Gibbs free energy (gas) = -1519.38748 au

Gibbs free energy (in solvent) = -1519.82946 au



Zero-point correction = 0.64349 au

Thermal correction to Gibbs free energy = 0.57342 au

Standard orientation:

| Center<br>Number | Atomic<br>Number | Atomic<br>Type | Coordinates (Angstroms) |           |           |
|------------------|------------------|----------------|-------------------------|-----------|-----------|
|                  |                  |                | X                       | Y         | Z         |
| 1                | 1                | 0              | 1.316743                | -2.471983 | -0.759964 |
| 2                | 7                | 0              | 2.154079                | -1.926697 | -1.020730 |
| 3                | 6                | 0              | 2.189524                | -0.814241 | 0.026852  |
| 4                | 6                | 0              | 1.972666                | -1.396453 | -2.425381 |
| 5                | 6                | 0              | 3.421572                | -2.737826 | -0.934823 |
| 6                | 6                | 0              | 0.747517                | -0.310689 | 0.265604  |
| 7                | 6                | 0              | 3.249687                | 0.216019  | -0.413290 |
| 8                | 6                | 0              | 3.206766                | -0.543741 | -2.795353 |
| 9                | 6                | 0              | 4.645982                | -1.796497 | -1.164496 |
| 10               | 6                | 0              | 0.735386                | 0.714000  | 1.400432  |
| 11               | 6                | 0              | 4.099075                | -0.391519 | -1.548891 |
| 12               | 6                | 0              | 0.866682                | 0.293051  | 2.704722  |
| 13               | 6                | 0              | 0.612988                | 2.118877  | 1.155381  |
| 14               | 6                | 0              | 0.876055                | 1.230559  | 3.762229  |
| 15               | 6                | 0              | 0.634465                | 2.979375  | 2.305148  |
| 16               | 7                | 0              | 0.767188                | 2.524971  | 3.578883  |
| 17               | 1                | 0              | 1.041162                | -0.833990 | -2.442842 |
| 18               | 1                | 0              | 1.846920                | -2.265446 | -3.071345 |
| 19               | 1                | 0              | 3.355713                | -3.524632 | -1.686669 |
| 20               | 1                | 0              | 3.442248                | -3.205114 | 0.049926  |
| 21               | 1                | 0              | 0.392878                | 0.167449  | -0.645944 |
| 22               | 1                | 0              | 3.865867                | 0.493270  | 0.441680  |
| 23               | 1                | 0              | 2.774900                | 1.133930  | -0.765938 |
| 24               | 1                | 0              | 3.764792                | -1.015983 | -3.606372 |
| 25               | 1                | 0              | 2.886888                | 0.436169  | -3.153880 |
| 26               | 1                | 0              | 5.202817                | -2.172901 | -2.026326 |
| 27               | 1                | 0              | 4.940640                | 0.264811  | -1.772026 |
| 28               | 1                | 0              | 0.952822                | -0.759674 | 2.955408  |
| 29               | 6                | 0              | 0.468255                | 2.706913  | -0.121880 |
| 30               | 1                | 0              | 0.976675                | 0.886401  | 4.787866  |
| 31               | 6                | 0              | 0.509947                | 4.377441  | 2.115731  |
| 32               | 6                | 0              | -3.524609               | -0.311406 | -0.684405 |
| 33               | 6                | 0              | -2.147127               | -0.362818 | -0.244454 |
| 34               | 6                | 0              | -1.504309               | -1.455747 | 0.228472  |
| 35               | 7                | 0              | -0.090540               | -1.499695 | 0.460428  |
| 36               | 1                | 0              | -4.089102               | -1.237831 | -0.686081 |

|    |   |   |           |           |           |
|----|---|---|-----------|-----------|-----------|
| 37 | 1 | 0 | -1.603539 | 0.572718  | -0.327112 |
| 38 | 1 | 0 | 0.095819  | -1.953981 | 1.350452  |
| 39 | 6 | 0 | -4.130045 | 0.824427  | -1.086781 |
| 40 | 6 | 0 | -5.511455 | 0.947060  | -1.573680 |
| 41 | 6 | 0 | 0.370627  | 4.923386  | 0.865257  |
| 42 | 6 | 0 | 0.347825  | 4.077764  | -0.273665 |
| 43 | 1 | 0 | 0.528020  | 4.999800  | 3.001576  |
| 44 | 1 | 0 | 0.276619  | 5.995054  | 0.756663  |
| 45 | 8 | 0 | 0.213186  | 4.524610  | -1.545180 |
| 46 | 1 | 0 | 0.432600  | 2.117619  | -1.028977 |
| 47 | 6 | 0 | 0.061368  | 5.925744  | -1.785134 |
| 48 | 1 | 0 | 0.939776  | 6.484670  | -1.449097 |
| 49 | 1 | 0 | -0.038594 | 6.026430  | -2.863582 |
| 50 | 1 | 0 | -0.837687 | 6.317223  | -1.300367 |
| 51 | 6 | 0 | -6.144230 | -0.045026 | -2.215502 |
| 52 | 6 | 0 | -2.164478 | -2.750172 | 0.544584  |
| 53 | 6 | 0 | -1.686764 | -3.958384 | 0.015261  |
| 54 | 6 | 0 | -3.264457 | -2.789529 | 1.413490  |
| 55 | 6 | 0 | -2.298787 | -5.167139 | 0.330898  |
| 56 | 1 | 0 | -0.851396 | -3.947834 | -0.676669 |
| 57 | 6 | 0 | -3.873156 | -3.999991 | 1.733255  |
| 58 | 1 | 0 | -3.633140 | -1.866508 | 1.844611  |
| 59 | 6 | 0 | -3.393472 | -5.191174 | 1.193340  |
| 60 | 1 | 0 | -1.928552 | -6.089817 | -0.101205 |
| 61 | 1 | 0 | -4.720715 | -4.012073 | 2.408511  |
| 62 | 1 | 0 | -3.869911 | -6.132353 | 1.441105  |
| 63 | 6 | 0 | 6.870860  | -2.099544 | -0.050253 |
| 64 | 1 | 0 | 7.507920  | -2.069418 | 0.825481  |
| 65 | 6 | 0 | 5.581121  | -1.785982 | 0.017591  |
| 66 | 1 | 0 | 5.157173  | -1.500314 | 0.978971  |
| 67 | 6 | 0 | -6.174272 | 2.282786  | -1.327809 |
| 68 | 1 | 0 | -5.601631 | 3.092060  | -1.794569 |
| 69 | 1 | 0 | -7.186753 | 2.307265  | -1.732265 |
| 70 | 1 | 0 | -3.569087 | 1.756424  | -1.020986 |
| 71 | 1 | 0 | 7.339293  | -2.396616 | -0.983536 |
| 72 | 1 | 0 | -6.225926 | 2.505781  | -0.257025 |
| 73 | 1 | 0 | -7.169616 | 0.064906  | -2.548532 |
| 74 | 1 | 0 | -5.655462 | -0.985500 | -2.441951 |
| 75 | 1 | 0 | 2.514982  | -1.324078 | 0.937652  |

-----

**K-B**

Energy + zep (gas) = -1519.34174 au

Gibbs free energy (gas) = -1519.41175 au

Gibbs free energy (in solvent) = -1519.84142 au

Zero-point correction = 0.64149 au

Thermal correction to Gibbs free energy = 0.57148 au

Standard orientation:

| Center<br>Number | Atomic<br>Number | Atomic<br>Type | Coordinates (Angstroms) |           |           |
|------------------|------------------|----------------|-------------------------|-----------|-----------|
|                  |                  |                | X                       | Y         | Z         |
| 1                | 7                | 0              | 0.148961                | 2.369739  | -0.765447 |
| 2                | 6                | 0              | -0.825304               | 1.886969  | 0.230230  |
| 3                | 6                | 0              | -0.261333               | 2.013599  | -2.142982 |
| 4                | 6                | 0              | 0.200549                | 3.842434  | -0.658750 |
| 5                | 6                | 0              | -0.635752               | 0.371055  | 0.508146  |
| 6                | 6                | 0              | -2.277681               | 2.270852  | -0.176480 |
| 7                | 6                | 0              | -1.611329               | 2.682254  | -2.536980 |
| 8                | 6                | 0              | -1.216534               | 4.496731  | -0.863065 |
| 9                | 6                | 0              | -1.668509               | -0.199233 | 1.471597  |
| 10               | 6                | 0              | -2.184093               | 3.350741  | -1.275337 |
| 11               | 6                | 0              | -1.802370               | 0.338282  | 2.733269  |
| 12               | 6                | 0              | -2.508334               | -1.301525 | 1.116303  |
| 13               | 6                | 0              | -2.734552               | -0.204565 | 3.646757  |
| 14               | 6                | 0              | -3.419444               | -1.770293 | 2.123348  |
| 15               | 7                | 0              | -3.513688               | -1.221091 | 3.363109  |
| 16               | 1                | 0              | -0.322072               | 0.926568  | -2.224754 |
| 17               | 1                | 0              | 0.545533                | 2.323385  | -2.810628 |
| 18               | 1                | 0              | 0.905730                | 4.211045  | -1.406984 |
| 19               | 1                | 0              | 0.607591                | 4.104515  | 0.321524  |
| 20               | 1                | 0              | -0.665093               | -0.162317 | -0.435041 |
| 21               | 1                | 0              | -2.837819               | 2.621545  | 0.691628  |
| 22               | 1                | 0              | -2.824266               | 1.408043  | -0.570581 |
| 23               | 1                | 0              | -1.465051               | 3.426117  | -3.324925 |
| 24               | 1                | 0              | -2.314581               | 1.940020  | -2.924965 |
| 25               | 1                | 0              | -1.165624               | 5.193378  | -1.705442 |
| 26               | 1                | 0              | -3.174354               | 3.764839  | -1.473985 |
| 27               | 1                | 0              | -1.211437               | 1.192194  | 3.050816  |
| 28               | 6                | 0              | -2.507397               | -1.942823 | -0.142638 |
| 29               | 1                | 0              | -2.830889               | 0.225873  | 4.639805  |
| 30               | 6                | 0              | -4.272101               | -2.859300 | 1.820109  |
| 31               | 6                | 0              | -4.247969               | -3.469201 | 0.591476  |
| 32               | 6                | 0              | -3.353180               | -3.005557 | -0.406798 |
| 33               | 1                | 0              | -4.948206               | -3.189844 | 2.598530  |
| 34               | 1                | 0              | -4.913803               | -4.297701 | 0.392486  |
| 35               | 8                | 0              | -3.257866               | -3.546154 | -1.647187 |
| 36               | 1                | 0              | -1.860509               | -1.625870 | -0.949286 |

|    |   |   |           |           |           |
|----|---|---|-----------|-----------|-----------|
| 37 | 6 | 0 | -4.137868 | -4.609367 | -2.016612 |
| 38 | 1 | 0 | -5.184876 | -4.297629 | -1.958723 |
| 39 | 1 | 0 | -3.890443 | -4.846846 | -3.049021 |
| 40 | 1 | 0 | -3.978145 | -5.494610 | -1.393618 |
| 41 | 6 | 0 | -2.010482 | 6.560343  | 0.332253  |
| 42 | 1 | 0 | -2.333025 | 7.071437  | 1.231966  |
| 43 | 6 | 0 | -1.675595 | 5.273189  | 0.340499  |
| 44 | 1 | 0 | -1.724328 | 4.729886  | 1.283995  |
| 45 | 1 | 0 | -1.975252 | 7.151353  | -0.577974 |
| 46 | 1 | 0 | -0.577625 | 2.408158  | 1.161426  |
| 47 | 7 | 0 | 0.714125  | 0.163449  | 1.079539  |
| 48 | 1 | 0 | 0.804585  | 0.487581  | 2.036671  |
| 49 | 6 | 0 | 1.841919  | -0.178847 | 0.481846  |
| 50 | 6 | 0 | 1.822690  | -0.803899 | -0.861475 |
| 51 | 6 | 0 | 2.539238  | -0.231157 | -1.920616 |
| 52 | 6 | 0 | 1.122584  | -2.001666 | -1.063496 |
| 53 | 6 | 0 | 2.541972  | -0.845372 | -3.168992 |
| 54 | 6 | 0 | 1.141187  | -2.616383 | -2.311808 |
| 55 | 6 | 0 | 1.846923  | -2.037977 | -3.365657 |
| 56 | 6 | 0 | 4.266213  | -0.523435 | 0.826881  |
| 57 | 6 | 0 | 3.063031  | 0.004060  | 1.202975  |
| 58 | 6 | 0 | 5.473008  | -0.341863 | 1.564613  |
| 59 | 6 | 0 | 6.689780  | -0.862048 | 1.242485  |
| 60 | 6 | 0 | 7.875153  | -0.592201 | 2.119497  |
| 61 | 1 | 0 | 3.062835  | 0.704848  | -1.770326 |
| 62 | 1 | 0 | 0.584700  | -2.462090 | -0.243061 |
| 63 | 1 | 0 | 3.084519  | -0.390794 | -3.989327 |
| 64 | 1 | 0 | 0.602682  | -3.544831 | -2.458263 |
| 65 | 1 | 0 | 1.855662  | -2.515848 | -4.338092 |
| 66 | 1 | 0 | 4.298924  | -1.120469 | -0.076747 |
| 67 | 1 | 0 | 3.007105  | 0.577320  | 2.125061  |
| 68 | 1 | 0 | 5.405754  | 0.264094  | 2.464014  |
| 69 | 1 | 0 | 8.666460  | -0.094845 | 1.547455  |
| 70 | 1 | 0 | 8.304320  | -1.533992 | 2.479477  |
| 71 | 1 | 0 | 7.624998  | 0.027719  | 2.980279  |
| 72 | 6 | 0 | 6.966231  | -1.718904 | 0.043560  |
| 73 | 1 | 0 | 7.338933  | -2.696958 | 0.366717  |
| 74 | 1 | 0 | 6.105146  | -1.879910 | -0.601993 |
| 75 | 1 | 0 | 7.765151  | -1.270152 | -0.555964 |

---

**T-B**

Energy + zep (gas) = -1519.31553 au

Gibbs free energy (gas) = -1519.38429 au

Gibbs free energy (in solvent) = -1519.82615 au

Zero-point correction = 0.64340 au

Thermal correction to Gibbs free energy = 0.57464 au

Standard orientation:

| Center<br>Number | Atomic<br>Number | Atomic<br>Type | Coordinates (Angstroms) |           |           |
|------------------|------------------|----------------|-------------------------|-----------|-----------|
|                  |                  |                | X                       | Y         | Z         |
| 1                | 7                | 0              | 1.039351                | 1.655043  | -0.905233 |
| 2                | 6                | 0              | -0.177727               | 1.729064  | 0.026290  |
| 3                | 6                | 0              | 0.675561                | 1.170376  | -2.294465 |
| 4                | 6                | 0              | 1.677126                | 3.023462  | -0.991178 |
| 5                | 6                | 0              | -0.585688               | 0.319429  | 0.535043  |
| 6                | 6                | 0              | -1.269589               | 2.530008  | -0.715995 |
| 7                | 6                | 0              | -0.240133               | 2.216638  | -2.966349 |
| 8                | 6                | 0              | 0.627009                | 4.056458  | -1.501408 |
| 9                | 6                | 0              | -1.832281               | 0.439677  | 1.405377  |
| 10               | 6                | 0              | -0.646218               | 3.267253  | -1.917241 |
| 11               | 6                | 0              | -1.804676               | 1.227075  | 2.535691  |
| 12               | 6                | 0              | -3.042549               | -0.259761 | 1.100274  |
| 13               | 6                | 0              | -2.947070               | 1.334691  | 3.361506  |
| 14               | 6                | 0              | -4.142679               | -0.069129 | 2.004839  |
| 15               | 7                | 0              | -4.077428               | 0.718976  | 3.110493  |
| 16               | 1                | 0              | 0.206085                | 0.195840  | -2.183923 |
| 17               | 1                | 0              | 1.614889                | 1.022178  | -2.826529 |
| 18               | 1                | 0              | 2.532703                | 2.936196  | -1.661267 |
| 19               | 1                | 0              | 2.047270                | 3.268430  | 0.004426  |
| 20               | 1                | 0              | -0.815564               | -0.300285 | -0.330407 |
| 21               | 1                | 0              | -1.743013               | 3.223034  | -0.021128 |
| 22               | 1                | 0              | -2.057528               | 1.859823  | -1.070747 |
| 23               | 1                | 0              | 0.274599                | 2.692709  | -3.803777 |
| 24               | 1                | 0              | -1.125662               | 1.723487  | -3.371005 |
| 25               | 1                | 0              | 1.027609                | 4.522640  | -2.405225 |
| 26               | 1                | 0              | -1.369979               | 3.962279  | -2.343708 |
| 27               | 1                | 0              | -0.913702               | 1.777156  | 2.822837  |
| 28               | 6                | 0              | -3.223553               | -1.111624 | -0.011792 |
| 29               | 1                | 0              | -2.912865               | 1.955531  | 4.252681  |
| 30               | 6                | 0              | -5.364619               | -0.735184 | 1.744475  |
| 31               | 6                | 0              | -5.516110               | -1.556137 | 0.656108  |
| 32               | 6                | 0              | -4.429976               | -1.752117 | -0.235280 |
| 33               | 1                | 0              | -6.175854               | -0.571879 | 2.442715  |
| 34               | 1                | 0              | -6.462288               | -2.051787 | 0.487929  |
| 35               | 8                | 0              | -4.484809               | -2.550400 | -1.329154 |
| 36               | 1                | 0              | -2.428229               | -1.315731 | -0.716102 |

|    |   |   |           |           |           |
|----|---|---|-----------|-----------|-----------|
| 37 | 6 | 0 | -5.691635 | -3.257341 | -1.621554 |
| 38 | 1 | 0 | -6.521680 | -2.569228 | -1.807648 |
| 39 | 1 | 0 | -5.484769 | -3.823764 | -2.526944 |
| 40 | 1 | 0 | -5.954468 | -3.948050 | -0.814806 |
| 41 | 6 | 0 | 0.530910  | 6.446191  | -0.751655 |
| 42 | 1 | 0 | 0.325155  | 7.200637  | -0.001885 |
| 43 | 6 | 0 | 0.370028  | 5.151552  | -0.497840 |
| 44 | 1 | 0 | 0.030497  | 4.846652  | 0.490712  |
| 45 | 1 | 0 | 0.871978  | 6.801197  | -1.719310 |
| 46 | 1 | 0 | 1.710523  | 0.990893  | -0.488022 |
| 47 | 1 | 0 | 0.190189  | 2.297147  | 0.883229  |
| 48 | 7 | 0 | 0.478283  | -0.354850 | 1.282008  |
| 49 | 1 | 0 | 0.636139  | 0.032424  | 2.202434  |
| 50 | 6 | 0 | 1.638038  | -0.881372 | 0.668731  |
| 51 | 6 | 0 | 1.400719  | -1.909249 | -0.377191 |
| 52 | 6 | 0 | 2.205864  | -1.995800 | -1.525229 |
| 53 | 6 | 0 | 0.349656  | -2.829512 | -0.228644 |
| 54 | 6 | 0 | 1.974982  | -2.975778 | -2.486236 |
| 55 | 6 | 0 | 0.121544  | -3.808423 | -1.190669 |
| 56 | 6 | 0 | 0.932018  | -3.885673 | -2.322334 |
| 57 | 6 | 0 | 4.140219  | -1.158911 | 0.901568  |
| 58 | 6 | 0 | 2.868992  | -0.518274 | 1.142008  |
| 59 | 6 | 0 | 5.302524  | -0.702465 | 1.415878  |
| 60 | 6 | 0 | 6.632376  | -1.299731 | 1.238796  |
| 61 | 6 | 0 | 6.965542  | -2.019405 | 0.157631  |
| 62 | 6 | 0 | 7.621616  | -1.031291 | 2.348940  |
| 63 | 1 | 0 | 3.020704  | -1.294340 | -1.666163 |
| 64 | 1 | 0 | -0.269249 | -2.783164 | 0.658954  |
| 65 | 1 | 0 | 2.610088  | -3.030050 | -3.362948 |
| 66 | 1 | 0 | -0.686353 | -4.517180 | -1.051606 |
| 67 | 1 | 0 | 0.754320  | -4.650378 | -3.069140 |
| 68 | 1 | 0 | 4.145688  | -2.070597 | 0.314158  |
| 69 | 1 | 0 | 2.887016  | 0.288871  | 1.874817  |
| 70 | 1 | 0 | 5.265249  | 0.176156  | 2.059853  |
| 71 | 1 | 0 | 6.276059  | -2.178323 | -0.663511 |
| 72 | 1 | 0 | 7.949283  | -2.462507 | 0.058571  |
| 73 | 1 | 0 | 7.775070  | 0.045268  | 2.482133  |
| 74 | 1 | 0 | 8.589571  | -1.487795 | 2.140290  |
| 75 | 1 | 0 | 7.256235  | -1.422658 | 3.303835  |

---

**2-1-COM-endo**

Energy + zep (gas) = -2109.81740 au

Gibbs free energy (gas) = -2109.90645 au

Gibbs free energy (in solvent) = -2109.15045 au

Zero-point correction = 0.79334 au

Thermal correction to Gibbs free energy = 0.70429 au

Standard orientation:

| Center<br>Number | Atomic<br>Number | Atomic<br>Type | Coordinates (Angstroms) |           |           |
|------------------|------------------|----------------|-------------------------|-----------|-----------|
|                  |                  |                | X                       | Y         | Z         |
| 1                | 7                | 0              | -0.185144               | -1.611365 | -0.559098 |
| 2                | 6                | 0              | 1.298796                | -1.459148 | -0.866200 |
| 3                | 6                | 0              | -1.059054               | -1.450574 | -1.782319 |
| 4                | 6                | 0              | -0.423623               | -2.971829 | 0.051451  |
| 5                | 6                | 0              | 1.654574                | 0.035535  | -1.049902 |
| 6                | 6                | 0              | 1.627387                | -2.385344 | -2.055621 |
| 7                | 6                | 0              | -0.753880               | -2.597088 | -2.771806 |
| 8                | 6                | 0              | 0.077808                | -4.075786 | -0.926860 |
| 9                | 6                | 0              | 3.124208                | 0.245232  | -1.405071 |
| 10               | 6                | 0              | 0.469051                | -3.381016 | -2.261719 |
| 11               | 6                | 0              | 3.431347                | 0.794060  | -2.629661 |
| 12               | 6                | 0              | 4.208848                | -0.074454 | -0.521659 |
| 13               | 6                | 0              | 4.776719                | 1.023316  | -3.000450 |
| 14               | 6                | 0              | 5.533400                | 0.201041  | -1.003082 |
| 15               | 7                | 0              | 5.794574                | 0.737969  | -2.225556 |
| 16               | 1                | 0              | -0.860217               | -0.463842 | -2.195737 |
| 17               | 1                | 0              | -2.085175               | -1.457580 | -1.419976 |
| 18               | 1                | 0              | -1.490658               | -3.039916 | 0.256483  |
| 19               | 1                | 0              | 0.108909                | -2.990777 | 1.002431  |
| 20               | 1                | 0              | 1.084926                | 0.392200  | -1.906176 |
| 21               | 1                | 0              | 2.570577                | -2.898142 | -1.866507 |
| 22               | 1                | 0              | 1.771104                | -1.800875 | -2.968543 |
| 23               | 1                | 0              | -1.618280               | -3.258146 | -2.863446 |
| 24               | 1                | 0              | -0.554092               | -2.189176 | -3.764571 |
| 25               | 1                | 0              | -0.762791               | -4.740743 | -1.142317 |
| 26               | 1                | 0              | 0.756829                | -4.141768 | -2.988128 |
| 27               | 1                | 0              | 2.644660                | 1.066560  | -3.324787 |
| 28               | 6                | 0              | 4.074237                | -0.623719 | 0.775202  |
| 29               | 1                | 0              | 5.003452                | 1.457673  | -3.970310 |
| 30               | 6                | 0              | 6.641665                | -0.092397 | -0.172096 |
| 31               | 6                | 0              | 0.567719                | 2.051927  | 0.047289  |
| 32               | 7                | 0              | 1.205894                | 0.787201  | 0.127559  |
| 33               | 1                | 0              | 1.894698                | 0.783600  | 0.869331  |
| 34               | 6                | 0              | 6.482601                | -0.627776 | 1.080993  |
| 35               | 6                | 0              | 5.178590                | -0.898199 | 1.564762  |
| 36               | 1                | 0              | 7.625249                | 0.127790  | -0.567694 |
| 37               | 1                | 0              | 7.351547                | -0.836083 | 1.689754  |
| 38               | 8                | 0              | 4.917068                | -1.426243 | 2.785480  |
| 39               | 1                | 0              | 3.112221                | -0.847816 | 1.215870  |
| 40               | 6                | 0              | 6.000593                | -1.700001 | 3.676125  |
| 41               | 1                | 0              | 6.554082                | -0.788656 | 3.920640  |
| 42               | 1                | 0              | 5.541794                | -2.095911 | 4.579530  |
| 43               | 1                | 0              | 6.680969                | -2.448005 | 3.258148  |
| 44               | 6                | 0              | 0.519400                | 2.731273  | 1.371446  |
| 45               | 6                | 0              | 0.131953                | 2.031026  | 2.525568  |
| 46               | 6                | 0              | 0.919378                | 4.069237  | 1.502139  |
| 47               | 6                | 0              | 0.125571                | 2.659041  | 3.768726  |
| 48               | 1                | 0              | -0.185922               | 0.998489  | 2.440407  |
| 49               | 6                | 0              | 0.912695                | 4.693349  | 2.746177  |

|    |   |   |           |           |           |
|----|---|---|-----------|-----------|-----------|
| 50 | 1 | 0 | 1.255813  | 4.611521  | 0.627011  |
| 51 | 6 | 0 | 0.513969  | 3.992527  | 3.882623  |
| 52 | 1 | 0 | -0.182809 | 2.106737  | 4.649355  |
| 53 | 1 | 0 | 1.231532  | 5.725885  | 2.829147  |
| 54 | 1 | 0 | 0.513425  | 4.479583  | 4.850697  |
| 55 | 6 | 0 | 1.139620  | -6.234748 | -0.220368 |
| 56 | 1 | 0 | 1.962389  | -6.795183 | 0.207193  |
| 57 | 6 | 0 | 1.182111  | -4.910898 | -0.330620 |
| 58 | 1 | 0 | 2.063330  | -4.380272 | 0.026411  |
| 59 | 1 | 0 | 0.281216  | -6.808689 | -0.556017 |
| 60 | 1 | 0 | -0.459145 | -0.889733 | 0.123400  |
| 61 | 6 | 0 | -0.818078 | 3.737622  | -1.178236 |
| 62 | 6 | 0 | 0.023911  | 2.566347  | -1.084780 |
| 63 | 1 | 0 | -1.100936 | 4.227929  | -0.252624 |
| 64 | 1 | 0 | 0.194444  | 2.058634  | -2.029370 |
| 65 | 6 | 0 | -1.293829 | 4.228088  | -2.342002 |
| 66 | 6 | 0 | -2.155860 | 5.406862  | -2.506608 |
| 67 | 6 | 0 | -2.175257 | 6.428101  | -1.638007 |
| 68 | 6 | 0 | -3.014472 | 5.416231  | -3.750728 |
| 69 | 1 | 0 | -3.689645 | 4.553927  | -3.772218 |
| 70 | 1 | 0 | -3.616084 | 6.323510  | -3.816211 |
| 71 | 1 | 0 | -1.042676 | 3.700030  | -3.261919 |
| 72 | 1 | 0 | -2.392454 | 5.356493  | -4.650787 |
| 73 | 1 | 0 | -1.522651 | 6.460888  | -0.773264 |
| 74 | 1 | 0 | -2.835828 | 7.275040  | -1.781335 |
| 75 | 1 | 0 | 1.789032  | -1.825048 | 0.034497  |
| 76 | 6 | 0 | -3.257742 | 0.088834  | 1.297213  |
| 77 | 6 | 0 | -3.497970 | 1.472266  | 1.815885  |
| 78 | 6 | 0 | -4.811707 | 1.676876  | 1.902710  |
| 79 | 6 | 0 | -5.528051 | 0.442382  | 1.446951  |
| 80 | 7 | 0 | -4.502854 | -0.490527 | 1.104768  |
| 81 | 8 | 0 | -2.183051 | -0.441740 | 1.069758  |
| 82 | 8 | 0 | -6.705575 | 0.241189  | 1.362442  |
| 83 | 6 | 0 | -4.740485 | -1.817643 | 0.628202  |
| 84 | 6 | 0 | -4.262609 | -2.910048 | 1.353600  |
| 85 | 6 | 0 | -5.469104 | -2.010962 | -0.545207 |
| 86 | 6 | 0 | -4.500731 | -4.201234 | 0.888739  |
| 87 | 6 | 0 | -5.226800 | -4.401158 | -0.284840 |
| 88 | 6 | 0 | -5.714599 | -3.306187 | -0.995316 |
| 89 | 1 | 0 | -4.141733 | -5.050772 | 1.458040  |
| 90 | 1 | 0 | -3.728813 | -2.747419 | 2.282046  |
| 91 | 1 | 0 | -5.427663 | -5.407155 | -0.633849 |
| 92 | 1 | 0 | -6.295294 | -3.457616 | -1.897441 |
| 93 | 1 | 0 | -5.857112 | -1.157277 | -1.086456 |
| 94 | 1 | 0 | -2.682265 | 2.140535  | 2.048987  |
| 95 | 1 | 0 | -5.348581 | 2.555194  | 2.229287  |

---

### 2-1-TS-endo

Energy + zep (gas) = -2109.79910 au

Gibbs free energy (gas) = -2109.8798 au

Gibbs free energy (in solvent) = -2109.13113 au

Zero-point correction = 0.79425 au

Thermal correction to Gibbs free energy = 0.71359 au

Standard orientation:

---



| Center<br>Number | Atomic<br>Number | Atomic<br>Type | Coordinates (Angstroms) |           |           |
|------------------|------------------|----------------|-------------------------|-----------|-----------|
|                  |                  |                | X                       | Y         | Z         |
| 1                | 7                | 0              | -0.169257               | -1.746212 | -0.337687 |
| 2                | 6                | 0              | -1.606283               | -1.427400 | 0.056835  |
| 3                | 6                | 0              | 0.555340                | -2.534997 | 0.731981  |
| 4                | 6                | 0              | -0.185324               | -2.544148 | -1.623711 |
| 5                | 6                | 0              | -1.692425               | -0.210096 | 1.023607  |
| 6                | 6                | 0              | -2.232014               | -2.745546 | 0.564883  |
| 7                | 6                | 0              | -0.064609               | -3.942642 | 0.832136  |
| 8                | 6                | 0              | -1.077455               | -3.808647 | -1.450625 |
| 9                | 6                | 0              | -3.008587               | -0.145950 | 1.794660  |
| 10               | 6                | 0              | -1.398537               | -3.941945 | 0.063773  |
| 11               | 6                | 0              | -2.973354               | -0.240541 | 3.167134  |
| 12               | 6                | 0              | -4.282538               | 0.040978  | 1.164669  |
| 13               | 6                | 0              | -4.166337               | -0.161622 | 3.923252  |
| 14               | 6                | 0              | -5.425188               | 0.109906  | 2.030800  |
| 15               | 7                | 0              | -5.349863               | 0.005392  | 3.384809  |
| 16               | 1                | 0              | 0.461054                | -1.973923 | 1.661062  |
| 17               | 1                | 0              | 1.604645                | -2.532102 | 0.447149  |
| 18               | 1                | 0              | 0.853740                | -2.780669 | -1.846621 |
| 19               | 1                | 0              | -0.553414               | -1.878890 | -2.404858 |
| 20               | 1                | 0              | -0.913179               | -0.321849 | 1.776802  |
| 21               | 1                | 0              | -3.266613               | -2.799934 | 0.225956  |
| 22               | 1                | 0              | -2.264083               | -2.761323 | 1.657430  |
| 23               | 1                | 0              | 0.615080                | -4.690735 | 0.417900  |
| 24               | 1                | 0              | -0.227531               | -4.201941 | 1.880102  |
| 25               | 1                | 0              | -0.480929               | -4.679609 | -1.734589 |
| 26               | 1                | 0              | -1.939761               | -4.872668 | 0.236439  |
| 27               | 1                | 0              | -2.031127               | -0.370093 | 3.688775  |
| 28               | 6                | 0              | -4.490704               | 0.165663  | -0.228740 |
| 29               | 1                | 0              | -4.125085               | -0.238369 | 5.006274  |
| 30               | 6                | 0              | -6.707604               | 0.295471  | 1.459746  |
| 31               | 6                | 0              | -0.363549               | 1.883963  | 0.422673  |
| 32               | 7                | 0              | -1.453512               | 1.046050  | 0.304602  |
| 33               | 1                | 0              | -2.292568               | 1.507154  | -0.018452 |
| 34               | 6                | 0              | -6.883013               | 0.413317  | 0.104142  |
| 35               | 6                | 0              | -5.758588               | 0.347817  | -0.756557 |
| 36               | 1                | 0              | -7.548279               | 0.342238  | 2.140532  |
| 37               | 1                | 0              | -7.876848               | 0.555696  | -0.297196 |
| 38               | 8                | 0              | -5.829684               | 0.450562  | -2.105187 |
| 39               | 1                | 0              | -3.677214               | 0.129503  | -0.940992 |
| 40               | 6                | 0              | -7.099136               | 0.670932  | -2.725373 |
| 41               | 1                | 0              | -7.547769               | 1.609826  | -2.388288 |

|    |   |   |           |           |           |
|----|---|---|-----------|-----------|-----------|
| 42 | 1 | 0 | -6.894831 | 0.731580  | -3.792015 |
| 43 | 1 | 0 | -7.784558 | -0.159970 | -2.534372 |
| 44 | 6 | 0 | -0.504872 | 3.124866  | -0.388447 |
| 45 | 6 | 0 | -0.847881 | 3.051158  | -1.746730 |
| 46 | 6 | 0 | -0.336363 | 4.384917  | 0.202288  |
| 47 | 6 | 0 | -1.002299 | 4.211618  | -2.499598 |
| 48 | 1 | 0 | -0.971066 | 2.082613  | -2.217922 |
| 49 | 6 | 0 | -0.502323 | 5.543111  | -0.551656 |
| 50 | 1 | 0 | -0.096259 | 4.452227  | 1.256583  |
| 51 | 6 | 0 | -0.831874 | 5.459476  | -1.903147 |
| 52 | 1 | 0 | -1.253755 | 4.141694  | -3.551427 |
| 53 | 1 | 0 | -0.381009 | 6.511553  | -0.080814 |
| 54 | 1 | 0 | -0.958536 | 6.362754  | -2.488168 |
| 55 | 6 | 0 | -2.594711 | -4.725863 | -3.223408 |
| 56 | 1 | 0 | -3.489448 | -4.670870 | -3.831956 |
| 57 | 6 | 0 | -2.299631 | -3.784348 | -2.332849 |
| 58 | 1 | 0 | -2.974673 | -2.937289 | -2.221030 |
| 59 | 1 | 0 | -1.953084 | -5.588077 | -3.376985 |
| 60 | 1 | 0 | 0.413947  | -0.906767 | -0.527326 |
| 61 | 6 | 0 | 1.996092  | 2.300912  | 1.012420  |
| 62 | 6 | 0 | 0.764014  | 1.600041  | 1.150963  |
| 63 | 1 | 0 | 2.013485  | 3.135325  | 0.325908  |
| 64 | 1 | 0 | 0.778887  | 0.723896  | 1.790466  |
| 65 | 6 | 0 | 3.141314  | 2.003473  | 1.729977  |
| 66 | 6 | 0 | 4.433587  | 2.488195  | 1.438298  |
| 67 | 6 | 0 | 4.679614  | 3.302035  | 0.323696  |
| 68 | 6 | 0 | 5.606723  | 2.001382  | 2.252579  |
| 69 | 1 | 0 | 5.329246  | 1.187866  | 2.924854  |
| 70 | 1 | 0 | 6.417886  | 1.655659  | 1.605404  |
| 71 | 1 | 0 | 3.063091  | 1.262170  | 2.521878  |
| 72 | 1 | 0 | 6.008677  | 2.817714  | 2.861764  |
| 73 | 1 | 0 | 3.912100  | 3.978154  | -0.030555 |
| 74 | 1 | 0 | 5.694358  | 3.650650  | 0.165049  |
| 75 | 1 | 0 | -2.076800 | -1.135907 | -0.880340 |
| 76 | 6 | 0 | 3.066816  | 0.261279  | -1.014125 |
| 77 | 6 | 0 | 3.126521  | 1.619601  | -1.478380 |
| 78 | 6 | 0 | 4.432587  | 2.088721  | -1.367838 |
| 79 | 6 | 0 | 5.289409  | 0.920053  | -0.962362 |
| 80 | 7 | 0 | 4.384496  | -0.118264 | -0.658730 |
| 81 | 8 | 0 | 2.105085  | -0.514905 | -0.942881 |
| 82 | 8 | 0 | 6.490277  | 0.851669  | -0.884378 |
| 83 | 6 | 0 | 4.774224  | -1.409607 | -0.193594 |
| 84 | 6 | 0 | 5.633696  | -2.195950 | -0.960902 |
| 85 | 6 | 0 | 4.317133  | -1.873827 | 1.041078  |

|    |   |   |          |           |           |
|----|---|---|----------|-----------|-----------|
| 86 | 6 | 0 | 6.026876 | -3.447415 | -0.493999 |
| 87 | 6 | 0 | 5.559704 | -3.920890 | 0.730219  |
| 88 | 6 | 0 | 4.704402 | -3.131619 | 1.497297  |
| 89 | 1 | 0 | 6.702418 | -4.051495 | -1.088067 |
| 90 | 1 | 0 | 6.000318 | -1.821541 | -1.907892 |
| 91 | 1 | 0 | 5.871738 | -4.893720 | 1.091543  |
| 92 | 1 | 0 | 4.358416 | -3.485586 | 2.462017  |
| 93 | 1 | 0 | 3.682223 | -1.237011 | 1.644833  |
| 94 | 1 | 0 | 2.281760 | 2.117250  | -1.926677 |
| 95 | 1 | 0 | 4.869762 | 2.852427  | -1.995969 |

### 2-1-IM-endo

Energy + zep (gas) = -2109.85212 au

Gibbs free energy (gas) = -2109.93193 au

Gibbs free energy (in solvent) = -2109.19949 au

Zero-point correction = 0.79993 au

Thermal correction to Gibbs free energy = 0.72013 au

Standard orientation:

| Center<br>Number | Atomic<br>Number | Atomic<br>Type | Coordinates (Angstroms) |           |           |
|------------------|------------------|----------------|-------------------------|-----------|-----------|
|                  |                  |                | X                       | Y         | Z         |
| 1                | 7                | 0              | 0.167116                | 1.737945  | 0.111508  |
| 2                | 6                | 0              | 1.625973                | 1.388927  | 0.403971  |
| 3                | 6                | 0              | -0.557783               | 2.250361  | 1.339473  |
| 4                | 6                | 0              | 0.130160                | 2.794921  | -0.971414 |
| 5                | 6                | 0              | 1.778147                | -0.008904 | 1.071714  |
| 6                | 6                | 0              | 2.221791                | 2.587029  | 1.173906  |
| 7                | 6                | 0              | 0.028660                | 3.620206  | 1.739447  |
| 8                | 6                | 0              | 0.981593                | 4.023891  | -0.537643 |
| 9                | 6                | 0              | 3.144409                | -0.181412 | 1.729109  |
| 10               | 6                | 0              | 1.339432                | 3.832675  | 0.962284  |
| 11               | 6                | 0              | 3.205416                | -0.346255 | 3.094247  |
| 12               | 6                | 0              | 4.375937                | -0.193922 | 0.994381  |
| 13               | 6                | 0              | 4.451746                | -0.506750 | 3.743730  |
| 14               | 6                | 0              | 5.580735                | -0.354937 | 1.758686  |
| 15               | 7                | 0              | 5.599754                | -0.505540 | 3.110601  |
| 16               | 1                | 0              | -0.432269               | 1.502630  | 2.121178  |
| 17               | 1                | 0              | -1.611879               | 2.286411  | 1.073630  |
| 18               | 1                | 0              | -0.919799               | 3.037945  | -1.126873 |
| 19               | 1                | 0              | 0.509148                | 2.328232  | -1.880553 |
| 20               | 1                | 0              | 1.048321                | -0.084523 | 1.882441  |
| 21               | 1                | 0              | 3.244084                | 2.751236  | 0.832972  |

|    |   |   |           |           |           |
|----|---|---|-----------|-----------|-----------|
| 22 | 1 | 0 | 2.284481  | 2.366735  | 2.242881  |
| 23 | 1 | 0 | -0.681219 | 4.420542  | 1.518851  |
| 24 | 1 | 0 | 0.214483  | 3.641585  | 2.814904  |
| 25 | 1 | 0 | 0.348292  | 4.912059  | -0.610170 |
| 26 | 1 | 0 | 1.855124  | 4.722806  | 1.323960  |
| 27 | 1 | 0 | 2.298974  | -0.358325 | 3.689786  |
| 28 | 6 | 0 | 4.483961  | -0.062461 | -0.409589 |
| 29 | 1 | 0 | 4.485322  | -0.636582 | 4.822057  |
| 30 | 6 | 0 | 6.824448  | -0.360185 | 1.082273  |
| 31 | 6 | 0 | 0.355048  | -1.859202 | 0.067879  |
| 32 | 7 | 0 | 1.526645  | -1.084596 | 0.105744  |
| 33 | 1 | 0 | 2.351292  | -1.630048 | -0.103054 |
| 34 | 6 | 0 | 6.903736  | -0.221277 | -0.280567 |
| 35 | 6 | 0 | 5.716675  | -0.072085 | -1.040890 |
| 36 | 1 | 0 | 7.714464  | -0.481540 | 1.686871  |
| 37 | 1 | 0 | 7.870651  | -0.231983 | -0.764379 |
| 38 | 8 | 0 | 5.693528  | 0.066545  | -2.389159 |
| 39 | 1 | 0 | 3.612521  | 0.020807  | -1.044458 |
| 40 | 6 | 0 | 6.921620  | 0.022862  | -3.118316 |
| 41 | 1 | 0 | 7.431031  | -0.935687 | -2.982427 |
| 42 | 1 | 0 | 6.643573  | 0.137700  | -4.163725 |
| 43 | 1 | 0 | 7.586718  | 0.842059  | -2.828864 |
| 44 | 6 | 0 | 0.510982  | -3.050236 | -0.823958 |
| 45 | 6 | 0 | 0.781341  | -2.885885 | -2.188435 |
| 46 | 6 | 0 | 0.436378  | -4.345943 | -0.297761 |
| 47 | 6 | 0 | 0.953362  | -3.995319 | -3.012895 |
| 48 | 1 | 0 | 0.850953  | -1.886579 | -2.603502 |
| 49 | 6 | 0 | 0.613323  | -5.453567 | -1.123086 |
| 50 | 1 | 0 | 0.251411  | -4.481309 | 0.761940  |
| 51 | 6 | 0 | 0.868836  | -5.280787 | -2.482053 |
| 52 | 1 | 0 | 1.154856  | -3.855872 | -4.068747 |
| 53 | 1 | 0 | 0.558774  | -6.451113 | -0.702891 |
| 54 | 1 | 0 | 1.006840  | -6.143633 | -3.122979 |
| 55 | 6 | 0 | 2.416314  | 5.369318  | -2.091561 |
| 56 | 1 | 0 | 3.295132  | 5.486154  | -2.714377 |
| 57 | 6 | 0 | 2.179121  | 4.243009  | -1.426871 |
| 58 | 1 | 0 | 2.884203  | 3.418750  | -1.518204 |
| 59 | 1 | 0 | 1.741333  | 6.218063  | -2.036711 |
| 60 | 1 | 0 | -0.373146 | 0.930065  | -0.240866 |
| 61 | 6 | 0 | -2.115964 | -2.255126 | 0.491782  |
| 62 | 6 | 0 | -0.797784 | -1.551567 | 0.692662  |
| 63 | 1 | 0 | -1.913865 | -3.285685 | 0.183445  |
| 64 | 1 | 0 | -0.836070 | -0.691699 | 1.352864  |
| 65 | 6 | 0 | -2.962186 | -2.302852 | 1.746045  |

|    |   |   |           |           |           |
|----|---|---|-----------|-----------|-----------|
| 66 | 6 | 0 | -4.206190 | -2.791977 | 1.712579  |
| 67 | 6 | 0 | -4.745386 | -3.237820 | 0.370305  |
| 68 | 6 | 0 | -5.089273 | -2.935260 | 2.917955  |
| 69 | 1 | 0 | -4.594073 | -2.587254 | 3.826437  |
| 70 | 1 | 0 | -6.020744 | -2.373420 | 2.789516  |
| 71 | 1 | 0 | -2.515906 | -1.978196 | 2.681613  |
| 72 | 1 | 0 | -5.375257 | -3.982619 | 3.066194  |
| 73 | 1 | 0 | -4.311414 | -4.205823 | 0.092055  |
| 74 | 1 | 0 | -5.828268 | -3.371650 | 0.400512  |
| 75 | 1 | 0 | 2.078874  | 1.322917  | -0.583018 |
| 76 | 6 | 0 | -3.098778 | -0.165154 | -0.693445 |
| 77 | 6 | 0 | -2.958468 | -1.678125 | -0.712405 |
| 78 | 6 | 0 | -4.411133 | -2.204192 | -0.726465 |
| 79 | 6 | 0 | -5.279874 | -0.962923 | -0.553828 |
| 80 | 7 | 0 | -4.432800 | 0.174710  | -0.609605 |
| 81 | 8 | 0 | -2.192526 | 0.655946  | -0.749611 |
| 82 | 8 | 0 | -6.467021 | -0.914750 | -0.392636 |
| 83 | 6 | 0 | -4.921039 | 1.524281  | -0.557241 |
| 84 | 6 | 0 | -4.655383 | 2.395838  | -1.612750 |
| 85 | 6 | 0 | -5.676547 | 1.940409  | 0.537213  |
| 86 | 6 | 0 | -5.143316 | 3.698664  | -1.563952 |
| 87 | 6 | 0 | -5.899563 | 4.123585  | -0.472785 |
| 88 | 6 | 0 | -6.167004 | 3.243275  | 0.573249  |
| 89 | 1 | 0 | -4.946996 | 4.376029  | -2.386804 |
| 90 | 1 | 0 | -4.083871 | 2.052005  | -2.465753 |
| 91 | 1 | 0 | -6.288835 | 5.134430  | -0.443708 |
| 92 | 1 | 0 | -6.765275 | 3.566087  | 1.416905  |
| 93 | 1 | 0 | -5.893085 | 1.247314  | 1.339424  |
| 94 | 1 | 0 | -2.423301 | -1.935063 | -1.629957 |
| 95 | 1 | 0 | -4.663252 | -2.624291 | -1.704782 |

---

## 2-2-COM-exo

Energy + zep (gas) = -2109.81795 au

Gibbs free energy (gas) = -2109.90805 au

Gibbs free energy (in solvent) = -2109.15351 au

Zero-point correction = 0.79279 au

Thermal correction to Gibbs free energy = 0.70269 au

Standard orientation:

---

| Center<br>Number | Atomic<br>Number | Atomic<br>Type | Coordinates (Angstroms) |           |           |
|------------------|------------------|----------------|-------------------------|-----------|-----------|
|                  |                  |                | X                       | Y         | Z         |
| 1                | 6                | 0              | 3.139761                | -0.644348 | -0.934817 |

---

|    |   |   |           |           |           |
|----|---|---|-----------|-----------|-----------|
| 2  | 6 | 0 | 4.885586  | -2.066784 | -1.392011 |
| 3  | 7 | 0 | 4.513046  | -0.728088 | -1.058905 |
| 4  | 8 | 0 | 2.510009  | 0.362761  | -0.644581 |
| 5  | 8 | 0 | 6.006693  | -2.456842 | -1.547205 |
| 6  | 6 | 0 | 5.439508  | 0.348853  | -0.875250 |
| 7  | 6 | 0 | 6.399571  | 0.265853  | 0.131269  |
| 8  | 6 | 0 | 5.389256  | 1.457605  | -1.719219 |
| 9  | 6 | 0 | 7.313209  | 1.303647  | 0.293680  |
| 10 | 6 | 0 | 7.261071  | 2.420818  | -0.536887 |
| 11 | 6 | 0 | 6.298301  | 2.496879  | -1.541881 |
| 12 | 1 | 0 | 8.067751  | 1.236220  | 1.068185  |
| 13 | 1 | 0 | 6.438431  | -0.607691 | 0.769731  |
| 14 | 1 | 0 | 7.975688  | 3.225163  | -0.408951 |
| 15 | 1 | 0 | 6.267332  | 3.356566  | -2.201026 |
| 16 | 1 | 0 | 4.658446  | 1.493414  | -2.518013 |
| 17 | 6 | 0 | 2.588186  | -2.007339 | -1.217870 |
| 18 | 6 | 0 | 3.599912  | -2.831255 | -1.486811 |
| 19 | 1 | 0 | 1.528795  | -2.216582 | -1.177803 |
| 20 | 1 | 0 | 3.581296  | -3.882903 | -1.731562 |
| 21 | 7 | 0 | 0.405880  | 2.135345  | -0.224854 |
| 22 | 6 | 0 | -0.889361 | 2.185547  | 0.576139  |
| 23 | 6 | 0 | 0.158976  | 2.125264  | -1.716696 |
| 24 | 6 | 0 | 1.259022  | 3.326072  | 0.139347  |
| 25 | 6 | 0 | -1.512666 | 0.773202  | 0.650596  |
| 26 | 6 | 0 | -1.746913 | 3.329639  | -0.005063 |
| 27 | 6 | 0 | -0.458830 | 3.475928  | -2.135858 |
| 28 | 6 | 0 | 0.452573  | 4.636765  | -0.113773 |
| 29 | 6 | 0 | -2.912035 | 0.822568  | 1.267744  |
| 30 | 6 | 0 | -0.853279 | 4.247762  | -0.864071 |
| 31 | 6 | 0 | -3.060594 | 0.985580  | 2.626293  |
| 32 | 6 | 0 | -4.096073 | 0.719237  | 0.470164  |
| 33 | 6 | 0 | -4.349654 | 1.050618  | 3.202776  |
| 34 | 6 | 0 | -5.352067 | 0.795273  | 1.161506  |
| 35 | 7 | 0 | -5.457894 | 0.962065  | 2.506359  |
| 36 | 1 | 0 | -0.493371 | 1.280166  | -1.929127 |
| 37 | 1 | 0 | 1.122660  | 1.922100  | -2.178886 |
| 38 | 1 | 0 | 2.165229  | 3.260095  | -0.461160 |
| 39 | 1 | 0 | 1.540348  | 3.209807  | 1.186111  |
| 40 | 1 | 0 | -1.593681 | 0.381496  | -0.361791 |
| 41 | 1 | 0 | -2.216732 | 3.877523  | 0.811456  |
| 42 | 1 | 0 | -2.557875 | 2.935191  | -0.621179 |
| 43 | 1 | 0 | 0.252159  | 4.055849  | -2.728651 |
| 44 | 1 | 0 | -1.335310 | 3.303273  | -2.763088 |
| 45 | 1 | 0 | 1.038501  | 5.265772  | -0.789101 |

|    |   |   |           |           |           |
|----|---|---|-----------|-----------|-----------|
| 46 | 1 | 0 | -1.396852 | 5.155780  | -1.126627 |
| 47 | 1 | 0 | -2.201560 | 1.054546  | 3.285796  |
| 48 | 6 | 0 | -4.111152 | 0.545437  | -0.932985 |
| 49 | 1 | 0 | -4.454148 | 1.178918  | 4.276721  |
| 50 | 6 | 0 | -6.551286 | 0.692277  | 0.415199  |
| 51 | 6 | 0 | -1.014561 | -3.534165 | -0.133494 |
| 52 | 6 | 0 | -1.193072 | -2.148728 | 0.240297  |
| 53 | 6 | 0 | -0.504303 | -1.478950 | 1.200169  |
| 54 | 7 | 0 | -0.549585 | -0.071422 | 1.352503  |
| 55 | 1 | 0 | -0.226489 | -4.092438 | 0.361816  |
| 56 | 1 | 0 | -1.937465 | -1.611598 | -0.339033 |
| 57 | 1 | 0 | -0.430650 | 0.194875  | 2.323063  |
| 58 | 6 | 0 | -1.748863 | -4.153120 | -1.082569 |
| 59 | 6 | 0 | -1.616518 | -5.551172 | -1.515608 |
| 60 | 6 | 0 | -6.538648 | 0.523677  | -0.946199 |
| 61 | 6 | 0 | -5.300529 | 0.447296  | -1.633812 |
| 62 | 1 | 0 | -7.482190 | 0.751321  | 0.965077  |
| 63 | 1 | 0 | -7.473160 | 0.447304  | -1.484655 |
| 64 | 8 | 0 | -5.188105 | 0.279687  | -2.974682 |
| 65 | 1 | 0 | -3.202005 | 0.468898  | -1.514909 |
| 66 | 6 | 0 | -6.370480 | 0.140490  | -3.764813 |
| 67 | 1 | 0 | -6.995486 | 1.036879  | -3.709235 |
| 68 | 1 | 0 | -6.023227 | 0.007342  | -4.787133 |
| 69 | 1 | 0 | -6.950331 | -0.736688 | -3.462803 |
| 70 | 6 | 0 | -1.136718 | -6.520899 | -0.723467 |
| 71 | 6 | 0 | 0.413154  | -2.121718 | 2.179090  |
| 72 | 6 | 0 | 1.677380  | -1.574206 | 2.451356  |
| 73 | 6 | 0 | 0.008340  | -3.257865 | 2.895711  |
| 74 | 6 | 0 | 2.518404  | -2.160086 | 3.393293  |
| 75 | 1 | 0 | 2.006619  | -0.696165 | 1.908452  |
| 76 | 6 | 0 | 0.851066  | -3.840912 | 3.837183  |
| 77 | 1 | 0 | -0.979196 | -3.668889 | 2.725905  |
| 78 | 6 | 0 | 2.109520  | -3.296973 | 4.087170  |
| 79 | 1 | 0 | 3.495053  | -1.730035 | 3.584856  |
| 80 | 1 | 0 | 0.518899  | -4.715069 | 4.385042  |
| 81 | 1 | 0 | 2.763209  | -3.751605 | 4.822233  |
| 82 | 6 | 0 | 0.594643  | 6.684838  | 1.325930  |
| 83 | 1 | 0 | 0.396015  | 7.213436  | 2.250564  |
| 84 | 6 | 0 | 0.217520  | 5.422437  | 1.151169  |
| 85 | 1 | 0 | -0.296897 | 4.910586  | 1.962942  |
| 86 | 6 | 0 | -2.089912 | -5.844721 | -2.920901 |
| 87 | 1 | 0 | -3.148123 | -5.584584 | -3.034760 |
| 88 | 1 | 0 | -1.535764 | -5.252819 | -3.657330 |
| 89 | 1 | 0 | -2.506451 | -3.569573 | -1.604954 |

|    |   |   |           |           |           |
|----|---|---|-----------|-----------|-----------|
| 90 | 1 | 0 | 1.115073  | 7.238353  | 0.550287  |
| 91 | 1 | 0 | -1.972712 | -6.899658 | -3.171292 |
| 92 | 1 | 0 | -0.848662 | -6.334490 | 0.304643  |
| 93 | 1 | 0 | -1.038624 | -7.539896 | -1.078848 |
| 94 | 1 | 0 | 0.920356  | 1.270098  | 0.005229  |
| 95 | 1 | 0 | -0.568472 | 2.447659  | 1.587669  |

**2-2-TS-exo**

Energy + zep (gas) = -2109.79572 au

Gibbs free energy (gas) = -2109.87850 au

Gibbs free energy (in solvent) = -2109.12808 au

Zero-point correction = 0.79279 au

Thermal correction to Gibbs free energy = 0.71001 au

Standard orientation:

| Center<br>Number | Atomic<br>Number | Atomic<br>Type | Coordinates (Angstroms) |           |           |
|------------------|------------------|----------------|-------------------------|-----------|-----------|
|                  |                  |                | X                       | Y         | Z         |
| 1                | 6                | 0              | 2.797554                | 0.095393  | -1.233601 |
| 2                | 6                | 0              | 4.820058                | -0.964179 | -1.594678 |
| 3                | 7                | 0              | 4.144346                | 0.009826  | -0.815760 |
| 4                | 8                | 0              | 1.987178                | 0.905681  | -0.750079 |
| 5                | 8                | 0              | 5.996789                | -1.208813 | -1.548123 |
| 6                | 6                | 0              | 4.778195                | 0.837717  | 0.158614  |
| 7                | 6                | 0              | 5.661965                | 0.270560  | 1.079380  |
| 8                | 6                | 0              | 4.540736                | 2.214364  | 0.177127  |
| 9                | 6                | 0              | 6.300929                | 1.079986  | 2.013670  |
| 10               | 6                | 0              | 6.054090                | 2.450739  | 2.047085  |
| 11               | 6                | 0              | 5.171532                | 3.012710  | 1.127018  |
| 12               | 1                | 0              | 6.996705                | 0.635056  | 2.715414  |
| 13               | 1                | 0              | 5.865288                | -0.791008 | 1.049172  |
| 14               | 1                | 0              | 6.555569                | 3.077753  | 2.774896  |
| 15               | 1                | 0              | 4.986603                | 4.080912  | 1.134619  |
| 16               | 1                | 0              | 3.870644                | 2.653002  | -0.548824 |
| 17               | 6                | 0              | 2.595296                | -0.881580 | -2.262378 |
| 18               | 6                | 0              | 3.763331                | -1.615514 | -2.452621 |
| 19               | 1                | 0              | 1.671038                | -0.971411 | -2.807486 |
| 20               | 1                | 0              | 4.073155                | -2.057650 | -3.388437 |
| 21               | 7                | 0              | -0.528338               | 1.722079  | -1.254704 |
| 22               | 6                | 0              | -1.726589               | 1.789464  | -0.315040 |
| 23               | 6                | 0              | -0.851169               | 1.017124  | -2.549891 |
| 24               | 6                | 0              | -0.072883               | 3.134359  | -1.553117 |
| 25               | 6                | 0              | -2.011360               | 0.444397  | 0.404078  |



|    |   |   |           |           |           |
|----|---|---|-----------|-----------|-----------|
| 26 | 6 | 0 | -2.918215 | 2.348886  | -1.131152 |
| 27 | 6 | 0 | -1.891157 | 1.836702  | -3.342942 |
| 28 | 6 | 0 | -1.237173 | 3.956137  | -2.179980 |
| 29 | 6 | 0 | -3.312087 | 0.537610  | 1.198479  |
| 30 | 6 | 0 | -2.409688 | 2.972773  | -2.444323 |
| 31 | 6 | 0 | -3.435012 | 1.472933  | 2.203448  |
| 32 | 6 | 0 | -4.416916 | -0.336262 | 0.949625  |
| 33 | 6 | 0 | -4.626254 | 1.555745  | 2.959899  |
| 34 | 6 | 0 | -5.578719 | -0.157133 | 1.776153  |
| 35 | 7 | 0 | -5.663345 | 0.778193  | 2.758341  |
| 36 | 1 | 0 | -1.204191 | 0.019252  | -2.295833 |
| 37 | 1 | 0 | 0.095556  | 0.905425  | -3.076520 |
| 38 | 1 | 0 | 0.786933  | 3.046742  | -2.215658 |
| 39 | 1 | 0 | 0.276888  | 3.557280  | -0.611644 |
| 40 | 1 | 0 | -2.117038 | -0.331745 | -0.347671 |
| 41 | 1 | 0 | -3.460087 | 3.075416  | -0.526486 |
| 42 | 1 | 0 | -3.628083 | 1.550613  | -1.364753 |
| 43 | 1 | 0 | -1.444369 | 2.244008  | -4.252607 |
| 44 | 1 | 0 | -2.715994 | 1.191559  | -3.651813 |
| 45 | 1 | 0 | -0.902608 | 4.332016  | -3.150472 |
| 46 | 1 | 0 | -3.221127 | 3.506052  | -2.940710 |
| 47 | 1 | 0 | -2.630233 | 2.162986  | 2.438951  |
| 48 | 6 | 0 | -4.443024 | -1.345197 | -0.038324 |
| 49 | 1 | 0 | -4.712694 | 2.294889  | 3.751599  |
| 50 | 6 | 0 | -6.701562 | -0.994301 | 1.567209  |
| 51 | 6 | 0 | 1.187558  | -2.513766 | -0.332689 |
| 52 | 6 | 0 | 0.036004  | -1.783308 | 0.048419  |
| 53 | 6 | 0 | 0.029133  | -0.905882 | 1.113999  |
| 54 | 7 | 0 | -0.909440 | 0.078132  | 1.293257  |
| 55 | 1 | 0 | 2.088340  | -2.294150 | 0.227290  |
| 56 | 1 | 0 | -0.839774 | -1.862729 | -0.587268 |
| 57 | 1 | 0 | -0.976580 | 0.440096  | 2.233864  |
| 58 | 6 | 0 | 1.254549  | -3.493951 | -1.309938 |
| 59 | 6 | 0 | 2.458310  | -4.015745 | -1.825065 |
| 60 | 6 | 0 | -6.702018 | -1.966076 | 0.599245  |
| 61 | 6 | 0 | -5.555993 | -2.147939 | -0.217121 |
| 62 | 1 | 0 | -7.561791 | -0.836269 | 2.205418  |
| 63 | 1 | 0 | -7.575903 | -2.588867 | 0.466898  |
| 64 | 8 | 0 | -5.463576 | -3.081096 | -1.194490 |
| 65 | 1 | 0 | -3.598121 | -1.542690 | -0.684465 |
| 66 | 6 | 0 | -6.561665 | -3.966180 | -1.426457 |
| 67 | 1 | 0 | -7.457510 | -3.417732 | -1.732474 |
| 68 | 1 | 0 | -6.243810 | -4.617062 | -2.237975 |
| 69 | 1 | 0 | -6.778841 | -4.571244 | -0.541311 |

|    |   |   |           |           |           |
|----|---|---|-----------|-----------|-----------|
| 70 | 6 | 0 | 3.701608  | -3.478319 | -1.468481 |
| 71 | 6 | 0 | 1.039822  | -0.955724 | 2.203055  |
| 72 | 6 | 0 | 1.700519  | 0.206139  | 2.628674  |
| 73 | 6 | 0 | 1.298120  | -2.167776 | 2.860383  |
| 74 | 6 | 0 | 2.607910  | 0.152360  | 3.681156  |
| 75 | 1 | 0 | 1.544899  | 1.136880  | 2.097708  |
| 76 | 6 | 0 | 2.198015  | -2.213727 | 3.920600  |
| 77 | 1 | 0 | 0.774463  | -3.064473 | 2.552046  |
| 78 | 6 | 0 | 2.854132  | -1.055406 | 4.332205  |
| 79 | 1 | 0 | 3.136289  | 1.049411  | 3.980303  |
| 80 | 1 | 0 | 2.381369  | -3.153018 | 4.428864  |
| 81 | 1 | 0 | 3.558336  | -1.093886 | 5.154978  |
| 82 | 6 | 0 | -1.623260 | 6.400412  | -1.772564 |
| 83 | 1 | 0 | -1.913892 | 7.223479  | -1.130763 |
| 84 | 6 | 0 | -1.619325 | 5.145024  | -1.336250 |
| 85 | 1 | 0 | -1.908814 | 4.944510  | -0.305960 |
| 86 | 6 | 0 | 2.394744  | -5.062130 | -2.909545 |
| 87 | 1 | 0 | 2.511374  | -6.061995 | -2.476801 |
| 88 | 1 | 0 | 1.440778  | -5.045955 | -3.440936 |
| 89 | 1 | 0 | 0.325763  | -3.828709 | -1.766021 |
| 90 | 1 | 0 | -1.336386 | 6.652589  | -2.788851 |
| 91 | 1 | 0 | 3.201365  | -4.936005 | -3.635977 |
| 92 | 1 | 0 | 3.829073  | -3.034893 | -0.488839 |
| 93 | 1 | 0 | 4.602879  | -3.935310 | -1.861431 |
| 94 | 1 | 0 | 0.311283  | 1.236578  | -0.848732 |
| 95 | 1 | 0 | -1.422667 | 2.507879  | 0.448096  |

-----

### 2-2-IM-exo

Energy + zep (gas) = -2109.85143 au

Gibbs free energy (gas) = -2109.93432 au

Gibbs free energy (in solvent) = -2109.20173 au

Zero-point correction = 0.79894 au

Thermal correction to Gibbs free energy = 0.71605 au

Standard orientation:

-----

| Center<br>Number | Atomic<br>Number | Atomic<br>Type | Coordinates (Angstroms) |           |           |
|------------------|------------------|----------------|-------------------------|-----------|-----------|
|                  |                  |                | X                       | Y         | Z         |
| 1                | 6                | 0              | 2.858750                | -0.044937 | -1.058656 |
| 2                | 6                | 0              | 4.786327                | -1.335395 | -1.274509 |
| 3                | 7                | 0              | 4.224053                | -0.088904 | -0.873035 |
| 4                | 8                | 0              | 2.160984                | 0.937814  | -0.844365 |
| 5                | 8                | 0              | 5.933784                | -1.640645 | -1.116226 |

|    |   |   |           |           |           |
|----|---|---|-----------|-----------|-----------|
| 6  | 6 | 0 | 5.006604  | 0.988425  | -0.331141 |
| 7  | 6 | 0 | 5.689226  | 0.803975  | 0.868699  |
| 8  | 6 | 0 | 5.092549  | 2.194443  | -1.023576 |
| 9  | 6 | 0 | 6.463487  | 1.842127  | 1.379409  |
| 10 | 6 | 0 | 6.548428  | 3.054776  | 0.698953  |
| 11 | 6 | 0 | 5.862352  | 3.229714  | -0.501380 |
| 12 | 1 | 0 | 7.004201  | 1.699878  | 2.307425  |
| 13 | 1 | 0 | 5.624374  | -0.143414 | 1.387917  |
| 14 | 1 | 0 | 7.154924  | 3.858970  | 1.098440  |
| 15 | 1 | 0 | 5.936418  | 4.167899  | -1.038592 |
| 16 | 1 | 0 | 4.571546  | 2.314773  | -1.965274 |
| 17 | 6 | 0 | 2.381820  | -1.401578 | -1.545403 |
| 18 | 6 | 0 | 3.674624  | -2.153875 | -1.919511 |
| 19 | 1 | 0 | 1.730542  | -1.256331 | -2.410645 |
| 20 | 1 | 0 | 3.833650  | -2.069446 | -2.999602 |
| 21 | 7 | 0 | -0.447476 | 1.867441  | -0.855910 |
| 22 | 6 | 0 | -1.731975 | 1.811711  | -0.031760 |
| 23 | 6 | 0 | -0.669961 | 1.436887  | -2.288879 |
| 24 | 6 | 0 | 0.079700  | 3.285657  | -0.829579 |
| 25 | 6 | 0 | -2.065855 | 0.380532  | 0.466910  |
| 26 | 6 | 0 | -2.824886 | 2.523660  | -0.860118 |
| 27 | 6 | 0 | -1.558676 | 2.474851  | -3.004249 |
| 28 | 6 | 0 | -1.016804 | 4.264916  | -1.343051 |
| 29 | 6 | 0 | -3.437757 | 0.392154  | 1.135471  |
| 30 | 6 | 0 | -2.166181 | 3.404813  | -1.940640 |
| 31 | 6 | 0 | -3.626675 | 1.125687  | 2.287716  |
| 32 | 6 | 0 | -4.550362 | -0.337611 | 0.609627  |
| 33 | 6 | 0 | -4.890200 | 1.147692  | 2.921011  |
| 34 | 6 | 0 | -5.787539 | -0.236475 | 1.333598  |
| 35 | 7 | 0 | -5.936389 | 0.499566  | 2.466679  |
| 36 | 1 | 0 | -1.128060 | 0.450079  | -2.259281 |
| 37 | 1 | 0 | 0.320106  | 1.334373  | -2.728393 |
| 38 | 1 | 0 | 0.979786  | 3.292718  | -1.441972 |
| 39 | 1 | 0 | 0.375404  | 3.493056  | 0.198545  |
| 40 | 1 | 0 | -2.101924 | -0.299438 | -0.383667 |
| 41 | 1 | 0 | -3.452884 | 3.111071  | -0.191185 |
| 42 | 1 | 0 | -3.480972 | 1.792942  | -1.341365 |
| 43 | 1 | 0 | -0.975370 | 3.049735  | -3.727273 |
| 44 | 1 | 0 | -2.346745 | 1.963527  | -3.560295 |
| 45 | 1 | 0 | -0.588058 | 4.848406  | -2.161927 |
| 46 | 1 | 0 | -2.909396 | 4.062941  | -2.391771 |
| 47 | 1 | 0 | -2.815798 | 1.694823  | 2.731012  |
| 48 | 6 | 0 | -4.514487 | -1.140013 | -0.552318 |
| 49 | 1 | 0 | -5.028144 | 1.727073  | 3.829898  |

|    |   |   |           |           |           |
|----|---|---|-----------|-----------|-----------|
| 50 | 6 | 0 | -6.919387 | -0.939243 | 0.854024  |
| 51 | 6 | 0 | 1.561161  | -2.167097 | -0.451748 |
| 52 | 6 | 0 | 0.296588  | -1.438971 | -0.086954 |
| 53 | 6 | 0 | 0.005905  | -0.949103 | 1.135811  |
| 54 | 7 | 0 | -1.050089 | -0.069536 | 1.421177  |
| 55 | 1 | 0 | 2.198983  | -2.216941 | 0.438394  |
| 56 | 1 | 0 | -0.389673 | -1.267579 | -0.911598 |
| 57 | 1 | 0 | -1.401082 | -0.168469 | 2.363162  |
| 58 | 6 | 0 | 1.341793  | -3.579078 | -0.962767 |
| 59 | 6 | 0 | 2.350421  | -4.286092 | -1.480139 |
| 60 | 6 | 0 | -6.858647 | -1.710694 | -0.278475 |
| 61 | 6 | 0 | -5.638001 | -1.816453 | -0.993598 |
| 62 | 1 | 0 | -7.837015 | -0.844134 | 1.420823  |
| 63 | 1 | 0 | -7.741734 | -2.235470 | -0.616038 |
| 64 | 8 | 0 | -5.482069 | -2.557305 | -2.117794 |
| 65 | 1 | 0 | -3.610407 | -1.274322 | -1.131208 |
| 66 | 6 | 0 | -6.587392 | -3.309809 | -2.620706 |
| 67 | 1 | 0 | -7.419055 | -2.657385 | -2.903439 |
| 68 | 1 | 0 | -6.213463 | -3.819174 | -3.506225 |
| 69 | 1 | 0 | -6.927636 | -4.052692 | -1.893146 |
| 70 | 6 | 0 | 3.724811  | -3.652410 | -1.531941 |
| 71 | 6 | 0 | 0.822375  | -1.236644 | 2.354151  |
| 72 | 6 | 0 | 1.350011  | -0.188873 | 3.121146  |
| 73 | 6 | 0 | 1.035748  | -2.556161 | 2.773516  |
| 74 | 6 | 0 | 2.090677  | -0.456021 | 4.269024  |
| 75 | 1 | 0 | 1.191537  | 0.835949  | 2.806504  |
| 76 | 6 | 0 | 1.771788  | -2.820984 | 3.925494  |
| 77 | 1 | 0 | 0.611606  | -3.372766 | 2.200968  |
| 78 | 6 | 0 | 2.302812  | -1.772662 | 4.673934  |
| 79 | 1 | 0 | 2.503553  | 0.363035  | 4.846561  |
| 80 | 1 | 0 | 1.923287  | -3.846248 | 4.242375  |
| 81 | 1 | 0 | 2.874842  | -1.980094 | 5.570716  |
| 82 | 6 | 0 | -1.420451 | 6.556112  | -0.408196 |
| 83 | 1 | 0 | -1.767279 | 7.215137  | 0.378720  |
| 84 | 6 | 0 | -1.471560 | 5.234025  | -0.281911 |
| 85 | 1 | 0 | -1.866551 | 4.808546  | 0.639102  |
| 86 | 6 | 0 | 2.215656  | -5.701815 | -1.962970 |
| 87 | 1 | 0 | 2.891690  | -6.366795 | -1.413912 |
| 88 | 1 | 0 | 1.197555  | -6.074796 | -1.839325 |
| 89 | 1 | 0 | 0.346237  | -4.002413 | -0.874479 |
| 90 | 1 | 0 | -1.030916 | 7.029819  | -1.304121 |
| 91 | 1 | 0 | 2.488237  | -5.783912 | -3.021043 |
| 92 | 1 | 0 | 4.200964  | -3.753780 | -0.548912 |
| 93 | 1 | 0 | 4.375598  | -4.184911 | -2.227321 |

|    |   |   |           |          |           |
|----|---|---|-----------|----------|-----------|
| 94 | 1 | 0 | 0.300497  | 1.260123 | -0.478183 |
| 95 | 1 | 0 | -1.496542 | 2.395782 | 0.858421  |

-----

### 2-3-COM-endo

Energy + zep (gas) = -2109.81356 au

Gibbs free energy (gas) = -2109.90085 au

Gibbs free energy (in solvent) = -2109.15090 au

Zero-point correction = 0.79261 au

Thermal correction to Gibbs free energy = 0.70532 au

### Standard orientation:

-----

| Center<br>Number | Atomic<br>Number | Atomic<br>Type | Coordinates (Angstroms) |           |           |
|------------------|------------------|----------------|-------------------------|-----------|-----------|
|                  |                  |                | X                       | Y         | Z         |
| 1                | 7                | 0              | 0.021840                | 1.262977  | -0.944912 |
| 2                | 6                | 0              | -1.175302               | 1.517501  | -0.030091 |
| 3                | 6                | 0              | -0.388082               | 0.752514  | -2.310211 |
| 4                | 6                | 0              | 0.803729                | 2.553566  | -1.098125 |
| 5                | 6                | 0              | -1.804654               | 0.212455  | 0.535484  |
| 6                | 6                | 0              | -2.163638               | 2.412663  | -0.817063 |
| 7                | 6                | 0              | -1.178543               | 1.856666  | -3.043168 |
| 8                | 6                | 0              | -0.118877               | 3.667189  | -1.670780 |
| 9                | 6                | 0              | -2.992148               | 0.598505  | 1.419462  |
| 10               | 6                | 0              | -1.467294               | 3.002712  | -2.057432 |
| 11               | 6                | 0              | -2.776931               | 1.334340  | 2.564409  |
| 12               | 6                | 0              | -4.335409               | 0.214349  | 1.110679  |
| 13               | 6                | 0              | -3.858525               | 1.690605  | 3.401925  |
| 14               | 6                | 0              | -5.356574               | 0.639287  | 2.027880  |
| 15               | 7                | 0              | -5.103654               | 1.365284  | 3.149240  |
| 16               | 1                | 0              | -0.966391               | -0.155520 | -2.155240 |
| 17               | 1                | 0              | 0.536047                | 0.472506  | -2.811780 |
| 18               | 1                | 0              | 1.645307                | 2.324394  | -1.747407 |
| 19               | 1                | 0              | 1.201942                | 2.802887  | -0.114657 |
| 20               | 1                | 0              | -2.162565               | -0.385355 | -0.300100 |
| 21               | 1                | 0              | -2.543151               | 3.195885  | -0.161679 |
| 22               | 1                | 0              | -3.030857               | 1.827918  | -1.135138 |
| 23               | 1                | 0              | -0.611955               | 2.227820  | -3.899940 |
| 24               | 1                | 0              | -2.113595               | 1.446602  | -3.429417 |
| 25               | 1                | 0              | 0.335948                | 4.042732  | -2.591297 |
| 26               | 1                | 0              | -2.112139               | 3.747451  | -2.525354 |
| 27               | 1                | 0              | -1.780613               | 1.655181  | 2.853208  |
| 28               | 6                | 0              | -4.717724               | -0.541715 | -0.020001 |
| 29               | 1                | 0              | -3.675303               | 2.267084  | 4.304790  |

|    |   |   |           |           |           |
|----|---|---|-----------|-----------|-----------|
| 30 | 6 | 0 | -6.702469 | 0.289235  | 1.762561  |
| 31 | 6 | 0 | -7.048272 | -0.444899 | 0.656489  |
| 32 | 6 | 0 | -6.042432 | -0.870127 | -0.248701 |
| 33 | 1 | 0 | -7.449562 | 0.623730  | 2.471302  |
| 34 | 1 | 0 | -8.085715 | -0.697252 | 0.485493  |
| 35 | 8 | 0 | -6.289421 | -1.605084 | -1.361581 |
| 36 | 1 | 0 | -3.995606 | -0.911002 | -0.735434 |
| 37 | 6 | 0 | -7.631937 | -1.988673 | -1.662518 |
| 38 | 1 | 0 | -8.270773 | -1.114366 | -1.819887 |
| 39 | 1 | 0 | -7.571386 | -2.560243 | -2.586159 |
| 40 | 1 | 0 | -8.052958 | -2.619394 | -0.873792 |
| 41 | 6 | 0 | 0.002072  | 6.093326  | -1.045028 |
| 42 | 1 | 0 | -0.134070 | 6.900265  | -0.334914 |
| 43 | 6 | 0 | -0.268272 | 4.831836  | -0.725571 |
| 44 | 1 | 0 | -0.626861 | 4.607199  | 0.277604  |
| 45 | 1 | 0 | 0.365851  | 6.367685  | -2.030567 |
| 46 | 1 | 0 | 0.662173  | 0.570794  | -0.535448 |
| 47 | 1 | 0 | -0.746179 | 2.070017  | 0.808140  |
| 48 | 7 | 0 | -0.873921 | -0.616021 | 1.286525  |
| 49 | 1 | 0 | -0.623625 | -0.274945 | 2.202348  |
| 50 | 6 | 0 | -0.049423 | -1.626234 | 0.766458  |
| 51 | 6 | 0 | -0.642833 | -2.489838 | -0.289776 |
| 52 | 6 | 0 | 0.053327  | -2.762807 | -1.476344 |
| 53 | 6 | 0 | -1.911394 | -3.061938 | -0.106426 |
| 54 | 6 | 0 | -0.500192 | -3.593203 | -2.448636 |
| 55 | 6 | 0 | -2.460535 | -3.892710 | -1.078223 |
| 56 | 6 | 0 | -1.757316 | -4.160888 | -2.252348 |
| 57 | 6 | 0 | 2.046830  | -2.966129 | 1.089940  |
| 58 | 6 | 0 | 1.180210  | -1.837735 | 1.312677  |
| 59 | 6 | 0 | 3.266591  | -3.100574 | 1.657087  |
| 60 | 6 | 0 | 4.196433  | -4.224175 | 1.480037  |
| 61 | 6 | 0 | 4.189031  | -5.023416 | 0.402151  |
| 62 | 6 | 0 | 5.191739  | -4.425006 | 2.599653  |
| 63 | 1 | 0 | 1.024717  | -2.308472 | -1.633083 |
| 64 | 1 | 0 | -2.454268 | -2.869031 | 0.811489  |
| 65 | 1 | 0 | 0.049826  | -3.796628 | -3.360551 |
| 66 | 1 | 0 | -3.436555 | -4.334890 | -0.916252 |
| 67 | 1 | 0 | -2.185969 | -4.809574 | -3.007184 |
| 68 | 1 | 0 | 1.677279  | -3.760744 | 0.449943  |
| 69 | 1 | 0 | 1.523383  | -1.110787 | 2.047876  |
| 70 | 1 | 0 | 3.593509  | -2.328706 | 2.353662  |
| 71 | 1 | 0 | 3.500770  | -4.872926 | -0.422049 |
| 72 | 1 | 0 | 4.870502  | -5.861580 | 0.318596  |
| 73 | 1 | 0 | 5.800754  | -3.526115 | 2.746842  |

|    |   |   |          |           |           |
|----|---|---|----------|-----------|-----------|
| 74 | 1 | 0 | 5.862746 | -5.259883 | 2.395124  |
| 75 | 1 | 0 | 4.679700 | -4.620429 | 3.547427  |
| 76 | 6 | 0 | 3.735179 | -0.315650 | -1.105354 |
| 77 | 6 | 0 | 4.496453 | -1.483944 | -1.645394 |
| 78 | 6 | 0 | 5.777713 | -1.365507 | -1.300290 |
| 79 | 6 | 0 | 5.948966 | -0.111615 | -0.499472 |
| 80 | 7 | 0 | 4.647465 | 0.468061  | -0.415804 |
| 81 | 8 | 0 | 2.547575 | -0.076008 | -1.251097 |
| 82 | 8 | 0 | 6.943406 | 0.348410  | -0.015660 |
| 83 | 6 | 0 | 4.352681 | 1.694515  | 0.260341  |
| 84 | 6 | 0 | 4.722490 | 2.908525  | -0.316164 |
| 85 | 6 | 0 | 3.720449 | 1.664545  | 1.502933  |
| 86 | 6 | 0 | 4.448065 | 4.099607  | 0.351688  |
| 87 | 6 | 0 | 3.805343 | 4.077007  | 1.588309  |
| 88 | 6 | 0 | 3.443544 | 2.859447  | 2.163710  |
| 89 | 1 | 0 | 4.016901 | -2.264513 | -2.216089 |
| 90 | 1 | 0 | 6.607707 | -2.022898 | -1.511450 |
| 91 | 1 | 0 | 5.233978 | 2.915745  | -1.271126 |
| 92 | 1 | 0 | 3.473790 | 0.710372  | 1.952577  |
| 93 | 1 | 0 | 4.746747 | 5.043332  | -0.088711 |
| 94 | 1 | 0 | 3.603495 | 5.004707  | 2.110585  |
| 95 | 1 | 0 | 2.970029 | 2.838624  | 3.138535  |

### 2-3-TS-endo

Energy + zep (gas) = -2109.79250 au

Gibbs free energy (gas) = -2109.87371 au

Gibbs free energy (in solvent) = -2109.12661 au

Zero-point correction = 0.79390 au

Thermal correction to Gibbs free energy = 0.71269 au

Standard orientation:

| Center<br>Number | Atomic<br>Number | Atomic<br>Type | Coordinates (Angstroms) |           |           |
|------------------|------------------|----------------|-------------------------|-----------|-----------|
|                  |                  |                | X                       | Y         | Z         |
| 1                | 6                | 0              | 3.284376                | -0.612705 | -1.042295 |
| 2                | 6                | 0              | 3.538797                | -1.943043 | -1.505075 |
| 3                | 6                | 0              | 4.840520                | -2.317112 | -1.187435 |
| 4                | 6                | 0              | 5.512613                | -1.093009 | -0.613309 |
| 5                | 7                | 0              | 4.497081                | -0.128774 | -0.473594 |
| 6                | 8                | 0              | 2.252362                | 0.068139  | -1.128085 |
| 7                | 8                | 0              | 6.674733                | -0.946911 | -0.323505 |
| 8                | 6                | 0              | 4.683888                | 1.171150  | 0.077902  |
| 9                | 6                | 0              | 5.756120                | 1.962253  | -0.339259 |

|    |   |   |           |           |           |
|----|---|---|-----------|-----------|-----------|
| 10 | 6 | 0 | 3.800549  | 1.650844  | 1.048512  |
| 11 | 6 | 0 | 5.936631  | 3.227478  | 0.213216  |
| 12 | 6 | 0 | 5.049617  | 3.715067  | 1.170075  |
| 13 | 6 | 0 | 3.981246  | 2.922433  | 1.585865  |
| 14 | 1 | 0 | 2.824208  | -2.517955 | -2.070541 |
| 15 | 1 | 0 | 5.446009  | -2.994076 | -1.774912 |
| 16 | 1 | 0 | 6.449741  | 1.582013  | -1.076544 |
| 17 | 1 | 0 | 2.988031  | 1.019737  | 1.383288  |
| 18 | 1 | 0 | 6.775260  | 3.833568  | -0.108574 |
| 19 | 1 | 0 | 5.195593  | 4.700375  | 1.596569  |
| 20 | 1 | 0 | 3.299951  | 3.287326  | 2.346742  |
| 21 | 7 | 0 | -0.145600 | 1.365206  | -0.987803 |
| 22 | 6 | 0 | -1.326665 | 1.593841  | -0.048087 |
| 23 | 6 | 0 | -0.576066 | 0.844769  | -2.342245 |
| 24 | 6 | 0 | 0.599237  | 2.676152  | -1.162634 |
| 25 | 6 | 0 | -1.911634 | 0.289330  | 0.568584  |
| 26 | 6 | 0 | -2.358564 | 2.450806  | -0.823880 |
| 27 | 6 | 0 | -1.396922 | 1.931162  | -3.067109 |
| 28 | 6 | 0 | -0.363473 | 3.766745  | -1.711368 |
| 29 | 6 | 0 | -3.132587 | 0.650730  | 1.415190  |
| 30 | 6 | 0 | -1.700253 | 3.066410  | -2.073708 |
| 31 | 6 | 0 | -2.978207 | 1.445581  | 2.529886  |
| 32 | 6 | 0 | -4.446832 | 0.185108  | 1.096563  |
| 33 | 6 | 0 | -4.094325 | 1.784046  | 3.328263  |
| 34 | 6 | 0 | -5.508102 | 0.600266  | 1.971948  |
| 35 | 7 | 0 | -5.315946 | 1.386197  | 3.064179  |
| 36 | 1 | 0 | -1.140434 | -0.069785 | -2.171010 |
| 37 | 1 | 0 | 0.343562  | 0.574533  | -2.857257 |
| 38 | 1 | 0 | 1.434382  | 2.461606  | -1.825998 |
| 39 | 1 | 0 | 1.014832  | 2.935531  | -0.189180 |
| 40 | 1 | 0 | -2.214675 | -0.377937 | -0.234658 |
| 41 | 1 | 0 | -2.757726 | 3.219259  | -0.162935 |
| 42 | 1 | 0 | -3.207943 | 1.835319  | -1.131886 |
| 43 | 1 | 0 | -0.846034 | 2.317124  | -3.927497 |
| 44 | 1 | 0 | -2.326132 | 1.501363  | -3.446214 |
| 45 | 1 | 0 | 0.062714  | 4.157400  | -2.639171 |
| 46 | 1 | 0 | -2.375583 | 3.793547  | -2.526016 |
| 47 | 1 | 0 | -2.006191 | 1.830480  | 2.823488  |
| 48 | 6 | 0 | -4.765458 | -0.639079 | -0.005893 |
| 49 | 1 | 0 | -3.960073 | 2.408055  | 4.207698  |
| 50 | 6 | 0 | -6.829506 | 0.175194  | 1.693369  |
| 51 | 6 | 0 | -7.114145 | -0.620726 | 0.613109  |
| 52 | 6 | 0 | -6.068107 | -1.037721 | -0.249815 |
| 53 | 1 | 0 | -7.608061 | 0.504449  | 2.369961  |



|    |   |   |           |           |           |
|----|---|---|-----------|-----------|-----------|
| 54 | 1 | 0 | -8.134556 | -0.927900 | 0.429855  |
| 55 | 8 | 0 | -6.254316 | -1.829984 | -1.333879 |
| 56 | 1 | 0 | -4.010359 | -1.007377 | -0.687439 |
| 57 | 6 | 0 | -7.570388 | -2.287784 | -1.648827 |
| 58 | 1 | 0 | -8.243792 | -1.451570 | -1.859560 |
| 59 | 1 | 0 | -7.460517 | -2.895069 | -2.544667 |
| 60 | 1 | 0 | -7.982133 | -2.902881 | -0.843096 |
| 61 | 6 | 0 | -0.264796 | 6.190076  | -1.070758 |
| 62 | 1 | 0 | -0.402462 | 6.990708  | -0.353874 |
| 63 | 6 | 0 | -0.523508 | 4.924282  | -0.759112 |
| 64 | 1 | 0 | -0.875398 | 4.690927  | 0.244723  |
| 65 | 1 | 0 | 0.093937  | 6.473951  | -2.055367 |
| 66 | 1 | 0 | 0.551691  | 0.695908  | -0.620029 |
| 67 | 1 | 0 | -0.899797 | 2.177113  | 0.770613  |
| 68 | 7 | 0 | -0.938987 | -0.435755 | 1.383935  |
| 69 | 1 | 0 | -0.634097 | 0.054334  | 2.213991  |
| 70 | 6 | 0 | -0.075217 | -1.422351 | 0.933714  |
| 71 | 6 | 0 | -0.637480 | -2.387486 | -0.051960 |
| 72 | 6 | 0 | -0.061117 | -2.583914 | -1.311411 |
| 73 | 6 | 0 | -1.774380 | -3.130425 | 0.301767  |
| 74 | 6 | 0 | -0.602697 | -3.513743 | -2.197507 |
| 75 | 6 | 0 | -2.305901 | -4.064176 | -0.581919 |
| 76 | 6 | 0 | -1.721672 | -4.258939 | -1.833103 |
| 77 | 6 | 0 | 2.214498  | -2.436876 | 1.219820  |
| 78 | 6 | 0 | 1.169863  | -1.514667 | 1.499505  |
| 79 | 6 | 0 | 3.425620  | -2.334434 | 1.881364  |
| 80 | 6 | 0 | 4.653005  | -2.945191 | 1.546876  |
| 81 | 6 | 0 | 4.825029  | -3.691086 | 0.372611  |
| 82 | 6 | 0 | 5.866526  | -2.648660 | 2.391475  |
| 83 | 1 | 0 | 0.797201  | -1.989608 | -1.593521 |
| 84 | 1 | 0 | -2.226596 | -2.984934 | 1.275755  |
| 85 | 1 | 0 | -0.150677 | -3.655377 | -3.172711 |
| 86 | 1 | 0 | -3.176271 | -4.641053 | -0.292607 |
| 87 | 1 | 0 | -2.138097 | -4.986639 | -2.519573 |
| 88 | 1 | 0 | 2.045351  | -3.221347 | 0.492302  |
| 89 | 1 | 0 | 1.417022  | -0.745677 | 2.229967  |
| 90 | 1 | 0 | 3.465888  | -1.621563 | 2.701562  |
| 91 | 1 | 0 | 3.985490  | -4.219256 | -0.059094 |
| 92 | 1 | 0 | 5.784146  | -4.175283 | 0.223284  |
| 93 | 1 | 0 | 5.630879  | -1.985196 | 3.224389  |
| 94 | 1 | 0 | 6.651398  | -2.180735 | 1.788719  |
| 95 | 1 | 0 | 6.281446  | -3.575013 | 2.800304  |

### 2-3-IM-endo

Energy + zep (gas) = -2109.84825 au

Gibbs free energy (gas) = -2109.92899 au

Gibbs free energy (in solvent) = -2109.19792 au

Zero-point correction = 0.79947 au

Thermal correction to Gibbs free energy = 0.71874 au

Standard orientation:

| Center<br>Number | Atomic<br>Number | Atomic<br>Type | Coordinates (Angstroms) |           |           |
|------------------|------------------|----------------|-------------------------|-----------|-----------|
|                  |                  |                | X                       | Y         | Z         |
| 1                | 7                | 0              | -0.129699               | 1.534077  | -0.641137 |
| 2                | 6                | 0              | -1.390137               | 1.657588  | 0.218602  |
| 3                | 6                | 0              | -0.433890               | 1.118388  | -2.061946 |
| 4                | 6                | 0              | 0.593884                | 2.867564  | -0.642640 |
| 5                | 6                | 0              | -2.026453               | 0.293267  | 0.612210  |
| 6                | 6                | 0              | -2.357943               | 2.611731  | -0.527934 |
| 7                | 6                | 0              | -1.279519               | 2.215379  | -2.744791 |
| 8                | 6                | 0              | -0.323157               | 3.973587  | -1.235835 |
| 9                | 6                | 0              | -3.253367               | 0.577882  | 1.480197  |
| 10               | 6                | 0              | -1.636343               | 3.292007  | -1.704064 |
| 11               | 6                | 0              | -3.092156               | 1.174012  | 2.711485  |
| 12               | 6                | 0              | -4.580683               | 0.238078  | 1.067562  |
| 13               | 6                | 0              | -4.211621               | 1.440175  | 3.532135  |
| 14               | 6                | 0              | -5.644127               | 0.565944  | 1.976568  |
| 15               | 7                | 0              | -5.444248               | 1.157397  | 3.184448  |
| 16               | 1                | 0              | -0.941343               | 0.156712  | -2.016858 |
| 17               | 1                | 0              | 0.533154                | 0.963094  | -2.538299 |
| 18               | 1                | 0              | 1.512285                | 2.718277  | -1.205123 |
| 19               | 1                | 0              | 0.871614                | 3.070975  | 0.391562  |
| 20               | 1                | 0              | -2.344693               | -0.215893 | -0.295785 |
| 21               | 1                | 0              | -2.757036               | 3.345465  | 0.171879  |
| 22               | 1                | 0              | -3.214634               | 2.051041  | -0.909978 |
| 23               | 1                | 0              | -0.726444               | 2.658960  | -3.575525 |
| 24               | 1                | 0              | -2.189601               | 1.778528  | -3.160585 |
| 25               | 1                | 0              | 0.166439                | 4.381494  | -2.124330 |
| 26               | 1                | 0              | -2.288553               | 4.042542  | -2.152335 |
| 27               | 1                | 0              | -2.109983               | 1.448422  | 3.083727  |
| 28               | 6                | 0              | -4.909979               | -0.385832 | -0.156781 |
| 29               | 1                | 0              | -4.070276               | 1.906434  | 4.503588  |
| 30               | 6                | 0              | -6.976767               | 0.261435  | 1.608210  |
| 31               | 6                | 0              | -7.271034               | -0.339029 | 0.410396  |
| 32               | 6                | 0              | -6.223334               | -0.671538 | -0.486084 |
| 33               | 1                | 0              | -7.756398               | 0.521528  | 2.313132  |

|    |   |   |           |           |           |
|----|---|---|-----------|-----------|-----------|
| 34 | 1 | 0 | -8.300066 | -0.558280 | 0.160742  |
| 35 | 8 | 0 | -6.418330 | -1.273016 | -1.686056 |
| 36 | 1 | 0 | -4.155001 | -0.685553 | -0.871187 |
| 37 | 6 | 0 | -7.744786 | -1.611812 | -2.091361 |
| 38 | 1 | 0 | -8.374520 | -0.721492 | -2.182322 |
| 39 | 1 | 0 | -7.640442 | -2.078894 | -3.068370 |
| 40 | 1 | 0 | -8.205034 | -2.322669 | -1.398349 |
| 41 | 6 | 0 | -0.251096 | 6.380684  | -0.534956 |
| 42 | 1 | 0 | -0.430989 | 7.165823  | 0.189664  |
| 43 | 6 | 0 | -0.537571 | 5.110212  | -0.269862 |
| 44 | 1 | 0 | -0.954038 | 4.855756  | 0.703499  |
| 45 | 1 | 0 | 0.172722  | 6.684149  | -1.487360 |
| 46 | 1 | 0 | 0.532424  | 0.839971  | -0.261826 |
| 47 | 1 | 0 | -1.029644 | 2.128543  | 1.135780  |
| 48 | 6 | 0 | 3.374866  | -0.324877 | -0.510261 |
| 49 | 6 | 0 | 3.080261  | -1.808947 | -0.683270 |
| 50 | 6 | 0 | 4.470976  | -2.470417 | -0.779934 |
| 51 | 6 | 0 | 5.452195  | -1.365034 | -0.398012 |
| 52 | 7 | 0 | 4.727347  | -0.146212 | -0.315400 |
| 53 | 8 | 0 | 2.555002  | 0.582407  | -0.546943 |
| 54 | 8 | 0 | 6.632424  | -1.464260 | -0.215233 |
| 55 | 6 | 0 | 5.350656  | 1.123305  | -0.063463 |
| 56 | 6 | 0 | 6.315643  | 1.601742  | -0.946666 |
| 57 | 6 | 0 | 5.001013  | 1.850990  | 1.072357  |
| 58 | 6 | 0 | 6.930543  | 2.824041  | -0.690727 |
| 59 | 6 | 0 | 6.579843  | 3.563223  | 0.436860  |
| 60 | 6 | 0 | 5.615558  | 3.075505  | 1.316908  |
| 61 | 1 | 0 | 2.530120  | -1.906411 | -1.620919 |
| 62 | 1 | 0 | 4.696490  | -2.723977 | -1.821069 |
| 63 | 1 | 0 | 6.591552  | 1.018373  | -1.815922 |
| 64 | 1 | 0 | 4.267701  | 1.453660  | 1.763052  |
| 65 | 1 | 0 | 7.687695  | 3.194865  | -1.371125 |
| 66 | 1 | 0 | 7.063863  | 4.512237  | 0.634810  |
| 67 | 1 | 0 | 5.351740  | 3.641480  | 2.202582  |
| 68 | 7 | 0 | -1.120071 | -0.619362 | 1.304350  |
| 69 | 1 | 0 | -0.737698 | -0.252338 | 2.165191  |
| 70 | 6 | 0 | -0.235414 | -1.471815 | 0.599509  |
| 71 | 6 | 0 | -0.901138 | -2.422869 | -0.335385 |
| 72 | 6 | 0 | -0.411066 | -2.673619 | -1.624436 |
| 73 | 6 | 0 | -2.054492 | -3.104002 | 0.085412  |
| 74 | 6 | 0 | -1.042199 | -3.589861 | -2.463652 |
| 75 | 6 | 0 | -2.680256 | -4.022193 | -0.750736 |
| 76 | 6 | 0 | -2.176521 | -4.269201 | -2.027484 |
| 77 | 6 | 0 | 2.168486  | -2.400607 | 0.463412  |

|    |   |   |           |           |           |
|----|---|---|-----------|-----------|-----------|
| 78 | 6 | 0 | 1.080038  | -1.453608 | 0.893824  |
| 79 | 6 | 0 | 3.009609  | -2.836078 | 1.649721  |
| 80 | 6 | 0 | 4.173093  | -3.476014 | 1.501671  |
| 81 | 6 | 0 | 4.684867  | -3.714532 | 0.099441  |
| 82 | 6 | 0 | 5.000317  | -3.979404 | 2.648603  |
| 83 | 1 | 0 | 0.459690  | -2.137669 | -1.982049 |
| 84 | 1 | 0 | -2.445149 | -2.913792 | 1.077329  |
| 85 | 1 | 0 | -0.649865 | -3.769447 | -3.458068 |
| 86 | 1 | 0 | -3.562343 | -4.547882 | -0.404451 |
| 87 | 1 | 0 | -2.666990 | -4.983619 | -2.678053 |
| 88 | 1 | 0 | 1.703530  | -3.289850 | 0.022081  |
| 89 | 1 | 0 | 1.405469  | -0.690156 | 1.598869  |
| 90 | 1 | 0 | 2.602824  | -2.657644 | 2.640630  |
| 91 | 1 | 0 | 4.167913  | -4.569968 | -0.351950 |
| 92 | 1 | 0 | 5.749887  | -3.954826 | 0.104476  |
| 93 | 1 | 0 | 4.529513  | -3.770038 | 3.610656  |
| 94 | 1 | 0 | 5.995128  | -3.521163 | 2.638861  |
| 95 | 1 | 0 | 5.152114  | -5.061803 | 2.570916  |

#### 2-4-COM-exo

Energy + zep (gas) = -2109.82024 au

Gibbs free energy (gas) = -2109.90989 au

Gibbs free energy (in solvent) = -2109.15401 au

Zero-point correction = 0.79322 au

Thermal correction to Gibbs free energy = 0.70358 au

Standard orientation:

| Center<br>Number | Atomic<br>Number | Atomic<br>Type | Coordinates (Angstroms) |          |           |
|------------------|------------------|----------------|-------------------------|----------|-----------|
|                  |                  |                | X                       | Y        | Z         |
| 1                | 7                | 0              | -1.028402               | 1.670863 | 1.044233  |
| 2                | 6                | 0              | 0.410804                | 2.122621 | 0.847004  |
| 3                | 6                | 0              | -1.380143               | 1.464621 | 2.498137  |
| 4                | 6                | 0              | -1.951422               | 2.702105 | 0.441994  |
| 5                | 6                | 0              | 1.390999                | 0.943758 | 1.027869  |
| 6                | 6                | 0              | 0.654608                | 3.334774 | 1.771931  |
| 7                | 6                | 0              | -1.303571               | 2.821600 | 3.233211  |
| 8                | 6                | 0              | -1.696785               | 4.087703 | 1.108059  |
| 9                | 6                | 0              | 2.839414                | 1.370058 | 0.794474  |
| 10               | 6                | 0              | -0.699334               | 3.869219 | 2.280671  |
| 11               | 6                | 0              | 3.350676                | 1.814149 | -0.470877 |
| 12               | 6                | 0              | 3.717376                | 1.299812 | 1.852703  |
| 13               | 6                | 0              | 4.743318                | 2.160994 | -0.517724 |

|    |   |   |           |           |           |
|----|---|---|-----------|-----------|-----------|
| 14 | 6 | 0 | 5.073471  | 1.667272  | 1.692054  |
| 15 | 7 | 0 | 5.575629  | 2.085734  | 0.555884  |
| 16 | 1 | 0 | -0.689616 | 0.725173  | 2.897826  |
| 17 | 1 | 0 | -2.377351 | 1.026220  | 2.508236  |
| 18 | 1 | 0 | -2.967052 | 2.338580  | 0.589002  |
| 19 | 1 | 0 | -1.754232 | 2.718294  | -0.629984 |
| 20 | 1 | 0 | 1.332547  | 0.617209  | 2.067828  |
| 21 | 1 | 0 | 1.211546  | 4.100195  | 1.231308  |
| 22 | 1 | 0 | 1.273206  | 3.045908  | 2.625852  |
| 23 | 1 | 0 | -2.297025 | 3.135970  | 3.560503  |
| 24 | 1 | 0 | -0.686806 | 2.723811  | 4.128599  |
| 25 | 1 | 0 | -2.638394 | 4.429940  | 1.545609  |
| 26 | 1 | 0 | -0.552851 | 4.814052  | 2.805119  |
| 27 | 6 | 0 | 2.599874  | 1.927031  | -1.665295 |
| 28 | 1 | 0 | 3.380230  | 0.952552  | 2.823365  |
| 29 | 6 | 0 | 5.301116  | 2.606646  | -1.740676 |
| 30 | 1 | 0 | 5.753490  | 1.607983  | 2.537613  |
| 31 | 7 | 0 | 0.935581  | -0.205412 | 0.216736  |
| 32 | 1 | 0 | 1.101017  | -0.038029 | -0.769634 |
| 33 | 6 | 0 | -1.870232 | 6.286756  | -0.084510 |
| 34 | 1 | 0 | -1.506376 | 7.008811  | -0.805740 |
| 35 | 6 | 0 | -1.249988 | 5.127911  | 0.113160  |
| 36 | 1 | 0 | -0.360407 | 4.900849  | -0.472298 |
| 37 | 1 | 0 | -2.763965 | 6.558792  | 0.468834  |
| 38 | 1 | 0 | -1.169346 | 0.772372  | 0.550133  |
| 39 | 1 | 0 | 0.439559  | 2.446316  | -0.192790 |
| 40 | 6 | 0 | 1.421217  | -1.502397 | 0.560250  |
| 41 | 6 | 0 | 1.160118  | -1.946207 | 1.956182  |
| 42 | 6 | 0 | -0.143551 | -1.953821 | 2.475793  |
| 43 | 6 | 0 | 2.210968  | -2.378804 | 2.776891  |
| 44 | 6 | 0 | -0.389039 | -2.392559 | 3.774358  |
| 45 | 6 | 0 | 1.964589  | -2.810912 | 4.078446  |
| 46 | 6 | 0 | 0.665372  | -2.819572 | 4.580888  |
| 47 | 6 | 0 | 2.348082  | -3.680323 | -0.257401 |
| 48 | 6 | 0 | 2.002986  | -2.282764 | -0.383203 |
| 49 | 6 | 0 | 2.953400  | -4.387017 | -1.234392 |
| 50 | 6 | 0 | 3.313377  | -5.810940 | -1.183243 |
| 51 | 6 | 0 | 2.629684  | -6.706796 | -0.457128 |
| 52 | 6 | 0 | 4.498279  | -6.214900 | -2.029743 |
| 53 | 1 | 0 | -0.968514 | -1.645030 | 1.843773  |
| 54 | 1 | 0 | 3.222902  | -2.372365 | 2.389345  |
| 55 | 1 | 0 | -1.404741 | -2.416770 | 4.153462  |
| 56 | 1 | 0 | 2.788920  | -3.142900 | 4.698907  |
| 57 | 1 | 0 | 0.473951  | -3.162669 | 5.590817  |

|    |   |   |           |           |           |
|----|---|---|-----------|-----------|-----------|
| 58 | 1 | 0 | 2.110314  | -4.175107 | 0.678869  |
| 59 | 1 | 0 | 2.203886  | -1.829480 | -1.353217 |
| 60 | 1 | 0 | 3.242165  | -3.860987 | -2.143906 |
| 61 | 1 | 0 | 1.747546  | -6.433155 | 0.110229  |
| 62 | 1 | 0 | 2.927345  | -7.748241 | -0.423663 |
| 63 | 1 | 0 | 5.401527  | -5.676025 | -1.725432 |
| 64 | 1 | 0 | 4.322819  | -5.972789 | -3.083789 |
| 65 | 1 | 0 | 4.696252  | -7.284802 | -1.956365 |
| 66 | 6 | 0 | 4.548107  | 2.710673  | -2.882739 |
| 67 | 6 | 0 | 3.174748  | 2.364766  | -2.846744 |
| 68 | 8 | 0 | 2.346892  | 2.431510  | -3.919022 |
| 69 | 6 | 0 | 2.869050  | 2.855267  | -5.180098 |
| 70 | 1 | 0 | 3.656678  | 2.182110  | -5.531154 |
| 71 | 1 | 0 | 2.029276  | 2.817529  | -5.870577 |
| 72 | 1 | 0 | 5.007710  | 3.053188  | -3.799480 |
| 73 | 1 | 0 | 6.353580  | 2.861089  | -1.737407 |
| 74 | 1 | 0 | 1.547930  | 1.681347  | -1.718061 |
| 75 | 1 | 0 | 3.250219  | 3.879546  | -5.129485 |
| 76 | 6 | 0 | -4.198616 | -2.941922 | -1.757875 |
| 77 | 6 | 0 | -2.776370 | -3.412486 | -1.698232 |
| 78 | 6 | 0 | -2.041104 | -2.484261 | -1.087999 |
| 79 | 6 | 0 | -2.930228 | -1.341244 | -0.704636 |
| 80 | 7 | 0 | -4.205759 | -1.658273 | -1.132040 |
| 81 | 8 | 0 | -5.154429 | -3.497098 | -2.217777 |
| 82 | 8 | 0 | -2.608616 | -0.319184 | -0.116940 |
| 83 | 6 | 0 | -5.370376 | -0.838545 | -0.977443 |
| 84 | 6 | 0 | -5.401229 | 0.434216  | -1.546413 |
| 85 | 6 | 0 | -6.471146 | -1.331410 | -0.279280 |
| 86 | 6 | 0 | -6.537950 | 1.224075  | -1.399091 |
| 87 | 6 | 0 | -7.642789 | 0.738163  | -0.702120 |
| 88 | 6 | 0 | -7.608994 | -0.539945 | -0.148857 |
| 89 | 1 | 0 | -2.476648 | -4.366964 | -2.105086 |
| 90 | 1 | 0 | -0.983859 | -2.490224 | -0.862964 |
| 91 | 1 | 0 | -4.549688 | 0.792705  | -2.111581 |
| 92 | 1 | 0 | -6.441611 | -2.327006 | 0.144693  |
| 93 | 1 | 0 | -6.567521 | 2.211169  | -1.845439 |
| 94 | 1 | 0 | -8.531398 | 1.349667  | -0.599902 |
| 95 | 1 | 0 | -8.469922 | -0.925239 | 0.384118  |

---

#### 2-4-TS-exo

Energy + zep (gas) = -2109.78958 au

Gibbs free energy (gas) = -2109.87100 au

Gibbs free energy (in solvent) = -2109.12166 au

Zero-point correction = 0.79349 au

Thermal correction to Gibbs free energy = 0.71207 au

Standard orientation:

| Center<br>Number | Atomic<br>Number | Atomic<br>Type | Coordinates (Angstroms) |           |           |
|------------------|------------------|----------------|-------------------------|-----------|-----------|
|                  |                  |                | X                       | Y         | Z         |
| 1                | 7                | 0              | 0.488174                | 1.625659  | -0.609428 |
| 2                | 6                | 0              | 1.901898                | 1.215401  | -0.206055 |
| 3                | 6                | 0              | -0.146814               | 2.572800  | 0.387838  |
| 4                | 6                | 0              | 0.549848                | 2.292590  | -1.968025 |
| 5                | 6                | 0              | 1.920505                | 0.133019  | 0.913021  |
| 6                | 6                | 0              | 2.670942                | 2.513115  | 0.131991  |
| 7                | 6                | 0              | 0.621464                | 3.911244  | 0.373519  |
| 8                | 6                | 0              | 1.528939                | 3.500441  | -1.924589 |
| 9                | 6                | 0              | 3.326451                | -0.094313 | 1.468872  |
| 10               | 6                | 0              | 1.916261                | 3.729473  | -0.437848 |
| 11               | 6                | 0              | 4.407338                | -0.640001 | 0.701861  |
| 12               | 6                | 0              | 3.562165                | 0.215261  | 2.789088  |
| 13               | 6                | 0              | 5.655756                | -0.821161 | 1.388102  |
| 14               | 6                | 0              | 4.837687                | 0.000882  | 3.361263  |
| 15               | 7                | 0              | 5.850345                | -0.498074 | 2.694886  |
| 16               | 1                | 0              | -0.120981               | 2.081555  | 1.358409  |
| 17               | 1                | 0              | -1.190764               | 2.661987  | 0.093885  |
| 18               | 1                | 0              | -0.471711               | 2.578704  | -2.210898 |
| 19               | 1                | 0              | 0.861589                | 1.529588  | -2.681345 |
| 20               | 1                | 0              | 1.317431                | 0.497690  | 1.744406  |
| 21               | 1                | 0              | 3.683237                | 2.443037  | -0.266365 |
| 22               | 1                | 0              | 2.772332                | 2.626023  | 1.214543  |
| 23               | 1                | 0              | 0.006670                | 4.701442  | -0.063390 |
| 24               | 1                | 0              | 0.853707                | 4.214901  | 1.396095  |
| 25               | 1                | 0              | 0.984733                | 4.387382  | -2.259679 |
| 26               | 1                | 0              | 2.539297                | 4.621387  | -0.363308 |
| 27               | 6                | 0              | 4.338542                | -1.014340 | -0.660516 |
| 28               | 1                | 0              | 2.769513                | 0.616712  | 3.411105  |
| 29               | 6                | 0              | 6.756100                | -1.364538 | 0.681286  |
| 30               | 1                | 0              | 5.010942                | 0.251313  | 4.404315  |
| 31               | 7                | 0              | 1.307346                | -1.114010 | 0.470003  |
| 32               | 1                | 0              | 1.808923                | -1.631230 | -0.237780 |
| 33               | 6                | 0              | 3.049070                | 4.170966  | -3.802337 |
| 34               | 1                | 0              | 3.913895                | 4.002897  | -4.432947 |
| 35               | 6                | 0              | 2.711854                | 3.317177  | -2.841136 |
| 36               | 1                | 0              | 3.317744                | 2.424826  | -2.692505 |
| 37               | 1                | 0              | 2.473577                | 5.071472  | -3.994075 |

|    |   |   |           |           |           |
|----|---|---|-----------|-----------|-----------|
| 38 | 1 | 0 | -0.155825 | 0.821936  | -0.721340 |
| 39 | 1 | 0 | 2.312420  | 0.773835  | -1.113030 |
| 40 | 6 | 0 | 0.040419  | -1.566426 | 0.763058  |
| 41 | 6 | 0 | -0.587207 | -1.058631 | 2.023275  |
| 42 | 6 | 0 | -1.704065 | -0.217149 | 2.045182  |
| 43 | 6 | 0 | -0.031977 | -1.485722 | 3.239996  |
| 44 | 6 | 0 | -2.256975 | 0.187620  | 3.260713  |
| 45 | 6 | 0 | -0.590077 | -1.083496 | 4.449283  |
| 46 | 6 | 0 | -1.704204 | -0.244703 | 4.462872  |
| 47 | 6 | 0 | -1.853434 | -2.993561 | 0.043846  |
| 48 | 6 | 0 | -0.512774 | -2.551582 | -0.019637 |
| 49 | 6 | 0 | -2.376538 | -4.046744 | -0.689178 |
| 50 | 6 | 0 | -3.750725 | -4.271450 | -0.902523 |
| 51 | 6 | 0 | -4.700254 | -3.291929 | -0.579960 |
| 52 | 6 | 0 | -4.185939 | -5.486871 | -1.680327 |
| 53 | 1 | 0 | -2.133191 | 0.129665  | 1.115132  |
| 54 | 1 | 0 | 0.825716  | -2.148570 | 3.233091  |
| 55 | 1 | 0 | -3.122387 | 0.840134  | 3.258833  |
| 56 | 1 | 0 | -0.160715 | -1.433660 | 5.380771  |
| 57 | 1 | 0 | -2.139890 | 0.064651  | 5.405636  |
| 58 | 1 | 0 | -2.506951 | -2.472771 | 0.734506  |
| 59 | 1 | 0 | 0.102909  | -2.953222 | -0.822403 |
| 60 | 1 | 0 | -1.677959 | -4.692539 | -1.216175 |
| 61 | 1 | 0 | -4.496056 | -2.604050 | 0.231602  |
| 62 | 1 | 0 | -5.753117 | -3.514112 | -0.714936 |
| 63 | 1 | 0 | -4.564150 | -6.256156 | -0.998077 |
| 64 | 1 | 0 | -3.363208 | -5.927662 | -2.246677 |
| 65 | 1 | 0 | -4.999136 | -5.250219 | -2.371753 |
| 66 | 6 | 0 | 6.660495  | -1.721537 | -0.639773 |
| 67 | 6 | 0 | 5.432698  | -1.543383 | -1.324789 |
| 68 | 8 | 0 | 5.238160  | -1.859338 | -2.627918 |
| 69 | 6 | 0 | 6.315883  | -2.420469 | -3.381651 |
| 70 | 1 | 0 | 6.640207  | -3.376288 | -2.960090 |
| 71 | 1 | 0 | 5.917695  | -2.583989 | -4.380592 |
| 72 | 1 | 0 | 7.520836  | -2.134977 | -1.147597 |
| 73 | 1 | 0 | 7.681065  | -1.488066 | 1.230432  |
| 74 | 1 | 0 | 3.438732  | -0.903235 | -1.251005 |
| 75 | 1 | 0 | 7.163134  | -1.730748 | -3.437744 |
| 76 | 6 | 0 | -5.187474 | -0.732766 | -1.379471 |
| 77 | 6 | 0 | -4.426149 | -1.847054 | -2.054822 |
| 78 | 6 | 0 | -3.098276 | -1.425391 | -2.145534 |
| 79 | 6 | 0 | -2.932183 | -0.194066 | -1.438586 |
| 80 | 7 | 0 | -4.209898 | 0.199317  | -0.955966 |
| 81 | 8 | 0 | -6.373487 | -0.633280 | -1.203456 |



|    |   |   |           |           |           |
|----|---|---|-----------|-----------|-----------|
| 82 | 8 | 0 | -1.903269 | 0.467995  | -1.224934 |
| 83 | 6 | 0 | -4.509367 | 1.413539  | -0.275757 |
| 84 | 6 | 0 | -4.055804 | 2.634450  | -0.782949 |
| 85 | 6 | 0 | -5.289338 | 1.388401  | 0.882540  |
| 86 | 6 | 0 | -4.361537 | 3.818996  | -0.117380 |
| 87 | 6 | 0 | -5.134620 | 3.795841  | 1.042110  |
| 88 | 6 | 0 | -5.604666 | 2.579233  | 1.532207  |
| 89 | 1 | 0 | -4.943567 | -2.419976 | -2.811460 |
| 90 | 1 | 0 | -2.294224 | -1.887593 | -2.692524 |
| 91 | 1 | 0 | -3.490962 | 2.650868  | -1.706073 |
| 92 | 1 | 0 | -5.667508 | 0.444953  | 1.253994  |
| 93 | 1 | 0 | -4.019595 | 4.765042  | -0.522072 |
| 94 | 1 | 0 | -5.385176 | 4.720389  | 1.548547  |
| 95 | 1 | 0 | -6.225705 | 2.554417  | 2.420075  |

#### 2-4-IM-exo

Energy + zep (gas) = -2109.84909 au

Gibbs free energy (gas) = -2109.92898 au

Gibbs free energy (in solvent) = -2109.19746 au

Zero-point correction = 0.79967 au

Thermal correction to Gibbs free energy = 0.71978 au

Standard orientation:

| Center<br>Number | Atomic<br>Number | Atomic<br>Type | Coordinates (Angstroms) |           |           |
|------------------|------------------|----------------|-------------------------|-----------|-----------|
|                  |                  |                | X                       | Y         | Z         |
| 1                | 7                | 0              | 0.463365                | 1.638661  | -0.060983 |
| 2                | 6                | 0              | 1.937314                | 1.259214  | 0.118739  |
| 3                | 6                | 0              | -0.100251               | 2.368758  | 1.140673  |
| 4                | 6                | 0              | 0.335041                | 2.516110  | -1.289461 |
| 5                | 6                | 0              | 2.138766                | 0.016644  | 1.039676  |
| 6                | 6                | 0              | 2.674153                | 2.538818  | 0.577193  |
| 7                | 6                | 0              | 0.601148                | 3.737049  | 1.272481  |
| 8                | 6                | 0              | 1.250512                | 3.765883  | -1.146817 |
| 9                | 6                | 0              | 3.614721                | -0.186361 | 1.380648  |
| 10               | 6                | 0              | 1.798342                | 3.776408  | 0.306062  |
| 11               | 6                | 0              | 4.617186                | -0.524029 | 0.413124  |
| 12               | 6                | 0              | 4.004966                | -0.062320 | 2.694459  |
| 13               | 6                | 0              | 5.955549                | -0.697883 | 0.903662  |
| 14               | 6                | 0              | 5.355773                | -0.254586 | 3.066532  |
| 15               | 7                | 0              | 6.302189                | -0.558028 | 2.211744  |
| 16               | 1                | 0              | 0.052630                | 1.727933  | 2.006610  |
| 17               | 1                | 0              | -1.171692               | 2.444555  | 0.966049  |

|    |   |   |           |           |           |
|----|---|---|-----------|-----------|-----------|
| 18 | 1 | 0 | -0.720097 | 2.767218  | -1.373842 |
| 19 | 1 | 0 | 0.605598  | 1.900004  | -2.147306 |
| 20 | 1 | 0 | 1.635494  | 0.222504  | 1.986982  |
| 21 | 1 | 0 | 3.633471  | 2.602387  | 0.063545  |
| 22 | 1 | 0 | 2.899453  | 2.483655  | 1.645491  |
| 23 | 1 | 0 | -0.095807 | 4.547331  | 1.047056  |
| 24 | 1 | 0 | 0.939178  | 3.881249  | 2.300383  |
| 25 | 1 | 0 | 0.625561  | 4.654954  | -1.266067 |
| 26 | 1 | 0 | 2.379786  | 4.685607  | 0.462772  |
| 27 | 6 | 0 | 4.390156  | -0.703069 | -0.971681 |
| 28 | 1 | 0 | 3.278311  | 0.174434  | 3.464072  |
| 29 | 6 | 0 | 6.983988  | -1.035174 | -0.009451 |
| 30 | 1 | 0 | 5.648821  | -0.152170 | 4.107971  |
| 31 | 7 | 0 | 1.548862  | -1.218688 | 0.524475  |
| 32 | 1 | 0 | 1.966841  | -1.555243 | -0.331251 |
| 33 | 6 | 0 | 2.496918  | 4.832828  | -3.042727 |
| 34 | 1 | 0 | 3.289811  | 4.830225  | -3.781105 |
| 35 | 6 | 0 | 2.324911  | 3.817103  | -2.202856 |
| 36 | 1 | 0 | 2.994818  | 2.961364  | -2.266948 |
| 37 | 1 | 0 | 1.852931  | 5.706796  | -3.022163 |
| 38 | 1 | 0 | -0.127139 | 0.809200  | -0.225012 |
| 39 | 1 | 0 | 2.255512  | 0.992969  | -0.888477 |
| 40 | 6 | 0 | 0.158142  | -1.457751 | 0.618313  |
| 41 | 6 | 0 | -0.375683 | -1.445166 | 2.013911  |
| 42 | 6 | 0 | -1.537245 | -0.748041 | 2.373733  |
| 43 | 6 | 0 | 0.311047  | -2.162801 | 3.005839  |
| 44 | 6 | 0 | -2.008913 | -0.781870 | 3.685244  |
| 45 | 6 | 0 | -0.166059 | -2.201212 | 4.311912  |
| 46 | 6 | 0 | -1.328085 | -1.511407 | 4.656352  |
| 47 | 6 | 0 | -1.954994 | -2.290182 | -0.584652 |
| 48 | 6 | 0 | -0.542886 | -1.787903 | -0.486036 |
| 49 | 6 | 0 | -2.031956 | -3.728815 | -1.071078 |
| 50 | 6 | 0 | -3.201197 | -4.270691 | -1.421842 |
| 51 | 6 | 0 | -4.443175 | -3.410461 | -1.323001 |
| 52 | 6 | 0 | -3.363940 | -5.696990 | -1.861696 |
| 53 | 1 | 0 | -2.065513 | -0.162941 | 1.631473  |
| 54 | 1 | 0 | 1.213413  | -2.698610 | 2.737598  |
| 55 | 1 | 0 | -2.907492 | -0.234843 | 3.947018  |
| 56 | 1 | 0 | 0.366805  | -2.774910 | 5.061407  |
| 57 | 1 | 0 | -1.698110 | -1.541539 | 5.674446  |
| 58 | 1 | 0 | -2.429037 | -2.239335 | 0.402123  |
| 59 | 1 | 0 | -0.006282 | -1.766104 | -1.435354 |
| 60 | 1 | 0 | -1.114804 | -4.308452 | -1.088747 |
| 61 | 1 | 0 | -4.753642 | -3.350903 | -0.271970 |

|    |   |   |           |           |           |
|----|---|---|-----------|-----------|-----------|
| 62 | 1 | 0 | -5.283644 | -3.855724 | -1.857031 |
| 63 | 1 | 0 | -4.051782 | -6.232808 | -1.198128 |
| 64 | 1 | 0 | -2.411243 | -6.229029 | -1.865626 |
| 65 | 1 | 0 | -3.794368 | -5.749948 | -2.867832 |
| 66 | 6 | 0 | 6.734712  | -1.202447 | -1.348266 |
| 67 | 6 | 0 | 5.416333  | -1.034971 | -1.839498 |
| 68 | 8 | 0 | 5.067479  | -1.179238 | -3.142465 |
| 69 | 6 | 0 | 6.064176  | -1.554107 | -4.095243 |
| 70 | 1 | 0 | 6.499785  | -2.527993 | -3.853276 |
| 71 | 1 | 0 | 5.545417  | -1.619128 | -5.049252 |
| 72 | 1 | 0 | 7.544195  | -1.462315 | -2.016310 |
| 73 | 1 | 0 | 7.980608  | -1.158613 | 0.395441  |
| 74 | 1 | 0 | 3.409584  | -0.600370 | -1.415987 |
| 75 | 1 | 0 | 6.853859  | -0.799886 | -4.163687 |
| 76 | 6 | 0 | -5.164273 | -0.964704 | -1.291860 |
| 77 | 6 | 0 | -4.190943 | -1.983575 | -1.865118 |
| 78 | 6 | 0 | -2.791826 | -1.407276 | -1.569611 |
| 79 | 6 | 0 | -3.049713 | -0.011852 | -1.026238 |
| 80 | 7 | 0 | -4.409694 | 0.172142  | -0.877323 |
| 81 | 8 | 0 | -6.353331 | -1.060127 | -1.180810 |
| 82 | 8 | 0 | -2.201550 | 0.821170  | -0.737276 |
| 83 | 6 | 0 | -5.013587 | 1.363892  | -0.349184 |
| 84 | 6 | 0 | -4.809880 | 2.584283  | -0.991476 |
| 85 | 6 | 0 | -5.817109 | 1.282444  | 0.786337  |
| 86 | 6 | 0 | -5.405489 | 3.734244  | -0.481360 |
| 87 | 6 | 0 | -6.207748 | 3.662575  | 0.656014  |
| 88 | 6 | 0 | -6.414796 | 2.436947  | 1.284851  |
| 89 | 1 | 0 | -4.359545 | -1.995145 | -2.946126 |
| 90 | 1 | 0 | -2.206016 | -1.304593 | -2.486931 |
| 91 | 1 | 0 | -4.202735 | 2.628579  | -1.887009 |
| 92 | 1 | 0 | -5.988217 | 0.324997  | 1.260941  |
| 93 | 1 | 0 | -5.255370 | 4.683534  | -0.982077 |
| 94 | 1 | 0 | -6.679062 | 4.557660  | 1.044297  |
| 95 | 1 | 0 | -7.048775 | 2.375049  | 2.161236  |

---

### 2-5-COM-endo

Energy + zep (gas) = -2109.80412 au

Gibbs free energy (gas) = -2109.89170 au

Gibbs free energy (in solvent) = -2109.14140 au

Zero-point correction = 0.79345 au

Thermal correction to Gibbs free energy = 0.70588 au

Standard orientation:

---

| Center<br>Number | Atomic<br>Number | Atomic<br>Type | Coordinates (Angstroms) |           |           |
|------------------|------------------|----------------|-------------------------|-----------|-----------|
|                  |                  |                | X                       | Y         | Z         |
| 1                | 6                | 0              | -3.083605               | 1.459225  | -0.865213 |
| 2                | 6                | 0              | -2.858346               | 2.708042  | -1.659748 |
| 3                | 6                | 0              | -3.811190               | 3.588204  | -1.353749 |
| 4                | 6                | 0              | -4.724232               | 2.980011  | -0.333797 |
| 5                | 7                | 0              | -4.210138               | 1.667714  | -0.093296 |
| 6                | 8                | 0              | -2.409394               | 0.439666  | -0.884194 |
| 7                | 8                | 0              | -5.685492               | 3.454960  | 0.198239  |
| 8                | 6                | 0              | -4.793211               | 0.726519  | 0.815428  |
| 9                | 6                | 0              | -4.816426               | 1.010074  | 2.179983  |
| 10               | 6                | 0              | -5.358617               | -0.450007 | 0.325134  |
| 11               | 6                | 0              | -5.404976               | 0.103571  | 3.058462  |
| 12               | 6                | 0              | -5.958680               | -1.080968 | 2.577205  |
| 13               | 6                | 0              | -5.934780               | -1.356710 | 1.211126  |
| 14               | 1                | 0              | -5.434504               | 0.327159  | 4.118109  |
| 15               | 1                | 0              | -4.392785               | 1.936994  | 2.546215  |
| 16               | 1                | 0              | -6.419179               | -1.781535 | 3.263596  |
| 17               | 1                | 0              | -6.382966               | -2.267740 | 0.832236  |
| 18               | 1                | 0              | -5.366523               | -0.639211 | -0.741616 |
| 19               | 1                | 0              | -2.022298               | 2.816359  | -2.334271 |
| 20               | 7                | 0              | -0.770780               | -1.780322 | -1.290753 |
| 21               | 6                | 0              | 0.141943                | -2.554029 | -0.335031 |
| 22               | 6                | 0              | -0.178524               | -1.567119 | -2.670928 |
| 23               | 6                | 0              | -2.064310               | -2.559091 | -1.427472 |
| 24               | 6                | 0              | 1.302031                | -1.784375 | 0.357370  |
| 25               | 6                | 0              | 0.631543                | -3.799870 | -1.106573 |
| 26               | 6                | 0              | 0.012415                | -2.935414 | -3.357437 |
| 27               | 6                | 0              | -1.766710               | -3.995733 | -1.947481 |
| 28               | 6                | 0              | 0.901363                | -0.926446 | 1.563523  |
| 29               | 6                | 0              | -0.263247               | -4.050231 | -2.333768 |
| 30               | 6                | 0              | -0.401656               | -0.578884 | 1.838320  |
| 31               | 6                | 0              | 1.905998                | -0.520410 | 2.504320  |
| 32               | 6                | 0              | -0.717730               | 0.185102  | 2.986834  |
| 33               | 6                | 0              | 1.472908                | 0.255058  | 3.631964  |
| 34               | 7                | 0              | 0.175268                | 0.600988  | 3.850586  |
| 35               | 1                | 0              | 0.746804                | -1.017866 | -2.537691 |
| 36               | 1                | 0              | -0.883677               | -0.922474 | -3.194708 |
| 37               | 1                | 0              | -2.693547               | -1.989066 | -2.108619 |
| 38               | 1                | 0              | -2.545541               | -2.557079 | -0.450120 |
| 39               | 1                | 0              | 1.857286                | -2.619260 | 0.802501  |
| 40               | 1                | 0              | 0.635065                | -4.656670 | -0.430540 |
| 41               | 1                | 0              | 1.660401                | -3.647000 | -1.442137 |

|    |   |   |           |           |           |
|----|---|---|-----------|-----------|-----------|
| 42 | 1 | 0 | -0.657698 | -3.033719 | -4.214485 |
| 43 | 1 | 0 | 1.032471  | -3.017243 | -3.737288 |
| 44 | 1 | 0 | -2.342990 | -4.147963 | -2.863989 |
| 45 | 1 | 0 | -0.040495 | -5.025534 | -2.767911 |
| 46 | 1 | 0 | -1.226580 | -0.852520 | 1.192770  |
| 47 | 6 | 0 | 3.272994  | -0.855519 | 2.407792  |
| 48 | 1 | 0 | -1.753411 | 0.451895  | 3.179674  |
| 49 | 6 | 0 | 2.431253  | 0.672743  | 4.586084  |
| 50 | 6 | 0 | 3.756472  | 0.338812  | 4.465983  |
| 51 | 6 | 0 | 4.185319  | -0.444408 | 3.364544  |
| 52 | 1 | 0 | 2.073165  | 1.259788  | 5.422465  |
| 53 | 1 | 0 | 4.462357  | 0.668974  | 5.215533  |
| 54 | 8 | 0 | 5.467170  | -0.835224 | 3.167790  |
| 55 | 1 | 0 | 3.663921  | -1.441975 | 1.588917  |
| 56 | 6 | 0 | 6.470019  | -0.454138 | 4.110394  |
| 57 | 1 | 0 | 6.257197  | -0.858333 | 5.104651  |
| 58 | 1 | 0 | 7.397151  | -0.884633 | 3.738318  |
| 59 | 1 | 0 | 6.572974  | 0.633881  | 4.165004  |
| 60 | 6 | 0 | -3.024493 | -6.050100 | -1.250032 |
| 61 | 1 | 0 | -3.288149 | -6.799734 | -0.513548 |
| 62 | 6 | 0 | -2.183663 | -5.060750 | -0.965425 |
| 63 | 1 | 0 | -1.760267 | -5.002554 | 0.036013  |
| 64 | 1 | 0 | -3.479021 | -6.149811 | -2.231057 |
| 65 | 1 | 0 | -1.026533 | -0.855132 | -0.922662 |
| 66 | 1 | 0 | -0.530172 | -2.867763 | 0.464160  |
| 67 | 6 | 0 | 2.337838  | 0.131385  | -1.043970 |
| 68 | 7 | 0 | 2.260713  | -1.196456 | -0.587767 |
| 69 | 1 | 0 | 3.172473  | -1.624726 | -0.541483 |
| 70 | 6 | 0 | 3.568703  | 0.372929  | -1.848743 |
| 71 | 6 | 0 | 4.383104  | 1.483094  | -1.582707 |
| 72 | 6 | 0 | 3.963360  | -0.522355 | -2.855205 |
| 73 | 6 | 0 | 5.546840  | 1.699327  | -2.314305 |
| 74 | 1 | 0 | 4.107839  | 2.165353  | -0.788219 |
| 75 | 6 | 0 | 5.125274  | -0.301416 | -3.589031 |
| 76 | 1 | 0 | 3.349281  | -1.388469 | -3.075957 |
| 77 | 6 | 0 | 5.919911  | 0.811030  | -3.320954 |
| 78 | 1 | 0 | 6.167230  | 2.559769  | -2.092276 |
| 79 | 1 | 0 | 5.408658  | -0.995356 | -4.372001 |
| 80 | 1 | 0 | 6.826055  | 0.981979  | -3.890122 |
| 81 | 6 | 0 | 1.347410  | 2.390192  | -1.437528 |
| 82 | 6 | 0 | 1.388740  | 1.080057  | -0.826755 |
| 83 | 1 | 0 | 2.020957  | 2.582789  | -2.266933 |
| 84 | 1 | 0 | 0.584841  | 0.862921  | -0.135064 |
| 85 | 6 | 0 | 0.527050  | 3.383390  | -1.031444 |

|    |   |   |           |          |           |
|----|---|---|-----------|----------|-----------|
| 86 | 6 | 0 | 0.410269  | 4.712236 | -1.649530 |
| 87 | 6 | 0 | 0.567516  | 4.917917 | -2.966168 |
| 88 | 6 | 0 | 0.083464  | 5.846495 | -0.705557 |
| 89 | 1 | 0 | 0.871150  | 5.969307 | 0.044817  |
| 90 | 1 | 0 | -0.034104 | 6.791530 | -1.237298 |
| 91 | 1 | 0 | -0.073170 | 3.221494 | -0.136504 |
| 92 | 1 | 0 | -0.843538 | 5.644678 | -0.157070 |
| 93 | 1 | 0 | 0.764733  | 4.102569 | -3.653202 |
| 94 | 1 | 0 | 0.508367  | 5.912694 | -3.392251 |
| 95 | 1 | 0 | -3.962998 | 4.589890 | -1.727514 |

**2-5-TS-endo**

Energy + zep (gas) = -2109.78524 au

Gibbs free energy (gas) = -2109.86494 au

Gibbs free energy (in solvent) = -2109.11934 au

Zero-point correction = 0.79418 au

Thermal correction to Gibbs free energy = 0.71448 au

Standard orientation:

| Center<br>Number | Atomic<br>Number | Atomic<br>Type | Coordinates (Angstroms) |           |           |
|------------------|------------------|----------------|-------------------------|-----------|-----------|
|                  |                  |                | X                       | Y         | Z         |
| 1                | 6                | 0              | 2.776995                | 0.002023  | -0.924129 |
| 2                | 6                | 0              | 2.693762                | -0.619456 | -2.217510 |
| 3                | 6                | 0              | 3.708836                | -1.562988 | -2.341572 |
| 4                | 6                | 0              | 4.567242                | -1.450410 | -1.108227 |
| 5                | 7                | 0              | 3.895523                | -0.541359 | -0.258568 |
| 6                | 8                | 0              | 2.063967                | 0.885528  | -0.418954 |
| 7                | 8                | 0              | 5.603932                | -2.011005 | -0.861111 |
| 8                | 6                | 0              | 4.368789                | -0.135928 | 1.028010  |
| 9                | 6                | 0              | 4.729742                | -1.099692 | 1.970261  |
| 10               | 6                | 0              | 4.495144                | 1.221199  | 1.332824  |
| 11               | 6                | 0              | 5.209566                | -0.704088 | 3.215500  |
| 12               | 6                | 0              | 5.321867                | 0.648073  | 3.530032  |
| 13               | 6                | 0              | 4.963343                | 1.607508  | 2.585263  |
| 14               | 1                | 0              | 5.497298                | -1.456889 | 3.939893  |
| 15               | 1                | 0              | 4.654192                | -2.149201 | 1.723454  |
| 16               | 1                | 0              | 5.695788                | 0.952134  | 4.500523  |
| 17               | 1                | 0              | 5.063434                | 2.661682  | 2.817080  |
| 18               | 1                | 0              | 4.234436                | 1.964273  | 0.591812  |
| 19               | 1                | 0              | 1.990918                | -0.308438 | -2.973533 |
| 20               | 7                | 0              | -0.024882               | 2.459276  | -0.878297 |
| 21               | 6                | 0              | -1.326539               | 2.546733  | -0.087934 |

|    |   |   |           |           |           |
|----|---|---|-----------|-----------|-----------|
| 22 | 6 | 0 | -0.229502 | 2.325315  | -2.371947 |
| 23 | 6 | 0 | 0.754332  | 3.729948  | -0.609954 |
| 24 | 6 | 0 | -2.070249 | 1.229417  | 0.285258  |
| 25 | 6 | 0 | -2.225990 | 3.556988  | -0.833708 |
| 26 | 6 | 0 | -0.885306 | 3.607664  | -2.925408 |
| 27 | 6 | 0 | -0.107136 | 4.973904  | -0.980727 |
| 28 | 6 | 0 | -1.615696 | 0.578298  | 1.596332  |
| 29 | 6 | 0 | -1.363785 | 4.458959  | -1.736831 |
| 30 | 6 | 0 | -0.390210 | 0.824288  | 2.172702  |
| 31 | 6 | 0 | -2.523000 | -0.280502 | 2.299502  |
| 32 | 6 | 0 | -0.045167 | 0.225293  | 3.407780  |
| 33 | 6 | 0 | -2.071514 | -0.825494 | 3.547814  |
| 34 | 7 | 0 | -0.844650 | -0.570431 | 4.076542  |
| 35 | 1 | 0 | -0.836196 | 1.440514  | -2.528589 |
| 36 | 1 | 0 | 0.759372  | 2.140201  | -2.789845 |
| 37 | 1 | 0 | 1.667133  | 3.662007  | -1.200328 |
| 38 | 1 | 0 | 1.037024  | 3.718235  | 0.442356  |
| 39 | 1 | 0 | -3.070612 | 1.611310  | 0.517675  |
| 40 | 1 | 0 | -2.786942 | 4.138037  | -0.099567 |
| 41 | 1 | 0 | -2.959024 | 3.030703  | -1.452873 |
| 42 | 1 | 0 | -0.178750 | 4.171745  | -3.538566 |
| 43 | 1 | 0 | -1.727876 | 3.345073  | -3.568728 |
| 44 | 1 | 0 | 0.466813  | 5.580823  | -1.685881 |
| 45 | 1 | 0 | -1.946674 | 5.310999  | -2.088225 |
| 46 | 1 | 0 | 0.361936  | 1.436249  | 1.690965  |
| 47 | 6 | 0 | -3.821448 | -0.605675 | 1.853270  |
| 48 | 1 | 0 | 0.932660  | 0.418689  | 3.839866  |
| 49 | 6 | 0 | -2.942090 | -1.667016 | 4.281417  |
| 50 | 6 | 0 | -4.201783 | -1.966586 | 3.827755  |
| 51 | 6 | 0 | -4.652477 | -1.426917 | 2.595912  |
| 52 | 1 | 0 | -2.574487 | -2.061540 | 5.220383  |
| 53 | 1 | 0 | -4.843132 | -2.609878 | 4.414344  |
| 54 | 8 | 0 | -5.877826 | -1.663839 | 2.069446  |
| 55 | 1 | 0 | -4.215763 | -0.235991 | 0.916968  |
| 56 | 6 | 0 | -6.799951 | -2.489576 | 2.782406  |
| 57 | 1 | 0 | -7.044193 | -2.061916 | 3.759396  |
| 58 | 1 | 0 | -7.697508 | -2.520247 | 2.168574  |
| 59 | 1 | 0 | -6.411939 | -3.505066 | 2.906966  |
| 60 | 6 | 0 | -0.115365 | 7.131832  | 0.295592  |
| 61 | 1 | 0 | -0.367864 | 7.718897  | 1.170492  |
| 62 | 6 | 0 | -0.422552 | 5.841363  | 0.211255  |
| 63 | 1 | 0 | -0.933965 | 5.368732  | 1.048193  |
| 64 | 1 | 0 | 0.400403  | 7.650279  | -0.506936 |
| 65 | 1 | 0 | 0.608995  | 1.666964  | -0.604481 |

|    |   |   |           |           |           |
|----|---|---|-----------|-----------|-----------|
| 66 | 1 | 0 | -1.025474 | 2.988240  | 0.861236  |
| 67 | 6 | 0 | -1.565006 | -0.760649 | -1.296048 |
| 68 | 7 | 0 | -2.308405 | 0.325847  | -0.852949 |
| 69 | 1 | 0 | -3.265321 | 0.310157  | -1.171287 |
| 70 | 6 | 0 | -2.111866 | -1.380602 | -2.532142 |
| 71 | 6 | 0 | -2.167217 | -2.778398 | -2.656196 |
| 72 | 6 | 0 | -2.629571 | -0.597683 | -3.578211 |
| 73 | 6 | 0 | -2.697266 | -3.369447 | -3.798372 |
| 74 | 1 | 0 | -1.822493 | -3.398379 | -1.838692 |
| 75 | 6 | 0 | -3.154896 | -1.191375 | -4.721261 |
| 76 | 1 | 0 | -2.611191 | 0.483816  | -3.507651 |
| 77 | 6 | 0 | -3.187746 | -2.579556 | -4.836141 |
| 78 | 1 | 0 | -2.739982 | -4.449758 | -3.871471 |
| 79 | 1 | 0 | -3.537421 | -0.570893 | -5.523252 |
| 80 | 1 | 0 | -3.601472 | -3.042091 | -5.724361 |
| 81 | 6 | 0 | 0.509196  | -2.148368 | -1.181543 |
| 82 | 6 | 0 | -0.444882 | -1.225827 | -0.657888 |
| 83 | 1 | 0 | 0.489236  | -2.358221 | -2.244591 |
| 84 | 1 | 0 | -0.230668 | -0.849820 | 0.330430  |
| 85 | 6 | 0 | 1.389457  | -2.845735 | -0.372795 |
| 86 | 6 | 0 | 2.506728  | -3.585346 | -0.813381 |
| 87 | 6 | 0 | 2.952399  | -3.510789 | -2.138167 |
| 88 | 6 | 0 | 3.334600  | -4.346840 | 0.190890  |
| 89 | 1 | 0 | 3.169768  | -5.423085 | 0.071463  |
| 90 | 1 | 0 | 4.402452  | -4.168333 | 0.039024  |
| 91 | 1 | 0 | 1.250737  | -2.760435 | 0.701914  |
| 92 | 1 | 0 | 3.072204  | -4.085720 | 1.217546  |
| 93 | 1 | 0 | 2.248556  | -3.324160 | -2.938780 |
| 94 | 1 | 0 | 3.813180  | -4.106131 | -2.423569 |
| 95 | 1 | 0 | 4.185998  | -1.845556 | -3.269587 |

-----

**2-5-IM-endo**

Energy + zep (gas) = -2109.84134 au

Gibbs free energy (gas) = -2109.92112 au

Gibbs free energy (in solvent) = -2109.19222 au

Zero-point correction = 0.80013 au

Thermal correction to Gibbs free energy = 0.72035 au

Standard orientation:

-----

| Center<br>Number | Atomic<br>Number | Atomic<br>Type | Coordinates (Angstroms) |           |           |
|------------------|------------------|----------------|-------------------------|-----------|-----------|
|                  |                  |                | X                       | Y         | Z         |
| 1                | 6                | 0              | 2.643822                | -0.605679 | -0.718419 |

-----



|    |   |   |           |           |           |
|----|---|---|-----------|-----------|-----------|
| 2  | 6 | 0 | 1.948342  | -1.575614 | -1.664468 |
| 3  | 6 | 0 | 2.922493  | -2.771293 | -1.771513 |
| 4  | 6 | 0 | 3.986231  | -2.502803 | -0.711221 |
| 5  | 7 | 0 | 3.771519  | -1.194397 | -0.200194 |
| 6  | 8 | 0 | 2.290932  | 0.538386  | -0.448419 |
| 7  | 8 | 0 | 4.863699  | -3.233324 | -0.348525 |
| 8  | 6 | 0 | 4.641252  | -0.574553 | 0.763152  |
| 9  | 6 | 0 | 4.756840  | -1.129515 | 2.035108  |
| 10 | 6 | 0 | 5.374073  | 0.555002  | 0.406227  |
| 11 | 6 | 0 | 5.614837  | -0.541083 | 2.960282  |
| 12 | 6 | 0 | 6.345591  | 0.593978  | 2.615909  |
| 13 | 6 | 0 | 6.224052  | 1.140809  | 1.339822  |
| 14 | 1 | 0 | 5.714925  | -0.974191 | 3.948292  |
| 15 | 1 | 0 | 4.191247  | -2.016125 | 2.291323  |
| 16 | 1 | 0 | 7.015058  | 1.046813  | 3.337613  |
| 17 | 1 | 0 | 6.800393  | 2.016706  | 1.066190  |
| 18 | 1 | 0 | 5.287417  | 0.962342  | -0.593559 |
| 19 | 1 | 0 | 1.834083  | -1.060147 | -2.621721 |
| 20 | 7 | 0 | 0.400669  | 2.472546  | -0.900758 |
| 21 | 6 | 0 | -0.896612 | 2.796230  | -0.156591 |
| 22 | 6 | 0 | 0.211814  | 2.330210  | -2.398895 |
| 23 | 6 | 0 | 1.377063  | 3.597459  | -0.631892 |
| 24 | 6 | 0 | -1.855125 | 1.622889  | 0.197837  |
| 25 | 6 | 0 | -1.586387 | 3.917953  | -0.962566 |
| 26 | 6 | 0 | -0.180174 | 3.695292  | -2.999323 |
| 27 | 6 | 0 | 0.743279  | 4.958733  | -1.048949 |
| 28 | 6 | 0 | -1.567061 | 0.929521  | 1.536905  |
| 29 | 6 | 0 | -0.552631 | 4.642485  | -1.846615 |
| 30 | 6 | 0 | -0.348511 | 0.991929  | 2.173322  |
| 31 | 6 | 0 | -2.622110 | 0.217997  | 2.198119  |
| 32 | 6 | 0 | -0.146970 | 0.340535  | 3.413323  |
| 33 | 6 | 0 | -2.307298 | -0.405201 | 3.452059  |
| 34 | 7 | 0 | -1.078558 | -0.341749 | 4.033125  |
| 35 | 1 | 0 | -0.549836 | 1.572058  | -2.543026 |
| 36 | 1 | 0 | 1.158391  | 1.951241  | -2.782202 |
| 37 | 1 | 0 | 2.280065  | 3.365260  | -1.195067 |
| 38 | 1 | 0 | 1.628482  | 3.562253  | 0.427848  |
| 39 | 1 | 0 | -2.790726 | 2.164519  | 0.374667  |
| 40 | 1 | 0 | -2.073484 | 4.602946  | -0.266316 |
| 41 | 1 | 0 | -2.368379 | 3.493501  | -1.599105 |
| 42 | 1 | 0 | 0.640299  | 4.114132  | -3.586649 |
| 43 | 1 | 0 | -1.027697 | 3.568250  | -3.675670 |
| 44 | 1 | 0 | 1.435086  | 5.451506  | -1.737194 |
| 45 | 1 | 0 | -0.970957 | 5.571610  | -2.234951 |

|    |   |   |           |           |           |
|----|---|---|-----------|-----------|-----------|
| 46 | 1 | 0 | 0.500573  | 1.508658  | 1.741614  |
| 47 | 6 | 0 | -3.942580 | 0.113384  | 1.710273  |
| 48 | 1 | 0 | 0.827600  | 0.390401  | 3.891768  |
| 49 | 6 | 0 | -3.321846 | -1.114269 | 4.138927  |
| 50 | 6 | 0 | -4.596801 | -1.206182 | 3.640348  |
| 51 | 6 | 0 | -4.916974 | -0.577005 | 2.410452  |
| 52 | 1 | 0 | -3.052345 | -1.574812 | 5.081126  |
| 53 | 1 | 0 | -5.349934 | -1.750977 | 4.192810  |
| 54 | 8 | 0 | -6.148612 | -0.600861 | 1.846784  |
| 55 | 1 | 0 | -4.251503 | 0.571195  | 0.780549  |
| 56 | 6 | 0 | -7.212505 | -1.280724 | 2.514204  |
| 57 | 1 | 0 | -7.412670 | -0.841028 | 3.495926  |
| 58 | 1 | 0 | -8.084968 | -1.151081 | 1.877550  |
| 59 | 1 | 0 | -6.998546 | -2.348521 | 2.620989  |
| 60 | 6 | 0 | 1.046994  | 7.107357  | 0.207039  |
| 61 | 1 | 0 | 0.861034  | 7.742615  | 1.064788  |
| 62 | 6 | 0 | 0.530401  | 5.885728  | 0.120900  |
| 63 | 1 | 0 | -0.088070 | 5.518648  | 0.938167  |
| 64 | 1 | 0 | 1.674527  | 7.519149  | -0.577506 |
| 65 | 1 | 0 | 0.855780  | 1.594961  | -0.586024 |
| 66 | 1 | 0 | -0.556195 | 3.206866  | 0.793515  |
| 67 | 6 | 0 | -1.514345 | -0.451385 | -1.294758 |
| 68 | 7 | 0 | -2.173789 | 0.748792  | -0.941672 |
| 69 | 1 | 0 | -3.166040 | 0.682552  | -1.112812 |
| 70 | 6 | 0 | -2.240805 | -1.185104 | -2.374162 |
| 71 | 6 | 0 | -2.551527 | -2.543586 | -2.222421 |
| 72 | 6 | 0 | -2.667487 | -0.525538 | -3.536198 |
| 73 | 6 | 0 | -3.248642 | -3.226601 | -3.215074 |
| 74 | 1 | 0 | -2.260698 | -3.058250 | -1.314512 |
| 75 | 6 | 0 | -3.360882 | -1.210895 | -4.529964 |
| 76 | 1 | 0 | -2.451217 | 0.528781  | -3.667502 |
| 77 | 6 | 0 | -3.651430 | -2.564265 | -4.372830 |
| 78 | 1 | 0 | -3.485845 | -4.275377 | -3.079176 |
| 79 | 1 | 0 | -3.674217 | -0.688673 | -5.426608 |
| 80 | 1 | 0 | -4.194760 | -3.097218 | -5.144224 |
| 81 | 6 | 0 | 0.506076  | -2.013468 | -1.192854 |
| 82 | 6 | 0 | -0.345701 | -0.852121 | -0.759356 |
| 83 | 1 | 0 | 0.063833  | -2.458011 | -2.090532 |
| 84 | 1 | 0 | 0.035011  | -0.313217 | 0.093666  |
| 85 | 6 | 0 | 0.609699  | -3.096174 | -0.133309 |
| 86 | 6 | 0 | 1.424505  | -4.142990 | -0.302255 |
| 87 | 6 | 0 | 2.289903  | -4.158836 | -1.543560 |
| 88 | 6 | 0 | 1.536870  | -5.288625 | 0.661060  |
| 89 | 1 | 0 | 1.285704  | -6.234904 | 0.168686  |

|    |   |   |           |           |           |
|----|---|---|-----------|-----------|-----------|
| 90 | 1 | 0 | 2.564145  | -5.390552 | 1.027110  |
| 91 | 1 | 0 | -0.028230 | -3.015861 | 0.741118  |
| 92 | 1 | 0 | 0.871810  | -5.162970 | 1.517269  |
| 93 | 1 | 0 | 1.694871  | -4.432354 | -2.423437 |
| 94 | 1 | 0 | 3.091343  | -4.894950 | -1.459127 |
| 95 | 1 | 0 | 3.439192  | -2.761582 | -2.736349 |

-----

### 2-6-COM-exo

Energy + zep (gas) = -2109.80482 au

Gibbs free energy (gas) = -2109.89180 au

Gibbs free energy (in solvent) = -2109.14351 au

Zero-point correction = 0.79323 au

Thermal correction to Gibbs free energy = 0.70624 au

Standard orientation:

-----

| Center<br>Number | Atomic<br>Number | Atomic<br>Type | Coordinates (Angstroms) |           |           |
|------------------|------------------|----------------|-------------------------|-----------|-----------|
|                  |                  |                | X                       | Y         | Z         |
| 1                | 6                | 0              | -2.886593               | -0.694551 | -2.033721 |
| 2                | 6                | 0              | -2.834536               | -1.511619 | -3.287260 |
| 3                | 6                | 0              | -3.853281               | -2.370215 | -3.285053 |
| 4                | 6                | 0              | -4.645132               | -2.177268 | -2.025834 |
| 5                | 7                | 0              | -3.986286               | -1.125706 | -1.319179 |
| 6                | 8                | 0              | -2.111296               | 0.189511  | -1.703407 |
| 7                | 8                | 0              | -5.624075               | -2.755409 | -1.653330 |
| 8                | 6                | 0              | -4.409944               | -0.618955 | -0.047245 |
| 9                | 6                | 0              | -5.131380               | 0.573294  | 0.012364  |
| 10               | 6                | 0              | -4.121011               | -1.337810 | 1.111100  |
| 11               | 6                | 0              | -5.555631               | 1.057866  | 1.247867  |
| 12               | 6                | 0              | -5.267844               | 0.346354  | 2.412385  |
| 13               | 6                | 0              | -4.555554               | -0.850055 | 2.342069  |
| 14               | 1                | 0              | -6.132873               | 1.973761  | 1.297879  |
| 15               | 1                | 0              | -5.377835               | 1.097918  | -0.903503 |
| 16               | 1                | 0              | -5.615424               | 0.713973  | 3.370836  |
| 17               | 1                | 0              | -4.346865               | -1.412364 | 3.244459  |
| 18               | 1                | 0              | -3.572667               | -2.269965 | 1.043595  |
| 19               | 1                | 0              | -2.061676               | -1.370190 | -4.028252 |
| 20               | 1                | 0              | -4.130291               | -3.109259 | -4.022297 |
| 21               | 7                | 0              | -0.876011               | 2.054886  | 0.019115  |
| 22               | 6                | 0              | 0.527196                | 2.655164  | -0.114992 |
| 23               | 6                | 0              | -1.254104               | 1.695877  | 1.445332  |
| 24               | 6                | 0              | -1.868308               | 3.072237  | -0.509500 |
| 25               | 6                | 0              | 1.750285                | 1.694472  | -0.120708 |

|    |   |   |           |           |           |
|----|---|---|-----------|-----------|-----------|
| 26 | 6 | 0 | 0.637885  | 3.748475  | 0.970548  |
| 27 | 6 | 0 | -1.334240 | 2.986235  | 2.286471  |
| 28 | 6 | 0 | -1.719387 | 4.413256  | 0.266065  |
| 29 | 6 | 0 | 2.032483  | 0.982008  | -1.449245 |
| 30 | 6 | 0 | -0.763393 | 4.153557  | 1.462713  |
| 31 | 6 | 0 | 1.116108  | 0.912525  | -2.473421 |
| 32 | 6 | 0 | 3.333302  | 0.424089  | -1.688435 |
| 33 | 6 | 0 | 1.444645  | 0.274406  | -3.692910 |
| 34 | 6 | 0 | 3.553464  | -0.204872 | -2.959937 |
| 35 | 7 | 0 | 2.607731  | -0.276735 | -3.935280 |
| 36 | 1 | 0 | -0.504958 | 0.998354  | 1.802501  |
| 37 | 1 | 0 | -2.206584 | 1.171771  | 1.378283  |
| 38 | 1 | 0 | -2.854185 | 2.625972  | -0.389350 |
| 39 | 1 | 0 | -1.675559 | 3.185007  | -1.576108 |
| 40 | 1 | 0 | 2.569810  | 2.418701  | -0.033490 |
| 41 | 1 | 0 | 1.181156  | 4.601245  | 0.559474  |
| 42 | 1 | 0 | 1.217015  | 3.372047  | 1.817660  |
| 43 | 1 | 0 | -2.367462 | 3.193822  | 2.573751  |
| 44 | 1 | 0 | -0.763645 | 2.859733  | 3.208519  |
| 45 | 1 | 0 | -2.697168 | 4.669653  | 0.682433  |
| 46 | 1 | 0 | -0.700947 | 5.054765  | 2.073632  |
| 47 | 1 | 0 | 0.114373  | 1.311489  | -2.386254 |
| 48 | 6 | 0 | 4.407554  | 0.480038  | -0.775610 |
| 49 | 1 | 0 | 0.704388  | 0.228306  | -4.487962 |
| 50 | 6 | 0 | 4.822989  | -0.765182 | -3.238316 |
| 51 | 6 | 0 | 5.849422  | -0.703439 | -2.330345 |
| 52 | 6 | 0 | 5.643796  | -0.062981 | -1.082229 |
| 53 | 1 | 0 | 4.954813  | -1.235969 | -4.204425 |
| 54 | 1 | 0 | 6.809427  | -1.135881 | -2.576334 |
| 55 | 8 | 0 | 6.599039  | 0.062566  | -0.130320 |
| 56 | 1 | 0 | 4.313113  | 0.946371  | 0.194297  |
| 57 | 6 | 0 | 7.905051  | -0.461849 | -0.373586 |
| 58 | 1 | 0 | 8.372958  | 0.019435  | -1.237657 |
| 59 | 1 | 0 | 8.480972  | -0.234133 | 0.520710  |
| 60 | 1 | 0 | 7.878451  | -1.545870 | -0.520314 |
| 61 | 6 | 0 | -1.959371 | 6.693256  | -0.749647 |
| 62 | 1 | 0 | -1.607744 | 7.489008  | -1.395375 |
| 63 | 6 | 0 | -1.289972 | 5.551894  | -0.623687 |
| 64 | 1 | 0 | -0.371261 | 5.416244  | -1.191945 |
| 65 | 1 | 0 | -2.883879 | 6.875850  | -0.210367 |
| 66 | 1 | 0 | -0.999086 | 1.210251  | -0.554433 |
| 67 | 1 | 0 | 0.512824  | 3.126077  | -1.098284 |
| 68 | 6 | 0 | 1.459721  | -0.434463 | 1.321441  |
| 69 | 7 | 0 | 1.873442  | 0.889620  | 1.100676  |

|    |   |   |           |           |           |
|----|---|---|-----------|-----------|-----------|
| 70 | 1 | 0 | 2.694133  | 1.115978  | 1.640875  |
| 71 | 6 | 0 | 1.949736  | -0.957234 | 2.628627  |
| 72 | 6 | 0 | 2.582999  | -2.206229 | 2.703509  |
| 73 | 6 | 0 | 1.830962  | -0.194938 | 3.801273  |
| 74 | 6 | 0 | 3.066150  | -2.683743 | 3.918000  |
| 75 | 1 | 0 | 2.709431  | -2.792813 | 1.802082  |
| 76 | 6 | 0 | 2.310868  | -0.676640 | 5.015777  |
| 77 | 1 | 0 | 1.345776  | 0.774326  | 3.766880  |
| 78 | 6 | 0 | 2.929352  | -1.923363 | 5.077641  |
| 79 | 1 | 0 | 3.557568  | -3.648928 | 3.956530  |
| 80 | 1 | 0 | 2.199391  | -0.080275 | 5.914031  |
| 81 | 1 | 0 | 3.306122  | -2.297705 | 6.022200  |
| 82 | 6 | 0 | 0.053707  | -2.421939 | 0.782103  |
| 83 | 6 | 0 | 0.660404  | -1.145572 | 0.481727  |
| 84 | 1 | 0 | 0.142168  | -2.790514 | 1.799181  |
| 85 | 1 | 0 | 0.438860  | -0.737825 | -0.496873 |
| 86 | 6 | 0 | -0.613070 | -3.176981 | -0.117694 |
| 87 | 6 | 0 | -1.289446 | -4.452477 | 0.157464  |
| 88 | 6 | 0 | -1.811807 | -4.762243 | 1.354618  |
| 89 | 6 | 0 | -1.374139 | -5.411695 | -1.007696 |
| 90 | 1 | 0 | -0.374426 | -5.698672 | -1.349707 |
| 91 | 1 | 0 | -1.920757 | -6.317925 | -0.744616 |
| 92 | 1 | 0 | -0.620692 | -2.850837 | -1.157253 |
| 93 | 1 | 0 | -1.878161 | -4.946030 | -1.862147 |
| 94 | 1 | 0 | -1.782842 | -4.070650 | 2.189297  |
| 95 | 1 | 0 | -2.276863 | -5.724175 | 1.534833  |

-----

### 2-6-TS-exo

Energy + zep (gas) = -2109.77475 au

Gibbs free energy (gas) = -2109.85753 au

Gibbs free energy (in solvent) = -2109.10812 au

Zero-point correction = 0.79340 au

Thermal correction to Gibbs free energy = 0.71062 au

Standard orientation:

-----

| Center<br>Number | Atomic<br>Number | Atomic<br>Type | Coordinates (Angstroms) |           |           |
|------------------|------------------|----------------|-------------------------|-----------|-----------|
|                  |                  |                | X                       | Y         | Z         |
| 1                | 6                | 0              | -2.397956               | -0.826830 | -1.651634 |
| 2                | 6                | 0              | -1.863489               | -1.942564 | -2.357121 |
| 3                | 6                | 0              | -2.720279               | -3.041558 | -2.229893 |
| 4                | 6                | 0              | -3.950061               | -2.539572 | -1.500546 |
| 5                | 7                | 0              | -3.652960               | -1.215424 | -1.111750 |

|    |   |   |           |           |           |
|----|---|---|-----------|-----------|-----------|
| 6  | 8 | 0 | -1.932688 | 0.313994  | -1.499363 |
| 7  | 8 | 0 | -4.971619 | -3.130047 | -1.264978 |
| 8  | 6 | 0 | -4.523522 | -0.376754 | -0.360462 |
| 9  | 6 | 0 | -4.895571 | 0.874095  | -0.861294 |
| 10 | 6 | 0 | -5.022628 | -0.811978 | 0.868616  |
| 11 | 6 | 0 | -5.746006 | 1.691552  | -0.120615 |
| 12 | 6 | 0 | -6.242874 | 1.260203  | 1.108589  |
| 13 | 6 | 0 | -5.885103 | 0.004588  | 1.595065  |
| 14 | 1 | 0 | -6.044687 | 2.654645  | -0.519201 |
| 15 | 1 | 0 | -4.535654 | 1.187499  | -1.832804 |
| 16 | 1 | 0 | -6.919204 | 1.890513  | 1.673940  |
| 17 | 1 | 0 | -6.281600 | -0.344962 | 2.541160  |
| 18 | 1 | 0 | -4.752155 | -1.791719 | 1.240794  |
| 19 | 1 | 0 | -0.955943 | -1.875920 | -2.933871 |
| 20 | 1 | 0 | -2.873971 | -3.778419 | -3.007798 |
| 21 | 7 | 0 | -0.586631 | 2.260648  | -0.358026 |
| 22 | 6 | 0 | 0.866429  | 2.644840  | -0.106135 |
| 23 | 6 | 0 | -1.410212 | 2.097623  | 0.905718  |
| 24 | 6 | 0 | -1.211762 | 3.356250  | -1.195619 |
| 25 | 6 | 0 | 1.900840  | 1.521193  | 0.216298  |
| 26 | 6 | 0 | 0.845172  | 3.777833  | 0.943923  |
| 27 | 6 | 0 | -1.519943 | 3.453642  | 1.629966  |
| 28 | 6 | 0 | -1.056130 | 4.728039  | -0.472594 |
| 29 | 6 | 0 | 2.531317  | 0.865427  | -1.012704 |
| 30 | 6 | 0 | -0.545167 | 4.441602  | 0.967396  |
| 31 | 6 | 0 | 1.932949  | 0.858473  | -2.252233 |
| 32 | 6 | 0 | 3.838895  | 0.287579  | -0.899243 |
| 33 | 6 | 0 | 2.593128  | 0.282218  | -3.363365 |
| 34 | 6 | 0 | 4.417118  | -0.259060 | -2.093402 |
| 35 | 7 | 0 | 3.786032  | -0.258733 | -3.298248 |
| 36 | 1 | 0 | -0.920010 | 1.334551  | 1.498228  |
| 37 | 1 | 0 | -2.368973 | 1.703241  | 0.576847  |
| 38 | 1 | 0 | -2.251811 | 3.069782  | -1.340410 |
| 39 | 1 | 0 | -0.719455 | 3.343494  | -2.168103 |
| 40 | 1 | 0 | 2.720522  | 2.108147  | 0.646174  |
| 41 | 1 | 0 | 1.632737  | 4.494417  | 0.704092  |
| 42 | 1 | 0 | 1.066712  | 3.384973  | 1.941514  |
| 43 | 1 | 0 | -2.542808 | 3.833251  | 1.580093  |
| 44 | 1 | 0 | -1.275712 | 3.333503  | 2.687947  |
| 45 | 1 | 0 | -2.051645 | 5.169497  | -0.377536 |
| 46 | 1 | 0 | -0.507327 | 5.376884  | 1.526952  |
| 47 | 1 | 0 | 0.939399  | 1.257559  | -2.414464 |
| 48 | 6 | 0 | 4.583347  | 0.234931  | 0.297864  |
| 49 | 1 | 0 | 2.103620  | 0.277141  | -4.333553 |

|    |   |   |           |           |           |
|----|---|---|-----------|-----------|-----------|
| 50 | 6 | 0 | 5.713519  | -0.824207 | -2.027695 |
| 51 | 6 | 0 | 6.421603  | -0.858131 | -0.853086 |
| 52 | 6 | 0 | 5.851416  | -0.320572 | 0.329680  |
| 53 | 1 | 0 | 6.126622  | -1.225101 | -2.944803 |
| 54 | 1 | 0 | 7.411250  | -1.293431 | -0.837535 |
| 55 | 8 | 0 | 6.473268  | -0.312085 | 1.531806  |
| 56 | 1 | 0 | 4.191615  | 0.612659  | 1.232432  |
| 57 | 6 | 0 | 7.790673  | -0.853458 | 1.646140  |
| 58 | 1 | 0 | 8.499775  | -0.311754 | 1.013176  |
| 59 | 1 | 0 | 8.068231  | -0.723811 | 2.689838  |
| 60 | 1 | 0 | 7.806608  | -1.918758 | 1.397103  |
| 61 | 6 | 0 | -0.602440 | 6.908563  | -1.624948 |
| 62 | 1 | 0 | 0.050404  | 7.577075  | -2.173337 |
| 63 | 6 | 0 | -0.200226 | 5.700383  | -1.243913 |
| 64 | 1 | 0 | 0.808328  | 5.379550  | -1.499949 |
| 65 | 1 | 0 | -1.600044 | 7.275191  | -1.403071 |
| 66 | 1 | 0 | -0.719339 | 1.370858  | -0.881656 |
| 67 | 1 | 0 | 1.194634  | 3.066898  | -1.055450 |
| 68 | 6 | 0 | 0.931276  | -0.638028 | 1.301492  |
| 69 | 7 | 0 | 1.511205  | 0.619837  | 1.312847  |
| 70 | 1 | 0 | 1.858454  | 0.899978  | 2.217476  |
| 71 | 6 | 0 | 0.470726  | -1.091441 | 2.640583  |
| 72 | 6 | 0 | 0.612380  | -2.439534 | 3.014553  |
| 73 | 6 | 0 | -0.043274 | -0.193720 | 3.593963  |
| 74 | 6 | 0 | 0.220025  | -2.875645 | 4.275361  |
| 75 | 1 | 0 | 1.065863  | -3.138868 | 2.325085  |
| 76 | 6 | 0 | -0.434798 | -0.631829 | 4.853977  |
| 77 | 1 | 0 | -0.154100 | 0.856101  | 3.351891  |
| 78 | 6 | 0 | -0.309472 | -1.976295 | 5.197935  |
| 79 | 1 | 0 | 0.345545  | -3.918007 | 4.543339  |
| 80 | 1 | 0 | -0.840734 | 0.075752  | 5.567366  |
| 81 | 1 | 0 | -0.611181 | -2.317148 | 6.181187  |
| 82 | 6 | 0 | 0.002982  | -2.564063 | 0.025015  |
| 83 | 6 | 0 | 0.852593  | -1.435666 | 0.180272  |
| 84 | 1 | 0 | -0.850815 | -2.631050 | 0.692085  |
| 85 | 1 | 0 | 1.470632  | -1.181775 | -0.666870 |
| 86 | 6 | 0 | 0.218247  | -3.605310 | -0.861979 |
| 87 | 6 | 0 | -0.731245 | -4.595805 | -1.185702 |
| 88 | 6 | 0 | -2.086823 | -4.417700 | -0.869539 |
| 89 | 6 | 0 | -0.336841 | -5.725135 | -2.101037 |
| 90 | 1 | 0 | 0.731220  | -5.717061 | -2.322198 |
| 91 | 1 | 0 | -0.585970 | -6.693037 | -1.656802 |
| 92 | 1 | 0 | 1.173737  | -3.639333 | -1.380020 |
| 93 | 1 | 0 | -0.880669 | -5.666889 | -3.051720 |

|    |   |   |           |           |           |
|----|---|---|-----------|-----------|-----------|
| 94 | 1 | 0 | -2.348733 | -3.822558 | -0.002942 |
| 95 | 1 | 0 | -2.781452 | -5.227836 | -1.063959 |

**2-6-IM-exo**

Energy + zep (gas) = -2109.83741 au

Gibbs free energy (gas) = -2109.91690 au

Gibbs free energy (in solvent) = -2109.18735 au

Zero-point correction = 0.80017 au

Thermal correction to Gibbs free energy = 0.72069 au

Standard orientation:

| Center<br>Number | Atomic<br>Number | Atomic<br>Type | Coordinates (Angstroms) |           |           |
|------------------|------------------|----------------|-------------------------|-----------|-----------|
|                  |                  |                | X                       | Y         | Z         |
| 1                | 6                | 0              | -2.485757               | -0.775871 | -1.074662 |
| 2                | 6                | 0              | -1.507249               | -1.869136 | -1.453542 |
| 3                | 6                | 0              | -2.394369               | -3.098138 | -1.738035 |
| 4                | 6                | 0              | -3.758226               | -2.724692 | -1.175670 |
| 5                | 7                | 0              | -3.736839               | -1.325313 | -0.894763 |
| 6                | 8                | 0              | -2.227776               | 0.413564  | -0.939511 |
| 7                | 8                | 0              | -4.704305               | -3.434855 | -0.988527 |
| 8                | 6                | 0              | -4.896616               | -0.586052 | -0.478818 |
| 9                | 6                | 0              | -5.348764               | 0.478943  | -1.256980 |
| 10               | 6                | 0              | -5.571092               | -0.957292 | 0.682576  |
| 11               | 6                | 0              | -6.480683               | 1.184633  | -0.859463 |
| 12               | 6                | 0              | -7.160886               | 0.821669  | 0.301750  |
| 13               | 6                | 0              | -6.706923               | -0.249651 | 1.067788  |
| 14               | 1                | 0              | -6.839798               | 2.007954  | -1.465725 |
| 15               | 1                | 0              | -4.825417               | 0.743747  | -2.167071 |
| 16               | 1                | 0              | -8.048398               | 1.365598  | 0.602799  |
| 17               | 1                | 0              | -7.240057               | -0.542380 | 1.964405  |
| 18               | 1                | 0              | -5.222503               | -1.799603 | 1.265647  |
| 19               | 1                | 0              | -0.967771               | -1.542621 | -2.345703 |
| 20               | 1                | 0              | -2.533939               | -3.195830 | -2.819664 |
| 21               | 7                | 0              | -0.620564               | 2.369954  | 0.062049  |
| 22               | 6                | 0              | 0.843098                | 2.805050  | 0.133247  |
| 23               | 6                | 0              | -1.250169               | 2.130734  | 1.425180  |
| 24               | 6                | 0              | -1.391231               | 3.465884  | -0.642080 |
| 25               | 6                | 0              | 1.925899                | 1.693814  | 0.271865  |
| 26               | 6                | 0              | 0.917648                | 3.881634  | 1.236542  |
| 27               | 6                | 0              | -1.339627               | 3.465303  | 2.189674  |
| 28               | 6                | 0              | -1.171462               | 4.820027  | 0.098631  |
| 29               | 6                | 0              | 2.501688                | 1.189773  | -1.060901 |



|    |   |   |           |           |           |
|----|---|---|-----------|-----------|-----------|
| 30 | 6 | 0 | -0.476636 | 4.503517  | 1.453527  |
| 31 | 6 | 0 | 1.867966  | 1.364744  | -2.270796 |
| 32 | 6 | 0 | 3.782997  | 0.546431  | -1.075373 |
| 33 | 6 | 0 | 2.453703  | 0.894010  | -3.469559 |
| 34 | 6 | 0 | 4.282570  | 0.107341  | -2.347536 |
| 35 | 7 | 0 | 3.611020  | 0.280802  | -3.517560 |
| 36 | 1 | 0 | -0.624087 | 1.401096  | 1.924343  |
| 37 | 1 | 0 | -2.219490 | 1.680740  | 1.222560  |
| 38 | 1 | 0 | -2.433930 | 3.152434  | -0.648972 |
| 39 | 1 | 0 | -1.041070 | 3.500044  | -1.673858 |
| 40 | 1 | 0 | 2.753995  | 2.251065  | 0.722836  |
| 41 | 1 | 0 | 1.655506  | 4.631336  | 0.944898  |
| 42 | 1 | 0 | 1.263452  | 3.438042  | 2.175144  |
| 43 | 1 | 0 | -2.375002 | 3.807497  | 2.255732  |
| 44 | 1 | 0 | -0.981367 | 3.327689  | 3.212013  |
| 45 | 1 | 0 | -2.156226 | 5.233139  | 0.332095  |
| 46 | 1 | 0 | -0.396060 | 5.420578  | 2.037928  |
| 47 | 1 | 0 | 0.899115  | 1.845512  | -2.345638 |
| 48 | 6 | 0 | 4.584344  | 0.339979  | 0.067934  |
| 49 | 1 | 0 | 1.933135  | 1.035525  | -4.413269 |
| 50 | 6 | 0 | 5.546044  | -0.528763 | -2.405026 |
| 51 | 6 | 0 | 6.303838  | -0.721944 | -1.277885 |
| 52 | 6 | 0 | 5.821205  | -0.275377 | -0.021138 |
| 53 | 1 | 0 | 5.894743  | -0.849770 | -3.378568 |
| 54 | 1 | 0 | 7.267313  | -1.206462 | -1.357130 |
| 55 | 8 | 0 | 6.502334  | -0.410607 | 1.141631  |
| 56 | 1 | 0 | 4.271662  | 0.654694  | 1.053703  |
| 57 | 6 | 0 | 7.791330  | -1.025939 | 1.132075  |
| 58 | 1 | 0 | 8.496870  | -0.463240 | 0.513458  |
| 59 | 1 | 0 | 8.128254  | -1.010921 | 2.166253  |
| 60 | 1 | 0 | 7.735648  | -2.062092 | 0.784864  |
| 61 | 6 | 0 | -0.922126 | 7.040751  | -1.037320 |
| 62 | 1 | 0 | -0.359171 | 7.744199  | -1.639097 |
| 63 | 6 | 0 | -0.442205 | 5.836748  | -0.742423 |
| 64 | 1 | 0 | 0.538017  | 5.555934  | -1.123861 |
| 65 | 1 | 0 | -1.895869 | 7.369141  | -0.686797 |
| 66 | 1 | 0 | -0.768513 | 1.494343  | -0.466477 |
| 67 | 1 | 0 | 1.019280  | 3.289709  | -0.825352 |
| 68 | 6 | 0 | 0.930790  | -0.551684 | 1.097945  |
| 69 | 7 | 0 | 1.601003  | 0.681678  | 1.285119  |
| 70 | 1 | 0 | 2.297112  | 0.617808  | 2.012571  |
| 71 | 6 | 0 | 0.790849  | -1.297613 | 2.386102  |
| 72 | 6 | 0 | 0.994005  | -2.684299 | 2.444198  |
| 73 | 6 | 0 | 0.499645  | -0.623774 | 3.584255  |

|    |   |   |           |           |           |
|----|---|---|-----------|-----------|-----------|
| 74 | 6 | 0 | 0.883015  | -3.373275 | 3.648523  |
| 75 | 1 | 0 | 1.262462  | -3.225804 | 1.547330  |
| 76 | 6 | 0 | 0.385533  | -1.313546 | 4.787360  |
| 77 | 1 | 0 | 0.360480  | 0.450413  | 3.579889  |
| 78 | 6 | 0 | 0.573655  | -2.693003 | 4.823699  |
| 79 | 1 | 0 | 1.051077  | -4.443809 | 3.668943  |
| 80 | 1 | 0 | 0.151156  | -0.772825 | 5.697089  |
| 81 | 1 | 0 | 0.489568  | -3.230906 | 5.760621  |
| 82 | 6 | 0 | -0.437425 | -2.168029 | -0.349641 |
| 83 | 6 | 0 | 0.437014  | -0.968619 | -0.086959 |
| 84 | 1 | 0 | -0.976247 | -2.430525 | 0.570549  |
| 85 | 1 | 0 | 0.694651  | -0.405222 | -0.972216 |
| 86 | 6 | 0 | 0.319304  | -3.399417 | -0.830808 |
| 87 | 6 | 0 | -0.344911 | -4.486418 | -1.234635 |
| 88 | 6 | 0 | -1.858287 | -4.442590 | -1.191675 |
| 89 | 6 | 0 | 0.316658  | -5.750176 | -1.702544 |
| 90 | 1 | 0 | 1.404726  | -5.673004 | -1.668317 |
| 91 | 1 | 0 | 0.013743  | -6.601674 | -1.082975 |
| 92 | 1 | 0 | 1.403551  | -3.360152 | -0.843697 |
| 93 | 1 | 0 | 0.020391  | -5.990018 | -2.729753 |
| 94 | 1 | 0 | -2.195982 | -4.573479 | -0.156038 |
| 95 | 1 | 0 | -2.298324 | -5.266680 | -1.754581 |

-----

### 2-7-COM-endo

Energy + zep (gas) = -2109.81547 au

Gibbs free energy (gas) = -2109.90504 au

Gibbs free energy (in solvent) = -2109.15224 au

Zero-point correction = 0.79325 au

Thermal correction to Gibbs free energy = 0.70368 au

Standard orientation:

-----

| Center<br>Number | Atomic<br>Number | Atomic<br>Type | Coordinates (Angstroms) |          |           |
|------------------|------------------|----------------|-------------------------|----------|-----------|
|                  |                  |                | X                       | Y        | Z         |
| 1                | 7                | 0              | -1.353577               | 1.698658 | -0.141241 |
| 2                | 6                | 0              | 0.060986                | 2.153411 | -0.477619 |
| 3                | 6                | 0              | -1.823548               | 2.165747 | 1.216113  |
| 4                | 6                | 0              | -2.300517               | 2.203321 | -1.200925 |
| 5                | 6                | 0              | 1.069196                | 1.350281 | 0.364144  |
| 6                | 6                | 0              | 0.112945                | 3.688284 | -0.292909 |
| 7                | 6                | 0              | -1.863947               | 3.709452 | 1.235237  |
| 8                | 6                | 0              | -2.261200               | 3.760605 | -1.238145 |
| 9                | 6                | 0              | 2.522542                | 1.713969 | 0.093937  |

|    |   |   |           |           |           |
|----|---|---|-----------|-----------|-----------|
| 10 | 6 | 0 | -1.314369 | 4.237830  | -0.101692 |
| 11 | 6 | 0 | 2.961123  | 2.166796  | -1.128481 |
| 12 | 6 | 0 | 3.497369  | 1.540568  | 1.131255  |
| 13 | 6 | 0 | 4.332390  | 2.449950  | -1.336630 |
| 14 | 6 | 0 | 4.858097  | 1.857519  | 0.809090  |
| 15 | 7 | 0 | 5.252197  | 2.304747  | -0.413868 |
| 16 | 1 | 0 | -1.144982 | 1.750279  | 1.958384  |
| 17 | 1 | 0 | -2.797892 | 1.704208  | 1.367088  |
| 18 | 1 | 0 | -3.285106 | 1.808725  | -0.954418 |
| 19 | 1 | 0 | -1.980815 | 1.761430  | -2.144334 |
| 20 | 1 | 0 | 0.872301  | 1.612935  | 1.406190  |
| 21 | 1 | 0 | 0.600615  | 4.147861  | -1.152305 |
| 22 | 1 | 0 | 0.720325  | 3.944860  | 0.579513  |
| 23 | 1 | 0 | -2.886689 | 4.059061  | 1.390715  |
| 24 | 1 | 0 | -1.265326 | 4.090918  | 2.064855  |
| 25 | 1 | 0 | -3.261147 | 4.134612  | -1.002052 |
| 26 | 1 | 0 | -1.292013 | 5.328233  | -0.091290 |
| 27 | 1 | 0 | 2.280809  | 2.304423  | -1.959524 |
| 28 | 6 | 0 | 3.204207  | 1.083489  | 2.434686  |
| 29 | 1 | 0 | 4.664940  | 2.808406  | -2.307363 |
| 30 | 6 | 0 | 5.851251  | 1.704930  | 1.806252  |
| 31 | 6 | 0 | 5.541132  | 1.260195  | 3.067009  |
| 32 | 6 | 0 | 4.196954  | 0.944128  | 3.389367  |
| 33 | 1 | 0 | 6.868915  | 1.954931  | 1.533549  |
| 34 | 1 | 0 | 6.323909  | 1.156021  | 3.805699  |
| 35 | 8 | 0 | 3.793916  | 0.499126  | 4.605176  |
| 36 | 1 | 0 | 2.198137  | 0.831209  | 2.744750  |
| 37 | 6 | 0 | 4.758207  | 0.338327  | 5.646526  |
| 38 | 1 | 0 | 5.239049  | 1.289198  | 5.894901  |
| 39 | 1 | 0 | 4.198748  | -0.017669 | 6.508954  |
| 40 | 1 | 0 | 5.516802  | -0.402638 | 5.376807  |
| 41 | 6 | 0 | -2.626741 | 5.133358  | -3.305168 |
| 42 | 1 | 0 | -2.311532 | 5.487539  | -4.279383 |
| 43 | 6 | 0 | -1.887107 | 4.282350  | -2.601345 |
| 44 | 1 | 0 | -0.948045 | 3.926331  | -3.022091 |
| 45 | 1 | 0 | -3.574858 | 5.509764  | -2.933249 |
| 46 | 1 | 0 | 0.175026  | 1.881340  | -1.526671 |
| 47 | 1 | 0 | -1.367369 | 0.666624  | -0.132349 |
| 48 | 7 | 0 | 0.767803  | -0.111451 | 0.280912  |
| 49 | 1 | 0 | 0.922208  | -0.524809 | 1.192502  |
| 50 | 6 | 0 | 1.399589  | -0.934958 | -0.707722 |
| 51 | 6 | 0 | 0.996087  | -0.719150 | -2.124107 |
| 52 | 6 | 0 | 1.960673  | -0.532402 | -3.124878 |
| 53 | 6 | 0 | -0.357105 | -0.738164 | -2.498650 |

|    |   |   |           |           |           |
|----|---|---|-----------|-----------|-----------|
| 54 | 6 | 0 | 1.584915  | -0.363950 | -4.455888 |
| 55 | 6 | 0 | -0.731338 | -0.575804 | -3.830573 |
| 56 | 6 | 0 | 0.238699  | -0.382899 | -4.813769 |
| 57 | 6 | 0 | 2.768178  | -2.993853 | -1.129546 |
| 58 | 6 | 0 | 2.233783  | -1.928082 | -0.313605 |
| 59 | 6 | 0 | 3.621424  | -3.927763 | -0.660494 |
| 60 | 6 | 0 | 4.183098  | -5.051953 | -1.422177 |
| 61 | 6 | 0 | 3.528909  | -5.637134 | -2.435348 |
| 62 | 6 | 0 | 5.542872  | -5.532981 | -0.971602 |
| 63 | 1 | 0 | 3.008899  | -0.514547 | -2.852420 |
| 64 | 1 | 0 | -1.116024 | -0.919378 | -1.746122 |
| 65 | 1 | 0 | 2.346277  | -0.221248 | -5.214093 |
| 66 | 1 | 0 | -1.779421 | -0.620598 | -4.105990 |
| 67 | 1 | 0 | -0.052211 | -0.260319 | -5.850448 |
| 68 | 1 | 0 | 2.466990  | -3.033598 | -2.171292 |
| 69 | 1 | 0 | 2.507153  | -1.957557 | 0.740229  |
| 70 | 1 | 0 | 3.964813  | -3.837765 | 0.369684  |
| 71 | 1 | 0 | 2.530593  | -5.331552 | -2.726499 |
| 72 | 1 | 0 | 3.970575  | -6.455511 | -2.991712 |
| 73 | 1 | 0 | 6.287536  | -4.733768 | -1.045774 |
| 74 | 1 | 0 | 5.886164  | -6.378209 | -1.569215 |
| 75 | 1 | 0 | 5.515506  | -5.847015 | 0.077712  |
| 76 | 6 | 0 | -3.113224 | -1.823609 | 0.498368  |
| 77 | 6 | 0 | -2.216801 | -3.023670 | 0.510242  |
| 78 | 6 | 0 | -2.902925 | -4.067301 | 0.973194  |
| 79 | 6 | 0 | -4.297866 | -3.622971 | 1.299052  |
| 80 | 7 | 0 | -4.345981 | -2.234575 | 0.970705  |
| 81 | 8 | 0 | -2.823386 | -0.690381 | 0.146801  |
| 82 | 8 | 0 | -5.203709 | -4.264693 | 1.747197  |
| 83 | 6 | 0 | -5.508863 | -1.408902 | 1.105729  |
| 84 | 6 | 0 | -6.110390 | -1.265069 | 2.354808  |
| 85 | 6 | 0 | -6.042439 | -0.777412 | -0.017605 |
| 86 | 6 | 0 | -7.254343 | -0.480923 | 2.477140  |
| 87 | 6 | 0 | -7.786594 | 0.163206  | 1.362394  |
| 88 | 6 | 0 | -7.178520 | 0.015572  | 0.116931  |
| 89 | 1 | 0 | -1.188496 | -2.973125 | 0.182367  |
| 90 | 1 | 0 | -2.584465 | -5.088785 | 1.120123  |
| 91 | 1 | 0 | -5.696966 | -1.773898 | 3.216279  |
| 92 | 1 | 0 | -5.581325 | -0.920233 | -0.987129 |
| 93 | 1 | 0 | -7.731020 | -0.377939 | 3.444582  |
| 94 | 1 | 0 | -8.679081 | 0.769567  | 1.461518  |
| 95 | 1 | 0 | -7.599908 | 0.501591  | -0.755196 |

## 2-7-TS-endo

Energy + zep (gas) = -2109.78640 au

Gibbs free energy (gas) = -2109.86763 au

Gibbs free energy (in solvent) = -2109.12382 au

Zero-point correction = 0.79384 au

Thermal correction to Gibbs free energy = 0.71261 au

Standard orientation:

| Center<br>Number | Atomic<br>Number | Atomic<br>Type | Coordinates (Angstroms) |           |           |
|------------------|------------------|----------------|-------------------------|-----------|-----------|
|                  |                  |                | X                       | Y         | Z         |
| 1                | 7                | 0              | 0.053569                | 2.118750  | 0.021984  |
| 2                | 6                | 0              | 1.448339                | 1.778941  | -0.489724 |
| 3                | 6                | 0              | 0.043854                | 2.566023  | 1.462408  |
| 4                | 6                | 0              | -0.529566               | 3.217084  | -0.845196 |
| 5                | 6                | 0              | 2.094931                | 0.593505  | 0.274937  |
| 6                | 6                | 0              | 2.301323                | 3.075512  | -0.411747 |
| 7                | 6                | 0              | 1.018656                | 3.753204  | 1.629415  |
| 8                | 6                | 0              | 0.234900                | 4.546620  | -0.614052 |
| 9                | 6                | 0              | 3.406026                | 0.132162  | -0.369008 |
| 10               | 6                | 0              | 1.489278                | 4.212611  | 0.236842  |
| 11               | 6                | 0              | 3.707767                | 0.337148  | -1.693986 |
| 12               | 6                | 0              | 4.378149                | -0.540105 | 0.443508  |
| 13               | 6                | 0              | 4.941334                | -0.111279 | -2.223795 |
| 14               | 6                | 0              | 5.594166                | -0.948404 | -0.198138 |
| 15               | 7                | 0              | 5.854357                | -0.729685 | -1.515546 |
| 16               | 1                | 0              | 0.305655                | 1.709212  | 2.079825  |
| 17               | 1                | 0              | -0.990104               | 2.825251  | 1.687857  |
| 18               | 1                | 0              | -1.587681               | 3.275958  | -0.597886 |
| 19               | 1                | 0              | -0.448041               | 2.871474  | -1.876006 |
| 20               | 1                | 0              | 2.374351                | 0.985421  | 1.256555  |
| 21               | 1                | 0              | 2.642640                | 3.361432  | -1.407187 |
| 22               | 1                | 0              | 3.202318                | 2.888924  | 0.176992  |
| 23               | 1                | 0              | 0.520136                | 4.569921  | 2.154543  |
| 24               | 1                | 0              | 1.879148                | 3.461557  | 2.236230  |
| 25               | 1                | 0              | -0.395722               | 5.215234  | -0.020762 |
| 26               | 1                | 0              | 2.113482                | 5.102288  | 0.328560  |
| 27               | 1                | 0              | 3.015461                | 0.819267  | -2.371947 |
| 28               | 6                | 0              | 4.217014                | -0.817849 | 1.817465  |
| 29               | 1                | 0              | 5.163747                | 0.053872  | -3.274565 |
| 30               | 6                | 0              | 6.584801                | -1.607940 | 0.568399  |
| 31               | 6                | 0              | 6.406305                | -1.863543 | 1.904746  |
| 32               | 6                | 0              | 5.204934                | -1.462273 | 2.542411  |
| 33               | 1                | 0              | 7.492803                | -1.901517 | 0.056716  |

|    |   |   |           |           |           |
|----|---|---|-----------|-----------|-----------|
| 34 | 1 | 0 | 7.183461  | -2.368306 | 2.461915  |
| 35 | 8 | 0 | 4.938005  | -1.671095 | 3.854362  |
| 36 | 1 | 0 | 3.318782  | -0.549320 | 2.357255  |
| 37 | 6 | 0 | 5.907164  | -2.332519 | 4.669540  |
| 38 | 1 | 0 | 6.842461  | -1.766611 | 4.714589  |
| 39 | 1 | 0 | 5.467508  | -2.380476 | 5.663385  |
| 40 | 1 | 0 | 6.102943  | -3.347510 | 4.311103  |
| 41 | 6 | 0 | 0.126795  | 6.466022  | -2.224556 |
| 42 | 1 | 0 | 0.379582  | 6.926642  | -3.172021 |
| 43 | 6 | 0 | 0.540179  | 5.241401  | -1.914862 |
| 44 | 1 | 0 | 1.138533  | 4.686246  | -2.635634 |
| 45 | 1 | 0 | -0.478821 | 7.054839  | -1.542495 |
| 46 | 1 | 0 | 1.274616  | 1.484984  | -1.522297 |
| 47 | 1 | 0 | -0.602344 | 1.319039  | -0.082576 |
| 48 | 7 | 0 | 1.170219  | -0.498705 | 0.594699  |
| 49 | 1 | 0 | 0.957563  | -0.589742 | 1.576751  |
| 50 | 6 | 0 | 0.383377  | -1.290763 | -0.220849 |
| 51 | 6 | 0 | 0.728117  | -1.415218 | -1.670861 |
| 52 | 6 | 0 | 1.639033  | -2.402300 | -2.064383 |
| 53 | 6 | 0 | 0.139492  | -0.603720 | -2.646640 |
| 54 | 6 | 0 | 1.963470  | -2.564770 | -3.408266 |
| 55 | 6 | 0 | 0.470361  | -0.764439 | -3.991977 |
| 56 | 6 | 0 | 1.384361  | -1.743778 | -4.374315 |
| 57 | 6 | 0 | -1.687415 | -2.676036 | -0.329435 |
| 58 | 6 | 0 | -0.656483 | -1.975310 | 0.349451  |
| 59 | 6 | 0 | -2.770938 | -3.191944 | 0.358531  |
| 60 | 6 | 0 | -4.005683 | -3.610616 | -0.182439 |
| 61 | 6 | 0 | -4.310203 | -3.477038 | -1.542236 |
| 62 | 6 | 0 | -5.096136 | -4.062749 | 0.756770  |
| 63 | 1 | 0 | 2.091733  | -3.041678 | -1.315869 |
| 64 | 1 | 0 | -0.597507 | 0.133539  | -2.352079 |
| 65 | 1 | 0 | 2.668489  | -3.334090 | -3.700054 |
| 66 | 1 | 0 | 0.004083  | -0.134167 | -4.740893 |
| 67 | 1 | 0 | 1.636442  | -1.873737 | -5.420203 |
| 68 | 1 | 0 | -1.615797 | -2.785536 | -1.404586 |
| 69 | 1 | 0 | -0.789132 | -1.861856 | 1.424493  |
| 70 | 1 | 0 | -2.712657 | -3.169620 | 1.444026  |
| 71 | 1 | 0 | -3.519496 | -3.500484 | -2.280362 |
| 72 | 1 | 0 | -5.261946 | -3.866162 | -1.887249 |
| 73 | 1 | 0 | -4.781206 | -4.013061 | 1.799791  |
| 74 | 1 | 0 | -5.384880 | -5.095167 | 0.536913  |
| 75 | 1 | 0 | -5.990852 | -3.443908 | 0.636295  |
| 76 | 6 | 0 | -3.197150 | 0.007549  | -0.719249 |
| 77 | 6 | 0 | -3.380215 | -0.754616 | -1.917610 |

|    |   |   |           |           |           |
|----|---|---|-----------|-----------|-----------|
| 78 | 6 | 0 | -4.601616 | -1.415166 | -1.874271 |
| 79 | 6 | 0 | -5.305477 | -0.948267 | -0.625761 |
| 80 | 7 | 0 | -4.368262 | -0.157481 | 0.069081  |
| 81 | 8 | 0 | -2.253615 | 0.739997  | -0.383336 |
| 82 | 8 | 0 | -6.432975 | -1.188278 | -0.269422 |
| 83 | 6 | 0 | -4.603376 | 0.461226  | 1.330745  |
| 84 | 6 | 0 | -3.636513 | 0.382222  | 2.336635  |
| 85 | 6 | 0 | -5.803570 | 1.134593  | 1.568873  |
| 86 | 6 | 0 | -3.864963 | 0.988666  | 3.568728  |
| 87 | 6 | 0 | -5.061393 | 1.661670  | 3.809568  |
| 88 | 6 | 0 | -6.028479 | 1.725653  | 2.809161  |
| 89 | 1 | 0 | -2.680328 | -0.738924 | -2.736129 |
| 90 | 1 | 0 | -5.205169 | -1.658983 | -2.737486 |
| 91 | 1 | 0 | -2.720427 | -0.161991 | 2.149899  |
| 92 | 1 | 0 | -6.558608 | 1.177562  | 0.796351  |
| 93 | 1 | 0 | -3.116559 | 0.917247  | 4.350283  |
| 94 | 1 | 0 | -5.243364 | 2.122286  | 4.773373  |
| 95 | 1 | 0 | -6.965510 | 2.238470  | 2.991551  |

### 2-7-IM-endo

Energy + zep (gas) = -2109.84213 au

Gibbs free energy (gas) = -2109.92296 au

Gibbs free energy (in solvent) = -2109.19572 au

Zero-point correction = 0.79970 au

Thermal correction to Gibbs free energy = 0.71887 au

Standard orientation:

| Center<br>Number | Atomic<br>Number | Atomic<br>Type | Coordinates (Angstroms) |           |           |
|------------------|------------------|----------------|-------------------------|-----------|-----------|
|                  |                  |                | X                       | Y         | Z         |
| 1                | 7                | 0              | -0.003872               | 1.901664  | -0.197500 |
| 2                | 6                | 0              | 1.410288                | 1.610221  | -0.699048 |
| 3                | 6                | 0              | -0.024592               | 2.569906  | 1.155995  |
| 4                | 6                | 0              | -0.709500               | 2.789166  | -1.205814 |
| 5                | 6                | 0              | 2.188023                | 0.632416  | 0.217930  |
| 6                | 6                | 0              | 2.126362                | 2.980045  | -0.866901 |
| 7                | 6                | 0              | 0.839193                | 3.848155  | 1.096660  |
| 8                | 6                | 0              | -0.075872               | 4.204416  | -1.209348 |
| 9                | 6                | 0              | 3.559517                | 0.287359  | -0.372405 |
| 10               | 6                | 0              | 1.225426                | 4.124301  | -0.368802 |
| 11               | 6                | 0              | 3.828038                | 0.310419  | -1.720191 |
| 12               | 6                | 0              | 4.623821                | -0.084852 | 0.513724  |
| 13               | 6                | 0              | 5.117875                | -0.020490 | -2.199805 |

|    |   |   |           |           |           |
|----|---|---|-----------|-----------|-----------|
| 14 | 6 | 0 | 5.892996  | -0.389544 | -0.080646 |
| 15 | 7 | 0 | 6.118871  | -0.353784 | -1.422346 |
| 16 | 1 | 0 | 0.332800  | 1.848430  | 1.888324  |
| 17 | 1 | 0 | -1.073882 | 2.767935  | 1.371638  |
| 18 | 1 | 0 | -1.762378 | 2.788961  | -0.933764 |
| 19 | 1 | 0 | -0.608364 | 2.294033  | -2.172633 |
| 20 | 1 | 0 | 2.397361  | 1.177891  | 1.142050  |
| 21 | 1 | 0 | 2.408566  | 3.133433  | -1.908941 |
| 22 | 1 | 0 | 3.057993  | 2.976635  | -0.297559 |
| 23 | 1 | 0 | 0.281623  | 4.689722  | 1.511784  |
| 24 | 1 | 0 | 1.740188  | 3.730800  | 1.703087  |
| 25 | 1 | 0 | -0.756287 | 4.894089  | -0.701219 |
| 26 | 1 | 0 | 1.762401  | 5.070968  | -0.440261 |
| 27 | 1 | 0 | 3.068146  | 0.557363  | -2.450932 |
| 28 | 6 | 0 | 4.500645  | -0.168767 | 1.917151  |
| 29 | 1 | 0 | 5.311903  | -0.003471 | -3.269029 |
| 30 | 6 | 0 | 6.974618  | -0.745777 | 0.759865  |
| 31 | 6 | 0 | 6.832717  | -0.810929 | 2.123381  |
| 32 | 6 | 0 | 5.576849  | -0.519688 | 2.713576  |
| 33 | 1 | 0 | 7.921322  | -0.965664 | 0.282434  |
| 34 | 1 | 0 | 7.679387  | -1.086187 | 2.737008  |
| 35 | 8 | 0 | 5.339255  | -0.564319 | 4.048260  |
| 36 | 1 | 0 | 3.562878  | 0.017244  | 2.422749  |
| 37 | 6 | 0 | 6.395658  | -0.934216 | 4.934625  |
| 38 | 1 | 0 | 7.229468  | -0.227722 | 4.879095  |
| 39 | 1 | 0 | 5.963491  | -0.901907 | 5.932531  |
| 40 | 1 | 0 | 6.753222  | -1.947649 | 4.728468  |
| 41 | 6 | 0 | -0.419999 | 5.825419  | -3.091976 |
| 42 | 1 | 0 | -0.235863 | 6.154896  | -4.107539 |
| 43 | 6 | 0 | 0.127199  | 4.713199  | -2.612295 |
| 44 | 1 | 0 | 0.767069  | 4.115757  | -3.259893 |
| 45 | 1 | 0 | -1.070120 | 6.450237  | -2.487269 |
| 46 | 1 | 0 | 1.240513  | 1.133591  | -1.664113 |
| 47 | 1 | 0 | -0.566084 | 1.036706  | -0.140835 |
| 48 | 7 | 0 | 1.440346  | -0.561842 | 0.652830  |
| 49 | 1 | 0 | 1.111103  | -0.484890 | 1.604622  |
| 50 | 6 | 0 | 0.520899  | -1.258847 | -0.169892 |
| 51 | 6 | 0 | 1.059868  | -1.837273 | -1.433242 |
| 52 | 6 | 0 | 2.186625  | -2.669397 | -1.381876 |
| 53 | 6 | 0 | 0.452872  | -1.601798 | -2.673027 |
| 54 | 6 | 0 | 2.678812  | -3.263476 | -2.538297 |
| 55 | 6 | 0 | 0.954475  | -2.187271 | -3.834792 |
| 56 | 6 | 0 | 2.066393  | -3.022624 | -3.768329 |
| 57 | 6 | 0 | -1.825800 | -2.312490 | -0.298136 |



|    |   |   |           |           |           |
|----|---|---|-----------|-----------|-----------|
| 58 | 6 | 0 | -0.734177 | -1.455479 | 0.281535  |
| 59 | 6 | 0 | -2.420247 | -3.238626 | 0.747178  |
| 60 | 6 | 0 | -3.546243 | -3.922836 | 0.523246  |
| 61 | 6 | 0 | -4.261968 | -3.707608 | -0.791540 |
| 62 | 6 | 0 | -4.138324 | -4.900151 | 1.496513  |
| 63 | 1 | 0 | 2.667690  | -2.849366 | -0.428327 |
| 64 | 1 | 0 | -0.412318 | -0.950202 | -2.733462 |
| 65 | 1 | 0 | 3.543971  | -3.913552 | -2.481471 |
| 66 | 1 | 0 | 0.476267  | -1.992757 | -4.787978 |
| 67 | 1 | 0 | 2.454880  | -3.483577 | -4.668861 |
| 68 | 1 | 0 | -1.400174 | -2.923431 | -1.102171 |
| 69 | 1 | 0 | -0.988627 | -0.987722 | 1.231270  |
| 70 | 1 | 0 | -1.866738 | -3.373297 | 1.671605  |
| 71 | 1 | 0 | -3.762974 | -4.269858 | -1.590099 |
| 72 | 1 | 0 | -5.290727 | -4.070191 | -0.744892 |
| 73 | 1 | 0 | -3.529620 | -4.994070 | 2.397463  |
| 74 | 1 | 0 | -4.229917 | -5.892469 | 1.040985  |
| 75 | 1 | 0 | -5.148883 | -4.593837 | 1.787486  |
| 76 | 6 | 0 | -3.325052 | -0.205117 | -0.205488 |
| 77 | 6 | 0 | -2.956139 | -1.457235 | -0.991819 |
| 78 | 6 | 0 | -4.289430 | -2.213965 | -1.164503 |
| 79 | 6 | 0 | -5.281262 | -1.460628 | -0.281920 |
| 80 | 7 | 0 | -4.641607 | -0.283635 | 0.191032  |
| 81 | 8 | 0 | -2.584778 | 0.738869  | 0.037892  |
| 82 | 8 | 0 | -6.411279 | -1.765742 | -0.025263 |
| 83 | 6 | 0 | -5.308503 | 0.704807  | 0.992514  |
| 84 | 6 | 0 | -4.842733 | 0.982343  | 2.276171  |
| 85 | 6 | 0 | -6.429298 | 1.357228  | 0.484345  |
| 86 | 6 | 0 | -5.499900 | 1.933005  | 3.051673  |
| 87 | 6 | 0 | -6.620177 | 2.593114  | 2.550090  |
| 88 | 6 | 0 | -7.084769 | 2.301473  | 1.269466  |
| 89 | 1 | 0 | -2.563535 | -1.117329 | -1.952732 |
| 90 | 1 | 0 | -4.657262 | -2.107711 | -2.190153 |
| 91 | 1 | 0 | -3.986023 | 0.447453  | 2.666708  |
| 92 | 1 | 0 | -6.791967 | 1.118569  | -0.507377 |
| 93 | 1 | 0 | -5.145789 | 2.147039  | 4.053242  |
| 94 | 1 | 0 | -7.135747 | 3.325606  | 3.159780  |
| 95 | 1 | 0 | -7.961824 | 2.804765  | 0.880672  |

---

### 2-8-COM-exo

Energy + zep (gas) = -2109.81450 au

Gibbs free energy (gas) = -2109.90414 au

Gibbs free energy (in solvent) = -2109.15176 au

Zero-point correction = 0.79304 au

Thermal correction to Gibbs free energy = 0.70341 au

Standard orientation:

| Center<br>Number | Atomic<br>Number | Atomic<br>Type | Coordinates (Angstroms) |           |           |
|------------------|------------------|----------------|-------------------------|-----------|-----------|
|                  |                  |                | X                       | Y         | Z         |
| 1                | 6                | 0              | 3.227558                | 0.841712  | 2.360219  |
| 2                | 6                | 0              | 2.786247                | 1.583303  | 3.584379  |
| 3                | 6                | 0              | 3.668736                | 2.544645  | 3.850068  |
| 4                | 6                | 0              | 4.754696                | 2.501340  | 2.816625  |
| 5                | 7                | 0              | 4.414224                | 1.423493  | 1.946124  |
| 6                | 8                | 0              | 2.655267                | -0.089743 | 1.819004  |
| 7                | 8                | 0              | 5.715216                | 3.207772  | 2.708046  |
| 8                | 6                | 0              | 5.199877                | 1.017550  | 0.819933  |
| 9                | 6                | 0              | 5.755424                | -0.261364 | 0.788472  |
| 10               | 6                | 0              | 5.425261                | 1.915054  | -0.222383 |
| 11               | 6                | 0              | 6.527549                | -0.648103 | -0.303560 |
| 12               | 6                | 0              | 6.757256                | 0.243950  | -1.349781 |
| 13               | 6                | 0              | 6.211054                | 1.525119  | -1.304214 |
| 14               | 1                | 0              | 1.878836                | 1.325654  | 4.110281  |
| 15               | 1                | 0              | 3.674194                | 3.272925  | 4.647534  |
| 16               | 1                | 0              | 5.600198                | -0.936252 | 1.621564  |
| 17               | 1                | 0              | 5.003177                | 2.911083  | -0.178949 |
| 18               | 1                | 0              | 6.967837                | -1.638050 | -0.326746 |
| 19               | 1                | 0              | 7.372007                | -0.053811 | -2.190909 |
| 20               | 1                | 0              | 6.400518                | 2.226751  | -2.107819 |
| 21               | 7                | 0              | 0.987073                | -2.018258 | 0.500422  |
| 22               | 6                | 0              | -0.275326               | -2.162077 | -0.340744 |
| 23               | 6                | 0              | 0.916772                | -2.770591 | 1.807734  |
| 24               | 6                | 0              | 2.171528                | -2.501464 | -0.298787 |
| 25               | 6                | 0              | -1.402532               | -1.322608 | 0.287360  |
| 26               | 6                | 0              | -0.566088               | -3.673284 | -0.487710 |
| 27               | 6                | 0              | 0.795848                | -4.282082 | 1.515652  |
| 28               | 6                | 0              | 1.961736                | -3.995976 | -0.685453 |
| 29               | 6                | 0              | -2.710994               | -1.384544 | -0.488709 |
| 30               | 6                | 0              | 0.652427                | -4.483599 | -0.003314 |
| 31               | 6                | 0              | -2.757756               | -1.565729 | -1.851549 |
| 32               | 6                | 0              | -3.953614               | -1.206807 | 0.204285  |
| 33               | 6                | 0              | -4.000030               | -1.581989 | -2.529474 |
| 34               | 6                | 0              | -5.151691               | -1.242690 | -0.582961 |
| 35               | 7                | 0              | -5.156101               | -1.429446 | -1.930637 |
| 36               | 1                | 0              | 0.069152                | -2.377833 | 2.365785  |
| 37               | 1                | 0              | 1.819698                | -2.502901 | 2.352863  |

|    |   |   |           |           |           |
|----|---|---|-----------|-----------|-----------|
| 38 | 1 | 0 | 3.053615  | -2.338562 | 0.317608  |
| 39 | 1 | 0 | 2.245717  | -1.853054 | -1.171110 |
| 40 | 1 | 0 | -1.601124 | -1.761991 | 1.267767  |
| 41 | 1 | 0 | -0.805575 | -3.903618 | -1.525346 |
| 42 | 1 | 0 | -1.444912 | -3.950689 | 0.101278  |
| 43 | 1 | 0 | 1.674888  | -4.812399 | 1.888045  |
| 44 | 1 | 0 | -0.071886 | -4.695532 | 2.033453  |
| 45 | 1 | 0 | 2.782893  | -4.578521 | -0.258894 |
| 46 | 1 | 0 | 0.506702  | -5.540889 | -0.227892 |
| 47 | 1 | 0 | -1.856113 | -1.687818 | -2.438568 |
| 48 | 6 | 0 | -4.070011 | -1.001222 | 1.596728  |
| 49 | 1 | 0 | -4.021903 | -1.728210 | -3.606309 |
| 50 | 6 | 0 | -6.400525 | -1.078933 | 0.063001  |
| 51 | 6 | 0 | -6.487898 | -0.882814 | 1.418489  |
| 52 | 6 | 0 | -5.305611 | -0.842434 | 2.200310  |
| 53 | 1 | 0 | -7.287222 | -1.114305 | -0.557494 |
| 54 | 1 | 0 | -7.458114 | -0.761728 | 1.880229  |
| 55 | 8 | 0 | -5.291605 | -0.652756 | 3.543097  |
| 56 | 1 | 0 | -3.206321 | -0.964486 | 2.248483  |
| 57 | 6 | 0 | -6.527991 | -0.488241 | 4.239039  |
| 58 | 1 | 0 | -7.162432 | -1.374027 | 4.139272  |
| 59 | 1 | 0 | -6.258276 | -0.355145 | 5.284541  |
| 60 | 1 | 0 | -7.067844 | 0.396930  | 3.889331  |
| 61 | 6 | 0 | 2.779501  | -5.062193 | -2.803731 |
| 62 | 1 | 0 | 2.750354  | -5.182826 | -3.880057 |
| 63 | 6 | 0 | 1.981828  | -4.202615 | -2.178209 |
| 64 | 1 | 0 | 1.292532  | -3.598860 | -2.766134 |
| 65 | 1 | 0 | 3.490852  | -5.679553 | -2.263462 |
| 66 | 1 | 0 | 0.003741  | -1.723638 | -1.298299 |
| 67 | 1 | 0 | 1.099390  | -1.018700 | 0.723107  |
| 68 | 7 | 0 | -0.912757 | 0.058333  | 0.583907  |
| 69 | 1 | 0 | -1.325014 | 0.367803  | 1.455618  |
| 70 | 6 | 0 | -1.060391 | 1.101897  | -0.390382 |
| 71 | 6 | 0 | -0.172741 | 1.028610  | -1.582304 |
| 72 | 6 | 0 | -0.696530 | 1.118800  | -2.880149 |
| 73 | 6 | 0 | 1.217293  | 0.898028  | -1.433004 |
| 74 | 6 | 0 | 0.141354  | 1.071020  | -3.992568 |
| 75 | 6 | 0 | 2.055225  | 0.855468  | -2.544823 |
| 76 | 6 | 0 | 1.518419  | 0.935990  | -3.829898 |
| 77 | 6 | 0 | -2.004683 | 3.369357  | -0.887670 |
| 78 | 6 | 0 | -1.896478 | 2.137645  | -0.141184 |
| 79 | 6 | 0 | -2.893999 | 4.338680  | -0.588890 |
| 80 | 6 | 0 | -3.044559 | 5.623787  | -1.285499 |
| 81 | 6 | 0 | -2.018883 | 6.245372  | -1.884321 |

|    |   |   |           |          |           |
|----|---|---|-----------|----------|-----------|
| 82 | 6 | 0 | -4.431520 | 6.223004 | -1.260565 |
| 83 | 1 | 0 | -1.766957 | 1.219436 | -3.012572 |
| 84 | 1 | 0 | 1.646112  | 0.872104 | -0.437649 |
| 85 | 1 | 0 | -0.283493 | 1.142156 | -4.987307 |
| 86 | 1 | 0 | 3.128125  | 0.780053 | -2.405913 |
| 87 | 1 | 0 | 2.169372  | 0.905684 | -4.695865 |
| 88 | 1 | 0 | -1.337604 | 3.509690 | -1.731811 |
| 89 | 1 | 0 | -2.533247 | 2.061761 | 0.738960  |
| 90 | 1 | 0 | -3.598345 | 4.156007 | 0.222160  |
| 91 | 1 | 0 | -1.011502 | 5.846515 | -1.856134 |
| 92 | 1 | 0 | -2.157546 | 7.185766 | -2.404771 |
| 93 | 1 | 0 | -5.159114 | 5.551600 | -1.728189 |
| 94 | 1 | 0 | -4.463054 | 7.180046 | -1.782546 |
| 95 | 1 | 0 | -4.764837 | 6.386573 | -0.229765 |

**2-8-TS-exo**

Energy + zep (gas) = -2109.78291 au

Gibbs free energy (gas) = -2109.86428 au

Gibbs free energy (in solvent) = -2109.11941 au

Zero-point correction = 0.79350 au

Thermal correction to Gibbs free energy = 0.71214 au

Standard orientation:

| Center<br>Number | Atomic<br>Number | Atomic<br>Type | Coordinates (Angstroms) |           |           |
|------------------|------------------|----------------|-------------------------|-----------|-----------|
|                  |                  |                | X                       | Y         | Z         |
| 1                | 6                | 0              | 3.022037                | -0.613217 | -1.297116 |
| 2                | 6                | 0              | 3.147979                | -1.872709 | -1.965066 |
| 3                | 6                | 0              | 4.313734                | -2.514431 | -1.545071 |
| 4                | 6                | 0              | 5.045721                | -1.541697 | -0.653358 |
| 5                | 7                | 0              | 4.167469                | -0.445445 | -0.477139 |
| 6                | 8                | 0              | 2.117172                | 0.236269  | -1.368072 |
| 7                | 8                | 0              | 6.139175                | -1.648846 | -0.163243 |
| 8                | 6                | 0              | 4.477573                | 0.702017  | 0.307479  |
| 9                | 6                | 0              | 4.430108                | 1.977042  | -0.261537 |
| 10               | 6                | 0              | 4.864934                | 0.549087  | 1.640373  |
| 11               | 6                | 0              | 4.743976                | 3.093726  | 0.508892  |
| 12               | 6                | 0              | 5.125855                | 2.944004  | 1.840920  |
| 13               | 6                | 0              | 5.194178                | 1.669143  | 2.399279  |
| 14               | 1                | 0              | 2.456054                | -2.192072 | -2.725755 |
| 15               | 1                | 0              | 4.906941                | -3.178605 | -2.157389 |
| 16               | 1                | 0              | 4.170555                | 2.083722  | -1.306768 |
| 17               | 1                | 0              | 4.929048                | -0.441810 | 2.070522  |

|    |   |   |           |           |           |
|----|---|---|-----------|-----------|-----------|
| 18 | 1 | 0 | 4.714480  | 4.080285  | 0.060350  |
| 19 | 1 | 0 | 5.386429  | 3.812832  | 2.433774  |
| 20 | 1 | 0 | 5.511300  | 1.542429  | 3.427873  |
| 21 | 7 | 0 | -0.108899 | 1.842962  | -1.441377 |
| 22 | 6 | 0 | -1.176103 | 1.835564  | -0.351540 |
| 23 | 6 | 0 | -0.685905 | 1.920963  | -2.832980 |
| 24 | 6 | 0 | 0.806740  | 3.028862  | -1.217040 |
| 25 | 6 | 0 | -2.110684 | 0.604394  | -0.460653 |
| 26 | 6 | 0 | -1.944347 | 3.182893  | -0.438212 |
| 27 | 6 | 0 | -1.630947 | 3.139150  | -2.920144 |
| 28 | 6 | 0 | 0.048654  | 4.350035  | -1.508252 |
| 29 | 6 | 0 | -3.067954 | 0.484627  | 0.726908  |
| 30 | 6 | 0 | -1.456021 | 3.995496  | -1.651858 |
| 31 | 6 | 0 | -2.795527 | 1.013830  | 1.966079  |
| 32 | 6 | 0 | -4.314526 | -0.201962 | 0.549421  |
| 33 | 6 | 0 | -3.727173 | 0.874479  | 3.022241  |
| 34 | 6 | 0 | -5.183541 | -0.278755 | 1.687836  |
| 35 | 7 | 0 | -4.876726 | 0.256712  | 2.900144  |
| 36 | 1 | 0 | -1.181282 | 0.975990  | -3.044841 |
| 37 | 1 | 0 | 0.167622  | 1.999393  | -3.506052 |
| 38 | 1 | 0 | 1.671537  | 2.879220  | -1.859720 |
| 39 | 1 | 0 | 1.152334  | 2.965214  | -0.185575 |
| 40 | 1 | 0 | -2.744343 | 0.785615  | -1.332797 |
| 41 | 1 | 0 | -1.817891 | 3.748035  | 0.485847  |
| 42 | 1 | 0 | -3.015125 | 2.990333  | -0.534466 |
| 43 | 1 | 0 | -1.400119 | 3.722441  | -3.813341 |
| 44 | 1 | 0 | -2.670389 | 2.814587  | -3.010609 |
| 45 | 1 | 0 | 0.384961  | 4.743964  | -2.472019 |
| 46 | 1 | 0 | -2.038857 | 4.913342  | -1.737745 |
| 47 | 1 | 0 | -1.866739 | 1.527514  | 2.177853  |
| 48 | 6 | 0 | -4.736546 | -0.794418 | -0.659866 |
| 49 | 1 | 0 | -3.496487 | 1.293750  | 3.997797  |
| 50 | 6 | 0 | -6.429691 | -0.937181 | 1.554630  |
| 51 | 6 | 0 | -6.820034 | -1.501515 | 0.366346  |
| 52 | 6 | 0 | -5.962059 | -1.430922 | -0.760594 |
| 53 | 1 | 0 | -7.065218 | -0.976029 | 2.430467  |
| 54 | 1 | 0 | -7.779294 | -1.995718 | 0.297708  |
| 55 | 8 | 0 | -6.258937 | -1.960426 | -1.971911 |
| 56 | 1 | 0 | -4.123448 | -0.783150 | -1.551504 |
| 57 | 6 | 0 | -7.505044 | -2.635664 | -2.154306 |
| 58 | 1 | 0 | -8.350833 | -1.961586 | -1.989377 |
| 59 | 1 | 0 | -7.506802 | -2.968400 | -3.189960 |
| 60 | 1 | 0 | -7.587184 | -3.504597 | -1.494635 |
| 61 | 6 | 0 | 0.861192  | 6.588499  | -0.722155 |

|    |   |   |           |           |           |
|----|---|---|-----------|-----------|-----------|
| 62 | 1 | 0 | 1.043055  | 7.310345  | 0.065034  |
| 63 | 6 | 0 | 0.339042  | 5.393998  | -0.462567 |
| 64 | 1 | 0 | 0.100322  | 5.132484  | 0.566860  |
| 65 | 1 | 0 | 1.123958  | 6.891208  | -1.731166 |
| 66 | 1 | 0 | -0.599508 | 1.767882  | 0.567928  |
| 67 | 1 | 0 | 0.498239  | 1.001167  | -1.379474 |
| 68 | 7 | 0 | -1.401043 | -0.632543 | -0.804135 |
| 69 | 1 | 0 | -1.665749 | -1.031595 | -1.692642 |
| 70 | 6 | 0 | -0.525273 | -1.419495 | -0.089356 |
| 71 | 6 | 0 | -0.148053 | -1.056032 | 1.312370  |
| 72 | 6 | 0 | -0.777521 | -1.753521 | 2.352398  |
| 73 | 6 | 0 | 0.831024  | -0.106107 | 1.628165  |
| 74 | 6 | 0 | -0.461767 | -1.479816 | 3.679740  |
| 75 | 6 | 0 | 1.150541  | 0.159975  | 2.959522  |
| 76 | 6 | 0 | 0.498838  | -0.518178 | 3.987110  |
| 77 | 6 | 0 | 1.132615  | -3.222762 | -0.271358 |
| 78 | 6 | 0 | -0.051788 | -2.567843 | -0.680143 |
| 79 | 6 | 0 | 1.653431  | -4.372158 | -0.841349 |
| 80 | 6 | 0 | 2.986741  | -4.802482 | -0.686865 |
| 81 | 6 | 0 | 3.951760  | -3.978522 | -0.092859 |
| 82 | 6 | 0 | 3.424669  | -6.084230 | -1.348345 |
| 83 | 1 | 0 | -1.519326 | -2.507084 | 2.116774  |
| 84 | 1 | 0 | 1.382537  | 0.384181  | 0.835935  |
| 85 | 1 | 0 | -0.961765 | -2.023785 | 4.472369  |
| 86 | 1 | 0 | 1.927490  | 0.880977  | 3.185927  |
| 87 | 1 | 0 | 0.751211  | -0.312678 | 5.020872  |
| 88 | 1 | 0 | 1.667096  | -2.771871 | 0.557408  |
| 89 | 1 | 0 | -0.502808 | -2.884612 | -1.618886 |
| 90 | 1 | 0 | 1.026603  | -4.925805 | -1.536331 |
| 91 | 1 | 0 | 3.646918  | -3.256061 | 0.654529  |
| 92 | 1 | 0 | 4.956239  | -4.361936 | 0.048279  |
| 93 | 1 | 0 | 4.434129  | -5.999035 | -1.758675 |
| 94 | 1 | 0 | 2.746154  | -6.385472 | -2.148979 |
| 95 | 1 | 0 | 3.448029  | -6.897787 | -0.614764 |

---

**2-8-IM-exo**

Energy + zep (gas) = -2109.84123 au

Gibbs free energy (gas) = -2109.92208 au

Gibbs free energy (in solvent) = -2109.19512 au

Zero-point correction = 0.79938 au

Thermal correction to Gibbs free energy = 0.71853 au

Standard orientation:

---

| Center<br>Number | Atomic<br>Number | Atomic<br>Type | Coordinates (Angstroms) |           |           |
|------------------|------------------|----------------|-------------------------|-----------|-----------|
|                  |                  |                | X                       | Y         | Z         |
| 1                | 6                | 0              | 3.223701                | -0.511712 | -1.036310 |
| 2                | 6                | 0              | 2.915126                | -1.942340 | -1.436264 |
| 3                | 6                | 0              | 4.235989                | -2.707528 | -1.227301 |
| 4                | 6                | 0              | 5.136305                | -1.730156 | -0.485542 |
| 5                | 7                | 0              | 4.487458                | -0.459903 | -0.482370 |
| 6                | 8                | 0              | 2.474572                | 0.448647  | -1.149683 |
| 7                | 8                | 0              | 6.199378                | -1.944400 | 0.023706  |
| 8                | 6                | 0              | 5.084746                | 0.726300  | 0.064939  |
| 9                | 6                | 0              | 5.269063                | 1.844513  | -0.746895 |
| 10               | 6                | 0              | 5.492072                | 0.739067  | 1.397715  |
| 11               | 6                | 0              | 5.852868                | 2.989631  | -0.212704 |
| 12               | 6                | 0              | 6.259880                | 3.012524  | 1.120000  |
| 13               | 6                | 0              | 6.082604                | 1.886441  | 1.920666  |
| 14               | 1                | 0              | 2.614283                | -1.943119 | -2.486870 |
| 15               | 1                | 0              | 4.710756                | -2.880294 | -2.198089 |
| 16               | 1                | 0              | 4.968441                | 1.812133  | -1.786608 |
| 17               | 1                | 0              | 5.367337                | -0.143998 | 2.010649  |
| 18               | 1                | 0              | 6.003494                | 3.858641  | -0.842331 |
| 19               | 1                | 0              | 6.724178                | 3.901617  | 1.529931  |
| 20               | 1                | 0              | 6.410614                | 1.895693  | 2.953247  |
| 21               | 7                | 0              | -0.146272               | 1.703983  | -1.137226 |
| 22               | 6                | 0              | -1.298529               | 1.680809  | -0.130540 |
| 23               | 6                | 0              | -0.622217               | 1.823865  | -2.563816 |
| 24               | 6                | 0              | 0.765642                | 2.874272  | -0.807006 |
| 25               | 6                | 0              | -2.283868               | 0.507149  | -0.356446 |
| 26               | 6                | 0              | -2.003624               | 3.064685  | -0.213820 |
| 27               | 6                | 0              | -1.552210               | 3.051458  | -2.678479 |
| 28               | 6                | 0              | 0.060418                | 4.209033  | -1.152417 |
| 29               | 6                | 0              | -3.342508               | 0.452743  | 0.752450  |
| 30               | 6                | 0              | -1.438431               | 3.884706  | -1.387720 |
| 31               | 6                | 0              | -3.116246               | 0.891954  | 2.035095  |
| 32               | 6                | 0              | -4.634294               | -0.093420 | 0.452008  |
| 33               | 6                | 0              | -4.136121               | 0.803128  | 3.012908  |
| 34               | 6                | 0              | -5.593330               | -0.129086 | 1.517799  |
| 35               | 7                | 0              | -5.330119               | 0.317557  | 2.776194  |
| 36               | 1                | 0              | -1.110412               | 0.888827  | -2.831141 |
| 37               | 1                | 0              | 0.276647                | 1.916253  | -3.173223 |
| 38               | 1                | 0              | 1.691336                | 2.715657  | -1.353414 |
| 39               | 1                | 0              | 0.994046                | 2.791786  | 0.255915  |
| 40               | 1                | 0              | -2.832848               | 0.746804  | -1.270494 |
| 41               | 1                | 0              | -1.889443               | 3.605015  | 0.726738  |

|    |   |   |           |           |           |
|----|---|---|-----------|-----------|-----------|
| 42 | 1 | 0 | -3.076240 | 2.918496  | -0.352404 |
| 43 | 1 | 0 | -1.267807 | 3.648430  | -3.546963 |
| 44 | 1 | 0 | -2.587189 | 2.737138  | -2.831395 |
| 45 | 1 | 0 | 0.467759  | 4.590617  | -2.093685 |
| 46 | 1 | 0 | -2.001226 | 4.813006  | -1.492252 |
| 47 | 1 | 0 | -2.159690 | 1.296117  | 2.341722  |
| 48 | 6 | 0 | -5.016150 | -0.593301 | -0.811707 |
| 49 | 1 | 0 | -3.940022 | 1.151375  | 4.023604  |
| 50 | 6 | 0 | -6.883602 | -0.651129 | 1.261081  |
| 51 | 6 | 0 | -7.233068 | -1.125236 | 0.021419  |
| 52 | 6 | 0 | -6.285872 | -1.097592 | -1.033110 |
| 53 | 1 | 0 | -7.586339 | -0.661554 | 2.084846  |
| 54 | 1 | 0 | -8.227537 | -1.517396 | -0.140966 |
| 55 | 8 | 0 | -6.536082 | -1.547159 | -2.288106 |
| 56 | 1 | 0 | -4.335188 | -0.614558 | -1.652110 |
| 57 | 6 | 0 | -7.819265 | -2.094839 | -2.591806 |
| 58 | 1 | 0 | -8.612075 | -1.352316 | -2.459179 |
| 59 | 1 | 0 | -7.771449 | -2.385846 | -3.639017 |
| 60 | 1 | 0 | -8.031110 | -2.977464 | -1.980709 |
| 61 | 6 | 0 | 0.880849  | 6.427815  | -0.319852 |
| 62 | 1 | 0 | 1.027197  | 7.148794  | 0.475481  |
| 63 | 6 | 0 | 0.307549  | 5.250375  | -0.093072 |
| 64 | 1 | 0 | -0.012085 | 5.002616  | 0.917675  |
| 65 | 1 | 0 | 1.223176  | 6.716758  | -1.308837 |
| 66 | 1 | 0 | -0.793079 | 1.551174  | 0.824476  |
| 67 | 1 | 0 | 0.432162  | 0.852362  | -1.052076 |
| 68 | 7 | 0 | -1.675165 | -0.807618 | -0.620877 |
| 69 | 1 | 0 | -1.868106 | -1.152822 | -1.549240 |
| 70 | 6 | 0 | -0.437269 | -1.258964 | -0.116315 |
| 71 | 6 | 0 | -0.246497 | -1.172195 | 1.364065  |
| 72 | 6 | 0 | -1.145240 | -1.835806 | 2.209194  |
| 73 | 6 | 0 | 0.824728  | -0.471590 | 1.934334  |
| 74 | 6 | 0 | -0.965964 | -1.814006 | 3.588503  |
| 75 | 6 | 0 | 0.993792  | -0.437098 | 3.318244  |
| 76 | 6 | 0 | 0.101469  | -1.112022 | 4.147694  |
| 77 | 6 | 0 | 1.726252  | -2.539216 | -0.613030 |
| 78 | 6 | 0 | 0.444269  | -1.838540 | -0.956191 |
| 79 | 6 | 0 | 1.687709  | -4.034595 | -0.882901 |
| 80 | 6 | 0 | 2.804306  | -4.766028 | -0.836774 |
| 81 | 6 | 0 | 4.105886  | -4.068347 | -0.501434 |
| 82 | 6 | 0 | 2.838274  | -6.252643 | -1.044976 |
| 83 | 1 | 0 | -1.980078 | -2.374018 | 1.776829  |
| 84 | 1 | 0 | 1.530184  | 0.048866  | 1.296077  |
| 85 | 1 | 0 | -1.661553 | -2.344339 | 4.228309  |



|    |   |   |          |           |           |
|----|---|---|----------|-----------|-----------|
| 86 | 1 | 0 | 1.825870 | 0.111315  | 3.745017  |
| 87 | 1 | 0 | 0.237220 | -1.093813 | 5.222717  |
| 88 | 1 | 0 | 1.943309 | -2.387988 | 0.450982  |
| 89 | 1 | 0 | 0.183955 | -1.861238 | -2.015327 |
| 90 | 1 | 0 | 0.723604 | -4.490855 | -1.082531 |
| 91 | 1 | 0 | 4.154088 | -3.907482 | 0.582907  |
| 92 | 1 | 0 | 4.966559 | -4.692221 | -0.746356 |
| 93 | 1 | 0 | 1.843678 | -6.655449 | -1.243355 |
| 94 | 1 | 0 | 3.242395 | -6.760215 | -0.161994 |
| 95 | 1 | 0 | 3.491795 | -6.515846 | -1.884053 |

### 3-1-COM-endo

Energy + zep (gas) = -2188.40122 au

Gibbs free energy (gas) = -2188.49345 au

Gibbs free energy (in solvent) = -2187.70558 au

Zero-point correction = 0.84845 au

Thermal correction to Gibbs free energy = 0.75623 au

Standard orientation:

| Center<br>Number | Atomic<br>Number | Atomic<br>Type | Coordinates (Angstroms) |           |           |
|------------------|------------------|----------------|-------------------------|-----------|-----------|
|                  |                  |                | X                       | Y         | Z         |
| 1                | 1                | 0              | -0.684540               | 2.219285  | 0.825087  |
| 2                | 7                | 0              | -1.453695               | 2.637151  | 0.277577  |
| 3                | 6                | 0              | -2.388424               | 1.527018  | -0.196517 |
| 4                | 6                | 0              | -0.822961               | 3.405455  | -0.868668 |
| 5                | 6                | 0              | -2.245939               | 3.585847  | 1.141934  |
| 6                | 6                | 0              | -1.588611               | 0.249104  | -0.542561 |
| 7                | 6                | 0              | -3.293823               | 2.129817  | -1.285541 |
| 8                | 6                | 0              | -1.924638               | 4.177022  | -1.623617 |
| 9                | 6                | 0              | -3.479430               | 4.105241  | 0.337209  |
| 10               | 6                | 0              | -2.412419               | -0.743413 | -1.369431 |
| 11               | 6                | 0              | -3.294020               | 3.666537  | -1.144361 |
| 12               | 6                | 0              | -3.572211               | -1.430124 | -0.881850 |
| 13               | 6                | 0              | -2.017380               | -0.990278 | -2.664766 |
| 14               | 6                | 0              | -4.218356               | -2.334542 | -1.791496 |
| 15               | 6                | 0              | -2.733202               | -1.900108 | -3.476965 |
| 16               | 7                | 0              | -3.791753               | -2.554248 | -3.064864 |
| 17               | 1                | 0              | -0.285555               | 2.688469  | -1.485343 |
| 18               | 1                | 0              | -0.078961               | 4.057587  | -0.414190 |
| 19               | 1                | 0              | -1.572362               | 4.391352  | 1.434334  |
| 20               | 1                | 0              | -2.539351               | 3.042288  | 2.040003  |
| 21               | 1                | 0              | -0.734609               | 0.531563  | -1.163767 |

|    |   |   |           |           |           |
|----|---|---|-----------|-----------|-----------|
| 22 | 1 | 0 | -4.295413 | 1.710392  | -1.188628 |
| 23 | 1 | 0 | -2.935957 | 1.858176  | -2.281693 |
| 24 | 1 | 0 | -1.835358 | 5.251728  | -1.448422 |
| 25 | 1 | 0 | -1.814102 | 4.015677  | -2.697560 |
| 26 | 1 | 0 | -3.452858 | 5.197853  | 0.357223  |
| 27 | 1 | 0 | -4.094442 | 4.098748  | -1.745617 |
| 28 | 6 | 0 | -4.127865 | -1.278278 | 0.409329  |
| 29 | 1 | 0 | -1.146118 | -0.490441 | -3.075589 |
| 30 | 6 | 0 | -5.367895 | -3.039413 | -1.359269 |
| 31 | 1 | 0 | -2.407082 | -2.086852 | -4.496839 |
| 32 | 7 | 0 | -1.022911 | -0.257410 | 0.709728  |
| 33 | 1 | 0 | -1.720366 | -0.499315 | 1.401632  |
| 34 | 6 | 0 | -5.737279 | 4.511129  | 1.347638  |
| 35 | 1 | 0 | -6.669519 | 4.153957  | 1.768687  |
| 36 | 6 | 0 | -4.790315 | 3.671056  | 0.941971  |
| 37 | 1 | 0 | -4.959755 | 2.600315  | 1.041994  |
| 38 | 1 | 0 | -5.617393 | 5.587581  | 1.271618  |
| 39 | 1 | 0 | -2.993827 | 1.307378  | 0.683403  |
| 40 | 6 | 0 | 2.038465  | -2.253417 | -0.297106 |
| 41 | 6 | 0 | 0.795923  | -1.517060 | -0.324323 |
| 42 | 6 | 0 | 0.068505  | -1.150405 | 0.761200  |
| 43 | 1 | 0 | 2.469203  | -2.473997 | 0.674641  |
| 44 | 1 | 0 | 0.450214  | -1.217525 | -1.306511 |
| 45 | 6 | 0 | 2.689436  | -2.677725 | -1.401493 |
| 46 | 6 | 0 | 3.973272  | -3.392777 | -1.428659 |
| 47 | 6 | 0 | 4.922576  | -3.229504 | -0.494651 |
| 48 | 6 | 0 | 0.354872  | -1.610519 | 2.148174  |
| 49 | 6 | 0 | 0.479072  | -0.689450 | 3.199279  |
| 50 | 6 | 0 | 0.462393  | -2.978611 | 2.434767  |
| 51 | 6 | 0 | 0.719791  | -1.126914 | 4.498624  |
| 52 | 1 | 0 | 0.415696  | 0.371227  | 2.987216  |
| 53 | 6 | 0 | 0.699418  | -3.413071 | 3.735986  |
| 54 | 1 | 0 | 0.345367  | -3.699535 | 1.634595  |
| 55 | 6 | 0 | 0.829665  | -2.489438 | 4.771007  |
| 56 | 1 | 0 | 0.826874  | -0.403667 | 5.299348  |
| 57 | 1 | 0 | 0.775340  | -4.474545 | 3.941807  |
| 58 | 1 | 0 | 1.014065  | -2.829163 | 5.783612  |
| 59 | 6 | 0 | 4.171368  | -4.332427 | -2.596321 |
| 60 | 1 | 0 | 4.076877  | -3.797935 | -3.548440 |
| 61 | 1 | 0 | 5.153372  | -4.806378 | -2.569211 |
| 62 | 1 | 0 | 2.214102  | -2.522905 | -2.370088 |
| 63 | 1 | 0 | 3.409384  | -5.118621 | -2.599068 |
| 64 | 1 | 0 | 4.805365  | -2.529329 | 0.324737  |
| 65 | 1 | 0 | 5.844691  | -3.798469 | -0.524329 |

|     |   |   |           |           |           |
|-----|---|---|-----------|-----------|-----------|
| 66  | 6 | 0 | -5.883100 | -2.875300 | -0.098207 |
| 67  | 6 | 0 | -5.256232 | -1.977599 | 0.801465  |
| 68  | 8 | 0 | -5.692606 | -1.739756 | 2.063427  |
| 69  | 6 | 0 | -6.820801 | -2.461337 | 2.560932  |
| 70  | 1 | 0 | -6.634004 | -3.539256 | 2.561999  |
| 71  | 1 | 0 | -6.956946 | -2.118764 | 3.584478  |
| 72  | 1 | 0 | -7.723011 | -2.240438 | 1.982493  |
| 73  | 1 | 0 | -6.762504 | -3.429981 | 0.198667  |
| 74  | 1 | 0 | -3.700964 | -0.617290 | 1.150713  |
| 75  | 1 | 0 | -5.827279 | -3.715302 | -2.069670 |
| 76  | 6 | 0 | 5.233921  | 1.243618  | 0.967510  |
| 77  | 6 | 0 | 4.742191  | 1.749590  | 2.188892  |
| 78  | 6 | 0 | 6.566879  | 0.783050  | 0.920895  |
| 79  | 6 | 0 | 5.557479  | 1.787561  | 3.309641  |
| 80  | 6 | 0 | 6.873226  | 1.323111  | 3.244456  |
| 81  | 6 | 0 | 7.377030  | 0.819279  | 2.046711  |
| 82  | 1 | 0 | 5.169767  | 2.181491  | 4.241529  |
| 83  | 1 | 0 | 3.728652  | 2.116657  | 2.265373  |
| 84  | 1 | 0 | 7.502676  | 1.356506  | 4.126098  |
| 85  | 1 | 0 | 8.397118  | 0.458977  | 1.991951  |
| 86  | 1 | 0 | 6.957520  | 0.391316  | -0.011697 |
| 87  | 6 | 0 | 2.633356  | 1.276105  | -1.944299 |
| 88  | 8 | 0 | 1.467845  | 1.484927  | -2.229502 |
| 89  | 6 | 0 | 3.180558  | 1.449632  | -0.564992 |
| 90  | 6 | 0 | 4.477891  | 1.160399  | -0.264722 |
| 91  | 6 | 0 | 2.209624  | 1.913668  | 0.365230  |
| 92  | 8 | 0 | 3.555496  | 0.883589  | -2.819228 |
| 93  | 6 | 0 | 3.126033  | 0.677583  | -4.197590 |
| 94  | 6 | 0 | 4.356298  | 0.334352  | -5.008407 |
| 95  | 1 | 0 | 2.639710  | 1.591097  | -4.543754 |
| 96  | 1 | 0 | 2.389222  | -0.127979 | -4.203989 |
| 97  | 1 | 0 | 4.070939  | 0.165985  | -6.049645 |
| 98  | 1 | 0 | 4.832672  | -0.573075 | -4.632665 |
| 99  | 1 | 0 | 5.082937  | 1.148642  | -4.981424 |
| 100 | 7 | 0 | 1.381653  | 2.298448  | 1.075748  |
| 101 | 1 | 0 | 5.045530  | 0.792049  | -1.112234 |

---

### 3-1-TS1-endo

Energy + zep (gas) = -2188.37895 au

Gibbs free energy (gas) = -2188.46510 au

Gibbs free energy (in solvent) = -2187.68300 au

Zero-point correction = 0.84877 au

Thermal correction to Gibbs free energy = 0.76263 au

## Standard orientation:

| Center<br>Number | Atomic<br>Number | Atomic<br>Type | Coordinates (Angstroms) |           |           |
|------------------|------------------|----------------|-------------------------|-----------|-----------|
|                  |                  |                | X                       | Y         | Z         |
| 1                | 1                | 0              | -0.257805               | -1.365545 | 1.503855  |
| 2                | 7                | 0              | -1.015378               | -1.075910 | 2.159423  |
| 3                | 6                | 0              | -2.180253               | -0.426730 | 1.413662  |
| 4                | 6                | 0              | -0.359447               | -0.133947 | 3.152676  |
| 5                | 6                | 0              | -1.535683               | -2.290100 | 2.886450  |
| 6                | 6                | 0              | -1.671279               | 0.433372  | 0.223736  |
| 7                | 6                | 0              | -3.059251               | 0.271761  | 2.471318  |
| 8                | 6                | 0              | -1.357956               | 0.187688  | 4.282247  |
| 9                | 6                | 0              | -2.707826               | -1.871586 | 3.828049  |
| 10               | 6                | 0              | -2.618695               | 1.563094  | -0.178847 |
| 11               | 6                | 0              | -2.748537               | -0.317145 | 3.862565  |
| 12               | 6                | 0              | -3.927045               | 1.350823  | -0.719602 |
| 13               | 6                | 0              | -2.180920               | 2.859434  | -0.029243 |
| 14               | 6                | 0              | -4.673544               | 2.521715  | -1.081563 |
| 15               | 6                | 0              | -3.007429               | 3.942119  | -0.413174 |
| 16               | 7                | 0              | -4.205135               | 3.789748  | -0.924331 |
| 17               | 1                | 0              | -0.018520               | 0.738131  | 2.598208  |
| 18               | 1                | 0              | 0.531888                | -0.652199 | 3.503538  |
| 19               | 1                | 0              | -0.695212               | -2.716126 | 3.434169  |
| 20               | 1                | 0              | -1.850896               | -3.012966 | 2.133529  |
| 21               | 1                | 0              | -0.738161               | 0.909969  | 0.533758  |
| 22               | 1                | 0              | -4.107176               | 0.147337  | 2.198128  |
| 23               | 1                | 0              | -2.866386               | 1.347035  | 2.484180  |
| 24               | 1                | 0              | -1.049478               | -0.282767 | 5.218812  |
| 25               | 1                | 0              | -1.381849               | 1.265138  | 4.455871  |
| 26               | 1                | 0              | -2.463435               | -2.212103 | 4.837541  |
| 27               | 1                | 0              | -3.504139               | 0.003592  | 4.580455  |
| 28               | 6                | 0              | -4.529963               | 0.087893  | -0.913531 |
| 29               | 6                | 0              | -5.970758               | 2.365758  | -1.627268 |
| 30               | 7                | 0              | -1.318438               | -0.470346 | -0.874145 |
| 31               | 1                | 0              | -2.024745               | -1.125672 | -1.176050 |
| 32               | 6                | 0              | -4.736380               | -3.287913 | 4.237012  |
| 33               | 1                | 0              | -5.678625               | -3.715471 | 3.915585  |
| 34               | 6                | 0              | -4.018166               | -2.506011 | 3.437325  |
| 35               | 1                | 0              | -4.389731               | -2.296864 | 2.435495  |
| 36               | 1                | 0              | -4.410260               | -3.528552 | 5.244262  |
| 37               | 1                | 0              | -2.729462               | -1.275315 | 1.003594  |
| 38               | 6                | 0              | 1.922997                | 0.759384  | -2.065592 |
| 39               | 6                | 0              | 0.558668                | 0.787931  | -1.715519 |

|    |   |   |           |           |           |
|----|---|---|-----------|-----------|-----------|
| 40 | 6 | 0 | -0.232448 | -0.346869 | -1.697472 |
| 41 | 1 | 0 | 2.345072  | -0.216431 | -2.281478 |
| 42 | 1 | 0 | 0.172327  | 1.701233  | -1.281225 |
| 43 | 6 | 0 | 2.771350  | 1.853065  | -2.094710 |
| 44 | 6 | 0 | 4.180130  | 1.769173  | -2.053937 |
| 45 | 6 | 0 | 4.838883  | 0.572777  | -1.750481 |
| 46 | 6 | 0 | 0.029281  | -1.523878 | -2.558990 |
| 47 | 6 | 0 | -0.064962 | -2.830243 | -2.052761 |
| 48 | 6 | 0 | 0.340603  | -1.343632 | -3.915496 |
| 49 | 6 | 0 | 0.154801  | -3.924796 | -2.881051 |
| 50 | 1 | 0 | -0.257999 | -2.981372 | -0.997941 |
| 51 | 6 | 0 | 0.553571  | -2.442170 | -4.742323 |
| 52 | 1 | 0 | 0.388951  | -0.340434 | -4.320434 |
| 53 | 6 | 0 | 0.461156  | -3.733684 | -4.228188 |
| 54 | 1 | 0 | 0.098895  | -4.928035 | -2.474808 |
| 55 | 1 | 0 | 0.783631  | -2.289066 | -5.790072 |
| 56 | 1 | 0 | 0.628621  | -4.588337 | -4.873137 |
| 57 | 6 | 0 | 4.984911  | 3.036489  | -2.187859 |
| 58 | 1 | 0 | 4.395899  | 3.923201  | -1.946480 |
| 59 | 1 | 0 | 5.872004  | 3.020204  | -1.551066 |
| 60 | 1 | 0 | 2.327473  | 2.844647  | -2.058080 |
| 61 | 1 | 0 | 5.332529  | 3.146422  | -3.221391 |
| 62 | 1 | 0 | 4.358577  | -0.373041 | -1.963042 |
| 63 | 1 | 0 | 5.920435  | 0.547943  | -1.823849 |
| 64 | 6 | 0 | -6.531179 | 1.126623  | -1.810341 |
| 65 | 6 | 0 | -5.802473 | -0.033075 | -1.445033 |
| 66 | 1 | 0 | -6.506159 | 3.268562  | -1.893304 |
| 67 | 1 | 0 | -7.524321 | 1.044047  | -2.229705 |
| 68 | 8 | 0 | -6.272549 | -1.297918 | -1.578119 |
| 69 | 1 | 0 | -4.032378 | -0.837099 | -0.653778 |
| 70 | 6 | 0 | -7.566742 | -1.507303 | -2.146604 |
| 71 | 1 | 0 | -8.349550 | -1.046383 | -1.536787 |
| 72 | 1 | 0 | -7.708270 | -2.585829 | -2.158680 |
| 73 | 1 | 0 | -7.618314 | -1.124459 | -3.170123 |
| 74 | 1 | 0 | -2.651828 | 4.961948  | -0.292460 |
| 75 | 1 | 0 | -1.195993 | 3.061687  | 0.379479  |
| 76 | 6 | 0 | 5.408157  | -0.981822 | 0.463933  |
| 77 | 6 | 0 | 4.920281  | -2.255409 | 0.133104  |
| 78 | 6 | 0 | 6.728157  | -0.875966 | 0.929718  |
| 79 | 6 | 0 | 5.721627  | -3.382196 | 0.283546  |
| 80 | 6 | 0 | 7.025103  | -3.262995 | 0.763044  |
| 81 | 6 | 0 | 7.526436  | -2.004064 | 1.085742  |
| 82 | 1 | 0 | 5.327867  | -4.357672 | 0.022024  |
| 83 | 1 | 0 | 3.914309  | -2.375390 | -0.248589 |

|     |   |   |          |           |          |
|-----|---|---|----------|-----------|----------|
| 84  | 1 | 0 | 7.646240 | -4.143456 | 0.878597 |
| 85  | 1 | 0 | 8.539502 | -1.899674 | 1.456499 |
| 86  | 1 | 0 | 7.126029 | 0.101382  | 1.181885 |
| 87  | 6 | 0 | 2.636497 | 1.668209  | 1.038217 |
| 88  | 8 | 0 | 1.454988 | 1.831927  | 1.335116 |
| 89  | 6 | 0 | 3.242147 | 0.382764  | 0.691390 |
| 90  | 6 | 0 | 4.614708 | 0.264641  | 0.340415 |
| 91  | 6 | 0 | 2.331175 | -0.683139 | 0.798214 |
| 92  | 8 | 0 | 3.523411 | 2.685312  | 1.030096 |
| 93  | 6 | 0 | 3.029534 | 3.993363  | 1.413139 |
| 94  | 6 | 0 | 4.226939 | 4.900055  | 1.607867 |
| 95  | 1 | 0 | 2.440196 | 3.891130  | 2.325683 |
| 96  | 1 | 0 | 2.365614 | 4.358023  | 0.624442 |
| 97  | 1 | 0 | 3.888588 | 5.899277  | 1.893197 |
| 98  | 1 | 0 | 4.812091 | 4.987884  | 0.690315 |
| 99  | 1 | 0 | 4.877483 | 4.521235  | 2.398804 |
| 100 | 7 | 0 | 1.501055 | -1.490136 | 0.912359 |
| 101 | 1 | 0 | 5.177891 | 1.151436  | 0.597993 |

### 3-1-IM1-endo

Energy + zep (gas) = -2188.39214 au

Gibbs free energy (gas) = -2188.47645 au

Gibbs free energy (in solvent) = -2187.70242 au

Zero-point correction = 0.85144 au

Thermal correction to Gibbs free energy = 0.76713 au

Standard orientation:

| Center<br>Number | Atomic<br>Number | Atomic<br>Type | Coordinates (Angstroms) |           |           |
|------------------|------------------|----------------|-------------------------|-----------|-----------|
|                  |                  |                | X                       | Y         | Z         |
| 1                | 6                | 0              | 5.286993                | -0.966084 | -0.255755 |
| 2                | 6                | 0              | 5.025092                | -1.604147 | -1.473438 |
| 3                | 6                | 0              | 6.272107                | -1.506576 | 0.577017  |
| 4                | 6                | 0              | 5.725527                | -2.749729 | -1.844275 |
| 5                | 6                | 0              | 6.703937                | -3.277215 | -1.004966 |
| 6                | 6                | 0              | 6.975196                | -2.651217 | 0.208991  |
| 7                | 1                | 0              | 5.508504                | -3.228379 | -2.792640 |
| 8                | 1                | 0              | 4.266608                | -1.214634 | -2.143425 |
| 9                | 1                | 0              | 7.252570                | -4.165338 | -1.296485 |
| 10               | 1                | 0              | 7.737318                | -3.050170 | 0.868838  |
| 11               | 1                | 0              | 6.491598                | -1.025617 | 1.524680  |
| 12               | 6                | 0              | 2.490577                | 0.692365  | 1.705970  |
| 13               | 8                | 0              | 1.310760                | 0.563402  | 2.070077  |

|    |   |   |           |           |           |
|----|---|---|-----------|-----------|-----------|
| 14 | 6 | 0 | 3.102145  | 0.041150  | 0.581529  |
| 15 | 6 | 0 | 4.540724  | 0.287298  | 0.184947  |
| 16 | 6 | 0 | 2.261727  | -0.865465 | -0.052488 |
| 17 | 8 | 0 | 3.339933  | 1.515140  | 2.377467  |
| 18 | 6 | 0 | 2.821771  | 2.178336  | 3.552367  |
| 19 | 6 | 0 | 3.983873  | 2.853888  | 4.252380  |
| 20 | 1 | 0 | 2.337762  | 1.438024  | 4.192202  |
| 21 | 1 | 0 | 2.061235  | 2.901486  | 3.244615  |
| 22 | 1 | 0 | 3.628443  | 3.359308  | 5.153900  |
| 23 | 1 | 0 | 4.455367  | 3.599622  | 3.608899  |
| 24 | 1 | 0 | 4.739391  | 2.122357  | 4.546315  |
| 25 | 7 | 0 | 1.464688  | -1.567032 | -0.544000 |
| 26 | 1 | 0 | 5.038742  | 0.658501  | 1.080145  |
| 27 | 1 | 0 | -0.086300 | -2.041418 | 0.135872  |
| 28 | 7 | 0 | -0.838608 | -2.280903 | 0.831437  |
| 29 | 6 | 0 | -2.007841 | -1.301903 | 0.757715  |
| 30 | 6 | 0 | -0.149247 | -2.267179 | 2.184636  |
| 31 | 6 | 0 | -1.364569 | -3.664815 | 0.550297  |
| 32 | 6 | 0 | -1.532720 | 0.146272  | 0.449990  |
| 33 | 6 | 0 | -2.846720 | -1.506776 | 2.036984  |
| 34 | 6 | 0 | -1.116707 | -2.815143 | 3.252165  |
| 35 | 6 | 0 | -2.517443 | -3.998702 | 1.547606  |
| 36 | 6 | 0 | -2.469042 | 1.236483  | 0.966273  |
| 37 | 6 | 0 | -2.524779 | -2.890357 | 2.638131  |
| 38 | 6 | 0 | -3.800031 | 1.443037  | 0.483180  |
| 39 | 6 | 0 | -1.992552 | 2.075432  | 1.948393  |
| 40 | 6 | 0 | -4.531524 | 2.535204  | 1.058753  |
| 41 | 6 | 0 | -2.808605 | 3.117746  | 2.449898  |
| 42 | 7 | 0 | -4.027264 | 3.350146  | 2.024833  |
| 43 | 1 | 0 | 0.184838  | -1.246494 | 2.366134  |
| 44 | 1 | 0 | 0.745147  | -2.877358 | 2.062669  |
| 45 | 1 | 0 | -0.521825 | -4.348837 | 0.648039  |
| 46 | 1 | 0 | -1.698947 | -3.687008 | -0.487499 |
| 47 | 1 | 0 | -0.567851 | 0.301166  | 0.942162  |
| 48 | 1 | 0 | -3.903138 | -1.402287 | 1.789304  |
| 49 | 1 | 0 | -2.619372 | -0.733264 | 2.773820  |
| 50 | 1 | 0 | -0.799405 | -3.802101 | 3.597309  |
| 51 | 1 | 0 | -1.116176 | -2.154925 | 4.121637  |
| 52 | 1 | 0 | -2.267243 | -4.940070 | 2.043635  |
| 53 | 1 | 0 | -3.262078 | -3.144772 | 3.400306  |
| 54 | 6 | 0 | -4.438836 | 0.653424  | -0.498087 |
| 55 | 1 | 0 | -0.988141 | 1.943511  | 2.337985  |
| 56 | 6 | 0 | -5.852046 | 2.784839  | 0.612723  |
| 57 | 1 | 0 | -2.426027 | 3.776764  | 3.224695  |

|     |   |   |           |           |           |
|-----|---|---|-----------|-----------|-----------|
| 58  | 7 | 0 | -1.272906 | 0.245542  | -0.998413 |
| 59  | 1 | 0 | -1.915683 | -0.224027 | -1.620799 |
| 60  | 6 | 0 | -4.570571 | -5.298444 | 0.928431  |
| 61  | 1 | 0 | -5.525099 | -5.385600 | 0.423224  |
| 62  | 6 | 0 | -3.845388 | -4.186562 | 0.859448  |
| 63  | 1 | 0 | -4.225660 | -3.349195 | 0.276140  |
| 64  | 1 | 0 | -4.237967 | -6.163127 | 1.494514  |
| 65  | 1 | 0 | -2.589551 | -1.654330 | -0.096762 |
| 66  | 6 | 0 | 1.879331  | 1.993964  | -1.190347 |
| 67  | 6 | 0 | 0.541010  | 1.826655  | -0.897454 |
| 68  | 6 | 0 | -0.247772 | 0.882671  | -1.587891 |
| 69  | 1 | 0 | 2.292934  | 1.350318  | -1.958386 |
| 70  | 1 | 0 | 0.127468  | 2.305279  | -0.018410 |
| 71  | 6 | 0 | 2.766771  | 2.932205  | -0.587288 |
| 72  | 6 | 0 | 4.113439  | 2.732651  | -0.513271 |
| 73  | 6 | 0 | 4.727743  | 1.433409  | -0.915909 |
| 74  | 6 | 0 | -0.035551 | 0.576987  | -3.019115 |
| 75  | 6 | 0 | -0.088176 | -0.745300 | -3.490518 |
| 76  | 6 | 0 | 0.181176  | 1.621127  | -3.932170 |
| 77  | 6 | 0 | 0.072135  | -1.012854 | -4.844295 |
| 78  | 1 | 0 | -0.177127 | -1.560148 | -2.783210 |
| 79  | 6 | 0 | 0.329883  | 1.346999  | -5.287817 |
| 80  | 1 | 0 | 0.203506  | 2.644125  | -3.578341 |
| 81  | 6 | 0 | 0.274877  | 0.032442  | -5.745839 |
| 82  | 1 | 0 | 0.055999  | -2.037454 | -5.196468 |
| 83  | 1 | 0 | 0.483167  | 2.160667  | -5.986522 |
| 84  | 1 | 0 | 0.396503  | -0.179168 | -6.801668 |
| 85  | 6 | 0 | 5.013009  | 3.745009  | 0.126269  |
| 86  | 1 | 0 | 4.465565  | 4.617645  | 0.484942  |
| 87  | 1 | 0 | 5.552566  | 3.298456  | 0.968446  |
| 88  | 1 | 0 | 2.334564  | 3.805305  | -0.105652 |
| 89  | 1 | 0 | 5.772921  | 4.082146  | -0.587634 |
| 90  | 1 | 0 | 4.304072  | 1.061506  | -1.851425 |
| 91  | 1 | 0 | 5.802506  | 1.549876  | -1.071650 |
| 92  | 6 | 0 | -6.448387 | 2.004294  | -0.345646 |
| 93  | 6 | 0 | -5.734155 | 0.916889  | -0.909012 |
| 94  | 8 | 0 | -6.239110 | 0.082848  | -1.851149 |
| 95  | 6 | 0 | -7.566096 | 0.296473  | -2.336904 |
| 96  | 1 | 0 | -7.735052 | -0.484401 | -3.075190 |
| 97  | 1 | 0 | -8.303812 | 0.201944  | -1.534539 |
| 98  | 1 | 0 | -7.459040 | 2.222620  | -0.661766 |
| 99  | 1 | 0 | -6.376401 | 3.618183  | 1.063345  |
| 100 | 1 | 0 | -3.951762 | -0.191593 | -0.966085 |
| 101 | 1 | 0 | -7.661381 | 1.274822  | -2.817013 |



-----  
**3-1-TS2-endo**

Energy + zep (gas) = -2188.38627 au

Gibbs free energy (gas) = -2188.47045 au

Gibbs free energy (in solvent) = -2187.70002 au

Zero-point correction = 0.85162 au

Thermal correction to Gibbs free energy = 0.76744 au

Standard orientation:

-----

| Center<br>Number | Atomic<br>Number | Atomic<br>Type | Coordinates (Angstroms) |           |           |
|------------------|------------------|----------------|-------------------------|-----------|-----------|
|                  |                  |                | X                       | Y         | Z         |
| 1                | 6                | 0              | 5.183551                | 1.076927  | 0.259774  |
| 2                | 6                | 0              | 4.889308                | 1.703115  | 1.476657  |
| 3                | 6                | 0              | 6.072705                | 1.710527  | -0.614217 |
| 4                | 6                | 0              | 5.466211                | 2.926532  | 1.807423  |
| 5                | 6                | 0              | 6.351564                | 3.545541  | 0.927831  |
| 6                | 6                | 0              | 6.653369                | 2.933444  | -0.285744 |
| 7                | 1                | 0              | 5.226809                | 3.394109  | 2.755706  |
| 8                | 1                | 0              | 4.204474                | 1.241391  | 2.179728  |
| 9                | 1                | 0              | 6.805429                | 4.494573  | 1.188527  |
| 10               | 1                | 0              | 7.344956                | 3.403607  | -0.975543 |
| 11               | 1                | 0              | 6.319357                | 1.238726  | -1.559901 |
| 12               | 6                | 0              | 2.602220                | -0.852568 | -1.707391 |
| 13               | 8                | 0              | 1.475511                | -0.704016 | -2.166447 |
| 14               | 6                | 0              | 3.088774                | -0.222421 | -0.459431 |
| 15               | 6                | 0              | 4.586311                | -0.270570 | -0.126294 |
| 16               | 6                | 0              | 2.308584                | 0.917695  | -0.150835 |
| 17               | 8                | 0              | 3.509810                | -1.665357 | -2.271339 |
| 18               | 6                | 0              | 3.101528                | -2.381180 | -3.468534 |
| 19               | 6                | 0              | 4.315707                | -3.109583 | -4.004023 |
| 20               | 1                | 0              | 2.704015                | -1.659669 | -4.184420 |
| 21               | 1                | 0              | 2.296775                | -3.069403 | -3.200048 |
| 22               | 1                | 0              | 4.043614                | -3.659821 | -4.908077 |
| 23               | 1                | 0              | 4.700919                | -3.823856 | -3.273637 |
| 24               | 1                | 0              | 5.112369                | -2.407831 | -4.259030 |
| 25               | 7                | 0              | 1.544736                | 1.755676  | 0.096762  |
| 26               | 1                | 0              | 5.082144                | -0.587008 | -1.042791 |
| 27               | 1                | 0              | -0.254078               | 1.946083  | -0.439429 |
| 28               | 7                | 0              | -1.017162               | 2.103131  | -1.129045 |
| 29               | 6                | 0              | -2.181536               | 1.136400  | -0.906767 |
| 30               | 6                | 0              | -0.380669               | 1.943343  | -2.496985 |
| 31               | 6                | 0              | -1.533242               | 3.512309  | -0.976549 |

|    |   |   |           |           |           |
|----|---|---|-----------|-----------|-----------|
| 32 | 6 | 0 | -1.661351 | -0.263951 | -0.477826 |
| 33 | 6 | 0 | -3.072139 | 1.210588  | -2.162919 |
| 34 | 6 | 0 | -1.391572 | 2.375831  | -3.577983 |
| 35 | 6 | 0 | -2.726083 | 3.738427  | -1.955417 |
| 36 | 6 | 0 | -2.618258 | -1.411219 | -0.795803 |
| 37 | 6 | 0 | -2.775649 | 2.520119  | -2.921506 |
| 38 | 6 | 0 | -3.910045 | -1.559303 | -0.196510 |
| 39 | 6 | 0 | -2.206540 | -2.371345 | -1.691992 |
| 40 | 6 | 0 | -4.668266 | -2.717885 | -0.573024 |
| 41 | 6 | 0 | -3.042402 | -3.471708 | -1.997034 |
| 42 | 7 | 0 | -4.225769 | -3.649257 | -1.461176 |
| 43 | 1 | 0 | -0.052895 | 0.909847  | -2.583822 |
| 44 | 1 | 0 | 0.518257  | 2.558043  | -2.477918 |
| 45 | 1 | 0 | -0.696175 | 4.180061  | -1.179443 |
| 46 | 1 | 0 | -1.825519 | 3.642246  | 0.065775  |
| 47 | 1 | 0 | -0.748007 | -0.460450 | -1.042405 |
| 48 | 1 | 0 | -4.117283 | 1.140643  | -1.860644 |
| 49 | 1 | 0 | -2.880770 | 0.359789  | -2.821095 |
| 50 | 1 | 0 | -1.087892 | 3.318974  | -4.038427 |
| 51 | 1 | 0 | -1.423775 | 1.626639  | -4.371263 |
| 52 | 1 | 0 | -2.499024 | 4.621161  | -2.558827 |
| 53 | 1 | 0 | -3.540923 | 2.695577  | -3.678311 |
| 54 | 6 | 0 | -4.485075 | -0.654512 | 0.723955  |
| 55 | 1 | 0 | -1.234590 | -2.295975 | -2.168744 |
| 56 | 6 | 0 | -5.949369 | -2.913163 | -0.002579 |
| 57 | 1 | 0 | -2.707086 | -4.224364 | -2.705689 |
| 58 | 7 | 0 | -1.257119 | -0.196855 | 0.927676  |
| 59 | 1 | 0 | -1.975158 | 0.027090  | 1.601540  |
| 60 | 6 | 0 | -4.761155 | 5.094194  | -1.401895 |
| 61 | 1 | 0 | -5.694220 | 5.236123  | -0.869777 |
| 62 | 6 | 0 | -4.025191 | 3.999798  | -1.236518 |
| 63 | 1 | 0 | -4.372281 | 3.233538  | -0.545002 |
| 64 | 1 | 0 | -4.459367 | 5.888818  | -2.077384 |
| 65 | 1 | 0 | -2.717877 | 1.569327  | -0.062008 |
| 66 | 6 | 0 | 2.162458  | -1.585868 | 0.960713  |
| 67 | 6 | 0 | 0.753423  | -1.520001 | 0.741497  |
| 68 | 6 | 0 | -0.077927 | -0.677417 | 1.444371  |
| 69 | 1 | 0 | 2.526291  | -0.965733 | 1.772702  |
| 70 | 1 | 0 | 0.362839  | -2.026330 | -0.132568 |
| 71 | 6 | 0 | 2.966560  | -2.760629 | 0.674095  |
| 72 | 6 | 0 | 4.314335  | -2.695979 | 0.703083  |
| 73 | 6 | 0 | 4.956057  | -1.364595 | 0.954443  |
| 74 | 6 | 0 | 0.203983  | -0.233528 | 2.833926  |
| 75 | 6 | 0 | 0.005042  | 1.098137  | 3.229340  |

|     |   |   |           |           |           |
|-----|---|---|-----------|-----------|-----------|
| 76  | 6 | 0 | 0.633099  | -1.165480 | 3.791007  |
| 77  | 6 | 0 | 0.241401  | 1.488105  | 4.542708  |
| 78  | 1 | 0 | -0.289337 | 1.835450  | 2.492977  |
| 79  | 6 | 0 | 0.864816  | -0.772993 | 5.105988  |
| 80  | 1 | 0 | 0.757664  | -2.201989 | 3.502511  |
| 81  | 6 | 0 | 0.669923  | 0.553336  | 5.484762  |
| 82  | 1 | 0 | 0.102170  | 2.523561  | 4.830990  |
| 83  | 1 | 0 | 1.186704  | -1.505637 | 5.836661  |
| 84  | 1 | 0 | 0.849839  | 0.858398  | 6.508995  |
| 85  | 6 | 0 | 5.193914  | -3.871285 | 0.402691  |
| 86  | 1 | 0 | 4.615027  | -4.772628 | 0.194071  |
| 87  | 1 | 0 | 5.836113  | -3.661365 | -0.460362 |
| 88  | 1 | 0 | 2.458940  | -3.675530 | 0.382925  |
| 89  | 1 | 0 | 5.863346  | -4.080171 | 1.244349  |
| 90  | 1 | 0 | 4.656367  | -0.982276 | 1.935361  |
| 91  | 1 | 0 | 6.044296  | -1.448539 | 0.973366  |
| 92  | 6 | 0 | -6.482901 | -2.021069 | 0.893337  |
| 93  | 6 | 0 | -5.742453 | -0.869891 | 1.261854  |
| 94  | 8 | 0 | -6.186752 | 0.072437  | 2.129525  |
| 95  | 6 | 0 | -7.466839 | -0.090229 | 2.743486  |
| 96  | 1 | 0 | -6.494650 | -3.798411 | -0.305043 |
| 97  | 1 | 0 | -3.977715 | 0.245460  | 1.045600  |
| 98  | 1 | 0 | -7.464338 | -2.201966 | 1.309654  |
| 99  | 1 | 0 | -8.267708 | -0.099337 | 1.998108  |
| 100 | 1 | 0 | -7.506763 | -1.003631 | 3.344167  |
| 101 | 1 | 0 | -7.589750 | 0.773346  | 3.393476  |

-----

**3-1-IM2- endo**

Energy + zep (gas) = -2188.39965 au

Gibbs free energy (gas) = -2188.48564 au

Gibbs free energy (in solvent) = -2187.72665 au

Zero-point correction = 0.85357 au

Thermal correction to Gibbs free energy = 0.76759 au

Standard orientation:

-----

| Center<br>Number | Atomic<br>Number | Atomic<br>Type | Coordinates (Angstroms) |          |          |
|------------------|------------------|----------------|-------------------------|----------|----------|
|                  |                  |                | X                       | Y        | Z        |
| 1                | 6                | 0              | -4.874340               | 0.931770 | 1.062114 |
| 2                | 6                | 0              | -4.875753               | 2.226023 | 0.526724 |
| 3                | 6                | 0              | -5.076476               | 0.784636 | 2.439256 |
| 4                | 6                | 0              | -5.058787               | 3.336963 | 1.347013 |

|    |   |   |           |           |           |
|----|---|---|-----------|-----------|-----------|
| 5  | 6 | 0 | -5.252201 | 3.174603  | 2.716428  |
| 6  | 6 | 0 | -5.263735 | 1.892943  | 3.260828  |
| 7  | 1 | 0 | -5.058536 | 4.329718  | 0.912093  |
| 8  | 1 | 0 | -4.751261 | 2.375244  | -0.539962 |
| 9  | 1 | 0 | -5.403945 | 4.039042  | 3.352290  |
| 10 | 1 | 0 | -5.427978 | 1.753762  | 4.323188  |
| 11 | 1 | 0 | -5.097891 | -0.209590 | 2.873861  |
| 12 | 6 | 0 | -2.944694 | -2.123088 | -0.531775 |
| 13 | 8 | 0 | -1.849298 | -2.637925 | -0.584958 |
| 14 | 6 | 0 | -3.172827 | -0.672594 | -0.012431 |
| 15 | 6 | 0 | -4.690798 | -0.311080 | 0.197577  |
| 16 | 6 | 0 | -2.403571 | -0.604595 | 1.236394  |
| 17 | 8 | 0 | -4.064862 | -2.738457 | -0.889171 |
| 18 | 6 | 0 | -3.931728 | -4.099008 | -1.409539 |
| 19 | 6 | 0 | -5.321881 | -4.616398 | -1.704782 |
| 20 | 1 | 0 | -3.415584 | -4.698307 | -0.657724 |
| 21 | 1 | 0 | -3.304367 | -4.055490 | -2.301511 |
| 22 | 1 | 0 | -5.253731 | -5.637377 | -2.088063 |
| 23 | 1 | 0 | -5.820526 | -4.004229 | -2.458560 |
| 24 | 1 | 0 | -5.936667 | -4.632459 | -0.802688 |
| 25 | 7 | 0 | -1.700303 | -0.573719 | 2.150810  |
| 26 | 1 | 0 | -5.127090 | -1.143105 | 0.753314  |
| 27 | 1 | 0 | 0.466880  | -0.718818 | 1.699898  |
| 28 | 7 | 0 | 1.220219  | -1.411490 | 1.806598  |
| 29 | 6 | 0 | 2.366660  | -1.104683 | 0.840354  |
| 30 | 6 | 0 | 0.611161  | -2.782089 | 1.579270  |
| 31 | 6 | 0 | 1.749810  | -1.325115 | 3.219241  |
| 32 | 6 | 0 | 1.808022  | -0.616865 | -0.523758 |
| 33 | 6 | 0 | 3.290830  | -2.336602 | 0.834971  |
| 34 | 6 | 0 | 1.657384  | -3.859747 | 1.930813  |
| 35 | 6 | 0 | 2.967340  | -2.286986 | 3.373427  |
| 36 | 6 | 0 | 2.829275  | -0.675858 | -1.655276 |
| 37 | 6 | 0 | 3.026923  | -3.178930 | 2.099708  |
| 38 | 6 | 0 | 4.034954  | 0.099092  | -1.674347 |
| 39 | 6 | 0 | 2.574313  | -1.497403 | -2.729657 |
| 40 | 6 | 0 | 4.884265  | -0.055066 | -2.821168 |
| 41 | 6 | 0 | 3.483879  | -1.570887 | -3.810645 |
| 42 | 7 | 0 | 4.598514  | -0.882804 | -3.862784 |
| 43 | 1 | 0 | 0.270897  | -2.823379 | 0.547551  |
| 44 | 1 | 0 | -0.276642 | -2.819649 | 2.207093  |
| 45 | 1 | 0 | 0.923828  | -1.581560 | 3.881826  |
| 46 | 1 | 0 | 2.020658  | -0.284676 | 3.398848  |
| 47 | 1 | 0 | 1.008345  | -1.300128 | -0.805029 |
| 48 | 1 | 0 | 4.326649  | -2.001249 | 0.777654  |

|    |   |   |           |           |           |
|----|---|---|-----------|-----------|-----------|
| 49 | 1 | 0 | 3.111983  | -2.949302 | -0.052504 |
| 50 | 1 | 0 | 1.376741  | -4.384962 | 2.846785  |
| 51 | 1 | 0 | 1.699074  | -4.604123 | 1.133464  |
| 52 | 1 | 0 | 2.765023  | -2.946321 | 4.221471  |
| 53 | 1 | 0 | 3.811119  | -3.926340 | 2.224174  |
| 54 | 6 | 0 | 4.441386  | 0.994280  | -0.657934 |
| 55 | 1 | 0 | 1.670012  | -2.095604 | -2.763384 |
| 56 | 6 | 0 | 6.088532  | 0.686535  | -2.887157 |
| 57 | 1 | 0 | 3.269982  | -2.223788 | -4.652638 |
| 58 | 7 | 0 | 1.214731  | 0.708707  | -0.337543 |
| 59 | 1 | 0 | 1.861393  | 1.476297  | -0.458701 |
| 60 | 6 | 0 | 5.010281  | -1.773125 | 4.731786  |
| 61 | 1 | 0 | 5.931906  | -1.227641 | 4.895824  |
| 62 | 6 | 0 | 4.251908  | -1.552338 | 3.662829  |
| 63 | 1 | 0 | 4.566373  | -0.800726 | 2.940562  |
| 64 | 1 | 0 | 4.738709  | -2.508781 | 5.482653  |
| 65 | 1 | 0 | 2.876243  | -0.264643 | 1.308468  |
| 66 | 6 | 0 | -2.515082 | 0.382520  | -1.013829 |
| 67 | 6 | 0 | -1.028589 | 0.193095  | -1.141805 |
| 68 | 6 | 0 | -0.118797 | 1.047404  | -0.628014 |
| 69 | 1 | 0 | -2.678875 | 1.342466  | -0.516709 |
| 70 | 1 | 0 | -0.708989 | -0.767074 | -1.523501 |
| 71 | 6 | 0 | -3.294440 | 0.360419  | -2.307630 |
| 72 | 6 | 0 | -4.606627 | 0.114619  | -2.379684 |
| 73 | 6 | 0 | -5.434204 | -0.227498 | -1.164943 |
| 74 | 6 | 0 | -0.425544 | 2.459067  | -0.249355 |
| 75 | 6 | 0 | -0.118446 | 2.953830  | 1.025341  |
| 76 | 6 | 0 | -0.984205 | 3.331014  | -1.193537 |
| 77 | 6 | 0 | -0.382223 | 4.279828  | 1.353724  |
| 78 | 1 | 0 | 0.308063  | 2.290632  | 1.768341  |
| 79 | 6 | 0 | -1.240356 | 4.659941  | -0.866570 |
| 80 | 1 | 0 | -1.199223 | 2.965412  | -2.190843 |
| 81 | 6 | 0 | -0.941922 | 5.136836  | 0.407838  |
| 82 | 1 | 0 | -0.154799 | 4.644276  | 2.348830  |
| 83 | 1 | 0 | -1.663402 | 5.324776  | -1.610788 |
| 84 | 1 | 0 | -1.140151 | 6.171626  | 0.661913  |
| 85 | 6 | 0 | -5.356452 | 0.144192  | -3.684360 |
| 86 | 1 | 0 | -4.700016 | 0.384980  | -4.522003 |
| 87 | 1 | 0 | -5.831152 | -0.822447 | -3.886568 |
| 88 | 1 | 0 | -2.736792 | 0.596501  | -3.208991 |
| 89 | 1 | 0 | -6.160665 | 0.887422  | -3.656045 |
| 90 | 1 | 0 | -6.241257 | 0.506497  | -1.068282 |
| 91 | 1 | 0 | -5.930315 | -1.181842 | -1.357756 |
| 92 | 6 | 0 | 6.461268  | 1.547251  | -1.885487 |

|     |   |   |          |          |           |
|-----|---|---|----------|----------|-----------|
| 93  | 6 | 0 | 5.626011 | 1.705311 | -0.751536 |
| 94  | 8 | 0 | 5.907230 | 2.527129 | 0.289339  |
| 95  | 6 | 0 | 7.090291 | 3.327194 | 0.249719  |
| 96  | 1 | 0 | 6.706091 | 0.546455 | -3.765473 |
| 97  | 1 | 0 | 3.847892 | 1.171221 | 0.228931  |
| 98  | 1 | 0 | 7.387306 | 2.099138 | -1.969684 |
| 99  | 1 | 0 | 7.990669 | 2.706355 | 0.216864  |
| 100 | 1 | 0 | 7.078883 | 4.011874 | -0.603416 |
| 101 | 1 | 0 | 7.083543 | 3.902616 | 1.172875  |

### 3-2-COM-exo

Energy + zep (gas) = -2188.40205 au

Gibbs free energy (gas) = -2188.49493 au

Gibbs free energy (in solvent) = -2187.70639 au

Zero-point correction = 0.84833 au

Thermal correction to Gibbs free energy = 0.75544 au

Standard orientation:

| Center<br>Number | Atomic<br>Number | Atomic<br>Type | Coordinates (Angstroms) |           |           |
|------------------|------------------|----------------|-------------------------|-----------|-----------|
|                  |                  |                | X                       | Y         | Z         |
| 1                | 1                | 0              | -0.404586               | -2.316079 | 0.378633  |
| 2                | 7                | 0              | -1.349993               | -2.494873 | 0.752275  |
| 3                | 6                | 0              | -2.386502               | -1.729760 | -0.065309 |
| 4                | 6                | 0              | -1.350860               | -2.088431 | 2.211725  |
| 5                | 6                | 0              | -1.640414               | -3.971240 | 0.640401  |
| 6                | 6                | 0              | -1.849812               | -0.340773 | -0.480351 |
| 7                | 6                | 0              | -3.717501               | -1.793199 | 0.712862  |
| 8                | 6                | 0              | -2.683013               | -2.521921 | 2.856808  |
| 9                | 6                | 0              | -3.104687               | -4.250233 | 1.098901  |
| 10               | 6                | 0              | -2.982609               | 0.506046  | -1.071571 |
| 11               | 6                | 0              | -3.652202               | -2.942978 | 1.739230  |
| 12               | 6                | 0              | -3.412334               | 0.275243  | -2.357997 |
| 13               | 6                | 0              | -3.638958               | 1.531575  | -0.318761 |
| 14               | 6                | 0              | -4.479270               | 1.025574  | -2.902547 |
| 15               | 6                | 0              | -4.711352               | 2.228684  | -0.970718 |
| 16               | 7                | 0              | -5.114853               | 1.964097  | -2.242074 |
| 17               | 1                | 0              | -1.181405               | -1.015715 | 2.247732  |
| 18               | 1                | 0              | -0.479202               | -2.565681 | 2.655740  |
| 19               | 1                | 0              | -0.901261               | -4.483865 | 1.254128  |
| 20               | 1                | 0              | -1.471358               | -4.254645 | -0.398486 |
| 21               | 1                | 0              | -1.447378               | 0.160829  | 0.399566  |
| 22               | 1                | 0              | -4.538071               | -1.926814 | 0.008210  |

|    |   |   |           |           |           |
|----|---|---|-----------|-----------|-----------|
| 23 | 1 | 0 | -3.907157 | -0.854083 | 1.236725  |
| 24 | 1 | 0 | -2.524416 | -3.347248 | 3.554890  |
| 25 | 1 | 0 | -3.100053 | -1.691275 | 3.428926  |
| 26 | 1 | 0 | -3.069440 | -5.005973 | 1.888123  |
| 27 | 1 | 0 | -4.644669 | -3.134584 | 2.148230  |
| 28 | 1 | 0 | -2.937158 | -0.471587 | -2.985243 |
| 29 | 6 | 0 | -3.300120 | 1.899955  | 1.003940  |
| 30 | 1 | 0 | -4.809257 | 0.833075  | -3.919975 |
| 31 | 6 | 0 | -5.391938 | 3.249572  | -0.264290 |
| 32 | 7 | 0 | -0.722948 | -0.584062 | -1.378779 |
| 33 | 1 | 0 | -0.988055 | -1.137772 | -2.186000 |
| 34 | 6 | 0 | -4.613032 | -5.954354 | 0.046846  |
| 35 | 1 | 0 | -5.229775 | -6.302540 | -0.773096 |
| 36 | 6 | 0 | -3.965375 | -4.795117 | -0.012327 |
| 37 | 1 | 0 | -4.056192 | -4.188497 | -0.911879 |
| 38 | 1 | 0 | -4.553612 | -6.597573 | 0.919545  |
| 39 | 1 | 0 | -2.484287 | -2.315448 | -0.983575 |
| 40 | 6 | 0 | 1.222308  | 2.673861  | -1.299161 |
| 41 | 6 | 0 | 0.209957  | 1.655753  | -1.142300 |
| 42 | 6 | 0 | 0.176863  | 0.446534  | -1.755668 |
| 43 | 1 | 0 | 2.077088  | 2.449500  | -1.928974 |
| 44 | 1 | 0 | -0.562588 | 1.888364  | -0.418012 |
| 45 | 6 | 0 | 1.159808  | 3.881944  | -0.699154 |
| 46 | 6 | 0 | 2.164209  | 4.950813  | -0.788138 |
| 47 | 6 | 0 | 3.468964  | 4.718236  | -0.997526 |
| 48 | 6 | 0 | 1.089936  | 0.027366  | -2.850723 |
| 49 | 6 | 0 | 1.674413  | -1.249832 | -2.851366 |
| 50 | 6 | 0 | 1.344516  | 0.876583  | -3.938555 |
| 51 | 6 | 0 | 2.505059  | -1.652613 | -3.893074 |
| 52 | 1 | 0 | 1.483470  | -1.920251 | -2.021525 |
| 53 | 6 | 0 | 2.176307  | 0.471523  | -4.978028 |
| 54 | 1 | 0 | 0.869925  | 1.849162  | -3.975311 |
| 55 | 6 | 0 | 2.762150  | -0.792581 | -4.958724 |
| 56 | 1 | 0 | 2.955835  | -2.638756 | -3.873359 |
| 57 | 1 | 0 | 2.357238  | 1.141171  | -5.810860 |
| 58 | 1 | 0 | 3.407367  | -1.107060 | -5.770695 |
| 59 | 6 | 0 | 1.634516  | 6.355476  | -0.610067 |
| 60 | 1 | 0 | 1.136571  | 6.462437  | 0.360117  |
| 61 | 1 | 0 | 2.432961  | 7.096584  | -0.665963 |
| 62 | 1 | 0 | 0.269002  | 4.119236  | -0.118914 |
| 63 | 1 | 0 | 0.889531  | 6.593542  | -1.376342 |
| 64 | 1 | 0 | 3.867233  | 3.713627  | -1.080286 |
| 65 | 1 | 0 | 4.177196  | 5.533692  | -1.088540 |
| 66 | 6 | 0 | -5.048547 | 3.585359  | 1.020808  |

|     |   |   |           |           |           |
|-----|---|---|-----------|-----------|-----------|
| 67  | 6 | 0 | -3.985093 | 2.904116  | 1.666246  |
| 68  | 8 | 0 | -3.573698 | 3.172451  | 2.930703  |
| 69  | 6 | 0 | -4.207533 | 4.220165  | 3.664397  |
| 70  | 1 | 0 | -6.196222 | 3.757533  | -0.781655 |
| 71  | 1 | 0 | -5.589145 | 4.370959  | 1.530548  |
| 72  | 1 | 0 | -2.486422 | 1.431318  | 1.542286  |
| 73  | 1 | 0 | -5.269009 | 4.009197  | 3.827307  |
| 74  | 1 | 0 | -3.696683 | 4.253710  | 4.624368  |
| 75  | 1 | 0 | -4.094434 | 5.184994  | 3.160715  |
| 76  | 6 | 0 | 2.623336  | -2.621492 | 0.780870  |
| 77  | 8 | 0 | 1.460084  | -2.975629 | 0.638089  |
| 78  | 6 | 0 | 3.010251  | -1.265778 | 1.250979  |
| 79  | 6 | 0 | 4.316845  | -0.881965 | 1.333537  |
| 80  | 6 | 0 | 1.897201  | -0.454909 | 1.613815  |
| 81  | 8 | 0 | 3.661816  | -3.411155 | 0.528033  |
| 82  | 6 | 0 | 4.928726  | 0.371061  | 1.716805  |
| 83  | 6 | 0 | 6.331002  | 0.368075  | 1.879137  |
| 84  | 6 | 0 | 4.230735  | 1.581315  | 1.913865  |
| 85  | 6 | 0 | 7.009572  | 1.519553  | 2.248717  |
| 86  | 6 | 0 | 6.302299  | 2.705391  | 2.443001  |
| 87  | 6 | 0 | 4.916940  | 2.733178  | 2.267355  |
| 88  | 1 | 0 | 8.084930  | 1.497891  | 2.377162  |
| 89  | 1 | 0 | 6.880658  | -0.552668 | 1.716750  |
| 90  | 1 | 0 | 6.829387  | 3.610343  | 2.722087  |
| 91  | 1 | 0 | 4.372342  | 3.660338  | 2.395877  |
| 92  | 1 | 0 | 3.160749  | 1.632034  | 1.771003  |
| 93  | 1 | 0 | 5.021442  | -1.662557 | 1.067319  |
| 94  | 6 | 0 | 3.386678  | -4.763968 | 0.055684  |
| 95  | 6 | 0 | 4.718206  | -5.435459 | -0.197610 |
| 96  | 1 | 0 | 2.779474  | -4.692243 | -0.848473 |
| 97  | 1 | 0 | 2.803484  | -5.278227 | 0.822034  |
| 98  | 1 | 0 | 4.549541  | -6.454734 | -0.553140 |
| 99  | 1 | 0 | 5.312184  | -5.487525 | 0.716729  |
| 100 | 1 | 0 | 5.289998  | -4.899147 | -0.957259 |
| 101 | 7 | 0 | 0.957898  | 0.147639  | 1.915208  |

---

### 3-2-TS1-exo

Energy + zep (gas) = -2188.37706 au

Gibbs free energy (gas) = -2188.46328 au

Gibbs free energy (in solvent) = -2187.68242 au

Zero-point correction = 0.84889 au

Thermal correction to Gibbs free energy = 0.76266 au

Standard orientation:



| Center<br>Number | Atomic<br>Number | Atomic<br>Type | Coordinates (Angstroms) |           |           |
|------------------|------------------|----------------|-------------------------|-----------|-----------|
|                  |                  |                | X                       | Y         | Z         |
| 1                | 1                | 0              | -0.625360               | -1.392730 | 1.445971  |
| 2                | 7                | 0              | -1.515869               | -1.153510 | 1.932175  |
| 3                | 6                | 0              | -2.662756               | -0.924182 | 0.947606  |
| 4                | 6                | 0              | -1.222253               | 0.078004  | 2.770792  |
| 5                | 6                | 0              | -1.903536               | -2.292861 | 2.842559  |
| 6                | 6                | 0              | -2.157613               | -0.297808 | -0.383563 |
| 7                | 6                | 0              | -3.786352               | -0.209636 | 1.725133  |
| 8                | 6                | 0              | -2.406923               | 0.351369  | 3.715342  |
| 9                | 6                | 0              | -3.278662               | -1.979197 | 3.511633  |
| 10               | 6                | 0              | -3.285609               | 0.403573  | -1.140122 |
| 11               | 6                | 0              | -3.604044               | -0.483247 | 3.233429  |
| 12               | 6                | 0              | -4.231757               | -0.341563 | -1.807134 |
| 13               | 6                | 0              | -3.408787               | 1.829470  | -1.162126 |
| 14               | 6                | 0              | -5.295301               | 0.294339  | -2.485978 |
| 15               | 6                | 0              | -4.532497               | 2.365905  | -1.880586 |
| 16               | 7                | 0              | -5.450430               | 1.596376  | -2.523667 |
| 17               | 1                | 0              | -1.018974               | 0.895571  | 2.084818  |
| 18               | 1                | 0              | -0.290340               | -0.131712 | 3.293641  |
| 19               | 1                | 0              | -1.102295               | -2.401623 | 3.573045  |
| 20               | 1                | 0              | -1.935880               | -3.199042 | 2.237384  |
| 21               | 1                | 0              | -1.368027               | 0.418009  | -0.158544 |
| 22               | 1                | 0              | -4.750177               | -0.565487 | 1.361474  |
| 23               | 1                | 0              | -3.762610               | 0.867857  | 1.547313  |
| 24               | 1                | 0              | -2.153183               | 0.096174  | 4.747171  |
| 25               | 1                | 0              | -2.647973               | 1.415738  | 3.696625  |
| 26               | 1                | 0              | -3.151967               | -2.084557 | 4.592237  |
| 27               | 1                | 0              | -4.509162               | -0.208296 | 3.775750  |
| 28               | 1                | 0              | -4.183597               | -1.425279 | -1.834092 |
| 29               | 6                | 0              | -2.512237               | 2.726636  | -0.535481 |
| 30               | 1                | 0              | -6.035863               | -0.303934 | -3.009997 |
| 31               | 6                | 0              | -4.704778               | 3.769813  | -1.930403 |
| 32               | 7                | 0              | -1.541555               | -1.379387 | -1.154126 |
| 33               | 1                | 0              | -2.138038               | -2.165020 | -1.370689 |
| 34               | 6                | 0              | -5.066578               | -3.685361 | 3.934217  |
| 35               | 1                | 0              | -5.849903               | -4.349065 | 3.588017  |
| 36               | 6                | 0              | -4.367449               | -2.932937 | 3.090417  |
| 37               | 1                | 0              | -4.591129               | -2.994428 | 2.026634  |
| 38               | 1                | 0              | -4.884708               | -3.662797 | 5.004346  |
| 39               | 1                | 0              | -3.004883               | -1.931821 | 0.701050  |
| 40               | 6                | 0              | 1.783759                | -0.168405 | -2.137614 |

|    |   |   |           |           |           |
|----|---|---|-----------|-----------|-----------|
| 41 | 6 | 0 | 0.379567  | -0.182828 | -1.989033 |
| 42 | 6 | 0 | -0.349068 | -1.344253 | -1.826440 |
| 43 | 1 | 0 | 2.295084  | -1.124077 | -2.088632 |
| 44 | 1 | 0 | -0.108348 | 0.769419  | -1.815814 |
| 45 | 6 | 0 | 2.549160  | 0.973731  | -2.277088 |
| 46 | 6 | 0 | 3.939241  | 1.046341  | -2.033653 |
| 47 | 6 | 0 | 4.632206  | 0.026442  | -1.372849 |
| 48 | 6 | 0 | 0.093453  | -2.659122 | -2.350716 |
| 49 | 6 | 0 | -0.081931 | -3.837186 | -1.605921 |
| 50 | 6 | 0 | 0.648632  | -2.752203 | -3.636342 |
| 51 | 6 | 0 | 0.292628  | -5.069639 | -2.130563 |
| 52 | 1 | 0 | -0.473880 | -3.778081 | -0.597690 |
| 53 | 6 | 0 | 1.023744  | -3.986650 | -4.157264 |
| 54 | 1 | 0 | 0.758305  | -1.855702 | -4.233436 |
| 55 | 6 | 0 | 0.845808  | -5.147810 | -3.408330 |
| 56 | 1 | 0 | 0.160236  | -5.969699 | -1.541111 |
| 57 | 1 | 0 | 1.442083  | -4.042588 | -5.155257 |
| 58 | 1 | 0 | 1.133020  | -6.108955 | -3.818194 |
| 59 | 6 | 0 | 4.660332  | 2.328930  | -2.355627 |
| 60 | 1 | 0 | 3.989650  | 3.190253  | -2.335644 |
| 61 | 1 | 0 | 5.486827  | 2.511350  | -1.667571 |
| 62 | 1 | 0 | 2.035956  | 1.905280  | -2.499911 |
| 63 | 1 | 0 | 5.081650  | 2.266666  | -3.366032 |
| 64 | 1 | 0 | 4.251894  | -0.986999 | -1.385599 |
| 65 | 1 | 0 | 5.711949  | 0.104696  | -1.307804 |
| 66 | 6 | 0 | -3.826537 | 4.621375  | -1.310296 |
| 67 | 6 | 0 | -2.713375 | 4.095651  | -0.605199 |
| 68 | 8 | 0 | -1.795442 | 4.864853  | 0.028434  |
| 69 | 6 | 0 | -1.918813 | 6.285570  | -0.017040 |
| 70 | 1 | 0 | -5.559597 | 4.144378  | -2.479417 |
| 71 | 1 | 0 | -3.986874 | 5.689194  | -1.367899 |
| 72 | 1 | 0 | -1.627640 | 2.395590  | -0.004890 |
| 73 | 1 | 0 | -2.847735 | 6.622746  | 0.453431  |
| 74 | 1 | 0 | -1.071591 | 6.668807  | 0.547705  |
| 75 | 1 | 0 | -1.866996 | 6.659179  | -1.044380 |
| 76 | 6 | 0 | 2.264462  | -1.436647 | 0.951402  |
| 77 | 8 | 0 | 1.091440  | -1.775430 | 1.164003  |
| 78 | 6 | 0 | 2.732382  | -0.070925 | 0.812342  |
| 79 | 6 | 0 | 4.116820  | 0.235468  | 0.668171  |
| 80 | 6 | 0 | 1.696954  | 0.886614  | 0.868559  |
| 81 | 8 | 0 | 3.242942  | -2.353716 | 0.830886  |
| 82 | 6 | 0 | 4.770098  | 1.499879  | 1.079841  |
| 83 | 6 | 0 | 6.109474  | 1.424994  | 1.500190  |
| 84 | 6 | 0 | 4.144746  | 2.756572  | 1.086409  |

|     |   |   |          |           |          |
|-----|---|---|----------|-----------|----------|
| 85  | 6 | 0 | 6.797778 | 2.556286  | 1.921725 |
| 86  | 6 | 0 | 6.161214 | 3.795970  | 1.928153 |
| 87  | 6 | 0 | 4.835478 | 3.888453  | 1.509149 |
| 88  | 1 | 0 | 7.827590 | 2.470026  | 2.248392 |
| 89  | 1 | 0 | 6.611700 | 0.462899  | 1.503459 |
| 90  | 1 | 0 | 6.693073 | 4.681048  | 2.257088 |
| 91  | 1 | 0 | 4.333083 | 4.848998  | 1.510935 |
| 92  | 1 | 0 | 3.117881 | 2.861788  | 0.765564 |
| 93  | 1 | 0 | 4.737938 | -0.627322 | 0.872481 |
| 94  | 6 | 0 | 2.897804 | -3.746503 | 1.044610 |
| 95  | 6 | 0 | 4.184270 | -4.544668 | 1.006771 |
| 96  | 1 | 0 | 2.203404 | -4.056772 | 0.261385 |
| 97  | 1 | 0 | 2.390448 | -3.835190 | 2.007567 |
| 98  | 1 | 0 | 3.964164 | -5.603726 | 1.162763 |
| 99  | 1 | 0 | 4.870587 | -4.219917 | 1.791315 |
| 100 | 1 | 0 | 4.683803 | -4.439605 | 0.041545 |
| 101 | 7 | 0 | 0.792988 | 1.614603  | 0.908818 |

-----

### 3-2-IM1-exo

Energy + zep (gas) = -2188.38941 au

Gibbs free energy (gas) = -2188.47395 au

Gibbs free energy (in solvent) = -2187.70145 au

Zero-point correction = 0.85153 au

Thermal correction to Gibbs free energy = 0.76699 au

Standard orientation:

| Center<br>Number | Atomic<br>Number | Atomic<br>Type | Coordinates (Angstroms) |           |           |
|------------------|------------------|----------------|-------------------------|-----------|-----------|
|                  |                  |                | X                       | Y         | Z         |
| 1                | 1                | 0              | -0.360015               | -1.278415 | 1.500535  |
| 2                | 7                | 0              | -1.280234               | -1.092289 | 1.990402  |
| 3                | 6                | 0              | -2.451958               | -1.011962 | 1.015684  |
| 4                | 6                | 0              | -1.105685               | 0.186590  | 2.789328  |
| 5                | 6                | 0              | -1.546852               | -2.232925 | 2.939884  |
| 6                | 6                | 0              | -2.050396               | -0.381068 | -0.352115 |
| 7                | 6                | 0              | -3.637867               | -0.389789 | 1.783167  |
| 8                | 6                | 0              | -2.305231               | 0.371284  | 3.737433  |
| 9                | 6                | 0              | -2.939023               | -2.040483 | 3.617538  |
| 10               | 6                | 0              | -3.252483               | 0.217284  | -1.081015 |
| 11               | 6                | 0              | -3.416316               | -0.594998 | 3.297063  |
| 12               | 6                | 0              | -4.170052               | -0.609426 | -1.690320 |
| 13               | 6                | 0              | -3.472792               | 1.630557  | -1.131744 |
| 14               | 6                | 0              | -5.301685               | -0.065816 | -2.338194 |

|    |   |   |           |           |           |
|----|---|---|-----------|-----------|-----------|
| 15 | 6 | 0 | -4.661729 | 2.068574  | -1.812118 |
| 16 | 7 | 0 | -5.548724 | 1.221216  | -2.397598 |
| 17 | 1 | 0 | -0.983237 | 0.998131  | 2.077709  |
| 18 | 1 | 0 | -0.155021 | 0.085398  | 3.311632  |
| 19 | 1 | 0 | -0.731764 | -2.236505 | 3.662944  |
| 20 | 1 | 0 | -1.488537 | -3.158192 | 2.366454  |
| 21 | 1 | 0 | -1.292743 | 0.384100  | -0.183677 |
| 22 | 1 | 0 | -4.563931 | -0.851847 | 1.441604  |
| 23 | 1 | 0 | -3.723852 | 0.678466  | 1.572372  |
| 24 | 1 | 0 | -2.020192 | 0.177533  | 4.774373  |
| 25 | 1 | 0 | -2.652974 | 1.404743  | 3.686744  |
| 26 | 1 | 0 | -2.792081 | -2.097922 | 4.699210  |
| 27 | 1 | 0 | -4.340745 | -0.394112 | 3.839455  |
| 28 | 1 | 0 | -4.049333 | -1.687779 | -1.693082 |
| 29 | 6 | 0 | -2.613161 | 2.601661  | -0.566926 |
| 30 | 1 | 0 | -6.019311 | -0.726631 | -2.816944 |
| 31 | 6 | 0 | -4.934278 | 3.455410  | -1.885471 |
| 32 | 7 | 0 | -1.412817 | -1.443818 | -1.147704 |
| 33 | 1 | 0 | -1.912178 | -2.320905 | -1.199754 |
| 34 | 6 | 0 | -4.525622 | -3.917918 | 4.114371  |
| 35 | 1 | 0 | -5.240156 | -4.669032 | 3.799294  |
| 36 | 6 | 0 | -3.930064 | -3.112075 | 3.240911  |
| 37 | 1 | 0 | -4.170503 | -3.218913 | 2.184125  |
| 38 | 1 | 0 | -4.323180 | -3.854334 | 5.179124  |
| 39 | 1 | 0 | -2.697305 | -2.057304 | 0.811636  |
| 40 | 6 | 0 | 1.781511  | -0.106318 | -2.208178 |
| 41 | 6 | 0 | 0.404936  | -0.180707 | -2.091167 |
| 42 | 6 | 0 | -0.260570 | -1.392133 | -1.837409 |
| 43 | 1 | 0 | 2.352402  | -1.020400 | -2.093991 |
| 44 | 1 | 0 | -0.155327 | 0.744350  | -2.019769 |
| 45 | 6 | 0 | 2.493540  | 1.095427  | -2.484336 |
| 46 | 6 | 0 | 3.793355  | 1.316555  | -2.131101 |
| 47 | 6 | 0 | 4.526582  | 0.373733  | -1.238941 |
| 48 | 6 | 0 | 0.232052  | -2.690882 | -2.347236 |
| 49 | 6 | 0 | 0.148305  | -3.853753 | -1.563077 |
| 50 | 6 | 0 | 0.737885  | -2.784984 | -3.653231 |
| 51 | 6 | 0 | 0.558914  | -5.078409 | -2.075760 |
| 52 | 1 | 0 | -0.178416 | -3.780733 | -0.532913 |
| 53 | 6 | 0 | 1.144417  | -4.014219 | -4.161945 |
| 54 | 1 | 0 | 0.781271  | -1.899319 | -4.274063 |
| 55 | 6 | 0 | 1.053957  | -5.161838 | -3.377379 |
| 56 | 1 | 0 | 0.505599  | -5.967118 | -1.457876 |
| 57 | 1 | 0 | 1.521578  | -4.076924 | -5.175596 |
| 58 | 1 | 0 | 1.369993  | -6.118369 | -3.776581 |

|     |   |   |           |           |           |
|-----|---|---|-----------|-----------|-----------|
| 59  | 6 | 0 | 4.500582  | 2.567552  | -2.556147 |
| 60  | 1 | 0 | 3.841258  | 3.257205  | -3.085198 |
| 61  | 1 | 0 | 4.943821  | 3.081092  | -1.698936 |
| 62  | 1 | 0 | 1.939497  | 1.900593  | -2.959725 |
| 63  | 1 | 0 | 5.329770  | 2.305314  | -3.224686 |
| 64  | 1 | 0 | 4.369472  | -0.664607 | -1.542790 |
| 65  | 1 | 0 | 5.599967  | 0.571289  | -1.278031 |
| 66  | 6 | 0 | -4.091229 | 4.380433  | -1.324919 |
| 67  | 6 | 0 | -2.913423 | 3.951424  | -0.659779 |
| 68  | 8 | 0 | -2.025333 | 4.798777  | -0.088227 |
| 69  | 6 | 0 | -2.252181 | 6.206022  | -0.157067 |
| 70  | 1 | 0 | -5.836213 | 3.756316  | -2.403510 |
| 71  | 1 | 0 | -4.328379 | 5.432831  | -1.398830 |
| 72  | 1 | 0 | -1.684355 | 2.344461  | -0.071743 |
| 73  | 1 | 0 | -3.180971 | 6.487352  | 0.348965  |
| 74  | 1 | 0 | -1.410048 | 6.661235  | 0.359656  |
| 75  | 1 | 0 | -2.273624 | 6.557521  | -1.193282 |
| 76  | 6 | 0 | 2.300853  | -1.335227 | 0.803647  |
| 77  | 8 | 0 | 1.145848  | -1.770421 | 1.039435  |
| 78  | 6 | 0 | 2.658324  | 0.015787  | 0.547132  |
| 79  | 6 | 0 | 4.093899  | 0.429858  | 0.305171  |
| 80  | 6 | 0 | 1.588468  | 0.914642  | 0.621412  |
| 81  | 8 | 0 | 3.342303  | -2.201647 | 0.741494  |
| 82  | 6 | 0 | 4.545557  | 1.719819  | 0.980008  |
| 83  | 6 | 0 | 5.691117  | 1.682221  | 1.784320  |
| 84  | 6 | 0 | 3.892884  | 2.948971  | 0.822753  |
| 85  | 6 | 0 | 6.173523  | 2.828233  | 2.411735  |
| 86  | 6 | 0 | 5.512945  | 4.042677  | 2.247542  |
| 87  | 6 | 0 | 4.370977  | 4.096912  | 1.452088  |
| 88  | 1 | 0 | 7.062179  | 2.769965  | 3.029974  |
| 89  | 1 | 0 | 6.212640  | 0.740446  | 1.924057  |
| 90  | 1 | 0 | 5.882724  | 4.937092  | 2.735429  |
| 91  | 1 | 0 | 3.846097  | 5.036422  | 1.319790  |
| 92  | 1 | 0 | 2.998961  | 3.020952  | 0.216578  |
| 93  | 1 | 0 | 4.698009  | -0.365514 | 0.740191  |
| 94  | 6 | 0 | 3.097483  | -3.584629 | 1.078937  |
| 95  | 6 | 0 | 4.435117  | -4.296785 | 1.073373  |
| 96  | 1 | 0 | 2.410780  | -4.012957 | 0.345291  |
| 97  | 1 | 0 | 2.618004  | -3.631242 | 2.059578  |
| 98  | 1 | 0 | 4.294677  | -5.351731 | 1.322445  |
| 99  | 1 | 0 | 5.113569  | -3.859505 | 1.808574  |
| 100 | 1 | 0 | 4.906214  | -4.237758 | 0.089935  |
| 101 | 7 | 0 | 0.646896  | 1.600591  | 0.655497  |

### 3-2-TS2-exo

Energy + zep (gas) = -2188.38345 au

Gibbs free energy (gas) = -2188.46754 au

Gibbs free energy (in solvent) = -2187.69889 au

Zero-point correction = 0.85164 au

Thermal correction to Gibbs free energy = 0.76755 au

Standard orientation:

| Center<br>Number | Atomic<br>Number | Atomic<br>Type | Coordinates (Angstroms) |           |           |
|------------------|------------------|----------------|-------------------------|-----------|-----------|
|                  |                  |                | X                       | Y         | Z         |
| 1                | 7                | 0              | -1.450615               | -1.370192 | -1.143795 |
| 2                | 1                | 0              | -2.037438               | -2.097146 | -1.527943 |
| 3                | 6                | 0              | 2.297157                | -1.375604 | 0.696265  |
| 4                | 8                | 0              | 1.171616                | -1.721303 | 1.065084  |
| 5                | 8                | 0              | 3.279767                | -2.268024 | 0.499834  |
| 6                | 6                | 0              | 3.002634                | -3.662050 | 0.802771  |
| 7                | 6                | 0              | 4.286633                | -4.436344 | 0.593581  |
| 8                | 1                | 0              | 2.205751                | -4.005961 | 0.141254  |
| 9                | 1                | 0              | 2.647613                | -3.726342 | 1.833499  |
| 10               | 1                | 0              | 4.115994                | -5.493927 | 0.809573  |
| 11               | 1                | 0              | 5.075770                | -4.076207 | 1.256483  |
| 12               | 1                | 0              | 4.632030                | -4.350488 | -0.438526 |
| 13               | 6                | 0              | 1.973841                | -0.062828 | -1.743444 |
| 14               | 6                | 0              | 0.548597                | -0.131599 | -1.681807 |
| 15               | 6                | 0              | -0.186927               | -1.291639 | -1.680209 |
| 16               | 1                | 0              | 2.505035                | -0.997643 | -1.886630 |
| 17               | 1                | 0              | 0.041504                | 0.802175  | -1.467633 |
| 18               | 6                | 0              | 2.627449                | 1.132621  | -2.251394 |
| 19               | 6                | 0              | 3.946040                | 1.367437  | -2.081742 |
| 20               | 6                | 0              | 4.724820                | 0.431907  | -1.211544 |
| 21               | 6                | 0              | 0.285644                | -2.564227 | -2.285474 |
| 22               | 6                | 0              | 0.024828                | -3.802842 | -1.677621 |
| 23               | 6                | 0              | 0.941703                | -2.550735 | -3.525954 |
| 24               | 6                | 0              | 0.421649                | -4.989945 | -2.284894 |
| 25               | 1                | 0              | -0.465410               | -3.832613 | -0.711814 |
| 26               | 6                | 0              | 1.338652                | -3.739428 | -4.130632 |
| 27               | 1                | 0              | 1.109866                | -1.605662 | -4.027037 |
| 28               | 6                | 0              | 1.081149                | -4.961494 | -3.512968 |
| 29               | 1                | 0              | 0.220138                | -5.937920 | -1.799298 |
| 30               | 1                | 0              | 1.835337                | -3.711382 | -5.093294 |
| 31               | 1                | 0              | 1.384893                | -5.886565 | -3.988579 |
| 32               | 6                | 0              | 4.638906                | 2.561102  | -2.668040 |

|    |   |   |           |           |           |
|----|---|---|-----------|-----------|-----------|
| 33 | 1 | 0 | 5.424190  | 2.238120  | -3.361144 |
| 34 | 1 | 0 | 3.948617  | 3.206854  | -3.213671 |
| 35 | 1 | 0 | 2.002893  | 1.863132  | -2.757532 |
| 36 | 1 | 0 | 5.133342  | 3.149725  | -1.889127 |
| 37 | 1 | 0 | 4.686004  | -0.585400 | -1.617107 |
| 38 | 1 | 0 | 5.776783  | 0.717985  | -1.162913 |
| 39 | 6 | 0 | 2.684898  | -0.009704 | 0.336366  |
| 40 | 6 | 0 | 4.176462  | 0.345710  | 0.269767  |
| 41 | 6 | 0 | 1.739796  | 0.949562  | 0.789393  |
| 42 | 7 | 0 | 0.898263  | 1.690028  | 1.083563  |
| 43 | 1 | 0 | 4.698305  | -0.510851 | 0.693703  |
| 44 | 6 | 0 | 4.595186  | 1.551053  | 1.104810  |
| 45 | 6 | 0 | 4.129054  | 2.850039  | 0.867480  |
| 46 | 6 | 0 | 5.518730  | 1.359298  | 2.138688  |
| 47 | 6 | 0 | 4.576937  | 3.919710  | 1.639026  |
| 48 | 6 | 0 | 5.498790  | 3.713510  | 2.662819  |
| 49 | 6 | 0 | 5.968534  | 2.427116  | 2.911889  |
| 50 | 1 | 0 | 4.200529  | 4.916831  | 1.440646  |
| 51 | 1 | 0 | 3.401703  | 3.034414  | 0.087044  |
| 52 | 1 | 0 | 5.846137  | 4.547681  | 3.261301  |
| 53 | 1 | 0 | 6.685694  | 2.252558  | 3.705881  |
| 54 | 1 | 0 | 5.895563  | 0.361224  | 2.339143  |
| 55 | 1 | 0 | -0.597307 | -1.504786 | 1.400918  |
| 56 | 7 | 0 | -1.470113 | -1.277266 | 1.915159  |
| 57 | 6 | 0 | -2.633698 | -1.027671 | 0.955394  |
| 58 | 6 | 0 | -1.151689 | -0.060457 | 2.766222  |
| 59 | 6 | 0 | -1.840648 | -2.431244 | 2.813722  |
| 60 | 6 | 0 | -2.142884 | -0.349869 | -0.352874 |
| 61 | 6 | 0 | -3.746284 | -0.334502 | 1.767863  |
| 62 | 6 | 0 | -2.320244 | 0.207517  | 3.732611  |
| 63 | 6 | 0 | -3.197317 | -2.122584 | 3.521079  |
| 64 | 6 | 0 | -3.295870 | 0.300989  | -1.113632 |
| 65 | 6 | 0 | -3.527456 | -0.623049 | 3.268220  |
| 66 | 6 | 0 | -3.449975 | 1.722075  | -1.183576 |
| 67 | 6 | 0 | -4.231818 | -0.487123 | -1.745648 |
| 68 | 6 | 0 | -4.582678 | 2.209652  | -1.922514 |
| 69 | 6 | 0 | -5.307767 | 0.102202  | -2.446523 |
| 70 | 7 | 0 | -5.484671 | 1.398949  | -2.536478 |
| 71 | 1 | 0 | -0.949940 | 0.767141  | 2.091559  |
| 72 | 1 | 0 | -0.213354 | -0.285495 | 3.270547  |
| 73 | 1 | 0 | -1.022833 | -2.557172 | 3.522938  |
| 74 | 1 | 0 | -1.893855 | -3.325740 | 2.192696  |
| 75 | 1 | 0 | -1.407859 | 0.407735  | -0.092646 |
| 76 | 1 | 0 | -4.715059 | -0.694808 | 1.422467  |

|     |   |   |           |           |           |
|-----|---|---|-----------|-----------|-----------|
| 77  | 1 | 0 | -3.736480 | 0.745383  | 1.601680  |
| 78  | 1 | 0 | -2.047686 | -0.054561 | 4.757798  |
| 79  | 1 | 0 | -2.560830 | 1.272075  | 3.725698  |
| 80  | 1 | 0 | -3.044234 | -2.240940 | 4.596872  |
| 81  | 1 | 0 | -4.419668 | -0.354706 | 3.834730  |
| 82  | 6 | 0 | -2.578444 | 2.659495  | -0.581986 |
| 83  | 1 | 0 | -4.168873 | -1.570832 | -1.725406 |
| 84  | 6 | 0 | -4.782873 | 3.607342  | -2.023038 |
| 85  | 1 | 0 | -6.038857 | -0.529109 | -2.944344 |
| 86  | 6 | 0 | -4.979657 | -3.829192 | 3.965190  |
| 87  | 1 | 0 | -5.771413 | -4.488092 | 3.629163  |
| 88  | 6 | 0 | -4.296948 | -3.070013 | 3.114066  |
| 89  | 1 | 0 | -4.542047 | -3.120971 | 2.054449  |
| 90  | 1 | 0 | -4.775214 | -3.817420 | 5.031407  |
| 91  | 1 | 0 | -2.970661 | -2.029339 | 0.679808  |
| 92  | 6 | 0 | -3.925703 | 4.498074  | -1.429176 |
| 93  | 6 | 0 | -2.806977 | 4.020867  | -0.698457 |
| 94  | 8 | 0 | -1.911249 | 4.828681  | -0.083605 |
| 95  | 6 | 0 | -2.068341 | 6.244765  | -0.167014 |
| 96  | 1 | 0 | -1.235790 | 6.662312  | 0.395030  |
| 97  | 1 | 0 | -3.009629 | 6.570554  | 0.286393  |
| 98  | 1 | 0 | -5.642915 | 3.944814  | -2.587704 |
| 99  | 1 | 0 | -4.107721 | 5.559715  | -1.524359 |
| 100 | 1 | 0 | -1.697244 | 2.366364  | -0.024678 |
| 101 | 1 | 0 | -2.015836 | 6.592412  | -1.203348 |

### 3-2-IM2-exo

Energy + zep (gas) = -2188.40936 au

Gibbs free energy (gas) = -2188.49491 au

Gibbs free energy (in solvent) = -2187.73648 au

Zero-point correction = 0.85333 au

Thermal correction to Gibbs free energy = 0.76779 au

Standard orientation:

| Center<br>Number | Atomic<br>Number | Atomic<br>Type | Coordinates (Angstroms) |          |           |
|------------------|------------------|----------------|-------------------------|----------|-----------|
|                  |                  |                | X                       | Y        | Z         |
| 1                | 7                | 0              | -1.457194               | 0.273104 | 1.502878  |
| 2                | 1                | 0              | -1.985412               | 0.237719 | 2.363551  |
| 3                | 6                | 0              | 2.733025                | 0.639024 | 0.146135  |
| 4                | 8                | 0              | 1.991820                | 1.545382 | -0.190109 |
| 5                | 8                | 0              | 3.607407                | 0.724136 | 1.132194  |
| 6                | 6                | 0              | 3.713760                | 2.000915 | 1.837478  |



|    |   |   |           |           |           |
|----|---|---|-----------|-----------|-----------|
| 7  | 6 | 0 | 4.775256  | 1.845887  | 2.903180  |
| 8  | 1 | 0 | 2.734675  | 2.230432  | 2.260633  |
| 9  | 1 | 0 | 3.967350  | 2.767002  | 1.103270  |
| 10 | 1 | 0 | 4.876384  | 2.785264  | 3.452294  |
| 11 | 1 | 0 | 5.742615  | 1.604555  | 2.459911  |
| 12 | 1 | 0 | 4.505050  | 1.062008  | 3.613033  |
| 13 | 6 | 0 | 1.722064  | -1.627660 | 0.477534  |
| 14 | 6 | 0 | 0.327541  | -1.053801 | 0.500058  |
| 15 | 6 | 0 | -0.271157 | -0.475852 | 1.563015  |
| 16 | 1 | 0 | 2.157206  | -1.531977 | 1.476014  |
| 17 | 1 | 0 | -0.183685 | -1.069887 | -0.456839 |
| 18 | 6 | 0 | 1.751928  | -3.082645 | 0.054819  |
| 19 | 6 | 0 | 2.712469  | -3.657271 | -0.673812 |
| 20 | 6 | 0 | 3.913077  | -2.883078 | -1.162578 |
| 21 | 6 | 0 | 0.281869  | -0.509353 | 2.951347  |
| 22 | 6 | 0 | 0.420504  | 0.672887  | 3.693463  |
| 23 | 6 | 0 | 0.623360  | -1.726128 | 3.556611  |
| 24 | 6 | 0 | 0.914339  | 0.640979  | 4.994847  |
| 25 | 1 | 0 | 0.141588  | 1.619757  | 3.245466  |
| 26 | 6 | 0 | 1.113339  | -1.756901 | 4.859445  |
| 27 | 1 | 0 | 0.485300  | -2.651368 | 3.010087  |
| 28 | 6 | 0 | 1.264476  | -0.574312 | 5.580469  |
| 29 | 1 | 0 | 1.021207  | 1.563561  | 5.553922  |
| 30 | 1 | 0 | 1.365976  | -2.707026 | 5.315371  |
| 31 | 1 | 0 | 1.641924  | -0.600332 | 6.595933  |
| 32 | 6 | 0 | 2.659821  | -5.106933 | -1.071659 |
| 33 | 1 | 0 | 3.518814  | -5.654311 | -0.668537 |
| 34 | 1 | 0 | 1.748320  | -5.591361 | -0.718085 |
| 35 | 1 | 0 | 0.903934  | -3.675126 | 0.385929  |
| 36 | 1 | 0 | 2.703366  | -5.211940 | -2.161318 |
| 37 | 1 | 0 | 4.823954  | -3.458967 | -0.965970 |
| 38 | 1 | 0 | 3.859592  | -2.790692 | -2.254109 |
| 39 | 6 | 0 | 2.687363  | -0.773185 | -0.457664 |
| 40 | 6 | 0 | 4.079609  | -1.496852 | -0.513089 |
| 41 | 6 | 0 | 2.090973  | -0.680860 | -1.793188 |
| 42 | 7 | 0 | 1.605867  | -0.635176 | -2.837960 |
| 43 | 1 | 0 | 4.344780  | -1.651081 | 0.535101  |
| 44 | 6 | 0 | 5.206884  | -0.693823 | -1.147987 |
| 45 | 6 | 0 | 5.198668  | -0.325445 | -2.499598 |
| 46 | 6 | 0 | 6.321171  | -0.349954 | -0.374111 |
| 47 | 6 | 0 | 6.267116  | 0.378474  | -3.051473 |
| 48 | 6 | 0 | 7.368182  | 0.716087  | -2.268350 |
| 49 | 6 | 0 | 7.394269  | 0.345263  | -0.926235 |
| 50 | 1 | 0 | 6.241819  | 0.653297  | -4.099799 |

|    |   |   |           |           |           |
|----|---|---|-----------|-----------|-----------|
| 51 | 1 | 0 | 4.362898  | -0.589457 | -3.135859 |
| 52 | 1 | 0 | 8.202071  | 1.255398  | -2.702371 |
| 53 | 1 | 0 | 8.251377  | 0.591739  | -0.309820 |
| 54 | 1 | 0 | 6.351028  | -0.637755 | 0.671413  |
| 55 | 7 | 0 | -0.756589 | 2.110722  | -0.867419 |
| 56 | 6 | 0 | -2.135788 | 1.891154  | -0.245014 |
| 57 | 6 | 0 | -0.667567 | 1.555468  | -2.276647 |
| 58 | 6 | 0 | -0.468281 | 3.595501  | -0.892711 |
| 59 | 6 | 0 | -2.309169 | 0.456007  | 0.320861  |
| 60 | 6 | 0 | -3.173546 | 2.349860  | -1.293986 |
| 61 | 6 | 0 | -1.582138 | 2.377114  | -3.205699 |
| 62 | 6 | 0 | -1.605872 | 4.338245  | -1.654554 |
| 63 | 6 | 0 | -3.767018 | 0.218616  | 0.704109  |
| 64 | 6 | 0 | -2.492605 | 3.258872  | -2.336531 |
| 65 | 6 | 0 | -4.538273 | -0.850212 | 0.147160  |
| 66 | 6 | 0 | -4.368369 | 1.038704  | 1.635538  |
| 67 | 6 | 0 | -5.894771 | -0.972615 | 0.606600  |
| 68 | 6 | 0 | -5.711578 | 0.821228  | 2.017483  |
| 69 | 7 | 0 | -6.454643 | -0.141072 | 1.524802  |
| 70 | 1 | 0 | -0.952438 | 0.507197  | -2.229246 |
| 71 | 1 | 0 | 0.381608  | 1.586331  | -2.556067 |
| 72 | 1 | 0 | 0.505205  | 3.713926  | -1.366440 |
| 73 | 1 | 0 | -0.381847 | 3.920738  | 0.143862  |
| 74 | 1 | 0 | -2.031457 | -0.262901 | -0.447831 |
| 75 | 1 | 0 | -3.991964 | 2.859147  | -0.786507 |
| 76 | 1 | 0 | -3.612866 | 1.486350  | -1.801345 |
| 77 | 1 | 0 | -0.987707 | 2.991818  | -3.885391 |
| 78 | 1 | 0 | -2.177723 | 1.702093  | -3.822727 |
| 79 | 1 | 0 | -1.143851 | 4.927788  | -2.450710 |
| 80 | 1 | 0 | -3.246383 | 3.752187  | -2.950983 |
| 81 | 6 | 0 | -4.062235 | -1.778505 | -0.804780 |
| 82 | 1 | 0 | -3.828240 | 1.861584  | 2.092635  |
| 83 | 6 | 0 | -6.701052 | -2.013111 | 0.085340  |
| 84 | 1 | 0 | -6.176254 | 1.473053  | 2.752412  |
| 85 | 6 | 0 | -2.498241 | 6.590691  | -1.009040 |
| 86 | 1 | 0 | -3.066846 | 7.235697  | -0.349821 |
| 87 | 6 | 0 | -2.371059 | 5.289297  | -0.770369 |
| 88 | 1 | 0 | -2.847528 | 4.869093  | 0.113902  |
| 89 | 1 | 0 | -2.040765 | 7.060131  | -1.874525 |
| 90 | 1 | 0 | -2.147170 | 2.564436  | 0.613261  |
| 91 | 1 | 0 | -0.010038 | 1.664029  | -0.315375 |
| 92 | 6 | 0 | -6.215449 | -2.901184 | -0.840328 |
| 93 | 6 | 0 | -4.875695 | -2.785954 | -1.293024 |
| 94 | 8 | 0 | -4.310878 | -3.618880 | -2.199794 |

|     |   |   |           |           |           |
|-----|---|---|-----------|-----------|-----------|
| 95  | 6 | 0 | -5.081396 | -4.692263 | -2.742297 |
| 96  | 1 | 0 | -5.403382 | -5.386663 | -1.960456 |
| 97  | 1 | 0 | -4.415757 | -5.208739 | -3.430395 |
| 98  | 1 | 0 | -6.857549 | -3.685297 | -1.217254 |
| 99  | 1 | 0 | -3.046830 | -1.752709 | -1.177207 |
| 100 | 1 | 0 | -7.718438 | -2.080547 | 0.449630  |
| 101 | 1 | 0 | -5.951644 | -4.320606 | -3.291666 |

### 3-3-COM-endo

Energy + zep (gas) = -2188.40796 au

Gibbs free energy (gas) = -2188.50338 au

Gibbs free energy (in solvent) = -2187.70960 au

Zero-point correction = 0.84823 au

Thermal correction to Gibbs free energy = 0.75281 au

Standard orientation:

| Center<br>Number | Atomic<br>Number | Atomic<br>Type | Coordinates (Angstroms) |           |           |
|------------------|------------------|----------------|-------------------------|-----------|-----------|
|                  |                  |                | X                       | Y         | Z         |
| 1                | 1                | 0              | -0.400742               | -1.911114 | -1.106212 |
| 2                | 7                | 0              | 0.361090                | -2.601507 | -1.004609 |
| 3                | 6                | 0              | 1.224987                | -2.147551 | 0.165876  |
| 4                | 6                | 0              | 1.129278                | -2.676720 | -2.300538 |
| 5                | 6                | 0              | -0.239456               | -3.946558 | -0.684472 |
| 6                | 6                | 0              | 1.549623                | -0.644059 | 0.058614  |
| 7                | 6                | 0              | 2.445879                | -3.093189 | 0.249284  |
| 8                | 6                | 0              | 2.254022                | -3.728440 | -2.158836 |
| 9                | 6                | 0              | 0.894855                | -4.991516 | -0.470343 |
| 10               | 6                | 0              | 2.300780                | -0.207762 | 1.319678  |
| 11               | 6                | 0              | 2.251348                | -4.275766 | -0.719259 |
| 12               | 6                | 0              | 1.636729                | -0.168407 | 2.526283  |
| 13               | 6                | 0              | 3.684803                | 0.158242  | 1.301510  |
| 14               | 6                | 0              | 2.319782                | 0.213258  | 3.702998  |
| 15               | 6                | 0              | 4.276367                | 0.522003  | 2.559276  |
| 16               | 7                | 0              | 3.589941                | 0.541417  | 3.733001  |
| 17               | 1                | 0              | 1.498447                | -1.677410 | -2.519482 |
| 18               | 1                | 0              | 0.402742                | -2.935300 | -3.070941 |
| 19               | 1                | 0              | -0.901425               | -4.204747 | -1.509980 |
| 20               | 1                | 0              | -0.853689               | -3.813125 | 0.205284  |
| 21               | 1                | 0              | 2.188273                | -0.478802 | -0.807889 |
| 22               | 1                | 0              | 2.576089                | -3.437105 | 1.275345  |
| 23               | 1                | 0              | 3.359827                | -2.557325 | -0.016396 |
| 24               | 1                | 0              | 2.105184                | -4.540667 | -2.873577 |

|    |   |   |           |           |           |
|----|---|---|-----------|-----------|-----------|
| 25 | 1 | 0 | 3.220333  | -3.274034 | -2.385737 |
| 26 | 1 | 0 | 0.793611  | -5.768699 | -1.232917 |
| 27 | 1 | 0 | 3.061734  | -4.994746 | -0.592549 |
| 28 | 1 | 0 | 0.582315  | -0.414833 | 2.597189  |
| 29 | 6 | 0 | 4.497264  | 0.183356  | 0.144685  |
| 30 | 1 | 0 | 1.786647  | 0.240055  | 4.650038  |
| 31 | 6 | 0 | 5.645545  | 0.880336  | 2.593423  |
| 32 | 7 | 0 | 0.297505  | 0.086335  | -0.201468 |
| 33 | 1 | 0 | -0.334657 | 0.039461  | 0.594264  |
| 34 | 6 | 0 | 6.414203  | 0.889909  | 1.456973  |
| 35 | 6 | 0 | 5.832289  | 0.539526  | 0.212139  |
| 36 | 1 | 0 | 6.062726  | 1.148390  | 3.556038  |
| 37 | 1 | 0 | 7.456819  | 1.169965  | 1.518631  |
| 38 | 8 | 0 | 6.511387  | 0.529439  | -0.963490 |
| 39 | 1 | 0 | 4.106823  | -0.048690 | -0.836870 |
| 40 | 6 | 0 | 7.888260  | 0.903793  | -0.977563 |
| 41 | 1 | 0 | 8.201283  | 0.825198  | -2.016628 |
| 42 | 1 | 0 | 8.026084  | 1.934326  | -0.635895 |
| 43 | 1 | 0 | 8.493496  | 0.227008  | -0.366356 |
| 44 | 6 | 0 | 0.698045  | -6.970248 | 1.058767  |
| 45 | 1 | 0 | 0.638143  | -7.403413 | 2.050085  |
| 46 | 6 | 0 | 0.796291  | -5.657206 | 0.877883  |
| 47 | 1 | 0 | 0.806954  | -5.002877 | 1.748176  |
| 48 | 1 | 0 | 0.676095  | -7.662152 | 0.222296  |
| 49 | 1 | 0 | 0.575971  | -2.284210 | 1.033630  |
| 50 | 6 | 0 | 0.398196  | 1.417029  | -0.695958 |
| 51 | 6 | 0 | -6.244720 | -0.483636 | -0.432826 |
| 52 | 6 | 0 | -5.952686 | -0.972145 | -1.723679 |
| 53 | 6 | 0 | -7.578395 | -0.131843 | -0.134681 |
| 54 | 6 | 0 | -6.960152 | -1.101997 | -2.666821 |
| 55 | 6 | 0 | -8.275401 | -0.753170 | -2.350605 |
| 56 | 6 | 0 | -8.583439 | -0.267552 | -1.081126 |
| 57 | 6 | 0 | -3.140165 | -0.267599 | 1.925012  |
| 58 | 8 | 0 | -1.936665 | -0.447411 | 1.987455  |
| 59 | 6 | 0 | -3.941579 | -0.574591 | 0.702849  |
| 60 | 6 | 0 | -5.274989 | -0.301626 | 0.625854  |
| 61 | 6 | 0 | -3.165296 | -1.171615 | -0.329335 |
| 62 | 8 | 0 | -3.875708 | 0.216034  | 2.921568  |
| 63 | 6 | 0 | -3.183909 | 0.557125  | 4.162507  |
| 64 | 6 | 0 | -4.221357 | 1.082122  | 5.129852  |
| 65 | 7 | 0 | -2.482368 | -1.664172 | -1.121767 |
| 66 | 6 | 0 | -0.302774 | 3.807829  | -0.483456 |
| 67 | 6 | 0 | -0.145411 | 2.451809  | -0.012170 |
| 68 | 6 | 0 | -0.824325 | 4.800880  | 0.265780  |

|     |   |   |           |           |           |
|-----|---|---|-----------|-----------|-----------|
| 69  | 6 | 0 | -1.001095 | 6.201868  | -0.140533 |
| 70  | 6 | 0 | -0.224156 | 6.800959  | -1.054060 |
| 71  | 6 | 0 | -2.110236 | 6.949544  | 0.563613  |
| 72  | 1 | 0 | -4.942325 | -1.243790 | -1.994548 |
| 73  | 1 | 0 | -7.816419 | 0.249342  | 0.852255  |
| 74  | 1 | 0 | -6.723670 | -1.474443 | -3.656304 |
| 75  | 1 | 0 | -9.056128 | -0.857904 | -3.094901 |
| 76  | 1 | 0 | -9.601752 | 0.006231  | -0.833524 |
| 77  | 1 | 0 | -5.680087 | 0.135202  | 1.532426  |
| 78  | 1 | 0 | -2.689708 | -0.343190 | 4.531765  |
| 79  | 1 | 0 | -2.418571 | 1.299913  | 3.931021  |
| 80  | 1 | 0 | -3.737221 | 1.346077  | 6.073056  |
| 81  | 1 | 0 | -4.709474 | 1.975552  | 4.735815  |
| 82  | 1 | 0 | -4.982818 | 0.327772  | 5.336899  |
| 83  | 1 | 0 | 0.003834  | 4.022570  | -1.502318 |
| 84  | 1 | 0 | -0.537606 | 2.240340  | 0.980698  |
| 85  | 1 | 0 | -1.176270 | 4.554867  | 1.267470  |
| 86  | 1 | 0 | 0.607123  | 6.289266  | -1.524809 |
| 87  | 1 | 0 | -0.391036 | 7.831418  | -1.345118 |
| 88  | 1 | 0 | -1.948355 | 6.952434  | 1.647385  |
| 89  | 1 | 0 | -3.080674 | 6.473382  | 0.387043  |
| 90  | 1 | 0 | -2.171429 | 7.985607  | 0.228321  |
| 91  | 6 | 0 | 1.045394  | 1.552299  | -2.029734 |
| 92  | 6 | 0 | 0.528202  | 0.863585  | -3.137932 |
| 93  | 6 | 0 | 2.169675  | 2.368034  | -2.211055 |
| 94  | 6 | 0 | 1.114031  | 0.996961  | -4.393927 |
| 95  | 6 | 0 | 2.760838  | 2.493223  | -3.467086 |
| 96  | 6 | 0 | 2.235576  | 1.809565  | -4.560863 |
| 97  | 1 | 0 | -0.362443 | 0.257267  | -3.012922 |
| 98  | 1 | 0 | 2.582786  | 2.897558  | -1.360582 |
| 99  | 1 | 0 | 0.687206  | 0.481136  | -5.247088 |
| 100 | 1 | 0 | 3.633181  | 3.124776  | -3.589240 |
| 101 | 1 | 0 | 2.691166  | 1.914083  | -5.538699 |

---

### 3-3-TS1-endo

Energy + zep (gas) = -2188.37099 au

Gibbs free energy (gas) = -2188.45732 au

Gibbs free energy (in solvent) = -2187.67487 au

Zero-point correction = 0.84884 au

Thermal correction to Gibbs free energy = 0.76251 au

Standard orientation:

---

| Center | Atomic | Atomic | Coordinates (Angstroms) |
|--------|--------|--------|-------------------------|
|--------|--------|--------|-------------------------|

| Number | Number | Type | X         | Y         | Z         |
|--------|--------|------|-----------|-----------|-----------|
| 1      | 1      | 0    | 0.161989  | 1.175641  | -0.406348 |
| 2      | 7      | 0    | -0.589615 | 1.550563  | -1.015024 |
| 3      | 6      | 0    | -1.909908 | 1.682779  | -0.261283 |
| 4      | 6      | 0    | -0.731502 | 0.700441  | -2.261015 |
| 5      | 6      | 0    | -0.094363 | 2.933853  | -1.397255 |
| 6      | 6      | 0    | -2.353637 | 0.384651  | 0.476060  |
| 7      | 6      | 0    | -2.967677 | 2.198596  | -1.272719 |
| 8      | 6      | 0    | -1.668133 | 1.420651  | -3.256418 |
| 9      | 6      | 0    | -1.144582 | 3.665416  | -2.275256 |
| 10     | 6      | 0    | -3.703508 | 0.633928  | 1.152023  |
| 11     | 6      | 0    | -2.282392 | 2.654777  | -2.572640 |
| 12     | 6      | 0    | -3.806780 | 1.589489  | 2.139192  |
| 13     | 6      | 0    | -4.876539 | -0.110518 | 0.810292  |
| 14     | 6      | 0    | -5.040543 | 1.816512  | 2.790311  |
| 15     | 6      | 0    | -6.076595 | 0.207965  | 1.534155  |
| 16     | 7      | 0    | -6.138385 | 1.158468  | 2.503829  |
| 17     | 1      | 0    | -1.115170 | -0.268178 | -1.948293 |
| 18     | 1      | 0    | 0.274964  | 0.538151  | -2.643127 |
| 19     | 1      | 0    | 0.853644  | 2.779864  | -1.909444 |
| 20     | 1      | 0    | 0.117745  | 3.453225  | -0.464322 |
| 21     | 1      | 0    | -2.458912 | -0.414258 | -0.252953 |
| 22     | 1      | 0    | -3.540833 | 3.005861  | -0.817666 |
| 23     | 1      | 0    | -3.682962 | 1.406152  | -1.506757 |
| 24     | 1      | 0    | -1.113877 | 1.718932  | -4.148968 |
| 25     | 1      | 0    | -2.457277 | 0.739717  | -3.581850 |
| 26     | 1      | 0    | -0.675113 | 3.915867  | -3.230258 |
| 27     | 1      | 0    | -3.016636 | 3.122958  | -3.229568 |
| 28     | 1      | 0    | -2.952835 | 2.187582  | 2.442982  |
| 29     | 6      | 0    | -4.932715 | -1.119909 | -0.176555 |
| 30     | 1      | 0    | -5.109088 | 2.570896  | 3.569451  |
| 31     | 6      | 0    | -7.265434 | -0.498906 | 1.231532  |
| 32     | 7      | 0    | -1.375959 | -0.063376 | 1.465738  |
| 33     | 1      | 0    | -1.213868 | 0.587421  | 2.222722  |
| 34     | 6      | 0    | -7.294021 | -1.475464 | 0.268598  |
| 35     | 6      | 0    | -6.110959 | -1.794099 | -0.446305 |
| 36     | 1      | 0    | -8.153347 | -0.236868 | 1.793035  |
| 37     | 1      | 0    | -8.218663 | -1.997075 | 0.063171  |
| 38     | 8      | 0    | -6.042654 | -2.747553 | -1.407440 |
| 39     | 1      | 0    | -4.062273 | -1.420633 | -0.743804 |
| 40     | 6      | 0    | -7.217944 | -3.484128 | -1.749180 |
| 41     | 1      | 0    | -6.911602 | -4.172919 | -2.533492 |
| 42     | 1      | 0    | -7.594632 | -4.053936 | -0.894359 |

|    |   |   |           |           |           |
|----|---|---|-----------|-----------|-----------|
| 43 | 1 | 0 | -8.003570 | -2.826296 | -2.132841 |
| 44 | 6 | 0 | -1.550478 | 6.140369  | -2.234504 |
| 45 | 1 | 0 | -1.911804 | 7.037096  | -1.745358 |
| 46 | 6 | 0 | -1.618014 | 4.950436  | -1.646278 |
| 47 | 1 | 0 | -2.039149 | 4.881011  | -0.644436 |
| 48 | 1 | 0 | -1.132132 | 6.262229  | -3.228933 |
| 49 | 1 | 0 | -1.705005 | 2.443757  | 0.494886  |
| 50 | 6 | 0 | -0.384239 | -1.001283 | 1.286929  |
| 51 | 6 | 0 | 6.004423  | -0.592782 | -0.849855 |
| 52 | 6 | 0 | 5.721217  | -1.385462 | -1.971990 |
| 53 | 6 | 0 | 7.321074  | -0.141893 | -0.667054 |
| 54 | 6 | 0 | 6.721182  | -1.696625 | -2.887239 |
| 55 | 6 | 0 | 8.021070  | -1.228742 | -2.701682 |
| 56 | 6 | 0 | 8.318352  | -0.448860 | -1.586691 |
| 57 | 6 | 0 | 2.968718  | 1.216023  | 0.695369  |
| 58 | 8 | 0 | 1.808220  | 1.600618  | 0.496438  |
| 59 | 6 | 0 | 3.683227  | 0.265474  | -0.131565 |
| 60 | 6 | 0 | 4.996523  | -0.206518 | 0.175027  |
| 61 | 6 | 0 | 2.983940  | -0.098516 | -1.299744 |
| 62 | 8 | 0 | 3.701045  | 1.697998  | 1.721817  |
| 63 | 6 | 0 | 3.097357  | 2.712224  | 2.557934  |
| 64 | 6 | 0 | 4.160330  | 3.206534  | 3.517421  |
| 65 | 7 | 0 | 2.366976  | -0.371408 | -2.245697 |
| 66 | 6 | 0 | 1.962035  | -1.599641 | 1.914852  |
| 67 | 6 | 0 | 0.749998  | -0.894371 | 2.060001  |
| 68 | 6 | 0 | 3.052209  | -1.359987 | 2.731527  |
| 69 | 6 | 0 | 4.395933  | -1.679696 | 2.446283  |
| 70 | 6 | 0 | 4.830762  | -2.017046 | 1.157316  |
| 71 | 6 | 0 | 5.423230  | -1.472382 | 3.529426  |
| 72 | 1 | 0 | 4.721861  | -1.765195 | -2.137773 |
| 73 | 1 | 0 | 7.560535  | 0.466303  | 0.199031  |
| 74 | 1 | 0 | 6.484041  | -2.309198 | -3.749399 |
| 75 | 1 | 0 | 8.796107  | -1.474200 | -3.418198 |
| 76 | 1 | 0 | 9.325775  | -0.080587 | -1.431371 |
| 77 | 1 | 0 | 5.440300  | 0.350958  | 0.989536  |
| 78 | 1 | 0 | 2.721192  | 3.515072  | 1.920728  |
| 79 | 1 | 0 | 2.245945  | 2.275021  | 3.087027  |
| 80 | 1 | 0 | 3.742570  | 3.981642  | 4.164664  |
| 81 | 1 | 0 | 4.529188  | 2.396546  | 4.149996  |
| 82 | 1 | 0 | 5.005280  | 3.633610  | 2.973957  |
| 83 | 1 | 0 | 2.050549  | -2.316604 | 1.106721  |
| 84 | 1 | 0 | 0.763216  | -0.076703 | 2.777258  |
| 85 | 1 | 0 | 2.871757  | -0.790556 | 3.640376  |
| 86 | 1 | 0 | 4.129470  | -2.433413 | 0.444452  |

|     |   |   |           |           |           |
|-----|---|---|-----------|-----------|-----------|
| 87  | 1 | 0 | 5.844427  | -2.384043 | 1.049679  |
| 88  | 1 | 0 | 6.415070  | -1.277561 | 3.117626  |
| 89  | 1 | 0 | 5.499081  | -2.376711 | 4.144093  |
| 90  | 1 | 0 | 5.150774  | -0.651870 | 4.197183  |
| 91  | 6 | 0 | -0.683984 | -2.143065 | 0.376670  |
| 92  | 6 | 0 | 0.102263  | -2.472245 | -0.734116 |
| 93  | 6 | 0 | -1.791898 | -2.948193 | 0.689844  |
| 94  | 6 | 0 | -0.213632 | -3.585831 | -1.511280 |
| 95  | 6 | 0 | -2.096307 | -4.062073 | -0.085048 |
| 96  | 6 | 0 | -1.307685 | -4.384202 | -1.188627 |
| 97  | 1 | 0 | 0.942782  | -1.853070 | -1.018987 |
| 98  | 1 | 0 | -2.400237 | -2.708453 | 1.554010  |
| 99  | 1 | 0 | 0.399593  | -3.821942 | -2.373075 |
| 100 | 1 | 0 | -2.949197 | -4.677803 | 0.174481  |
| 101 | 1 | 0 | -1.545918 | -5.251732 | -1.792708 |

### 3-3-IM1-endo

Energy + zep (gas) = -2188.38620 au

Gibbs free energy (gas) = -2188.47252 au

Gibbs free energy (in solvent) = -2187.70176 au

Zero-point correction = 0.85106 au

Thermal correction to Gibbs free energy = 0.76474 au

Standard orientation:

| Center<br>Number | Atomic<br>Number | Atomic<br>Type | Coordinates (Angstroms) |           |           |
|------------------|------------------|----------------|-------------------------|-----------|-----------|
|                  |                  |                | X                       | Y         | Z         |
| 1                | 1                | 0              | 0.526023                | 1.686321  | -0.206932 |
| 2                | 7                | 0              | -0.294493               | 2.215896  | -0.605793 |
| 3                | 6                | 0              | -1.553925               | 1.900106  | 0.196811  |
| 4                | 6                | 0              | -0.471043               | 1.941064  | -2.079319 |
| 5                | 6                | 0              | 0.056821                | 3.672908  | -0.396154 |
| 6                | 6                | 0              | -1.800532               | 0.383059  | 0.391615  |
| 7                | 6                | 0              | -2.735117               | 2.650466  | -0.467385 |
| 8                | 6                | 0              | -1.542750               | 2.899310  | -2.645837 |
| 9                | 6                | 0              | -1.118777               | 4.586648  | -0.841277 |
| 10               | 6                | 0              | -3.090258               | 0.164409  | 1.184687  |
| 11               | 6                | 0              | -2.195214               | 3.671414  | -1.484475 |
| 12               | 6                | 0              | -3.117266               | 0.450806  | 2.531310  |
| 13               | 6                | 0              | -4.286642               | -0.318519 | 0.567346  |
| 14               | 6                | 0              | -4.308455               | 0.277864  | 3.270867  |
| 15               | 6                | 0              | -5.437233               | -0.453566 | 1.417597  |
| 16               | 7                | 0              | -5.429931               | -0.153585 | 2.742702  |



|    |   |   |           |           |           |
|----|---|---|-----------|-----------|-----------|
| 17 | 1 | 0 | -0.721870 | 0.889843  | -2.189733 |
| 18 | 1 | 0 | 0.508350  | 2.064495  | -2.537519 |
| 19 | 1 | 0 | 0.964804  | 3.853106  | -0.971046 |
| 20 | 1 | 0 | 0.306909  | 3.782697  | 0.658116  |
| 21 | 1 | 0 | -1.885651 | -0.096926 | -0.578695 |
| 22 | 1 | 0 | -3.336818 | 3.132415  | 0.303087  |
| 23 | 1 | 0 | -3.395337 | 1.949849  | -0.982332 |
| 24 | 1 | 0 | -1.092761 | 3.596538  | -3.356036 |
| 25 | 1 | 0 | -2.297870 | 2.330494  | -3.191981 |
| 26 | 1 | 0 | -0.753570 | 5.256592  | -1.624202 |
| 27 | 1 | 0 | -3.015331 | 4.287715  | -1.854743 |
| 28 | 1 | 0 | -2.228987 | 0.798795  | 3.047270  |
| 29 | 6 | 0 | -4.410951 | -0.667470 | -0.795657 |
| 30 | 1 | 0 | -4.322811 | 0.507415  | 4.332831  |
| 31 | 6 | 0 | -6.649074 | -0.925377 | 0.856569  |
| 32 | 7 | 0 | -0.635074 | -0.185278 | 1.092914  |
| 33 | 1 | 0 | 0.044266  | 0.483015  | 1.470737  |
| 34 | 6 | 0 | -6.745192 | -1.253883 | -0.471469 |
| 35 | 6 | 0 | -5.609536 | -1.126857 | -1.312663 |
| 36 | 1 | 0 | -7.499020 | -1.016566 | 1.521120  |
| 37 | 1 | 0 | -7.685748 | -1.611815 | -0.866916 |
| 38 | 8 | 0 | -5.608094 | -1.434580 | -2.632171 |
| 39 | 1 | 0 | -3.577612 | -0.611587 | -1.483031 |
| 40 | 6 | 0 | -6.806590 | -1.918134 | -3.241621 |
| 41 | 1 | 0 | -6.552576 | -2.091155 | -4.285118 |
| 42 | 1 | 0 | -7.133014 | -2.858648 | -2.787875 |
| 43 | 1 | 0 | -7.610371 | -1.178130 | -3.183289 |
| 44 | 6 | 0 | -1.723070 | 6.767265  | 0.241169  |
| 45 | 1 | 0 | -2.110315 | 7.339809  | 1.075514  |
| 46 | 6 | 0 | -1.636793 | 5.441715  | 0.286518  |
| 47 | 1 | 0 | -1.955666 | 4.924633  | 1.190399  |
| 48 | 1 | 0 | -1.409914 | 7.330233  | -0.632792 |
| 49 | 1 | 0 | -1.353438 | 2.323885  | 1.184182  |
| 50 | 6 | 0 | -0.230295 | -1.445690 | 1.192296  |
| 51 | 6 | 0 | 5.288374  | -0.487985 | -1.493377 |
| 52 | 6 | 0 | 4.927449  | -1.239294 | -2.617519 |
| 53 | 6 | 0 | 6.295077  | 0.473081  | -1.632901 |
| 54 | 6 | 0 | 5.555259  | -1.032939 | -3.843983 |
| 55 | 6 | 0 | 6.556409  | -0.072555 | -3.968970 |
| 56 | 6 | 0 | 6.924707  | 0.681716  | -2.857625 |
| 57 | 6 | 0 | 2.838992  | 0.851132  | 0.942934  |
| 58 | 8 | 0 | 1.693310  | 1.403402  | 1.031050  |
| 59 | 6 | 0 | 3.239580  | -0.049911 | -0.055030 |
| 60 | 6 | 0 | 4.620405  | -0.679937 | -0.135056 |

|     |   |   |           |           |           |
|-----|---|---|-----------|-----------|-----------|
| 61  | 6 | 0 | 2.264056  | -0.320211 | -1.022533 |
| 62  | 8 | 0 | 3.768832  | 1.119903  | 1.891413  |
| 63  | 6 | 0 | 3.460449  | 2.123263  | 2.881992  |
| 64  | 6 | 0 | 4.662102  | 2.240779  | 3.797853  |
| 65  | 7 | 0 | 1.411941  | -0.526604 | -1.791509 |
| 66  | 6 | 0 | 1.982839  | -2.347321 | 1.649536  |
| 67  | 6 | 0 | 0.878234  | -1.668571 | 2.076156  |
| 68  | 6 | 0 | 3.228470  | -2.377446 | 2.360603  |
| 69  | 6 | 0 | 4.447596  | -2.372883 | 1.764132  |
| 70  | 6 | 0 | 4.632832  | -2.207812 | 0.284715  |
| 71  | 6 | 0 | 5.700042  | -2.377316 | 2.590424  |
| 72  | 1 | 0 | 4.148232  | -1.989582 | -2.546507 |
| 73  | 1 | 0 | 6.590583  | 1.063800  | -0.771505 |
| 74  | 1 | 0 | 5.262470  | -1.626445 | -4.702844 |
| 75  | 1 | 0 | 7.047883  | 0.083220  | -4.922398 |
| 76  | 1 | 0 | 7.706722  | 1.428146  | -2.941139 |
| 77  | 1 | 0 | 5.233018  | -0.148600 | 0.593256  |
| 78  | 1 | 0 | 3.246698  | 3.069177  | 2.377586  |
| 79  | 1 | 0 | 2.563801  | 1.826995  | 3.432039  |
| 80  | 1 | 0 | 4.472389  | 2.996121  | 4.564653  |
| 81  | 1 | 0 | 4.867775  | 1.291403  | 4.296765  |
| 82  | 1 | 0 | 5.551577  | 2.537072  | 3.238341  |
| 83  | 1 | 0 | 1.937143  | -2.826144 | 0.676180  |
| 84  | 1 | 0 | 0.956378  | -1.026335 | 2.948482  |
| 85  | 1 | 0 | 3.178375  | -2.292640 | 3.443285  |
| 86  | 1 | 0 | 3.860967  | -2.732071 | -0.284198 |
| 87  | 1 | 0 | 5.596926  | -2.627156 | -0.012439 |
| 88  | 1 | 0 | 5.491516  | -2.378860 | 3.660940  |
| 89  | 1 | 0 | 6.324263  | -1.508437 | 2.356387  |
| 90  | 1 | 0 | 6.300778  | -3.262682 | 2.353348  |
| 91  | 6 | 0 | -0.852626 | -2.561913 | 0.458537  |
| 92  | 6 | 0 | -1.018674 | -2.550470 | -0.936222 |
| 93  | 6 | 0 | -1.249942 | -3.691209 | 1.193851  |
| 94  | 6 | 0 | -1.588712 | -3.646422 | -1.572717 |
| 95  | 6 | 0 | -1.848204 | -4.768710 | 0.550931  |
| 96  | 6 | 0 | -2.018075 | -4.747546 | -0.831798 |
| 97  | 1 | 0 | -0.608450 | -1.735157 | -1.518893 |
| 98  | 1 | 0 | -1.105638 | -3.709590 | 2.266948  |
| 99  | 1 | 0 | -1.684601 | -3.647246 | -2.651897 |
| 100 | 1 | 0 | -2.169680 | -5.627773 | 1.127244  |
| 101 | 1 | 0 | -2.468760 | -5.595385 | -1.334369 |

-----

**3-3-TS2-endo**

Energy + zep (gas) = -2188.37723 au  
 Gibbs free energy (gas) = -2188.46213 au  
 Gibbs free energy (in solvent) = -2187.69112 au  
 Zero-point correction = 0.85120 au  
 Thermal correction to Gibbs free energy = 0.76631 au

Standard orientation:

| Center<br>Number | Atomic<br>Number | Atomic<br>Type | Coordinates (Angstroms) |           |           |
|------------------|------------------|----------------|-------------------------|-----------|-----------|
|                  |                  |                | X                       | Y         | Z         |
| 1                | 1                | 0              | 0.268079                | 1.215423  | -0.196028 |
| 2                | 7                | 0              | -0.482689               | 1.696681  | -0.724293 |
| 3                | 6                | 0              | -1.793919               | 1.699166  | 0.057673  |
| 4                | 6                | 0              | -0.634020               | 1.071086  | -2.094484 |
| 5                | 6                | 0              | 0.010940                | 3.123822  | -0.867991 |
| 6                | 6                | 0              | -2.236012               | 0.289965  | 0.554827  |
| 7                | 6                | 0              | -2.858704               | 2.398315  | -0.827772 |
| 8                | 6                | 0              | -1.603168               | 1.930027  | -2.936226 |
| 9                | 6                | 0              | -1.033454               | 3.986489  | -1.628133 |
| 10               | 6                | 0              | -3.540299               | 0.439961  | 1.339629  |
| 11               | 6                | 0              | -2.190666               | 3.045592  | -2.053397 |
| 12               | 6                | 0              | -3.544539               | 1.134961  | 2.528995  |
| 13               | 6                | 0              | -4.774636               | -0.122759 | 0.884485  |
| 14               | 6                | 0              | -4.739262               | 1.280109  | 3.269866  |
| 15               | 6                | 0              | -5.928809               | 0.099078  | 1.711375  |
| 16               | 7                | 0              | -5.892263               | 0.789950  | 2.881428  |
| 17               | 1                | 0              | -0.991402               | 0.054278  | -1.949794 |
| 18               | 1                | 0              | 0.367462                | 0.998894  | -2.514786 |
| 19               | 1                | 0              | 0.966815                | 3.061822  | -1.385422 |
| 20               | 1                | 0              | 0.206111                | 3.485990  | 0.140335  |
| 21               | 1                | 0              | -2.407278               | -0.348576 | -0.307265 |
| 22               | 1                | 0              | -3.401035               | 3.134374  | -0.234541 |
| 23               | 1                | 0              | -3.598610               | 1.670696  | -1.169168 |
| 24               | 1                | 0              | -1.079344               | 2.361659  | -3.791709 |
| 25               | 1                | 0              | -2.404546               | 1.304182  | -3.334051 |
| 26               | 1                | 0              | -0.566783               | 4.359575  | -2.543765 |
| 27               | 1                | 0              | -2.930422               | 3.618295  | -2.614266 |
| 28               | 1                | 0              | -2.639972               | 1.584152  | 2.927474  |
| 29               | 6                | 0              | -4.931972               | -0.865213 | -0.307401 |
| 30               | 1                | 0              | -4.729124               | 1.825644  | 4.209659  |
| 31               | 6                | 0              | -7.177337               | -0.424545 | 1.297075  |
| 32               | 7                | 0              | -1.216834               | -0.367710 | 1.371282  |
| 33               | 1                | 0              | -0.944086               | 0.149896  | 2.196174  |
| 34               | 6                | 0              | -7.305504               | -1.135988 | 0.131326  |

|    |   |   |           |           |           |
|----|---|---|-----------|-----------|-----------|
| 35 | 6 | 0 | -6.166850 | -1.364221 | -0.683445 |
| 36 | 1 | 0 | -8.029039 | -0.240195 | 1.939702  |
| 37 | 1 | 0 | -8.273849 | -1.522009 | -0.155906 |
| 38 | 8 | 0 | -6.196956 | -2.063577 | -1.844220 |
| 39 | 1 | 0 | -4.099126 | -1.090807 | -0.959646 |
| 40 | 6 | 0 | -7.434097 | -2.614246 | -2.298534 |
| 41 | 1 | 0 | -7.201086 | -3.122058 | -3.231937 |
| 42 | 1 | 0 | -7.835289 | -3.338374 | -1.583048 |
| 43 | 1 | 0 | -8.173883 | -1.830686 | -2.488534 |
| 44 | 6 | 0 | -1.403201 | 6.437726  | -1.244452 |
| 45 | 1 | 0 | -1.744250 | 7.263339  | -0.631259 |
| 46 | 6 | 0 | -1.477424 | 5.179770  | -0.821767 |
| 47 | 1 | 0 | -1.881640 | 4.980809  | 0.169710  |
| 48 | 1 | 0 | -0.999914 | 6.689725  | -2.220498 |
| 49 | 1 | 0 | -1.572888 | 2.307841  | 0.937241  |
| 50 | 6 | 0 | -0.246686 | -1.233908 | 0.892999  |
| 51 | 6 | 0 | 5.803887  | -0.379167 | -0.829116 |
| 52 | 6 | 0 | 5.843300  | -1.034700 | -2.064108 |
| 53 | 6 | 0 | 6.639071  | 0.725906  | -0.632801 |
| 54 | 6 | 0 | 6.696229  | -0.595936 | -3.074235 |
| 55 | 6 | 0 | 7.522655  | 0.505736  | -2.867100 |
| 56 | 6 | 0 | 7.491686  | 1.166879  | -1.641584 |
| 57 | 6 | 0 | 2.973767  | 0.810402  | 0.972377  |
| 58 | 8 | 0 | 1.921730  | 1.419268  | 0.758943  |
| 59 | 6 | 0 | 3.455306  | -0.314425 | 0.170971  |
| 60 | 6 | 0 | 4.889087  | -0.829635 | 0.306913  |
| 61 | 6 | 0 | 2.872659  | -0.323654 | -1.121900 |
| 62 | 8 | 0 | 3.744078  | 1.084406  | 2.034948  |
| 63 | 6 | 0 | 3.329255  | 2.170418  | 2.905639  |
| 64 | 6 | 0 | 4.377465  | 2.312373  | 3.988633  |
| 65 | 7 | 0 | 2.358484  | -0.343194 | -2.160969 |
| 66 | 6 | 0 | 2.174671  | -1.906415 | 1.158639  |
| 67 | 6 | 0 | 0.964975  | -1.254570 | 1.535623  |
| 68 | 6 | 0 | 3.110095  | -2.363295 | 2.168069  |
| 69 | 6 | 0 | 4.387726  | -2.696905 | 1.886060  |
| 70 | 6 | 0 | 4.935138  | -2.386961 | 0.527094  |
| 71 | 6 | 0 | 5.334981  | -3.206866 | 2.929843  |
| 72 | 1 | 0 | 5.207490  | -1.892766 | -2.249133 |
| 73 | 1 | 0 | 6.625188  | 1.241695  | 0.321969  |
| 74 | 1 | 0 | 6.715729  | -1.118377 | -4.023827 |
| 75 | 1 | 0 | 8.188662  | 0.843109  | -3.652705 |
| 76 | 1 | 0 | 8.136133  | 2.021071  | -1.467392 |
| 77 | 1 | 0 | 5.278911  | -0.382678 | 1.220257  |
| 78 | 1 | 0 | 3.233359  | 3.077067  | 2.304804  |

|     |   |   |           |           |           |
|-----|---|---|-----------|-----------|-----------|
| 79  | 1 | 0 | 2.346148  | 1.931796  | 3.317824  |
| 80  | 1 | 0 | 4.094803  | 3.119121  | 4.669242  |
| 81  | 1 | 0 | 4.470015  | 1.391723  | 4.568059  |
| 82  | 1 | 0 | 5.352309  | 2.553461  | 3.560670  |
| 83  | 1 | 0 | 2.168631  | -2.455318 | 0.223679  |
| 84  | 1 | 0 | 1.042791  | -0.609468 | 2.409147  |
| 85  | 1 | 0 | 2.753494  | -2.402464 | 3.193693  |
| 86  | 1 | 0 | 4.367526  | -2.882579 | -0.266978 |
| 87  | 1 | 0 | 5.970545  | -2.718678 | 0.437119  |
| 88  | 1 | 0 | 4.856997  | -3.303908 | 3.905808  |
| 89  | 1 | 0 | 6.200866  | -2.542039 | 3.028778  |
| 90  | 1 | 0 | 5.729874  | -4.187071 | 2.640730  |
| 91  | 6 | 0 | -0.704863 | -2.229746 | -0.122573 |
| 92  | 6 | 0 | -0.070071 | -2.469798 | -1.347458 |
| 93  | 6 | 0 | -1.819600 | -3.013779 | 0.225592  |
| 94  | 6 | 0 | -0.535732 | -3.473697 | -2.196118 |
| 95  | 6 | 0 | -2.274084 | -4.016940 | -0.622421 |
| 96  | 6 | 0 | -1.632856 | -4.251279 | -1.837777 |
| 97  | 1 | 0 | 0.771749  | -1.866995 | -1.659137 |
| 98  | 1 | 0 | -2.313806 | -2.845499 | 1.174946  |
| 99  | 1 | 0 | -0.034969 | -3.641201 | -3.142608 |
| 100 | 1 | 0 | -3.127812 | -4.617192 | -0.330992 |
| 101 | 1 | 0 | -1.988012 | -5.032386 | -2.499583 |

### 3-3-IM2-endo

Energy + zep (gas) = -2188.39366 au

Gibbs free energy (gas) = -2188.48082 au

Gibbs free energy (in solvent) = -2187.72214 au

Zero-point correction = 0.85303 au

Thermal correction to Gibbs free energy = 0.76587 au

Standard orientation:

| Center<br>Number | Atomic<br>Number | Atomic<br>Type | Coordinates (Angstroms) |          |           |
|------------------|------------------|----------------|-------------------------|----------|-----------|
|                  |                  |                | X                       | Y        | Z         |
| 1                | 1                | 0              | 0.051268                | 0.881420 | -0.576797 |
| 2                | 7                | 0              | -0.612511               | 1.474498 | -1.091560 |
| 3                | 6                | 0              | -1.865157               | 1.687596 | -0.235839 |
| 4                | 6                | 0              | -0.926012               | 0.814380 | -2.419059 |
| 5                | 6                | 0              | 0.061116                | 2.811530 | -1.336378 |
| 6                | 6                | 0              | -2.367043               | 0.378056 | 0.440148  |
| 7                | 6                | 0              | -2.904628               | 2.401793 | -1.131617 |
| 8                | 6                | 0              | -1.772242               | 1.786251 | -3.268676 |

|    |   |   |           |           |           |
|----|---|---|-----------|-----------|-----------|
| 9  | 6 | 0 | -0.948375 | 3.788202  | -2.003555 |
| 10 | 6 | 0 | -3.670887 | 0.665929  | 1.180519  |
| 11 | 6 | 0 | -2.211637 | 2.968009  | -2.385913 |
| 12 | 6 | 0 | -3.692367 | 1.603035  | 2.190133  |
| 13 | 6 | 0 | -4.887001 | -0.024975 | 0.878673  |
| 14 | 6 | 0 | -4.887488 | 1.867025  | 2.897564  |
| 15 | 6 | 0 | -6.042148 | 0.330017  | 1.655820  |
| 16 | 7 | 0 | -6.023972 | 1.263458  | 2.644485  |
| 17 | 1 | 0 | -1.442458 | -0.118194 | -2.201529 |
| 18 | 1 | 0 | 0.035619  | 0.570475  | -2.866546 |
| 19 | 1 | 0 | 0.926117  | 2.603553  | -1.964023 |
| 20 | 1 | 0 | 0.429251  | 3.162135  | -0.373089 |
| 21 | 1 | 0 | -2.554274 | -0.361166 | -0.336960 |
| 22 | 1 | 0 | -3.397173 | 3.186234  | -0.557952 |
| 23 | 1 | 0 | -3.686642 | 1.700817  | -1.436008 |
| 24 | 1 | 0 | -1.195922 | 2.144965  | -4.124366 |
| 25 | 1 | 0 | -2.645848 | 1.264824  | -3.664560 |
| 26 | 1 | 0 | -0.501818 | 4.147871  | -2.934259 |
| 27 | 1 | 0 | -2.903093 | 3.610022  | -2.932814 |
| 28 | 1 | 0 | -2.801242 | 2.157680  | 2.467953  |
| 29 | 6 | 0 | -5.023872 | -1.017407 | -0.117417 |
| 30 | 1 | 0 | -4.891133 | 2.606456  | 3.694032  |
| 31 | 6 | 0 | -7.271071 | -0.320350 | 1.389871  |
| 32 | 7 | 0 | -1.404312 | -0.220248 | 1.370802  |
| 33 | 1 | 0 | -1.219245 | 0.367824  | 2.173374  |
| 34 | 6 | 0 | -7.379324 | -1.278033 | 0.413521  |
| 35 | 6 | 0 | -6.239596 | -1.635491 | -0.351435 |
| 36 | 1 | 0 | -8.124151 | -0.031302 | 1.990791  |
| 37 | 1 | 0 | -8.333138 | -1.755793 | 0.236704  |
| 38 | 8 | 0 | -6.250867 | -2.574189 | -1.330198 |
| 39 | 1 | 0 | -4.187660 | -1.348422 | -0.718481 |
| 40 | 6 | 0 | -7.466882 | -3.260638 | -1.627708 |
| 41 | 1 | 0 | -7.222997 | -3.948347 | -2.434652 |
| 42 | 1 | 0 | -7.826164 | -3.829286 | -0.764556 |
| 43 | 1 | 0 | -8.244003 | -2.568347 | -1.965790 |
| 44 | 6 | 0 | -1.077684 | 6.249017  | -1.536363 |
| 45 | 1 | 0 | -1.311957 | 7.082485  | -0.884900 |
| 46 | 6 | 0 | -1.243135 | 4.990193  | -1.143420 |
| 47 | 1 | 0 | -1.615741 | 4.797434  | -0.138780 |
| 48 | 1 | 0 | -0.702355 | 6.493790  | -2.525327 |
| 49 | 1 | 0 | -1.523342 | 2.360039  | 0.553646  |
| 50 | 6 | 0 | -0.254373 | -0.900481 | 0.900820  |
| 51 | 6 | 0 | 5.516618  | -0.811804 | -0.937974 |
| 52 | 6 | 0 | 5.263003  | -1.750733 | -1.944413 |

|    |   |   |           |           |           |
|----|---|---|-----------|-----------|-----------|
| 53 | 6 | 0 | 6.460149  | 0.190716  | -1.188144 |
| 54 | 6 | 0 | 5.931132  | -1.685988 | -3.164092 |
| 55 | 6 | 0 | 6.865425  | -0.680087 | -3.400498 |
| 56 | 6 | 0 | 7.128524  | 0.260084  | -2.408006 |
| 57 | 6 | 0 | 3.335564  | 1.196418  | 1.121554  |
| 58 | 8 | 0 | 2.510466  | 2.042815  | 0.855270  |
| 59 | 6 | 0 | 3.373256  | -0.187986 | 0.418238  |
| 60 | 6 | 0 | 4.817237  | -0.853356 | 0.412874  |
| 61 | 6 | 0 | 2.849770  | 0.054863  | -0.928803 |
| 62 | 8 | 0 | 4.252628  | 1.324842  | 2.071989  |
| 63 | 6 | 0 | 4.247985  | 2.573501  | 2.834597  |
| 64 | 6 | 0 | 5.405390  | 2.517995  | 3.806221  |
| 65 | 7 | 0 | 2.341313  | 0.238123  | -1.947827 |
| 66 | 6 | 0 | 2.297643  | -1.155053 | 1.146459  |
| 67 | 6 | 0 | 0.962939  | -0.493073 | 1.326796  |
| 68 | 6 | 0 | 2.898580  | -1.682279 | 2.429189  |
| 69 | 6 | 0 | 4.103069  | -2.256930 | 2.389495  |
| 70 | 6 | 0 | 4.803938  | -2.267378 | 1.051017  |
| 71 | 6 | 0 | 4.790314  | -2.862599 | 3.576963  |
| 72 | 1 | 0 | 4.541567  | -2.544252 | -1.784299 |
| 73 | 1 | 0 | 6.681652  | 0.920028  | -0.415308 |
| 74 | 1 | 0 | 5.724383  | -2.425120 | -3.929557 |
| 75 | 1 | 0 | 7.388186  | -0.633562 | -4.348660 |
| 76 | 1 | 0 | 7.859598  | 1.042019  | -2.578526 |
| 77 | 1 | 0 | 5.405694  | -0.236568 | 1.087905  |
| 78 | 1 | 0 | 4.332092  | 3.400149  | 2.127541  |
| 79 | 1 | 0 | 3.284213  | 2.654121  | 3.340858  |
| 80 | 1 | 0 | 5.424203  | 3.434809  | 4.400348  |
| 81 | 1 | 0 | 5.306645  | 1.670822  | 4.487438  |
| 82 | 1 | 0 | 6.358121  | 2.434669  | 3.279821  |
| 83 | 1 | 0 | 2.188450  | -1.992699 | 0.452055  |
| 84 | 1 | 0 | 0.971446  | 0.397054  | 1.951216  |
| 85 | 1 | 0 | 2.320422  | -1.608346 | 3.343856  |
| 86 | 1 | 0 | 4.311632  | -2.984430 | 0.382854  |
| 87 | 1 | 0 | 5.839465  | -2.600361 | 1.147497  |
| 88 | 1 | 0 | 4.177993  | -2.793088 | 4.477761  |
| 89 | 1 | 0 | 5.747843  | -2.365860 | 3.769653  |
| 90 | 1 | 0 | 5.016440  | -3.919478 | 3.397789  |
| 91 | 6 | 0 | -0.553730 | -2.112459 | 0.080538  |
| 92 | 6 | 0 | 0.125325  | -2.425520 | -1.105616 |
| 93 | 6 | 0 | -1.558756 | -2.985159 | 0.529185  |
| 94 | 6 | 0 | -0.182388 | -3.586489 | -1.813098 |
| 95 | 6 | 0 | -1.857610 | -4.145913 | -0.176087 |
| 96 | 6 | 0 | -1.169880 | -4.451594 | -1.349522 |

|     |   |   |           |           |           |
|-----|---|---|-----------|-----------|-----------|
| 97  | 1 | 0 | 0.882319  | -1.757030 | -1.494215 |
| 98  | 1 | 0 | -2.093423 | -2.747906 | 1.440370  |
| 99  | 1 | 0 | 0.349149  | -3.809901 | -2.731011 |
| 100 | 1 | 0 | -2.628348 | -4.812796 | 0.192150  |
| 101 | 1 | 0 | -1.405214 | -5.355012 | -1.899820 |

### 3-4-COM-exo

Energy + zep (gas) = -2188.40893 au

Gibbs free energy (gas) = -2188.50388 au

Gibbs free energy (in solvent) = -2187.71159 au

Zero-point correction = 0.84837 au

Thermal correction to Gibbs free energy = 0.75342 au

Standard orientation:

| Center<br>Number | Atomic<br>Number | Atomic<br>Type | Coordinates (Angstroms) |           |           |
|------------------|------------------|----------------|-------------------------|-----------|-----------|
|                  |                  |                | X                       | Y         | Z         |
| 1                | 1                | 0              | 0.603307                | -1.720429 | 0.851146  |
| 2                | 7                | 0              | -0.078758               | -2.487769 | 0.738188  |
| 3                | 6                | 0              | -0.998763               | -2.140144 | -0.425705 |
| 4                | 6                | 0              | -0.827205               | -2.651806 | 2.038219  |
| 5                | 6                | 0              | 0.668583                | -3.756511 | 0.409649  |
| 6                | 6                | 0              | -1.482857               | -0.679454 | -0.334658 |
| 7                | 6                | 0              | -2.116574               | -3.206799 | -0.479312 |
| 8                | 6                | 0              | -1.797862               | -3.847665 | 1.914035  |
| 9                | 6                | 0              | -0.340964               | -4.920586 | 0.181474  |
| 10               | 6                | 0              | -2.281460               | -0.341893 | -1.596045 |
| 11               | 6                | 0              | -1.765793               | -4.370973 | 0.466478  |
| 12               | 6                | 0              | -1.642421               | -0.314064 | -2.816510 |
| 13               | 6                | 0              | -3.682641               | -0.050868 | -1.565566 |
| 14               | 6                | 0              | -2.361885               | -0.009878 | -3.993946 |
| 15               | 6                | 0              | -4.312891               | 0.236217  | -2.824490 |
| 16               | 7                | 0              | -3.647714               | 0.251605  | -4.010323 |
| 17               | 1                | 0              | -1.332676               | -1.710757 | 2.242948  |
| 18               | 1                | 0              | -0.069660               | -2.792714 | 2.808449  |
| 19               | 1                | 0              | 1.347587                | -3.945791 | 1.240041  |
| 20               | 1                | 0              | 1.265273                | -3.546089 | -0.476853 |
| 21               | 1                | 0              | -2.128847               | -0.572007 | 0.535146  |
| 22               | 1                | 0              | -2.244948               | -3.552007 | -1.505143 |
| 23               | 1                | 0              | -3.072571               | -2.773074 | -0.175803 |
| 24               | 1                | 0              | -1.515689               | -4.641234 | 2.609465  |
| 25               | 1                | 0              | -2.809740               | -3.534200 | 2.178096  |
| 26               | 1                | 0              | -0.140963               | -5.698329 | 0.923683  |



|    |   |   |           |           |           |
|----|---|---|-----------|-----------|-----------|
| 27 | 1 | 0 | -2.489396 | -5.178059 | 0.345209  |
| 28 | 1 | 0 | -0.579828 | -0.520713 | -2.900708 |
| 29 | 6 | 0 | -4.476468 | -0.031381 | -0.396053 |
| 30 | 1 | 0 | -1.846101 | 0.010263  | -4.950472 |
| 31 | 6 | 0 | -5.700042 | 0.518298  | -2.846401 |
| 32 | 6 | 0 | -6.449764 | 0.524602  | -1.697374 |
| 33 | 6 | 0 | -5.830033 | 0.248624  | -0.452033 |
| 34 | 1 | 0 | -6.146526 | 0.729770  | -3.809951 |
| 35 | 1 | 0 | -7.507152 | 0.744659  | -1.749972 |
| 36 | 8 | 0 | -6.489441 | 0.240566  | 0.734817  |
| 37 | 1 | 0 | -4.058286 | -0.210605 | 0.585125  |
| 38 | 6 | 0 | -7.884629 | 0.538369  | 0.759953  |
| 39 | 1 | 0 | -8.176823 | 0.478693  | 1.806331  |
| 40 | 1 | 0 | -8.085143 | 1.547215  | 0.386033  |
| 41 | 1 | 0 | -8.460472 | -0.191687 | 0.182598  |
| 42 | 6 | 0 | 0.046249  | -6.830399 | -1.396958 |
| 43 | 1 | 0 | 0.139235  | -7.232135 | -2.398912 |
| 44 | 6 | 0 | -0.189227 | -5.539774 | -1.183798 |
| 45 | 1 | 0 | -0.280524 | -4.871025 | -2.037878 |
| 46 | 1 | 0 | 0.153512  | -7.534635 | -0.577453 |
| 47 | 1 | 0 | -0.348440 | -2.222022 | -1.298095 |
| 48 | 7 | 0 | -0.316443 | 0.191902  | -0.096942 |
| 49 | 1 | 0 | 0.296122  | 0.202756  | -0.906571 |
| 50 | 6 | 0 | -0.554071 | 1.516278  | 0.369782  |
| 51 | 6 | 0 | -0.074886 | 3.958357  | 0.098954  |
| 52 | 6 | 0 | -0.112021 | 2.582797  | -0.339252 |
| 53 | 6 | 0 | 0.339376  | 4.977407  | -0.681939 |
| 54 | 6 | 0 | 0.424467  | 6.391927  | -0.292664 |
| 55 | 6 | 0 | 0.659120  | 6.786913  | 0.966799  |
| 56 | 6 | 0 | 0.255820  | 7.388783  | -1.416067 |
| 57 | 1 | 0 | -0.406461 | 4.172966  | 1.109925  |
| 58 | 1 | 0 | 0.298562  | 2.386515  | -1.328338 |
| 59 | 1 | 0 | 0.609287  | 4.755621  | -1.714060 |
| 60 | 1 | 0 | 0.835126  | 6.077034  | 1.766676  |
| 61 | 1 | 0 | 0.697448  | 7.837948  | 1.228513  |
| 62 | 1 | 0 | 1.011973  | 7.229595  | -2.192964 |
| 63 | 1 | 0 | 0.348495  | 8.415012  | -1.058428 |
| 64 | 1 | 0 | -0.721661 | 7.278177  | -1.896918 |
| 65 | 6 | 0 | -1.210682 | 1.612563  | 1.700588  |
| 66 | 6 | 0 | -0.678594 | 0.928675  | 2.805345  |
| 67 | 6 | 0 | -2.364465 | 2.386506  | 1.883886  |
| 68 | 6 | 0 | -1.279405 | 1.025805  | 4.057581  |
| 69 | 6 | 0 | -2.967213 | 2.477994  | 3.136831  |
| 70 | 6 | 0 | -2.427791 | 1.799231  | 4.226700  |

|     |   |   |           |           |           |
|-----|---|---|-----------|-----------|-----------|
| 71  | 1 | 0 | 0.228827  | 0.348345  | 2.678880  |
| 72  | 1 | 0 | -2.793039 | 2.908198  | 1.036579  |
| 73  | 1 | 0 | -0.845889 | 0.509355  | 4.907249  |
| 74  | 1 | 0 | -3.861604 | 3.077783  | 3.258938  |
| 75  | 1 | 0 | -2.895088 | 1.874863  | 5.201644  |
| 76  | 6 | 0 | 3.463154  | -0.870968 | 1.589696  |
| 77  | 8 | 0 | 2.352023  | -1.331641 | 1.805215  |
| 78  | 6 | 0 | 3.993445  | -0.638292 | 0.216935  |
| 79  | 6 | 0 | 5.255420  | -0.165550 | 0.003205  |
| 80  | 6 | 0 | 3.056182  | -0.958939 | -0.804729 |
| 81  | 8 | 0 | 4.319407  | -0.532759 | 2.546477  |
| 82  | 6 | 0 | 5.989309  | 0.129474  | -1.207387 |
| 83  | 6 | 0 | 7.311442  | 0.596745  | -1.044901 |
| 84  | 6 | 0 | 5.484904  | -0.014794 | -2.517511 |
| 85  | 6 | 0 | 8.101289  | 0.906221  | -2.142106 |
| 86  | 6 | 0 | 7.585072  | 0.757110  | -3.428172 |
| 87  | 6 | 0 | 6.278318  | 0.297509  | -3.610134 |
| 88  | 6 | 0 | 3.894551  | -0.713068 | 3.932311  |
| 89  | 6 | 0 | 5.048918  | -0.298210 | 4.817143  |
| 90  | 7 | 0 | 2.247483  | -1.229688 | -1.586694 |
| 91  | 1 | 0 | 5.809605  | 0.020416  | 0.917018  |
| 92  | 1 | 0 | 7.711512  | 0.713646  | -0.043744 |
| 93  | 1 | 0 | 4.477703  | -0.368786 | -2.684938 |
| 94  | 1 | 0 | 9.113839  | 1.262811  | -1.998086 |
| 95  | 1 | 0 | 8.197574  | 0.998253  | -4.289094 |
| 96  | 1 | 0 | 5.880632  | 0.183522  | -4.611372 |
| 97  | 1 | 0 | 3.007276  | -0.098522 | 4.094732  |
| 98  | 1 | 0 | 3.620910  | -1.760657 | 4.069733  |
| 99  | 1 | 0 | 4.763711  | -0.416755 | 5.865156  |
| 100 | 1 | 0 | 5.928764  | -0.917105 | 4.631362  |
| 101 | 1 | 0 | 5.313283  | 0.747922  | 4.652281  |

### 3-4-TS1-exo

Energy + zep (gas) = -2188.37054 au

Gibbs free energy (gas) = -2188.45601 au

Gibbs free energy (in solvent) = -2187.67389 au

Zero-point correction = 0.84873 au

Thermal correction to Gibbs free energy = 0.76326 au

Standard orientation:

| Center<br>Number | Atomic<br>Number | Atomic<br>Type | Coordinates (Angstroms) |   |   |
|------------------|------------------|----------------|-------------------------|---|---|
|                  |                  |                | X                       | Y | Z |

|    |   |   |           |           |           |
|----|---|---|-----------|-----------|-----------|
| 1  | 1 | 0 | -0.034807 | 1.139862  | 1.068967  |
| 2  | 7 | 0 | 0.768743  | 1.777775  | 1.237221  |
| 3  | 6 | 0 | 1.763536  | 1.778415  | 0.078700  |
| 4  | 6 | 0 | 1.415983  | 1.346291  | 2.533854  |
| 5  | 6 | 0 | 0.204203  | 3.174607  | 1.386128  |
| 6  | 6 | 0 | 1.975546  | 0.363862  | -0.515930 |
| 7  | 6 | 0 | 3.024400  | 2.529658  | 0.557688  |
| 8  | 6 | 0 | 2.431713  | 2.419970  | 2.976358  |
| 9  | 6 | 0 | 1.367481  | 4.193931  | 1.568375  |
| 10 | 6 | 0 | 3.063711  | 0.406468  | -1.592842 |
| 11 | 6 | 0 | 2.670849  | 3.377734  | 1.795700  |
| 12 | 6 | 0 | 2.786746  | 0.945472  | -2.828692 |
| 13 | 6 | 0 | 4.383122  | -0.092075 | -1.352041 |
| 14 | 6 | 0 | 3.793090  | 1.010348  | -3.818966 |
| 15 | 6 | 0 | 5.324247  | 0.027224  | -2.430445 |
| 16 | 7 | 0 | 5.017516  | 0.575447  | -3.635961 |
| 17 | 1 | 0 | 1.886147  | 0.381397  | 2.350879  |
| 18 | 1 | 0 | 0.603188  | 1.190397  | 3.240352  |
| 19 | 1 | 0 | -0.464446 | 3.145923  | 2.246078  |
| 20 | 1 | 0 | -0.398664 | 3.363168  | 0.497936  |
| 21 | 1 | 0 | 2.276550  | -0.333379 | 0.262930  |
| 22 | 1 | 0 | 3.403556  | 3.146764  | -0.256575 |
| 23 | 1 | 0 | 3.821613  | 1.828264  | 0.814192  |
| 24 | 1 | 0 | 2.058659  | 2.970134  | 3.843369  |
| 25 | 1 | 0 | 3.365957  | 1.941513  | 3.276451  |
| 26 | 1 | 0 | 1.177840  | 4.759632  | 2.484490  |
| 27 | 1 | 0 | 3.487941  | 4.063142  | 2.022711  |
| 28 | 1 | 0 | 1.797153  | 1.316086  | -3.072410 |
| 29 | 6 | 0 | 4.814162  | -0.687276 | -0.144672 |
| 30 | 1 | 0 | 3.565265  | 1.438690  | -4.791293 |
| 31 | 6 | 0 | 6.644320  | -0.448587 | -2.241114 |
| 32 | 6 | 0 | 7.039690  | -1.017826 | -1.057238 |
| 33 | 6 | 0 | 6.111575  | -1.143060 | 0.007982  |
| 34 | 1 | 0 | 7.331091  | -0.345075 | -3.071825 |
| 35 | 1 | 0 | 8.055680  | -1.370819 | -0.946532 |
| 36 | 8 | 0 | 6.410233  | -1.697359 | 1.209501  |
| 37 | 1 | 0 | 4.149375  | -0.830892 | 0.696934  |
| 38 | 6 | 0 | 7.720975  | -2.218781 | 1.432476  |
| 39 | 1 | 0 | 7.708168  | -2.615564 | 2.445398  |
| 40 | 1 | 0 | 7.953870  | -3.025641 | 0.731164  |
| 41 | 1 | 0 | 8.480683  | -1.434357 | 1.361660  |
| 42 | 6 | 0 | 1.427089  | 6.501857  | 0.592149  |
| 43 | 1 | 0 | 1.500534  | 7.176355  | -0.252517 |
| 44 | 6 | 0 | 1.456017  | 5.182598  | 0.433810  |

|    |   |   |           |           |           |
|----|---|---|-----------|-----------|-----------|
| 45 | 1 | 0 | 1.546901  | 4.776303  | -0.572031 |
| 46 | 1 | 0 | 1.327267  | 6.957586  | 1.572605  |
| 47 | 1 | 0 | 1.265505  | 2.368019  | -0.694571 |
| 48 | 7 | 0 | 0.678898  | -0.065497 | -1.025859 |
| 49 | 1 | 0 | 0.126391  | 0.648901  | -1.489442 |
| 50 | 6 | 0 | 0.086465  | -1.291955 | -1.041307 |
| 51 | 6 | 0 | -2.187698 | -2.123986 | -1.446555 |
| 52 | 6 | 0 | -1.034123 | -1.429600 | -1.850524 |
| 53 | 6 | 0 | -3.398882 | -2.026860 | -2.113609 |
| 54 | 6 | 0 | -4.673536 | -2.194845 | -1.533097 |
| 55 | 6 | 0 | -4.874625 | -2.196374 | -0.148562 |
| 56 | 6 | 0 | -5.877757 | -2.198850 | -2.438482 |
| 57 | 1 | 0 | -2.147273 | -2.668538 | -0.507352 |
| 58 | 1 | 0 | -1.161217 | -0.693714 | -2.639517 |
| 59 | 1 | 0 | -3.374078 | -1.669470 | -3.140311 |
| 60 | 1 | 0 | -4.066294 | -2.452659 | 0.523173  |
| 61 | 1 | 0 | -5.866445 | -2.437929 | 0.219286  |
| 62 | 1 | 0 | -6.732366 | -1.700860 | -1.977337 |
| 63 | 1 | 0 | -6.173516 | -3.234375 | -2.644200 |
| 64 | 1 | 0 | -5.669699 | -1.721535 | -3.397624 |
| 65 | 6 | 0 | 0.589619  | -2.395177 | -0.187905 |
| 66 | 6 | 0 | 0.740545  | -2.272634 | 1.202151  |
| 67 | 6 | 0 | 0.911109  | -3.614963 | -0.800107 |
| 68 | 6 | 0 | 1.214564  | -3.342950 | 1.954627  |
| 69 | 6 | 0 | 1.396239  | -4.678926 | -0.044419 |
| 70 | 6 | 0 | 1.552795  | -4.544686 | 1.332531  |
| 71 | 1 | 0 | 0.413945  | -1.366651 | 1.696092  |
| 72 | 1 | 0 | 0.792039  | -3.716507 | -1.871714 |
| 73 | 1 | 0 | 1.308620  | -3.245734 | 3.030390  |
| 74 | 1 | 0 | 1.649921  | -5.612248 | -0.532824 |
| 75 | 1 | 0 | 1.926389  | -5.374518 | 1.920874  |
| 76 | 6 | 0 | -2.583631 | -0.174962 | 1.688734  |
| 77 | 8 | 0 | -1.409968 | 0.169581  | 1.896157  |
| 78 | 6 | 0 | -3.374745 | 0.214843  | 0.538478  |
| 79 | 6 | 0 | -4.754723 | -0.131897 | 0.439945  |
| 80 | 6 | 0 | -2.636475 | 1.005540  | -0.366984 |
| 81 | 8 | 0 | -3.241448 | -0.967771 | 2.554128  |
| 82 | 6 | 0 | -5.750201 | 0.569805  | -0.394441 |
| 83 | 6 | 0 | -7.077136 | 0.610651  | 0.068104  |
| 84 | 6 | 0 | -5.454816 | 1.197280  | -1.615226 |
| 85 | 6 | 0 | -8.070781 | 1.262424  | -0.652451 |
| 86 | 6 | 0 | -7.760590 | 1.884520  | -1.860663 |
| 87 | 6 | 0 | -6.451428 | 1.847261  | -2.336667 |
| 88 | 6 | 0 | -2.557424 | -1.364693 | 3.769687  |

|     |   |   |           |           |           |
|-----|---|---|-----------|-----------|-----------|
| 89  | 6 | 0 | -3.532220 | -2.178832 | 4.594505  |
| 90  | 7 | 0 | -1.913527 | 1.628158  | -1.032822 |
| 91  | 1 | 0 | -5.160169 | -0.453614 | 1.390338  |
| 92  | 1 | 0 | -7.326267 | 0.130943  | 1.009132  |
| 93  | 1 | 0 | -4.447846 | 1.183993  | -2.008944 |
| 94  | 1 | 0 | -9.084808 | 1.287967  | -0.270688 |
| 95  | 1 | 0 | -8.532031 | 2.394913  | -2.425258 |
| 96  | 1 | 0 | -6.202879 | 2.329356  | -3.275176 |
| 97  | 1 | 0 | -1.672420 | -1.944320 | 3.498068  |
| 98  | 1 | 0 | -2.230232 | -0.465201 | 4.295713  |
| 99  | 1 | 0 | -3.050807 | -2.499595 | 5.521638  |
| 100 | 1 | 0 | -4.413592 | -1.589189 | 4.854116  |
| 101 | 1 | 0 | -3.856325 | -3.069495 | 4.052605  |

### 3-4-IM1-exo

Energy + zep (gas) = -2188.38625 au

Gibbs free energy (gas) = -2188.47102 au

Gibbs free energy (in solvent) = -2187.69881 au

Zero-point correction = 0.85153 au

Thermal correction to Gibbs free energy = 0.76676 au

Standard orientation:

| Center<br>Number | Atomic<br>Number | Atomic<br>Type | Coordinates (Angstroms) |           |           |
|------------------|------------------|----------------|-------------------------|-----------|-----------|
|                  |                  |                | X                       | Y         | Z         |
| 1                | 6                | 0              | -2.445123               | -0.460481 | 1.599399  |
| 2                | 8                | 0              | -1.260600               | -0.110734 | 1.852278  |
| 3                | 6                | 0              | -3.207341               | -0.094077 | 0.463310  |
| 4                | 6                | 0              | -4.654489               | -0.536512 | 0.321642  |
| 5                | 6                | 0              | -2.515007               | 0.744114  | -0.410854 |
| 6                | 8                | 0              | -3.093241               | -1.282354 | 2.462537  |
| 7                | 6                | 0              | -5.581640               | 0.448714  | -0.376653 |
| 8                | 6                | 0              | -6.764273               | 0.828400  | 0.269446  |
| 9                | 6                | 0              | -5.324849               | 0.984476  | -1.645179 |
| 10               | 6                | 0              | -7.662834               | 1.711265  | -0.324906 |
| 11               | 6                | 0              | -7.391875               | 2.237850  | -1.584906 |
| 12               | 6                | 0              | -6.219045               | 1.871489  | -2.241127 |
| 13               | 6                | 0              | -2.424213               | -1.650308 | 3.687979  |
| 14               | 6                | 0              | -3.397735               | -2.473953 | 4.506935  |
| 15               | 7                | 0              | -1.818730               | 1.402291  | -1.082631 |
| 16               | 1                | 0              | -5.024317               | -0.622410 | 1.343969  |
| 17               | 1                | 0              | -6.983733               | 0.428890  | 1.254610  |
| 18               | 1                | 0              | -4.421162               | 0.716459  | -2.177588 |

|    |   |   |           |           |           |
|----|---|---|-----------|-----------|-----------|
| 19 | 1 | 0 | -8.570517 | 1.989591  | 0.198515  |
| 20 | 1 | 0 | -8.085891 | 2.928174  | -2.050263 |
| 21 | 1 | 0 | -5.996527 | 2.277844  | -3.221442 |
| 22 | 1 | 0 | -1.522378 | -2.218613 | 3.445930  |
| 23 | 1 | 0 | -2.120656 | -0.742898 | 4.215409  |
| 24 | 1 | 0 | -2.927452 | -2.779080 | 5.445186  |
| 25 | 1 | 0 | -4.293321 | -1.896716 | 4.745127  |
| 26 | 1 | 0 | -3.699910 | -3.373967 | 3.967453  |
| 27 | 1 | 0 | -0.204512 | 1.010489  | 1.222986  |
| 28 | 7 | 0 | 0.558739  | 1.739505  | 1.313903  |
| 29 | 6 | 0 | 1.496395  | 1.807364  | 0.117510  |
| 30 | 6 | 0 | 1.296482  | 1.409728  | 2.588939  |
| 31 | 6 | 0 | -0.130762 | 3.079573  | 1.450755  |
| 32 | 6 | 0 | 1.856501  | 0.411586  | -0.451462 |
| 33 | 6 | 0 | 2.696429  | 2.695333  | 0.522064  |
| 34 | 6 | 0 | 2.223846  | 2.582783  | 2.966148  |
| 35 | 6 | 0 | 0.930387  | 4.212076  | 1.574210  |
| 36 | 6 | 0 | 2.943461  | 0.533238  | -1.521349 |
| 37 | 6 | 0 | 2.315757  | 3.533505  | 1.759045  |
| 38 | 6 | 0 | 2.643448  | 1.082877  | -2.747756 |
| 39 | 6 | 0 | 4.284084  | 0.096791  | -1.280341 |
| 40 | 6 | 0 | 3.648813  | 1.211744  | -3.732545 |
| 41 | 6 | 0 | 5.221295  | 0.279622  | -2.353817 |
| 42 | 7 | 0 | 4.891389  | 0.830386  | -3.551385 |
| 43 | 1 | 0 | 1.847448  | 0.486481  | 2.412849  |
| 44 | 1 | 0 | 0.531866  | 1.195079  | 3.332876  |
| 45 | 1 | 0 | -0.768765 | 3.008781  | 2.331490  |
| 46 | 1 | 0 | -0.772814 | 3.186373  | 0.576584  |
| 47 | 1 | 0 | 2.203119  | -0.247434 | 0.339072  |
| 48 | 1 | 0 | 2.973464  | 3.328048  | -0.320677 |
| 49 | 1 | 0 | 3.572869  | 2.085795  | 0.755533  |
| 50 | 1 | 0 | 1.838568  | 3.113633  | 3.839663  |
| 51 | 1 | 0 | 3.212950  | 2.203518  | 3.230572  |
| 52 | 1 | 0 | 0.721945  | 4.773325  | 2.489080  |
| 53 | 1 | 0 | 3.071714  | 4.299676  | 1.934203  |
| 54 | 1 | 0 | 1.640231  | 1.419024  | -2.986453 |
| 55 | 6 | 0 | 4.741150  | -0.490093 | -0.078969 |
| 56 | 1 | 0 | 3.404801  | 1.646481  | -4.697922 |
| 57 | 6 | 0 | 6.563189  | -0.132097 | -2.166284 |
| 58 | 6 | 0 | 6.983167  | -0.696409 | -0.988798 |
| 59 | 6 | 0 | 6.059940  | -0.881013 | 0.072411  |
| 60 | 1 | 0 | 7.246295  | 0.017838  | -2.992881 |
| 61 | 1 | 0 | 8.015215  | -0.999464 | -0.878990 |
| 62 | 8 | 0 | 6.382732  | -1.433069 | 1.267520  |

|     |   |   |           |           |           |
|-----|---|---|-----------|-----------|-----------|
| 63  | 1 | 0 | 4.083974  | -0.673408 | 0.760932  |
| 64  | 6 | 0 | 7.720451  | -1.880799 | 1.494546  |
| 65  | 1 | 0 | 7.724574  | -2.284201 | 2.504834  |
| 66  | 1 | 0 | 8.001981  | -2.668553 | 0.789472  |
| 67  | 1 | 0 | 8.434189  | -1.053811 | 1.433011  |
| 68  | 6 | 0 | 0.741038  | 6.499081  | 0.563624  |
| 69  | 1 | 0 | 0.713286  | 7.161292  | -0.293423 |
| 70  | 6 | 0 | 0.877124  | 5.184506  | 0.423157  |
| 71  | 1 | 0 | 0.951419  | 4.769004  | -0.580346 |
| 72  | 1 | 0 | 0.649181  | 6.962888  | 1.541078  |
| 73  | 1 | 0 | 0.910178  | 2.317250  | -0.649852 |
| 74  | 7 | 0 | 0.627264  | -0.160071 | -1.020444 |
| 75  | 1 | 0 | -0.022456 | 0.515975  | -1.438054 |
| 76  | 6 | 0 | 0.168454  | -1.405967 | -1.047775 |
| 77  | 6 | 0 | -2.086117 | -2.266548 | -1.457633 |
| 78  | 6 | 0 | -0.960294 | -1.625783 | -1.897971 |
| 79  | 6 | 0 | -3.308258 | -2.279119 | -2.206035 |
| 80  | 6 | 0 | -4.559145 | -2.235436 | -1.674835 |
| 81  | 6 | 0 | -4.814055 | -2.032705 | -0.213381 |
| 82  | 6 | 0 | -5.762091 | -2.305817 | -2.569241 |
| 83  | 1 | 0 | -2.074115 | -2.724790 | -0.473368 |
| 84  | 1 | 0 | -1.036335 | -0.998287 | -2.780575 |
| 85  | 1 | 0 | -3.208581 | -2.231664 | -3.288016 |
| 86  | 1 | 0 | -4.140642 | -2.637823 | 0.398652  |
| 87  | 1 | 0 | -5.835163 | -2.344899 | 0.020342  |
| 88  | 1 | 0 | -5.492826 | -2.337397 | -3.625929 |
| 89  | 1 | 0 | -6.430710 | -1.458275 | -2.397356 |
| 90  | 1 | 0 | -6.336010 | -3.210278 | -2.333626 |
| 91  | 6 | 0 | 0.761297  | -2.500662 | -0.255599 |
| 92  | 6 | 0 | 0.970804  | -2.398185 | 1.129544  |
| 93  | 6 | 0 | 1.096596  | -3.692342 | -0.916905 |
| 94  | 6 | 0 | 1.524362  | -3.464805 | 1.828545  |
| 95  | 6 | 0 | 1.673364  | -4.744838 | -0.213675 |
| 96  | 6 | 0 | 1.889849  | -4.632291 | 1.157605  |
| 97  | 1 | 0 | 0.613358  | -1.524144 | 1.659070  |
| 98  | 1 | 0 | 0.921212  | -3.780084 | -1.981865 |
| 99  | 1 | 0 | 1.658702  | -3.392577 | 2.901533  |
| 100 | 1 | 0 | 1.945246  | -5.654346 | -0.735526 |
| 101 | 1 | 0 | 2.328037  | -5.457563 | 1.706442  |

---

### 3-4-TS2-exo

Energy + zep (gas) = -2188.37210 au

Gibbs free energy (gas) = -2188.45628 au

Gibbs free energy (in solvent) = -2187.68756 au

Zero-point correction = 0.85149 au

Thermal correction to Gibbs free energy = 0.76731 au

Standard orientation:

| Center<br>Number | Atomic<br>Number | Atomic<br>Type | Coordinates (Angstroms) |           |           |
|------------------|------------------|----------------|-------------------------|-----------|-----------|
|                  |                  |                | X                       | Y         | Z         |
| 1                | 6                | 0              | -2.805290               | -0.588959 | 1.451831  |
| 2                | 8                | 0              | -1.717622               | -0.148528 | 1.831491  |
| 3                | 6                | 0              | -3.456347               | -0.227576 | 0.192797  |
| 4                | 6                | 0              | -4.926822               | -0.596847 | 0.009832  |
| 5                | 6                | 0              | -2.914980               | 0.980544  | -0.321931 |
| 6                | 8                | 0              | -3.482313               | -1.515443 | 2.151958  |
| 7                | 6                | 0              | -5.797086               | 0.437992  | -0.690938 |
| 8                | 6                | 0              | -6.971683               | 0.855229  | -0.053696 |
| 9                | 6                | 0              | -5.505353               | 0.971086  | -1.952429 |
| 10               | 6                | 0              | -7.832726               | 1.770478  | -0.653661 |
| 11               | 6                | 0              | -7.530347               | 2.290950  | -1.908984 |
| 12               | 6                | 0              | -6.363422               | 1.889004  | -2.554160 |
| 13               | 6                | 0              | -2.971833               | -1.897917 | 3.457890  |
| 14               | 6                | 0              | -4.017432               | -2.771028 | 4.118656  |
| 15               | 7                | 0              | -2.346473               | 1.910050  | -0.719501 |
| 16               | 1                | 0              | -5.332482               | -0.702673 | 1.016677  |
| 17               | 1                | 0              | -7.216937               | 0.457885  | 0.926285  |
| 18               | 1                | 0              | -4.602281               | 0.678287  | -2.472108 |
| 19               | 1                | 0              | -8.735886               | 2.077622  | -0.138940 |
| 20               | 1                | 0              | -8.195439               | 3.006059  | -2.378889 |
| 21               | 1                | 0              | -6.115812               | 2.293355  | -3.529031 |
| 22               | 1                | 0              | -2.027744               | -2.430375 | 3.323681  |
| 23               | 1                | 0              | -2.772791               | -0.989806 | 4.030029  |
| 24               | 1                | 0              | -3.665631               | -3.079955 | 5.106026  |
| 25               | 1                | 0              | -4.956184               | -2.228611 | 4.245321  |
| 26               | 1                | 0              | -4.210858               | -3.669137 | 3.528837  |
| 27               | 1                | 0              | -0.139147               | 0.796555  | 0.910940  |
| 28               | 7                | 0              | 0.602314                | 1.405015  | 1.288885  |
| 29               | 6                | 0              | 1.680977                | 1.732802  | 0.256664  |
| 30               | 6                | 0              | 1.168661                | 0.718263  | 2.512972  |
| 31               | 6                | 0              | -0.094152               | 2.690732  | 1.700072  |
| 32               | 6                | 0              | 2.178127                | 0.492545  | -0.543309 |
| 33               | 6                | 0              | 2.802119                | 2.496849  | 1.005728  |
| 34               | 6                | 0              | 2.095878                | 1.700265  | 3.260372  |
| 35               | 6                | 0              | 0.943430                | 3.695881  | 2.272385  |
| 36               | 6                | 0              | 3.357311                | 0.899267  | -1.426401 |



|    |   |   |           |           |           |
|----|---|---|-----------|-----------|-----------|
| 37 | 6 | 0 | 2.300873  | 2.951332  | 2.387856  |
| 38 | 6 | 0 | 3.183424  | 1.859047  | -2.399120 |
| 39 | 6 | 0 | 4.649679  | 0.300174  | -1.294152 |
| 40 | 6 | 0 | 4.259442  | 2.232008  | -3.236566 |
| 41 | 6 | 0 | 5.669990  | 0.761376  | -2.194521 |
| 42 | 7 | 0 | 5.460085  | 1.712217  | -3.143163 |
| 43 | 1 | 0 | 1.685790  | -0.176647 | 2.171580  |
| 44 | 1 | 0 | 0.308509  | 0.398054  | 3.095812  |
| 45 | 1 | 0 | -0.849569 | 2.399375  | 2.427756  |
| 46 | 1 | 0 | -0.612887 | 3.058443  | 0.815286  |
| 47 | 1 | 0 | 2.500996  | -0.274165 | 0.157076  |
| 48 | 1 | 0 | 3.125913  | 3.343413  | 0.401215  |
| 49 | 1 | 0 | 3.677708  | 1.855058  | 1.134380  |
| 50 | 1 | 0 | 1.662297  | 1.976281  | 4.224260  |
| 51 | 1 | 0 | 3.055483  | 1.221158  | 3.464697  |
| 52 | 1 | 0 | 0.634312  | 3.963527  | 3.286385  |
| 53 | 1 | 0 | 3.035414  | 3.614110  | 2.846908  |
| 54 | 1 | 0 | 2.226424  | 2.349286  | -2.549262 |
| 55 | 6 | 0 | 4.983673  | -0.697467 | -0.350982 |
| 56 | 1 | 0 | 4.109751  | 2.988018  | -4.002635 |
| 57 | 6 | 0 | 6.967585  | 0.202961  | -2.100579 |
| 58 | 6 | 0 | 7.267298  | -0.764072 | -1.174838 |
| 59 | 6 | 0 | 6.261443  | -1.224805 | -0.287231 |
| 60 | 1 | 0 | 7.715516  | 0.570419  | -2.791912 |
| 61 | 1 | 0 | 8.268510  | -1.170079 | -1.130785 |
| 62 | 8 | 0 | 6.463467  | -2.181700 | 0.652663  |
| 63 | 1 | 0 | 4.257149  | -1.102715 | 0.340377  |
| 64 | 6 | 0 | 7.756123  | -2.775407 | 0.779755  |
| 65 | 1 | 0 | 7.665203  | -3.501601 | 1.584701  |
| 66 | 1 | 0 | 8.051467  | -3.289856 | -0.139737 |
| 67 | 1 | 0 | 8.512430  | -2.031639 | 1.048329  |
| 68 | 6 | 0 | 0.862427  | 6.184948  | 1.975556  |
| 69 | 1 | 0 | 0.926933  | 7.071327  | 1.355913  |
| 70 | 6 | 0 | 1.013490  | 4.967072  | 1.465576  |
| 71 | 1 | 0 | 1.194846  | 4.862876  | 0.397161  |
| 72 | 1 | 0 | 0.665979  | 6.341978  | 3.031816  |
| 73 | 1 | 0 | 1.173450  | 2.398536  | -0.444497 |
| 74 | 7 | 0 | 1.125969  | -0.095487 | -1.373957 |
| 75 | 1 | 0 | 0.765115  | 0.541489  | -2.072939 |
| 76 | 6 | 0 | 0.194911  | -1.028647 | -0.937686 |
| 77 | 6 | 0 | -2.267887 | -1.649022 | -1.142443 |
| 78 | 6 | 0 | -1.073974 | -0.928904 | -1.444195 |
| 79 | 6 | 0 | -3.240120 | -1.853337 | -2.200470 |
| 80 | 6 | 0 | -4.546224 | -2.131701 | -1.995040 |

|     |   |   |           |           |           |
|-----|---|---|-----------|-----------|-----------|
| 81  | 6 | 0 | -5.094172 | -2.046167 | -0.608907 |
| 82  | 6 | 0 | -5.494354 | -2.392927 | -3.126058 |
| 83  | 1 | 0 | -2.242466 | -2.385477 | -0.346328 |
| 84  | 1 | 0 | -1.222945 | -0.108239 | -2.143671 |
| 85  | 1 | 0 | -2.875866 | -1.728275 | -3.217115 |
| 86  | 1 | 0 | -4.579961 | -2.734687 | 0.068592  |
| 87  | 1 | 0 | -6.155794 | -2.298758 | -0.589443 |
| 88  | 1 | 0 | -4.996777 | -2.350812 | -4.096312 |
| 89  | 1 | 0 | -6.315509 | -1.668918 | -3.118766 |
| 90  | 1 | 0 | -5.948325 | -3.384302 | -3.015912 |
| 91  | 6 | 0 | 0.751545  | -2.179343 | -0.165149 |
| 92  | 6 | 0 | 0.245430  | -2.624860 | 1.061018  |
| 93  | 6 | 0 | 1.823944  | -2.877899 | -0.746495 |
| 94  | 6 | 0 | 0.790274  | -3.746914 | 1.683737  |
| 95  | 6 | 0 | 2.359911  | -3.999515 | -0.123867 |
| 96  | 6 | 0 | 1.843559  | -4.439782 | 1.093778  |
| 97  | 1 | 0 | -0.548486 | -2.072494 | 1.541571  |
| 98  | 1 | 0 | 2.220934  | -2.545801 | -1.697966 |
| 99  | 1 | 0 | 0.392099  | -4.077421 | 2.636491  |
| 100 | 1 | 0 | 3.180515  | -4.530324 | -0.591675 |
| 101 | 1 | 0 | 2.261571  | -5.313790 | 1.579072  |

### 3-4-IM2-exo

Energy + zep (gas) = -2188.39926 au

Gibbs free energy (gas) = -2188.48470 au

Gibbs free energy (in solvent) = -2187.72926 au

Zero-point correction = 0.85385 au

Thermal correction to Gibbs free energy = 0.76841 au

Standard orientation:

| Center<br>Number | Atomic<br>Number | Atomic<br>Type | Coordinates (Angstroms) |           |           |
|------------------|------------------|----------------|-------------------------|-----------|-----------|
|                  |                  |                | X                       | Y         | Z         |
| 1                | 6                | 0              | 4.552946                | -1.778053 | -0.743364 |
| 2                | 8                | 0              | 4.292171                | -2.949982 | -0.742924 |
| 3                | 6                | 0              | 3.675505                | -0.682153 | -0.042337 |
| 4                | 6                | 0              | 4.609408                | 0.282600  | 0.795176  |
| 5                | 6                | 0              | 3.022177                | 0.044755  | -1.131725 |
| 6                | 8                | 0              | 5.595850                | -1.224724 | -1.365055 |
| 7                | 6                | 0              | 3.943809                | 1.578240  | 1.255330  |
| 8                | 6                | 0              | 3.949179                | 2.682474  | 0.392740  |
| 9                | 6                | 0              | 3.382250                | 1.741924  | 2.527965  |
| 10               | 6                | 0              | 3.393349                | 3.901570  | 0.775680  |

|    |   |   |           |           |           |
|----|---|---|-----------|-----------|-----------|
| 11 | 6 | 0 | 2.826185  | 4.044694  | 2.040345  |
| 12 | 6 | 0 | 2.828224  | 2.960836  | 2.915989  |
| 13 | 6 | 0 | 6.468858  | -2.130895 | -2.112186 |
| 14 | 6 | 0 | 7.545519  | -1.292155 | -2.763465 |
| 15 | 7 | 0 | 2.462382  | 0.582569  | -1.986263 |
| 16 | 1 | 0 | 5.401234  | 0.580123  | 0.107803  |
| 17 | 1 | 0 | 4.411207  | 2.594497  | -0.584646 |
| 18 | 1 | 0 | 3.377042  | 0.914881  | 3.226863  |
| 19 | 1 | 0 | 3.428769  | 4.745563  | 0.095801  |
| 20 | 1 | 0 | 2.412415  | 4.997618  | 2.349954  |
| 21 | 1 | 0 | 2.414889  | 3.067173  | 3.912824  |
| 22 | 1 | 0 | 6.874622  | -2.862685 | -1.411512 |
| 23 | 1 | 0 | 5.855318  | -2.662974 | -2.841309 |
| 24 | 1 | 0 | 8.212345  | -1.939795 | -3.337690 |
| 25 | 1 | 0 | 7.111914  | -0.557616 | -3.444900 |
| 26 | 1 | 0 | 8.142840  | -0.766306 | -2.015942 |
| 27 | 1 | 0 | 0.192625  | 0.876697  | -0.852720 |
| 28 | 7 | 0 | -0.538637 | 1.395025  | -1.356256 |
| 29 | 6 | 0 | -1.756963 | 1.578005  | -0.448366 |
| 30 | 6 | 0 | -0.862312 | 0.626999  | -2.621548 |
| 31 | 6 | 0 | 0.014454  | 2.760571  | -1.714755 |
| 32 | 6 | 0 | -2.124098 | 0.288049  | 0.337398  |
| 33 | 6 | 0 | -2.890436 | 2.158136  | -1.327209 |
| 34 | 6 | 0 | -1.833099 | 1.463784  | -3.480168 |
| 35 | 6 | 0 | -1.091192 | 3.605908  | -2.412387 |
| 36 | 6 | 0 | -3.354423 | 0.577655  | 1.196030  |
| 37 | 6 | 0 | -2.309847 | 2.674171  | -2.658375 |
| 38 | 6 | 0 | -3.285592 | 1.536358  | 2.183126  |
| 39 | 6 | 0 | -4.589373 | -0.124420 | 1.025857  |
| 40 | 6 | 0 | -4.408946 | 1.810039  | 2.996246  |
| 41 | 6 | 0 | -5.667420 | 0.242712  | 1.901945  |
| 42 | 7 | 0 | -5.560822 | 1.196893  | 2.864761  |
| 43 | 1 | 0 | -1.277966 | -0.331861 | -2.318889 |
| 44 | 1 | 0 | 0.093596  | 0.440325  | -3.107386 |
| 45 | 1 | 0 | 0.880891  | 2.581613  | -2.348201 |
| 46 | 1 | 0 | 0.361585  | 3.214562  | -0.786304 |
| 47 | 1 | 0 | -2.363024 | -0.497525 | -0.377189 |
| 48 | 1 | 0 | -3.402676 | 2.949450  | -0.780685 |
| 49 | 1 | 0 | -3.639536 | 1.388877  | -1.533687 |
| 50 | 1 | 0 | -1.340586 | 1.797527  | -4.396024 |
| 51 | 1 | 0 | -2.685027 | 0.849970  | -3.778857 |
| 52 | 1 | 0 | -0.712120 | 3.911656  | -3.391010 |
| 53 | 1 | 0 | -3.074740 | 3.224257  | -3.207655 |
| 54 | 1 | 0 | -2.374888 | 2.098799  | 2.364324  |

|    |   |   |           |           |           |
|----|---|---|-----------|-----------|-----------|
| 55 | 6 | 0 | -4.814246 | -1.138979 | 0.068672  |
| 56 | 1 | 0 | -4.340975 | 2.565392  | 3.774679  |
| 57 | 6 | 0 | -6.912108 | -0.418290 | 1.768274  |
| 58 | 6 | 0 | -7.106613 | -1.398050 | 0.827961  |
| 59 | 6 | 0 | -6.042531 | -1.768134 | -0.033925 |
| 60 | 1 | 0 | -7.705733 | -0.119767 | 2.441628  |
| 61 | 1 | 0 | -8.069732 | -1.883963 | 0.753922  |
| 62 | 8 | 0 | -6.140886 | -2.730200 | -0.984648 |
| 63 | 1 | 0 | -4.036747 | -1.479283 | -0.601959 |
| 64 | 6 | 0 | -7.372278 | -3.436293 | -1.140039 |
| 65 | 1 | 0 | -7.201091 | -4.146174 | -1.946435 |
| 66 | 1 | 0 | -7.637541 | -3.981006 | -0.228863 |
| 67 | 1 | 0 | -8.187084 | -2.761570 | -1.419831 |
| 68 | 6 | 0 | -1.350393 | 6.085577  | -2.138106 |
| 69 | 1 | 0 | -1.615668 | 6.954470  | -1.547676 |
| 70 | 6 | 0 | -1.430680 | 4.855475  | -1.641205 |
| 71 | 1 | 0 | -1.764584 | 4.723041  | -0.613370 |
| 72 | 1 | 0 | -1.018738 | 6.270330  | -3.155322 |
| 73 | 1 | 0 | -1.425198 | 2.322659  | 0.278149  |
| 74 | 7 | 0 | -1.041948 | -0.219936 | 1.180718  |
| 75 | 1 | 0 | -0.792676 | 0.396363  | 1.942591  |
| 76 | 6 | 0 | 0.047586  | -0.962636 | 0.668949  |
| 77 | 6 | 0 | 2.575526  | -1.401268 | 0.822289  |
| 78 | 6 | 0 | 1.308735  | -0.593058 | 0.993498  |
| 79 | 6 | 0 | 3.138033  | -1.817649 | 2.164333  |
| 80 | 6 | 0 | 4.320490  | -1.459983 | 2.668956  |
| 81 | 6 | 0 | 5.257635  | -0.535291 | 1.927117  |
| 82 | 6 | 0 | 4.825746  | -1.986075 | 3.985004  |
| 83 | 1 | 0 | 2.335987  | -2.319998 | 0.285483  |
| 84 | 1 | 0 | 1.417781  | 0.329623  | 1.556606  |
| 85 | 1 | 0 | 2.501392  | -2.497339 | 2.723457  |
| 86 | 1 | 0 | 6.082564  | -1.131755 | 1.515763  |
| 87 | 1 | 0 | 5.730122  | 0.156601  | 2.631517  |
| 88 | 1 | 0 | 4.116139  | -2.674879 | 4.445686  |
| 89 | 1 | 0 | 5.020588  | -1.168582 | 4.688343  |
| 90 | 1 | 0 | 5.775451  | -2.516263 | 3.851302  |
| 91 | 6 | 0 | -0.334250 | -2.193329 | -0.083022 |
| 92 | 6 | 0 | 0.298817  | -2.570231 | -1.276245 |
| 93 | 6 | 0 | -1.352854 | -3.015922 | 0.424636  |
| 94 | 6 | 0 | -0.066374 | -3.741747 | -1.935710 |
| 95 | 6 | 0 | -1.712727 | -4.187036 | -0.234067 |
| 96 | 6 | 0 | -1.070927 | -4.554163 | -1.416075 |
| 97 | 1 | 0 | 1.076499  | -1.945668 | -1.697788 |
| 98 | 1 | 0 | -1.847144 | -2.735101 | 1.346605  |

|     |   |   |           |           |           |
|-----|---|---|-----------|-----------|-----------|
| 99  | 1 | 0 | 0.437653  | -4.019574 | -2.854010 |
| 100 | 1 | 0 | -2.492997 | -4.815722 | 0.178639  |
| 101 | 1 | 0 | -1.351387 | -5.467596 | -1.927199 |

**T-n-TS**

Energy + zep (gas) = -1519.25645 au

Gibbs free energy (gas) = -1519.32262 au

Gibbs free energy (in solvent) = -1518.75533 au

Zero-point correction = 0.63769 au

Thermal correction to Gibbs free energy = 0.57151 au

Standard orientation:

| Center<br>Number | Atomic<br>Number | Atomic<br>Type | Coordinates (Angstroms) |           |           |
|------------------|------------------|----------------|-------------------------|-----------|-----------|
|                  |                  |                | X                       | Y         | Z         |
| 1                | 7                | 0              | -0.283988               | 1.592446  | 1.129382  |
| 2                | 6                | 0              | -0.792383               | 1.176161  | -0.250123 |
| 3                | 6                | 0              | 1.146767                | 2.035669  | 1.095155  |
| 4                | 6                | 0              | -1.132067               | 2.750776  | 1.595198  |
| 5                | 6                | 0              | -0.126903               | -0.156436 | -0.805271 |
| 6                | 6                | 0              | -0.769290               | 2.432162  | -1.170444 |
| 7                | 6                | 0              | 1.338550                | 3.111060  | -0.001505 |
| 8                | 6                | 0              | -0.843463               | 4.041381  | 0.784432  |
| 9                | 6                | 0              | 1.054748                | -0.065967 | -1.760420 |
| 10               | 6                | 0              | -0.046628               | 3.597374  | -0.466635 |
| 11               | 6                | 0              | 0.884719                | 0.312550  | -3.075508 |
| 12               | 6                | 0              | 2.372948                | -0.452462 | -1.346970 |
| 13               | 6                | 0              | 1.987887                | 0.376777  | -3.956226 |
| 14               | 6                | 0              | 3.420812                | -0.337298 | -2.322923 |
| 15               | 7                | 0              | 3.215310                | 0.083771  | -3.598348 |
| 16               | 1                | 0              | 1.779051                | 1.165397  | 0.934067  |
| 17               | 1                | 0              | 1.371577                | 2.421528  | 2.090981  |
| 18               | 1                | 0              | -0.929982               | 2.887212  | 2.657511  |
| 19               | 1                | 0              | -2.174749               | 2.440705  | 1.499555  |
| 20               | 1                | 0              | 0.199736                | -0.688710 | 0.077986  |
| 21               | 1                | 0              | -1.788021               | 2.721441  | -1.438180 |
| 22               | 1                | 0              | -0.246532               | 2.215173  | -2.099125 |
| 23               | 1                | 0              | 1.923403                | 3.945487  | 0.391245  |
| 24               | 1                | 0              | 1.894507                | 2.698618  | -0.846237 |
| 25               | 1                | 0              | -0.195173               | 4.694844  | 1.376356  |
| 26               | 1                | 0              | 0.057623                | 4.435477  | -1.157270 |
| 27               | 1                | 0              | -0.092703               | 0.565487  | -3.471311 |
| 28               | 6                | 0              | 2.705196                | -0.958691 | -0.068249 |

|    |   |   |           |           |           |
|----|---|---|-----------|-----------|-----------|
| 29 | 1 | 0 | 1.837544  | 0.688623  | -4.986113 |
| 30 | 6 | 0 | 4.741741  | -0.697053 | -1.958318 |
| 31 | 6 | 0 | -1.335867 | -2.286914 | 1.700384  |
| 32 | 6 | 0 | -1.103848 | -2.568804 | 0.357273  |
| 33 | 6 | 0 | -1.880171 | -1.904149 | -0.621283 |
| 34 | 7 | 0 | -1.202979 | -1.004801 | -1.388481 |
| 35 | 1 | 0 | -2.293156 | -1.836242 | 1.951711  |
| 36 | 1 | 0 | -0.080276 | -2.793187 | 0.073432  |
| 37 | 1 | 0 | -1.652078 | -0.664535 | -2.227811 |
| 38 | 6 | 0 | -0.307445 | -2.214628 | 2.644250  |
| 39 | 6 | 0 | -0.162357 | -1.088765 | 3.477920  |
| 40 | 6 | 0 | 5.038613  | -1.171762 | -0.706539 |
| 41 | 6 | 0 | 4.003108  | -1.315756 | 0.252235  |
| 42 | 1 | 0 | 5.508362  | -0.591251 | -2.715585 |
| 43 | 1 | 0 | 6.056811  | -1.443282 | -0.464347 |
| 44 | 8 | 0 | 4.194524  | -1.797233 | 1.505824  |
| 45 | 1 | 0 | 1.960850  | -1.117411 | 0.701019  |
| 46 | 6 | 0 | 5.498571  | -2.237676 | 1.894442  |
| 47 | 1 | 0 | 6.218072  | -1.413832 | 1.878151  |
| 48 | 1 | 0 | 5.391893  | -2.601451 | 2.913947  |
| 49 | 1 | 0 | 5.849227  | -3.052312 | 1.254396  |
| 50 | 6 | 0 | -0.955018 | 0.075264  | 3.353500  |
| 51 | 6 | 0 | -3.323726 | -2.057097 | -0.769858 |
| 52 | 6 | 0 | -4.130677 | -1.048607 | -1.335209 |
| 53 | 6 | 0 | -3.933061 | -3.256365 | -0.353317 |
| 54 | 6 | 0 | -5.497791 | -1.235865 | -1.476454 |
| 55 | 1 | 0 | -3.694490 | -0.103493 | -1.638688 |
| 56 | 6 | 0 | -5.304315 | -3.432738 | -0.484610 |
| 57 | 1 | 0 | -3.314474 | -4.050198 | 0.045745  |
| 58 | 6 | 0 | -6.087771 | -2.427659 | -1.050201 |
| 59 | 1 | 0 | -6.109510 | -0.452545 | -1.907691 |
| 60 | 1 | 0 | -5.761193 | -4.360926 | -0.163440 |
| 61 | 1 | 0 | -7.155851 | -2.571625 | -1.162609 |
| 62 | 6 | 0 | -2.343509 | 6.050542  | 0.876235  |
| 63 | 1 | 0 | -3.269178 | 6.556808  | 0.629642  |
| 64 | 6 | 0 | -2.106349 | 4.802600  | 0.484302  |
| 65 | 1 | 0 | -2.867801 | 4.276470  | -0.089997 |
| 66 | 6 | 0 | 1.020644  | -1.059772 | 4.413310  |
| 67 | 1 | 0 | 1.282940  | -0.043095 | 4.709138  |
| 68 | 1 | 0 | 0.770746  | -1.616583 | 5.323303  |
| 69 | 1 | 0 | 0.556231  | -2.862392 | 2.520071  |
| 70 | 1 | 0 | -1.620007 | 6.613999  | 1.457429  |
| 71 | 1 | 0 | 1.898602  | -1.537857 | 3.972410  |
| 72 | 1 | 0 | -0.892724 | 0.789875  | 4.171456  |

|    |   |   |           |           |           |
|----|---|---|-----------|-----------|-----------|
| 73 | 1 | 0 | -1.967485 | -0.040587 | 2.962940  |
| 74 | 1 | 0 | -1.826002 | 0.891890  | -0.049719 |
| 75 | 1 | 0 | -0.470361 | 0.783328  | 2.089752  |

**T-H<sub>2</sub>O-COM**

Energy + zep (gas) = -1595.78311 au

Gibbs free energy (gas) = -1595.85439 au

Gibbs free energy (in solvent) = -1595.25150 au

Zero-point correction = 0.66803 au

Thermal correction to Gibbs free energy = 0.59675 au

Standard orientation:

| Center<br>Number | Atomic<br>Number | Atomic<br>Type | Coordinates (Angstroms) |           |           |
|------------------|------------------|----------------|-------------------------|-----------|-----------|
|                  |                  |                | X                       | Y         | Z         |
| 1                | 8                | 0              | 0.216745                | 0.491829  | 2.706214  |
| 2                | 1                | 0              | 0.775914                | 0.378475  | 3.480765  |
| 3                | 1                | 0              | -6.811975               | 0.289083  | 2.510991  |
| 4                | 7                | 0              | 1.057868                | 2.129247  | 0.570063  |
| 5                | 6                | 0              | 0.311312                | 1.439642  | -0.515587 |
| 6                | 6                | 0              | 2.458395                | 2.430555  | 0.172065  |
| 7                | 6                | 0              | 0.359803                | 3.412045  | 0.840400  |
| 8                | 6                | 0              | 0.562405                | -0.113484 | -0.509128 |
| 9                | 6                | 0              | 0.482635                | 2.195243  | -1.860057 |
| 10               | 6                | 0              | 2.502481                | 3.401214  | -1.042063 |
| 11               | 6                | 0              | 0.252351                | 4.309770  | -0.441219 |
| 12               | 6                | 0              | 1.834627                | -0.665417 | -1.139318 |
| 13               | 6                | 0              | 1.063922                | 3.593319  | -1.554393 |
| 14               | 6                | 0              | 1.977975                | -0.754925 | -2.508456 |
| 15               | 6                | 0              | 2.901055                | -1.169776 | -0.323591 |
| 16               | 6                | 0              | 3.144966                | -1.319091 | -3.074896 |
| 17               | 6                | 0              | 4.036834                | -1.722927 | -1.007265 |
| 18               | 7                | 0              | 4.140253                | -1.786974 | -2.361669 |
| 19               | 1                | 0              | 2.963960                | 1.493149  | -0.050763 |
| 20               | 1                | 0              | 2.957114                | 2.857858  | 1.044304  |
| 21               | 1                | 0              | 0.912642                | 3.927777  | 1.628550  |
| 22               | 1                | 0              | -0.630425               | 3.182644  | 1.241719  |
| 23               | 1                | 0              | 0.545998                | -0.404183 | 0.537093  |
| 24               | 1                | 0              | -0.474339               | 2.269869  | -2.383175 |
| 25               | 1                | 0              | 1.176081                | 1.682134  | -2.528471 |
| 26               | 1                | 0              | 2.929115                | 4.366710  | -0.757377 |
| 27               | 1                | 0              | 3.135026                | 2.994939  | -1.835724 |
| 28               | 1                | 0              | 0.748842                | 5.264818  | -0.245003 |

|    |   |   |           |           |           |
|----|---|---|-----------|-----------|-----------|
| 29 | 1 | 0 | 1.057975  | 4.203094  | -2.459814 |
| 30 | 1 | 0 | 1.210733  | -0.397581 | -3.187362 |
| 31 | 6 | 0 | 2.904497  | -1.153486 | 1.088384  |
| 32 | 1 | 0 | 3.243632  | -1.377821 | -4.155483 |
| 33 | 6 | 0 | 5.111245  | -2.237126 | -0.242164 |
| 34 | 6 | 0 | -3.349120 | -0.683317 | 1.250731  |
| 35 | 6 | 0 | -2.077518 | -0.705469 | 0.738147  |
| 36 | 6 | 0 | -1.783408 | -1.046119 | -0.612505 |
| 37 | 7 | 0 | -0.595039 | -0.790214 | -1.147824 |
| 38 | 1 | 0 | -4.180059 | -0.933797 | 0.601256  |
| 39 | 1 | 0 | -1.264661 | -0.403181 | 1.391279  |
| 40 | 1 | 0 | -0.430146 | -1.171819 | -2.071012 |
| 41 | 6 | 0 | -3.622517 | -0.309715 | 2.598533  |
| 42 | 6 | 0 | -4.856269 | -0.252388 | 3.174566  |
| 43 | 6 | 0 | 5.090906  | -2.212770 | 1.129453  |
| 44 | 6 | 0 | 3.972780  | -1.661364 | 1.805800  |
| 45 | 1 | 0 | 5.952184  | -2.650081 | -0.784927 |
| 46 | 1 | 0 | 5.928883  | -2.612940 | 1.683594  |
| 47 | 8 | 0 | 3.868070  | -1.586476 | 3.156721  |
| 48 | 1 | 0 | 2.085412  | -0.734504 | 1.656888  |
| 49 | 6 | 0 | 4.922196  | -2.104452 | 3.969568  |
| 50 | 1 | 0 | 5.862787  | -1.575351 | 3.788850  |
| 51 | 1 | 0 | 4.607627  | -1.936492 | 4.997408  |
| 52 | 1 | 0 | 5.061432  | -3.177212 | 3.805515  |
| 53 | 6 | 0 | -6.144938 | -0.579281 | 2.481568  |
| 54 | 6 | 0 | -2.761217 | -1.704517 | -1.511497 |
| 55 | 6 | 0 | -2.981022 | -1.198357 | -2.802354 |
| 56 | 6 | 0 | -3.438528 | -2.862697 | -1.101076 |
| 57 | 6 | 0 | -3.872340 | -1.833076 | -3.660221 |
| 58 | 1 | 0 | -2.484480 | -0.288157 | -3.119980 |
| 59 | 6 | 0 | -4.314677 | -3.502158 | -1.971699 |
| 60 | 1 | 0 | -3.249492 | -3.278202 | -0.118949 |
| 61 | 6 | 0 | -4.536329 | -2.987354 | -3.247951 |
| 62 | 1 | 0 | -4.051878 | -1.425318 | -4.647675 |
| 63 | 1 | 0 | -4.819050 | -4.407436 | -1.655907 |
| 64 | 1 | 0 | -5.224212 | -3.485329 | -3.920805 |
| 65 | 6 | 0 | -1.681002 | 5.830149  | -0.957626 |
| 66 | 1 | 0 | -2.717356 | 5.989152  | -1.232469 |
| 67 | 6 | 0 | -1.172061 | 4.608880  | -0.821907 |
| 68 | 1 | 0 | -1.825107 | 3.751770  | -0.985629 |
| 69 | 6 | 0 | -4.991166 | 0.162079  | 4.608642  |
| 70 | 1 | 0 | -5.638260 | 1.042681  | 4.691450  |
| 71 | 1 | 0 | -5.477305 | -0.629494 | 5.190071  |
| 72 | 1 | 0 | -2.760486 | -0.043207 | 3.203628  |



|    |   |   |           |           |           |
|----|---|---|-----------|-----------|-----------|
| 73 | 1 | 0 | -1.077751 | 6.718728  | -0.798213 |
| 74 | 1 | 0 | -4.029310 | 0.391115  | 5.066789  |
| 75 | 1 | 0 | -6.662823 | -1.379855 | 3.020651  |
| 76 | 1 | 0 | -6.032265 | -0.885905 | 1.443459  |
| 77 | 1 | 0 | -0.735977 | 1.522308  | -0.211676 |
| 78 | 1 | 0 | 0.672278  | 1.142553  | 2.121407  |

-----

**T-H<sub>2</sub>O-TS**

Energy + zep (gas) = -1595.72048 au

Gibbs free energy (gas) = -1595.789790 au

Gibbs free energy (in solvent) = -1595.18761 au

Zero-point correction = 0.66155 au

Thermal correction to Gibbs free energy = 0.59223 au

Standard orientation:

-----

| Center<br>Number | Atomic<br>Number | Atomic<br>Type | Coordinates (Angstroms) |           |           |
|------------------|------------------|----------------|-------------------------|-----------|-----------|
|                  |                  |                | X                       | Y         | Z         |
| 1                | 8                | 0              | 0.512915                | -0.880942 | 2.414786  |
| 2                | 1                | 0              | 1.391567                | -1.012155 | 2.789396  |
| 3                | 1                | 0              | -0.157941               | -1.927994 | 2.796828  |
| 4                | 7                | 0              | 0.133709                | 1.484915  | 1.530425  |
| 5                | 6                | 0              | -0.617838               | 1.482494  | 0.211520  |
| 6                | 6                | 0              | 1.403479                | 2.287026  | 1.474171  |
| 7                | 6                | 0              | -0.771039               | 2.071932  | 2.581613  |
| 8                | 6                | 0              | -0.057452               | 0.445552  | -0.832438 |
| 9                | 6                | 0              | -0.801654               | 2.948643  | -0.249125 |
| 10               | 6                | 0              | 1.072907                | 3.770049  | 1.177059  |
| 11               | 6                | 0              | -1.196911               | 3.521735  | 2.206846  |
| 12               | 6                | 0              | 1.134282                | 0.839300  | -1.692079 |
| 13               | 6                | 0              | -0.437145               | 3.900929  | 0.907622  |
| 14               | 6                | 0              | 0.976286                | 1.612885  | -2.821065 |
| 15               | 6                | 0              | 2.450666                | 0.354561  | -1.392603 |
| 16               | 6                | 0              | 2.089591                | 1.939151  | -3.629211 |
| 17               | 6                | 0              | 3.505461                | 0.746508  | -2.284467 |
| 18               | 7                | 0              | 3.310999                | 1.533008  | -3.376173 |
| 19               | 1                | 0              | 2.043778                | 1.843747  | 0.716470  |
| 20               | 1                | 0              | 1.895548                | 2.155249  | 2.438571  |
| 21               | 1                | 0              | -0.222145               | 2.032942  | 3.522598  |
| 22               | 1                | 0              | -1.626374               | 1.401952  | 2.676286  |
| 23               | 1                | 0              | 0.221014                | -0.419218 | -0.238957 |
| 24               | 1                | 0              | -1.829812               | 3.112325  | -0.579668 |
| 25               | 1                | 0              | -0.151275               | 3.171635  | -1.096405 |

|    |   |   |           |           |           |
|----|---|---|-----------|-----------|-----------|
| 26 | 1 | 0 | 1.359858  | 4.403937  | 2.019092  |
| 27 | 1 | 0 | 1.641531  | 4.112473  | 0.310176  |
| 28 | 1 | 0 | -0.850177 | 4.197942  | 2.993090  |
| 29 | 1 | 0 | -0.682718 | 4.927418  | 0.631896  |
| 30 | 1 | 0 | 0.000340  | 1.971763  | -3.127800 |
| 31 | 6 | 0 | 2.768983  | -0.480507 | -0.295036 |
| 32 | 1 | 0 | 1.950996  | 2.555807  | -4.513091 |
| 33 | 6 | 0 | 4.821591  | 0.288993  | -2.031195 |
| 34 | 6 | 0 | -1.312787 | -3.049398 | 0.138445  |
| 35 | 6 | 0 | -1.013909 | -2.278675 | -0.988188 |
| 36 | 6 | 0 | -1.817401 | -1.206860 | -1.401342 |
| 37 | 7 | 0 | -1.207757 | -0.010898 | -1.644085 |
| 38 | 1 | 0 | -2.257341 | -2.849062 | 0.638316  |
| 39 | 1 | 0 | 0.018211  | -2.273955 | -1.323281 |
| 40 | 1 | 0 | -1.748963 | 0.694712  | -2.123076 |
| 41 | 6 | 0 | -0.395700 | -3.870974 | 0.783474  |
| 42 | 6 | 0 | -0.299466 | -3.949136 | 2.184430  |
| 43 | 6 | 0 | 5.107694  | -0.516155 | -0.957952 |
| 44 | 6 | 0 | 4.067477  | -0.906026 | -0.076024 |
| 45 | 1 | 0 | 5.594543  | 0.599197  | -2.723101 |
| 46 | 1 | 0 | 6.123555  | -0.848977 | -0.795425 |
| 47 | 8 | 0 | 4.257818  | -1.693026 | 1.014627  |
| 48 | 1 | 0 | 2.023077  | -0.809784 | 0.418600  |
| 49 | 6 | 0 | 5.564005  | -2.204063 | 1.287748  |
| 50 | 1 | 0 | 6.277881  | -1.396685 | 1.476942  |
| 51 | 1 | 0 | 5.459236  | -2.808076 | 2.186551  |
| 52 | 1 | 0 | 5.924284  | -2.834166 | 0.469270  |
| 53 | 6 | 0 | -0.932462 | -3.014729 | 3.044403  |
| 54 | 6 | 0 | -3.276823 | -1.293133 | -1.528414 |
| 55 | 6 | 0 | -4.106649 | -0.173315 | -1.327019 |
| 56 | 6 | 0 | -3.872952 | -2.519015 | -1.876353 |
| 57 | 6 | 0 | -5.484142 | -0.279701 | -1.460763 |
| 58 | 1 | 0 | -3.677557 | 0.778129  | -1.033318 |
| 59 | 6 | 0 | -5.252879 | -2.622226 | -2.003550 |
| 60 | 1 | 0 | -3.242357 | -3.376354 | -2.073336 |
| 61 | 6 | 0 | -6.060541 | -1.504990 | -1.798779 |
| 62 | 1 | 0 | -6.112458 | 0.587006  | -1.293482 |
| 63 | 1 | 0 | -5.697991 | -3.570907 | -2.278187 |
| 64 | 1 | 0 | -7.135830 | -1.585570 | -1.905562 |
| 65 | 6 | 0 | -3.407240 | 4.556159  | 2.793434  |
| 66 | 1 | 0 | -4.482695 | 4.628133  | 2.682779  |
| 67 | 6 | 0 | -2.692567 | 3.670795  | 2.106254  |
| 68 | 1 | 0 | -3.207956 | 2.996429  | 1.423459  |
| 69 | 6 | 0 | 0.694358  | -4.907845 | 2.780708  |

|    |   |   |           |           |          |
|----|---|---|-----------|-----------|----------|
| 70 | 1 | 0 | 1.196812  | -4.479550 | 3.650579 |
| 71 | 1 | 0 | 0.159676  | -5.800103 | 3.127301 |
| 72 | 1 | 0 | 0.424836  | -4.282717 | 0.202338 |
| 73 | 1 | 0 | -2.942893 | 5.243039  | 3.494310 |
| 74 | 1 | 0 | 1.442869  | -5.232301 | 2.056259 |
| 75 | 1 | 0 | -0.930756 | -3.247757 | 4.106694 |
| 76 | 1 | 0 | -1.865117 | -2.565263 | 2.699910 |
| 77 | 1 | 0 | -1.586888 | 1.064636  | 0.490049 |
| 78 | 1 | 0 | 0.339788  | 0.424893  | 1.887722 |

### T-TFA-COM

Energy + zep (gas) = -2046.26868 au

Gibbs free energy (gas) = -2046.34988 au

Gibbs free energy (in solvent) = -2046.63231 au

Zero-point correction = 0.68213 au

Thermal correction to Gibbs free energy = 0.60094 au

Standard orientation:

| Center<br>Number | Atomic<br>Number | Atomic<br>Type | Coordinates (Angstroms) |           |           |
|------------------|------------------|----------------|-------------------------|-----------|-----------|
|                  |                  |                | X                       | Y         | Z         |
| 1                | 1                | 0              | 0.548907                | 1.873943  | -0.509565 |
| 2                | 7                | 0              | -0.491961               | 2.201922  | -0.618650 |
| 3                | 6                | 0              | -1.381946               | 1.646949  | 0.479208  |
| 4                | 6                | 0              | -0.948353               | 1.768680  | -1.989256 |
| 5                | 6                | 0              | -0.507453               | 3.706077  | -0.537612 |
| 6                | 6                | 0              | -1.049327               | 0.161500  | 0.817393  |
| 7                | 6                | 0              | -2.850230               | 1.945862  | 0.082896  |
| 8                | 6                | 0              | -2.322637               | 2.398577  | -2.304902 |
| 9                | 6                | 0              | -1.968628               | 4.236519  | -0.640480 |
| 10               | 6                | 0              | -2.223677               | -0.570275 | 1.465349  |
| 11               | 6                | 0              | -2.872141               | 3.029736  | -1.013539 |
| 12               | 6                | 0              | -2.556208               | -0.322361 | 2.777944  |
| 13               | 6                | 0              | -3.001991               | -1.524238 | 0.737563  |
| 14               | 6                | 0              | -3.643076               | -0.998388 | 3.377127  |
| 15               | 6                | 0              | -4.079544               | -2.153328 | 1.448993  |
| 16               | 7                | 0              | -4.380637               | -1.881019 | 2.745422  |
| 17               | 1                | 0              | -0.976052               | 0.679587  | -1.994769 |
| 18               | 1                | 0              | -0.168191               | 2.069281  | -2.685303 |
| 19               | 1                | 0              | 0.128155                | 4.067173  | -1.344990 |
| 20               | 1                | 0              | -0.031867               | 3.982146  | 0.404221  |
| 21               | 1                | 0              | -0.770997               | -0.347508 | -0.101755 |
| 22               | 1                | 0              | -3.407197               | 2.253800  | 0.967689  |

|    |   |   |           |           |           |
|----|---|---|-----------|-----------|-----------|
| 23 | 1 | 0 | -3.342478 | 1.048555  | -0.297088 |
| 24 | 1 | 0 | -2.227899 | 3.153626  | -3.088562 |
| 25 | 1 | 0 | -3.007731 | 1.633859  | -2.676281 |
| 26 | 1 | 0 | -2.013666 | 4.944488  | -1.472182 |
| 27 | 1 | 0 | -3.894148 | 3.378975  | -1.165069 |
| 28 | 1 | 0 | -1.994090 | 0.382294  | 3.381535  |
| 29 | 6 | 0 | -2.785539 | -1.882476 | -0.612681 |
| 30 | 1 | 0 | -3.899345 | -0.795902 | 4.413296  |
| 31 | 6 | 0 | -4.877761 | -3.108956 | 0.773780  |
| 32 | 6 | 0 | 2.407945  | -2.203727 | 0.093433  |
| 33 | 6 | 0 | 1.227956  | -1.763651 | 0.638276  |
| 34 | 6 | 0 | 1.201383  | -0.682614 | 1.561469  |
| 35 | 7 | 0 | 0.138233  | 0.110822  | 1.685185  |
| 36 | 1 | 0 | 3.312921  | -1.676960 | 0.369232  |
| 37 | 1 | 0 | 0.288856  | -2.180487 | 0.290963  |
| 38 | 1 | 0 | 0.176600  | 0.777371  | 2.445146  |
| 39 | 6 | 0 | 2.503916  | -3.248610 | -0.867820 |
| 40 | 6 | 0 | 3.648665  | -3.590286 | -1.525380 |
| 41 | 6 | 0 | -4.646731 | -3.440882 | -0.536779 |
| 42 | 6 | 0 | -3.584709 | -2.820404 | -1.244360 |
| 43 | 1 | 0 | -5.681258 | -3.567605 | 1.336296  |
| 44 | 1 | 0 | -5.275836 | -4.174556 | -1.021669 |
| 45 | 8 | 0 | -3.281077 | -3.084777 | -2.536919 |
| 46 | 1 | 0 | -1.991833 | -1.448407 | -1.206916 |
| 47 | 6 | 0 | -4.057346 | -4.043627 | -3.259996 |
| 48 | 1 | 0 | -5.105019 | -3.736759 | -3.328916 |
| 49 | 1 | 0 | -3.624838 | -4.074232 | -4.257520 |
| 50 | 1 | 0 | -3.988145 | -5.035669 | -2.804250 |
| 51 | 6 | 0 | 4.959796  | -2.877165 | -1.364624 |
| 52 | 6 | 0 | 2.323793  | -0.412149 | 2.480076  |
| 53 | 6 | 0 | 2.777011  | 0.899724  | 2.693531  |
| 54 | 6 | 0 | 2.915033  | -1.472229 | 3.185738  |
| 55 | 6 | 0 | 3.799709  | 1.141457  | 3.601476  |
| 56 | 1 | 0 | 2.385550  | 1.699648  | 2.078774  |
| 57 | 6 | 0 | 3.928365  | -1.218636 | 4.103364  |
| 58 | 1 | 0 | 2.558795  | -2.483701 | 3.035877  |
| 59 | 6 | 0 | 4.371135  | 0.085956  | 4.312409  |
| 60 | 1 | 0 | 4.167908  | 2.150818  | 3.740461  |
| 61 | 1 | 0 | 4.370189  | -2.038767 | 4.656274  |
| 62 | 1 | 0 | 5.167941  | 0.279827  | 5.020797  |
| 63 | 6 | 0 | -2.848305 | 6.221266  | 0.616680  |
| 64 | 1 | 0 | -3.161231 | 6.703306  | 1.535191  |
| 65 | 6 | 0 | -2.410112 | 4.966480  | 0.602000  |
| 66 | 1 | 0 | -2.361394 | 4.418021  | 1.542019  |

|    |   |   |           |           |           |
|----|---|---|-----------|-----------|-----------|
| 67 | 6 | 0 | 3.647260  | -4.742329 | -2.482476 |
| 68 | 1 | 0 | 4.444130  | -5.448843 | -2.224633 |
| 69 | 1 | 0 | 2.696122  | -5.274956 | -2.499006 |
| 70 | 1 | 0 | 1.598985  | -3.809434 | -1.087189 |
| 71 | 1 | 0 | -2.910710 | 6.814205  | -0.290597 |
| 72 | 1 | 0 | 3.870873  | -4.389093 | -3.495719 |
| 73 | 1 | 0 | 5.487704  | -2.850238 | -2.321393 |
| 74 | 1 | 0 | 5.602346  | -3.438017 | -0.674345 |
| 75 | 1 | 0 | -1.130023 | 2.242743  | 1.360945  |
| 76 | 8 | 0 | 1.905030  | 1.361416  | -0.305322 |
| 77 | 8 | 0 | 3.870325  | 0.405288  | -0.835337 |
| 78 | 6 | 0 | 2.926273  | 1.149360  | -1.042308 |
| 79 | 6 | 0 | 2.900567  | 1.922656  | -2.396030 |
| 80 | 9 | 0 | 2.068691  | 1.278549  | -3.267850 |
| 81 | 9 | 0 | 4.090269  | 2.029276  | -2.974325 |
| 82 | 9 | 0 | 2.390572  | 3.177390  | -2.254508 |
| 83 | 1 | 0 | 4.859972  | -1.853759 | -1.006707 |

-----

**T-TFA-TS**

Energy + zep (gas) = -2046.23073 au

Gibbs free energy (gas) = -2046.31030 au

Gibbs free energy (in solvent) = -2046.632318552 au

Zero-point correction = 0.67865 au

Thermal correction to Gibbs free energy = 0.5991 au

Standard orientation:

-----

| Center<br>Number | Atomic<br>Number | Atomic<br>Type | Coordinates (Angstroms) |           |           |
|------------------|------------------|----------------|-------------------------|-----------|-----------|
|                  |                  |                | X                       | Y         | Z         |
| 1                | 1                | 0              | -0.572644               | -0.621461 | 1.338988  |
| 2                | 7                | 0              | -0.388770               | -1.648502 | 1.303544  |
| 3                | 6                | 0              | 0.726332                | -1.901925 | 0.292417  |
| 4                | 6                | 0              | -1.653577               | -2.420717 | 1.005287  |
| 5                | 6                | 0              | 0.119098                | -2.029564 | 2.678445  |
| 6                | 6                | 0              | 0.574129                | -1.025332 | -1.003745 |
| 7                | 6                | 0              | 0.891238                | -3.430189 | 0.155041  |
| 8                | 6                | 0              | -1.355245               | -3.932059 | 1.123804  |
| 9                | 6                | 0              | 0.558310                | -3.522840 | 2.688901  |
| 10               | 6                | 0              | -0.348525               | -1.530679 | -2.106261 |
| 11               | 6                | 0              | 0.158992                | -4.133220 | 1.317354  |
| 12               | 6                | 0              | 0.073913                | -2.489697 | -3.000717 |
| 13               | 6                | 0              | -1.660586               | -0.980386 | -2.286166 |
| 14               | 6                | 0              | -0.782329               | -2.933338 | -4.034477 |

|    |   |   |           |           |           |
|----|---|---|-----------|-----------|-----------|
| 15 | 6 | 0 | -2.444518 | -1.509137 | -3.366962 |
| 16 | 7 | 0 | -1.998652 | -2.474445 | -4.213341 |
| 17 | 1 | 0 | -1.983945 | -2.133370 | 0.011299  |
| 18 | 1 | 0 | -2.399318 | -2.072679 | 1.717945  |
| 19 | 1 | 0 | -0.691423 | -1.826138 | 3.377291  |
| 20 | 1 | 0 | 0.938660  | -1.349701 | 2.910509  |
| 21 | 1 | 0 | 0.192545  | -0.072828 | -0.644963 |
| 22 | 1 | 0 | 1.952544  | -3.686315 | 0.148677  |
| 23 | 1 | 0 | 0.467063  | -3.782067 | -0.786691 |
| 24 | 1 | 0 | -1.901747 | -4.365222 | 1.964279  |
| 25 | 1 | 0 | -1.692745 | -4.445802 | 0.221869  |
| 26 | 1 | 0 | -0.023470 | -4.041798 | 3.455000  |
| 27 | 1 | 0 | 0.399794  | -5.196829 | 1.314984  |
| 28 | 1 | 0 | 1.072460  | -2.908656 | -2.946589 |
| 29 | 6 | 0 | -2.223153 | 0.038925  | -1.482168 |
| 30 | 1 | 0 | -0.437976 | -3.693573 | -4.730255 |
| 31 | 6 | 0 | -3.749717 | -1.000396 | -3.578382 |
| 32 | 6 | 0 | 1.685451  | 2.848592  | -0.853582 |
| 33 | 6 | 0 | 1.553853  | 1.640757  | -1.572464 |
| 34 | 6 | 0 | 2.426191  | 0.570045  | -1.460282 |
| 35 | 7 | 0 | 1.922833  | -0.707698 | -1.485754 |
| 36 | 1 | 0 | 2.545594  | 2.943971  | -0.197143 |
| 37 | 1 | 0 | 0.588298  | 1.452499  | -2.029874 |
| 38 | 1 | 0 | 2.565157  | -1.463929 | -1.668191 |
| 39 | 6 | 0 | 0.728342  | 3.833414  | -0.819358 |
| 40 | 6 | 0 | 0.597723  | 4.783498  | 0.235384  |
| 41 | 6 | 0 | -4.275843 | -0.016475 | -2.780291 |
| 42 | 6 | 0 | -3.501230 | 0.516080  | -1.717546 |
| 43 | 1 | 0 | -4.315639 | -1.418734 | -4.401297 |
| 44 | 1 | 0 | -5.274471 | 0.351200  | -2.971971 |
| 45 | 8 | 0 | -3.930517 | 1.494753  | -0.884668 |
| 46 | 1 | 0 | -1.683604 | 0.493516  | -0.661745 |
| 47 | 6 | 0 | -5.249373 | 2.022882  | -1.041429 |
| 48 | 1 | 0 | -6.007505 | 1.244679  | -0.912884 |
| 49 | 1 | 0 | -5.359968 | 2.765512  | -0.254346 |
| 50 | 1 | 0 | -5.372251 | 2.505458  | -2.015532 |
| 51 | 6 | 0 | 1.147450  | 4.586083  | 1.502012  |
| 52 | 6 | 0 | 3.879970  | 0.716113  | -1.266231 |
| 53 | 6 | 0 | 4.611334  | -0.189094 | -0.476916 |
| 54 | 6 | 0 | 4.567823  | 1.766909  | -1.896717 |
| 55 | 6 | 0 | 5.982736  | -0.039585 | -0.312661 |
| 56 | 1 | 0 | 4.099493  | -0.994562 | 0.037675  |
| 57 | 6 | 0 | 5.939963  | 1.914518  | -1.728879 |
| 58 | 1 | 0 | 4.022108  | 2.445550  | -2.539925 |

|    |   |   |           |           |           |
|----|---|---|-----------|-----------|-----------|
| 59 | 6 | 0 | 6.650454  | 1.013005  | -0.938517 |
| 60 | 1 | 0 | 6.532210  | -0.736700 | 0.308943  |
| 61 | 1 | 0 | 6.458124  | 2.725147  | -2.227157 |
| 62 | 1 | 0 | 7.720759  | 1.126576  | -0.813123 |
| 63 | 6 | 0 | 2.470047  | -4.440164 | 4.029389  |
| 64 | 1 | 0 | 3.529984  | -4.534055 | 4.233305  |
| 65 | 6 | 0 | 2.016513  | -3.688528 | 3.031515  |
| 66 | 1 | 0 | 2.731824  | -3.148422 | 2.412799  |
| 67 | 6 | 0 | -0.329600 | 5.946631  | 0.010390  |
| 68 | 1 | 0 | 0.158738  | 6.672717  | -0.649060 |
| 69 | 1 | 0 | -1.247227 | 5.629534  | -0.492291 |
| 70 | 1 | 0 | -0.050113 | 3.826816  | -1.577680 |
| 71 | 1 | 0 | 1.798330  | -4.989801 | 4.681554  |
| 72 | 1 | 0 | -0.590282 | 6.452168  | 0.939975  |
| 73 | 1 | 0 | 1.162915  | 5.422209  | 2.195261  |
| 74 | 1 | 0 | 1.944420  | 3.857164  | 1.632225  |
| 75 | 1 | 0 | 1.600016  | -1.478254 | 0.789013  |
| 76 | 8 | 0 | -0.309269 | 1.130097  | 1.581751  |
| 77 | 8 | 0 | -0.831958 | 3.134878  | 2.501947  |
| 78 | 6 | 0 | -0.983122 | 1.899081  | 2.275005  |
| 79 | 6 | 0 | -2.192264 | 1.275560  | 3.032459  |
| 80 | 9 | 0 | -2.827178 | 0.378760  | 2.233498  |
| 81 | 9 | 0 | -3.083954 | 2.159128  | 3.453429  |
| 82 | 9 | 0 | -1.732813 | 0.580772  | 4.101735  |
| 83 | 1 | 0 | 0.080178  | 3.762315  | 1.985849  |

-----

### T-SA-COM

Energy + zep (gas) = -2015.41633 au

Gibbs free energy (gas) = -2015.50002 au

Gibbs free energy (in solvent) = -2014.75561 au

Zero-point correction = 0.76335 au

Thermal correction to Gibbs free energy = 0.67966 au

Standard orientation:

-----

| Center<br>Number | Atomic<br>Number | Atomic<br>Type | Coordinates (Angstroms) |           |           |
|------------------|------------------|----------------|-------------------------|-----------|-----------|
|                  |                  |                | X                       | Y         | Z         |
| 1                | 1                | 0              | -0.495517               | -1.147277 | -2.597373 |
| 2                | 8                | 0              | -0.349169               | -0.181004 | -2.564841 |
| 3                | 8                | 0              | 1.347223                | 1.238775  | -2.526513 |
| 4                | 6                | 0              | 0.970097                | 0.093321  | -2.625912 |
| 5                | 6                | 0              | 1.915254                | -1.059246 | -2.781167 |
| 6                | 6                | 0              | 1.556583                | -2.409607 | -2.605881 |

|    |   |   |           |           |           |
|----|---|---|-----------|-----------|-----------|
| 7  | 6 | 0 | 3.255891  | -0.754731 | -3.055804 |
| 8  | 6 | 0 | 2.523790  | -3.411419 | -2.683150 |
| 9  | 6 | 0 | 3.846100  | -3.081820 | -2.954500 |
| 10 | 6 | 0 | 4.215913  | -1.750298 | -3.151703 |
| 11 | 8 | 0 | 0.235734  | -2.718772 | -2.394189 |
| 12 | 1 | 0 | 2.227511  | -4.446013 | -2.554096 |
| 13 | 1 | 0 | 3.513875  | 0.288250  | -3.188553 |
| 14 | 1 | 0 | 5.243369  | -1.497163 | -3.382217 |
| 15 | 1 | 0 | 4.586750  | -3.869843 | -3.026964 |
| 16 | 1 | 0 | 0.118369  | -3.467551 | -1.776299 |
| 17 | 1 | 0 | 6.662011  | 1.540096  | -0.081906 |
| 18 | 7 | 0 | -3.191711 | -0.546317 | -0.577657 |
| 19 | 6 | 0 | -2.544247 | 0.719808  | -0.191528 |
| 20 | 6 | 0 | -4.066743 | -1.086083 | 0.490904  |
| 21 | 6 | 0 | -4.036796 | -0.246597 | -1.754623 |
| 22 | 6 | 0 | -1.193281 | 0.503250  | 0.559415  |
| 23 | 6 | 0 | -3.566598 | 1.688224  | 0.468246  |
| 24 | 6 | 0 | -5.240978 | -0.118180 | 0.817734  |
| 25 | 6 | 0 | -5.067002 | 0.905681  | -1.454312 |
| 26 | 6 | 0 | -1.204998 | -0.224029 | 1.895997  |
| 27 | 6 | 0 | -4.980360 | 1.200298  | 0.071096  |
| 28 | 6 | 0 | -1.410424 | 0.431325  | 3.087768  |
| 29 | 6 | 0 | -0.931046 | -1.631384 | 1.945864  |
| 30 | 6 | 0 | -1.354136 | -0.281360 | 4.310595  |
| 31 | 6 | 0 | -0.865913 | -2.242608 | 3.238679  |
| 32 | 7 | 0 | -1.084119 | -1.561928 | 4.398307  |
| 33 | 1 | 0 | -3.465023 | -1.278116 | 1.376341  |
| 34 | 1 | 0 | -4.434046 | -2.054721 | 0.145616  |
| 35 | 1 | 0 | -4.558182 | -1.164244 | -2.035305 |
| 36 | 1 | 0 | -3.384948 | 0.024736  | -2.588100 |
| 37 | 1 | 0 | -0.576564 | -0.063400 | -0.134431 |
| 38 | 1 | 0 | -3.409427 | 2.719239  | 0.134475  |
| 39 | 1 | 0 | -3.492844 | 1.684883  | 1.560615  |
| 40 | 1 | 0 | -6.200099 | -0.539785 | 0.504591  |
| 41 | 1 | 0 | -5.307532 | 0.061221  | 1.894613  |
| 42 | 1 | 0 | -6.078806 | 0.536529  | -1.648095 |
| 43 | 1 | 0 | -5.723759 | 1.952914  | 0.339987  |
| 44 | 1 | 0 | -1.593458 | 1.499003  | 3.113860  |
| 45 | 6 | 0 | -0.721416 | -2.434610 | 0.801435  |
| 46 | 1 | 0 | -1.529370 | 0.244971  | 5.245263  |
| 47 | 6 | 0 | -0.563684 | -3.623225 | 3.325046  |
| 48 | 6 | 0 | 3.030847  | 1.341067  | 1.021612  |
| 49 | 6 | 0 | 1.681669  | 1.128307  | 1.113706  |
| 50 | 6 | 0 | 0.724670  | 2.126595  | 0.780697  |



|    |   |   |           |           |           |
|----|---|---|-----------|-----------|-----------|
| 51 | 7 | 0 | -0.561995 | 1.842015  | 0.650261  |
| 52 | 1 | 0 | 3.368989  | 2.305936  | 0.663618  |
| 53 | 1 | 0 | 1.320747  | 0.155217  | 1.422181  |
| 54 | 1 | 0 | -1.168529 | 2.632702  | 0.468537  |
| 55 | 6 | 0 | 4.007610  | 0.357098  | 1.349708  |
| 56 | 6 | 0 | 5.357360  | 0.516686  | 1.261440  |
| 57 | 6 | 0 | -0.335370 | -4.380088 | 2.200861  |
| 58 | 6 | 0 | -0.419485 | -3.774198 | 0.925061  |
| 59 | 1 | 0 | -0.518996 | -4.061764 | 4.314015  |
| 60 | 1 | 0 | -0.101314 | -5.430875 | 2.303210  |
| 61 | 8 | 0 | -0.208092 | -4.463021 | -0.250568 |
| 62 | 1 | 0 | -0.854608 | -2.026361 | -0.188692 |
| 63 | 6 | 0 | -0.133039 | -5.895121 | -0.214932 |
| 64 | 1 | 0 | -1.023575 | -6.319260 | 0.254618  |
| 65 | 1 | 0 | -0.086799 | -6.216585 | -1.253726 |
| 66 | 1 | 0 | 0.765486  | -6.230224 | 0.309624  |
| 67 | 6 | 0 | 6.045266  | 1.764514  | 0.795050  |
| 68 | 6 | 0 | 1.094736  | 3.544208  | 0.549875  |
| 69 | 6 | 0 | 0.800937  | 4.131345  | -0.689926 |
| 70 | 6 | 0 | 1.708541  | 4.301255  | 1.557491  |
| 71 | 6 | 0 | 1.118505  | 5.467944  | -0.911031 |
| 72 | 1 | 0 | 0.393544  | 3.521019  | -1.488019 |
| 73 | 6 | 0 | 2.003377  | 5.641751  | 1.331459  |
| 74 | 1 | 0 | 1.925603  | 3.849864  | 2.518606  |
| 75 | 6 | 0 | 1.709612  | 6.224827  | 0.099197  |
| 76 | 1 | 0 | 0.911708  | 5.914826  | -1.876008 |
| 77 | 1 | 0 | 2.458810  | 6.231948  | 2.117643  |
| 78 | 1 | 0 | 1.947159  | 7.267684  | -0.074762 |
| 79 | 6 | 0 | -5.788651 | 2.683146  | -3.079065 |
| 80 | 1 | 0 | -5.578528 | 3.555330  | -3.687371 |
| 81 | 6 | 0 | -4.854769 | 2.118692  | -2.318425 |
| 82 | 1 | 0 | -3.853114 | 2.547789  | -2.322724 |
| 83 | 6 | 0 | 6.270283  | -0.608335 | 1.646204  |
| 84 | 1 | 0 | 6.942994  | -0.294454 | 2.452238  |
| 85 | 1 | 0 | 5.725024  | -1.493777 | 1.972584  |
| 86 | 1 | 0 | 3.633085  | -0.600369 | 1.700887  |
| 87 | 1 | 0 | -6.799878 | 2.290025  | -3.123919 |
| 88 | 1 | 0 | 6.912328  | -0.882757 | 0.801677  |
| 89 | 1 | 0 | 6.733043  | 2.120506  | 1.569460  |
| 90 | 1 | 0 | 5.371834  | 2.578833  | 0.535893  |
| 91 | 1 | 0 | -2.216725 | 1.158395  | -1.138158 |

---

**T-SA-TS**

Energy + zep (gas) = -2015.37684 au

Gibbs free energy (gas) = -2015.45569 au  
 Gibbs free energy (in solvent) = -2014.71301 au  
 Zero-point correction = 0.75923 au  
 Thermal correction to Gibbs free energy = 0.68038 au

Standard orientation:

| Center<br>Number | Atomic<br>Number | Atomic<br>Type | Coordinates (Angstroms) |           |           |
|------------------|------------------|----------------|-------------------------|-----------|-----------|
|                  |                  |                | X                       | Y         | Z         |
| 1                | 1                | 0              | -0.441590               | 0.616077  | 0.951140  |
| 2                | 8                | 0              | -0.013651               | 2.052012  | 0.311285  |
| 3                | 8                | 0              | -0.114519               | 4.288549  | 0.140445  |
| 4                | 6                | 0              | -0.629454               | 3.144589  | 0.358404  |
| 5                | 6                | 0              | -2.093155               | 3.184046  | 0.724638  |
| 6                | 6                | 0              | -3.014503               | 2.241910  | 0.233689  |
| 7                | 6                | 0              | -2.566855               | 4.220179  | 1.538231  |
| 8                | 6                | 0              | -4.365370               | 2.337989  | 0.580312  |
| 9                | 6                | 0              | -4.807176               | 3.361568  | 1.411905  |
| 10               | 6                | 0              | -3.906306               | 4.306711  | 1.898882  |
| 11               | 8                | 0              | -2.566522               | 1.248635  | -0.592243 |
| 12               | 1                | 0              | -5.067582               | 1.609125  | 0.187125  |
| 13               | 1                | 0              | -1.857797               | 4.967502  | 1.871747  |
| 14               | 1                | 0              | -4.247889               | 5.111807  | 2.537620  |
| 15               | 1                | 0              | -5.857820               | 3.422901  | 1.671226  |
| 16               | 1                | 0              | -3.303114               | 0.826380  | -1.063331 |
| 17               | 1                | 0              | 1.074494                | 4.390759  | -0.429322 |
| 18               | 7                | 0              | -0.370419               | -0.195644 | 1.645248  |
| 19               | 6                | 0              | 0.764729                | -1.119272 | 1.227881  |
| 20               | 6                | 0              | -1.681068               | -0.905775 | 1.848472  |
| 21               | 6                | 0              | 0.023557                | 0.489353  | 2.937598  |
| 22               | 6                | 0              | 0.695540                | -1.588720 | -0.285507 |
| 23               | 6                | 0              | 0.923323                | -2.207023 | 2.320669  |
| 24               | 6                | 0              | -1.496483               | -2.017531 | 2.908315  |
| 25               | 6                | 0              | 0.152047                | -0.542159 | 4.089738  |
| 26               | 6                | 0              | -0.045714               | -2.882115 | -0.611663 |
| 27               | 6                | 0              | -0.065652               | -1.948073 | 3.473384  |
| 28               | 6                | 0              | 0.538494                | -4.110703 | -0.386769 |
| 29               | 6                | 0              | -1.347129               | -2.875512 | -1.212650 |
| 30               | 6                | 0              | -0.142690               | -5.306391 | -0.711403 |
| 31               | 6                | 0              | -1.953295               | -4.147457 | -1.485363 |
| 32               | 7                | 0              | -1.346334               | -5.336799 | -1.230718 |
| 33               | 1                | 0              | -2.010008               | -1.288652 | 0.887548  |
| 34               | 1                | 0              | -2.393473               | -0.142223 | 2.159634  |
| 35               | 1                | 0              | -0.739986               | 1.241547  | 3.132871  |

|    |   |   |           |           |           |
|----|---|---|-----------|-----------|-----------|
| 36 | 1 | 0 | 0.956197  | 1.015100  | 2.736337  |
| 37 | 1 | 0 | 0.221686  | -0.771328 | -0.819506 |
| 38 | 1 | 0 | 1.951168  | -2.219033 | 2.688880  |
| 39 | 1 | 0 | 0.718149  | -3.196560 | 1.913782  |
| 40 | 1 | 0 | -2.226137 | -1.895753 | 3.711456  |
| 41 | 1 | 0 | -1.672227 | -2.997810 | 2.460143  |
| 42 | 1 | 0 | -0.658333 | -0.373005 | 4.804600  |
| 43 | 1 | 0 | 0.068487  | -2.706501 | 4.246038  |
| 44 | 1 | 0 | 1.531984  | -4.200266 | 0.037994  |
| 45 | 6 | 0 | -2.065043 | -1.704580 | -1.549101 |
| 46 | 1 | 0 | 0.335701  | -6.264107 | -0.525366 |
| 47 | 6 | 0 | -3.249884 | -4.182613 | -2.054909 |
| 48 | 6 | 0 | 2.431521  | 1.774208  | -2.003140 |
| 49 | 6 | 0 | 2.076954  | 0.412186  | -1.984822 |
| 50 | 6 | 0 | 2.754559  | -0.566507 | -1.277639 |
| 51 | 7 | 0 | 2.077380  | -1.653735 | -0.785317 |
| 52 | 1 | 0 | 3.264937  | 2.077560  | -1.376871 |
| 53 | 1 | 0 | 1.104180  | 0.158413  | -2.391577 |
| 54 | 1 | 0 | 2.640993  | -2.428943 | -0.471531 |
| 55 | 6 | 0 | 1.726118  | 2.753739  | -2.666474 |
| 56 | 6 | 0 | 1.774543  | 4.127463  | -2.329838 |
| 57 | 6 | 0 | -3.941572 | -3.031697 | -2.337869 |
| 58 | 6 | 0 | -3.340494 | -1.777576 | -2.073485 |
| 59 | 1 | 0 | -3.676884 | -5.157776 | -2.252147 |
| 60 | 1 | 0 | -4.934898 | -3.092895 | -2.760828 |
| 61 | 8 | 0 | -3.970447 | -0.580152 | -2.291044 |
| 62 | 1 | 0 | -1.647541 | -0.719284 | -1.398135 |
| 63 | 6 | 0 | -5.193894 | -0.556085 | -3.038802 |
| 64 | 1 | 0 | -6.001989 | -1.052884 | -2.495116 |
| 65 | 1 | 0 | -5.438337 | 0.496173  | -3.168337 |
| 66 | 1 | 0 | -5.059319 | -1.020391 | -4.018681 |
| 67 | 6 | 0 | 2.219713  | 4.586760  | -1.073762 |
| 68 | 6 | 0 | 4.205688  | -0.513792 | -1.011168 |
| 69 | 6 | 0 | 4.742298  | -0.981492 | 0.201710  |
| 70 | 6 | 0 | 5.084673  | -0.012414 | -1.986035 |
| 71 | 6 | 0 | 6.110408  | -0.931392 | 0.438504  |
| 72 | 1 | 0 | 4.084232  | -1.356527 | 0.977678  |
| 73 | 6 | 0 | 6.453426  | 0.033774  | -1.746691 |
| 74 | 1 | 0 | 4.689241  | 0.311450  | -2.940321 |
| 75 | 6 | 0 | 6.969530  | -0.423633 | -0.535732 |
| 76 | 1 | 0 | 6.508569  | -1.281893 | 1.383419  |
| 77 | 1 | 0 | 7.119725  | 0.414328  | -2.511604 |
| 78 | 1 | 0 | 8.036998  | -0.390128 | -0.352670 |
| 79 | 6 | 0 | 1.552905  | -0.185893 | 6.141104  |

|    |   |   |          |           |           |
|----|---|---|----------|-----------|-----------|
| 80 | 1 | 0 | 2.515138 | -0.089258 | 6.629711  |
| 81 | 6 | 0 | 1.454167 | -0.391347 | 4.831634  |
| 82 | 1 | 0 | 2.364430 | -0.451460 | 4.236770  |
| 83 | 6 | 0 | 1.131831 | 5.111946  | -3.265500 |
| 84 | 1 | 0 | 1.900147 | 5.515488  | -3.936096 |
| 85 | 1 | 0 | 0.366984 | 4.645172  | -3.888522 |
| 86 | 1 | 0 | 1.008223 | 2.451454  | -3.423680 |
| 87 | 1 | 0 | 0.674763 | -0.104841 | 6.774320  |
| 88 | 1 | 0 | 0.693223 | 5.952651  | -2.726197 |
| 89 | 1 | 0 | 2.420735 | 5.651209  | -0.976353 |
| 90 | 1 | 0 | 2.876135 | 3.945898  | -0.488278 |
| 91 | 1 | 0 | 1.623417 | -0.448583 | 1.241905  |

-----

**T-SA-COM-1**

Energy + zep (gas) = -2015.41888 au

Gibbs free energy (gas) = -2015.50059 au

Gibbs free energy (in solvent) = -2014.75077 au

Zero-point correction = 0.76366 au

Thermal correction to Gibbs free energy = 0.68193 au

Standard orientation:

-----

| Center<br>Number | Atomic<br>Number | Atomic<br>Type | Coordinates (Angstroms) |           |           |
|------------------|------------------|----------------|-------------------------|-----------|-----------|
|                  |                  |                | X                       | Y         | Z         |
| 1                | 1                | 0              | -5.195916               | -3.717549 | -0.929858 |
| 2                | 7                | 0              | 0.710072                | 0.820979  | 1.960949  |
| 3                | 6                | 0              | -0.643094               | 1.081720  | 1.429419  |
| 4                | 6                | 0              | 1.374215                | 2.058072  | 2.439035  |
| 5                | 6                | 0              | 0.545059                | -0.085670 | 3.119688  |
| 6                | 6                | 0              | -0.619667               | 1.450163  | -0.093636 |
| 7                | 6                | 0              | -1.445671               | 2.008933  | 2.378807  |
| 8                | 6                | 0              | 0.595716                | 2.708904  | 3.619291  |
| 9                | 6                | 0              | -0.439301               | 0.508852  | 4.193771  |
| 10               | 6                | 0              | -0.042128               | 2.801189  | -0.499533 |
| 11               | 6                | 0              | -0.746171               | 1.970255  | 3.758042  |
| 12               | 6                | 0              | -0.795629               | 3.953735  | -0.425811 |
| 13               | 6                | 0              | 1.295886                | 2.920508  | -1.001968 |
| 14               | 6                | 0              | -0.266295               | 5.192843  | -0.857985 |
| 15               | 6                | 0              | 1.726991                | 4.224761  | -1.414541 |
| 16               | 7                | 0              | 0.941714                | 5.334014  | -1.343916 |
| 17               | 1                | 0              | 1.467511                | 2.751089  | 1.605982  |
| 18               | 1                | 0              | 2.389220                | 1.783382  | 2.733414  |
| 19               | 1                | 0              | 1.532855                | -0.252290 | 3.555079  |

|    |   |   |           |           |           |
|----|---|---|-----------|-----------|-----------|
| 20 | 1 | 0 | 0.187878  | -1.050577 | 2.753538  |
| 21 | 1 | 0 | -0.035615 | 0.666050  | -0.572739 |
| 22 | 1 | 0 | -2.485636 | 1.679368  | 2.451196  |
| 23 | 1 | 0 | -1.457413 | 3.045803  | 2.031289  |
| 24 | 1 | 0 | 1.159923  | 2.636043  | 4.553186  |
| 25 | 1 | 0 | 0.426081  | 3.772898  | 3.431309  |
| 26 | 1 | 0 | 0.077422  | 0.563766  | 5.156851  |
| 27 | 1 | 0 | -1.376047 | 2.450529  | 4.509338  |
| 28 | 1 | 0 | -1.806930 | 3.951979  | -0.033474 |
| 29 | 6 | 0 | 2.214192  | 1.849006  | -1.087360 |
| 30 | 1 | 0 | -0.878597 | 6.088443  | -0.795196 |
| 31 | 6 | 0 | 3.041592  | 4.388468  | -1.912509 |
| 32 | 6 | 0 | -2.991394 | -2.164030 | -0.794276 |
| 33 | 6 | 0 | -2.197416 | -1.040089 | -0.755743 |
| 34 | 6 | 0 | -2.711728 | 0.271139  | -0.917221 |
| 35 | 7 | 0 | -1.994125 | 1.357828  | -0.643795 |
| 36 | 1 | 0 | -4.058600 | -2.031941 | -0.932465 |
| 37 | 1 | 0 | -1.141151 | -1.167824 | -0.545085 |
| 38 | 1 | 0 | -2.418336 | 2.236460  | -0.910465 |
| 39 | 6 | 0 | -2.479154 | -3.478389 | -0.636559 |
| 40 | 6 | 0 | -3.225998 | -4.622317 | -0.639519 |
| 41 | 6 | 0 | 3.919388  | 3.335689  | -1.975061 |
| 42 | 6 | 0 | 3.499484  | 2.055806  | -1.543866 |
| 43 | 1 | 0 | 3.333003  | 5.383199  | -2.224820 |
| 44 | 1 | 0 | 4.923614  | 3.496967  | -2.341757 |
| 45 | 8 | 0 | 4.337195  | 0.964080  | -1.524365 |
| 46 | 1 | 0 | 1.942657  | 0.855516  | -0.762321 |
| 47 | 6 | 0 | 5.599915  | 1.042118  | -2.201925 |
| 48 | 1 | 0 | 6.276597  | 1.738794  | -1.700287 |
| 49 | 1 | 0 | 6.017057  | 0.038036  | -2.164095 |
| 50 | 1 | 0 | 5.460971  | 1.335774  | -3.244839 |
| 51 | 6 | 0 | -4.714543 | -4.685366 | -0.801362 |
| 52 | 6 | 0 | -4.086212 | 0.539633  | -1.411694 |
| 53 | 6 | 0 | -4.928382 | 1.408805  | -0.701205 |
| 54 | 6 | 0 | -4.539138 | -0.031717 | -2.609889 |
| 55 | 6 | 0 | -6.205524 | 1.688529  | -1.175483 |
| 56 | 1 | 0 | -4.598359 | 1.834377  | 0.239966  |
| 57 | 6 | 0 | -5.811204 | 0.267183  | -3.087060 |
| 58 | 1 | 0 | -3.884473 | -0.680465 | -3.178840 |
| 59 | 6 | 0 | -6.646674 | 1.122031  | -2.370141 |
| 60 | 1 | 0 | -6.857283 | 2.344393  | -0.610926 |
| 61 | 1 | 0 | -6.147549 | -0.163218 | -4.022659 |
| 62 | 1 | 0 | -7.639103 | 1.347278  | -2.741977 |
| 63 | 6 | 0 | -2.078244 | -0.828326 | 5.553114  |

|    |   |   |           |           |           |
|----|---|---|-----------|-----------|-----------|
| 64 | 1 | 0 | -2.973050 | -1.434786 | 5.634250  |
| 65 | 6 | 0 | -1.669647 | -0.334472 | 4.387521  |
| 66 | 1 | 0 | -2.254032 | -0.557766 | 3.495178  |
| 67 | 6 | 0 | -2.539857 | -5.943157 | -0.467815 |
| 68 | 1 | 0 | -2.755420 | -6.596918 | -1.320926 |
| 69 | 1 | 0 | -1.404755 | -3.577383 | -0.507868 |
| 70 | 1 | 0 | -1.529303 | -0.645017 | 6.471875  |
| 71 | 1 | 0 | -2.930383 | -6.459911 | 0.416790  |
| 72 | 1 | 0 | -5.160594 | -5.175616 | 0.070860  |
| 73 | 1 | 0 | -4.966739 | -5.311912 | -1.663766 |
| 74 | 1 | 0 | -1.130285 | 0.103647  | 1.435249  |
| 75 | 1 | 0 | -1.460720 | -5.834113 | -0.367791 |
| 76 | 1 | 0 | 1.807733  | -1.279672 | 0.462264  |
| 77 | 8 | 0 | 1.071953  | -1.892178 | 0.250642  |
| 78 | 8 | 0 | 0.759872  | -3.986433 | -0.386615 |
| 79 | 6 | 0 | 1.542808  | -3.101024 | -0.126412 |
| 80 | 6 | 0 | 3.023860  | -3.287086 | -0.219463 |
| 81 | 6 | 0 | 3.965063  | -2.253200 | -0.071436 |
| 82 | 6 | 0 | 3.487640  | -4.573181 | -0.533762 |
| 83 | 6 | 0 | 5.326002  | -2.509767 | -0.235169 |
| 84 | 6 | 0 | 5.759469  | -3.791187 | -0.554286 |
| 85 | 6 | 0 | 4.839325  | -4.830298 | -0.700133 |
| 86 | 8 | 0 | 3.526304  | -0.999616 | 0.283989  |
| 87 | 1 | 0 | 6.038106  | -1.706413 | -0.082868 |
| 88 | 1 | 0 | 2.750630  | -5.356765 | -0.652878 |
| 89 | 1 | 0 | 5.177868  | -5.830121 | -0.941274 |
| 90 | 1 | 0 | 6.819646  | -3.981138 | -0.675323 |
| 91 | 1 | 0 | 3.990090  | -0.303386 | -0.220197 |

-----

**T-SA-TS-1**

Energy + zep (gas) = -2015.37862 au

Gibbs free energy (gas) = -2015.45657 au

Gibbs free energy (in solvent) = -2014.71390 au

Zero-point correction = 0.75985 au

Thermal correction to Gibbs free energy = 0.68190 au

Standard orientation:

-----

| Center<br>Number | Atomic<br>Number | Atomic<br>Type | Coordinates (Angstroms) |           |           |
|------------------|------------------|----------------|-------------------------|-----------|-----------|
|                  |                  |                | X                       | Y         | Z         |
| 1                | 1                | 0              | 3.993831                | 4.247222  | -0.733116 |
| 2                | 7                | 0              | -0.524644               | 0.251368  | 1.397678  |
| 3                | 6                | 0              | 0.745061                | -0.576391 | 1.249863  |

|    |   |   |           |           |           |
|----|---|---|-----------|-----------|-----------|
| 4  | 6 | 0 | -1.743934 | -0.566072 | 1.733518  |
| 5  | 6 | 0 | -0.300784 | 1.266486  | 2.500934  |
| 6  | 6 | 0 | 0.817305  | -1.456290 | -0.065032 |
| 7  | 6 | 0 | 1.009956  | -1.287881 | 2.602011  |
| 8  | 6 | 0 | -1.454634 | -1.409773 | 2.995143  |
| 9  | 6 | 0 | -0.183457 | 0.561843  | 3.877681  |
| 10 | 6 | 0 | 0.239669  | -2.868092 | -0.030840 |
| 11 | 6 | 0 | -0.113113 | -0.962542 | 3.604948  |
| 12 | 6 | 0 | 0.927899  | -3.908035 | 0.560228  |
| 13 | 6 | 0 | -1.013069 | -3.181415 | -0.655533 |
| 14 | 6 | 0 | 0.392888  | -5.217339 | 0.568363  |
| 15 | 6 | 0 | -1.468405 | -4.539950 | -0.571387 |
| 16 | 7 | 0 | -0.763853 | -5.530682 | 0.037138  |
| 17 | 1 | 0 | -1.996755 | -1.169498 | 0.867653  |
| 18 | 1 | 0 | -2.552750 | 0.149051  | 1.882553  |
| 19 | 1 | 0 | -1.138395 | 1.961131  | 2.457973  |
| 20 | 1 | 0 | 0.598767  | 1.820441  | 2.234056  |
| 21 | 1 | 0 | 0.286406  | -0.902176 | -0.837501 |
| 22 | 1 | 0 | 1.980457  | -0.982531 | 2.996639  |
| 23 | 1 | 0 | 1.046314  | -2.367427 | 2.469785  |
| 24 | 1 | 0 | -2.262397 | -1.285840 | 3.719287  |
| 25 | 1 | 0 | -1.411525 | -2.470945 | 2.740157  |
| 26 | 1 | 0 | -1.097828 | 0.749805  | 4.448111  |
| 27 | 1 | 0 | 0.068796  | -1.491637 | 4.541497  |
| 28 | 1 | 0 | 1.890831  | -3.754446 | 1.033981  |
| 29 | 6 | 0 | -1.822828 | -2.245729 | -1.339640 |
| 30 | 1 | 0 | 0.950226  | -6.021624 | 1.040804  |
| 31 | 6 | 0 | -2.712804 | -4.885769 | -1.153570 |
| 32 | 6 | 0 | 2.832985  | 1.943986  | -1.587057 |
| 33 | 6 | 0 | 2.323423  | 0.632112  | -1.449226 |
| 34 | 6 | 0 | 2.966222  | -0.481474 | -0.951898 |
| 35 | 7 | 0 | 2.239469  | -1.524186 | -0.430542 |
| 36 | 1 | 0 | 3.829060  | 2.165237  | -1.216706 |
| 37 | 1 | 0 | 1.258141  | 0.557257  | -1.629239 |
| 38 | 1 | 0 | 2.668840  | -2.436264 | -0.440379 |
| 39 | 6 | 0 | 2.015739  | 2.939612  | -2.067151 |
| 40 | 6 | 0 | 2.138805  | 4.331935  | -1.879330 |
| 41 | 6 | 0 | -3.496120 | -3.951118 | -1.782458 |
| 42 | 6 | 0 | -3.044999 | -2.611981 | -1.867788 |
| 43 | 1 | 0 | -3.023971 | -5.919851 | -1.076233 |
| 44 | 1 | 0 | -4.446384 | -4.244612 | -2.207086 |
| 45 | 8 | 0 | -3.776364 | -1.606006 | -2.441042 |
| 46 | 1 | 0 | -1.520166 | -1.216080 | -1.464830 |
| 47 | 6 | 0 | -4.925815 | -1.937187 | -3.233255 |

|    |   |   |           |           |           |
|----|---|---|-----------|-----------|-----------|
| 48 | 1 | 0 | -5.725540 | -2.356404 | -2.616831 |
| 49 | 1 | 0 | -5.260151 | -0.999468 | -3.671962 |
| 50 | 1 | 0 | -4.658698 | -2.635931 | -4.029450 |
| 51 | 6 | 0 | 3.328987  | 4.961444  | -1.216818 |
| 52 | 6 | 0 | 4.435033  | -0.638828 | -0.907466 |
| 53 | 6 | 0 | 5.061413  | -1.247714 | 0.192943  |
| 54 | 6 | 0 | 5.227817  | -0.200348 | -1.980153 |
| 55 | 6 | 0 | 6.442934  | -1.397575 | 0.225828  |
| 56 | 1 | 0 | 4.465450  | -1.575191 | 1.037011  |
| 57 | 6 | 0 | 6.609350  | -0.355908 | -1.944568 |
| 58 | 1 | 0 | 4.752870  | 0.231675  | -2.852186 |
| 59 | 6 | 0 | 7.219996  | -0.952339 | -0.842894 |
| 60 | 1 | 0 | 6.915603  | -1.855669 | 1.086674  |
| 61 | 1 | 0 | 7.208968  | -0.023157 | -2.783488 |
| 62 | 1 | 0 | 8.296460  | -1.074051 | -0.818514 |
| 63 | 6 | 0 | 0.863030  | 1.634741  | 5.889740  |
| 64 | 1 | 0 | 1.728210  | 2.002681  | 6.428282  |
| 65 | 6 | 0 | 0.973061  | 1.099929  | 4.677864  |
| 66 | 1 | 0 | 1.955984  | 1.042233  | 4.212728  |
| 67 | 6 | 0 | 1.020641  | 5.133461  | -2.196565 |
| 68 | 1 | 0 | 0.434209  | 4.820401  | -3.061051 |
| 69 | 1 | 0 | 1.061617  | 2.618291  | -2.470197 |
| 70 | 1 | 0 | -0.096718 | 1.725367  | 6.389093  |
| 71 | 1 | 0 | 1.127877  | 6.211298  | -2.103754 |
| 72 | 1 | 0 | 3.004440  | 5.695285  | -0.474721 |
| 73 | 1 | 0 | 3.904580  | 5.511868  | -1.969131 |
| 74 | 1 | 0 | 1.502783  | 0.187274  | 1.079984  |
| 75 | 1 | 0 | 0.098553  | 4.725698  | -1.325015 |
| 76 | 1 | 0 | -0.677212 | 0.857551  | 0.534439  |
| 77 | 8 | 0 | -0.530723 | 2.232598  | -0.381888 |
| 78 | 8 | 0 | -1.043289 | 4.391901  | -0.744925 |
| 79 | 6 | 0 | -1.343987 | 3.184969  | -0.462372 |
| 80 | 6 | 0 | -2.809217 | 2.958547  | -0.183351 |
| 81 | 6 | 0 | -3.475180 | 1.777825  | -0.564070 |
| 82 | 6 | 0 | -3.551920 | 3.974592  | 0.431736  |
| 83 | 6 | 0 | -4.841143 | 1.632460  | -0.301329 |
| 84 | 6 | 0 | -5.549740 | 2.645802  | 0.334498  |
| 85 | 6 | 0 | -4.905071 | 3.823555  | 0.708045  |
| 86 | 8 | 0 | -2.775423 | 0.792282  | -1.201390 |
| 87 | 1 | 0 | -5.345181 | 0.720977  | -0.607608 |
| 88 | 1 | 0 | -3.039563 | 4.896487  | 0.676281  |
| 89 | 1 | 0 | -5.455288 | 4.620552  | 1.192650  |
| 90 | 1 | 0 | -6.608163 | 2.515930  | 0.528986  |
| 91 | 1 | 0 | -3.378972 | 0.146083  | -1.603137 |



-----  
**T-SA-COM-2**

Energy + zep (gas) = -1976.11695 au

Gibbs free energy (gas) = -1976.19703 au

Gibbs free energy (in solvent) = -1975.46749 au

Zero-point correction = 0.73567 au

Thermal correction to Gibbs free energy = 0.65559 au

Standard orientation:

-----

| Center<br>Number | Atomic<br>Number | Atomic<br>Type | Coordinates (Angstroms) |           |           |
|------------------|------------------|----------------|-------------------------|-----------|-----------|
|                  |                  |                | X                       | Y         | Z         |
| 1                | 7                | 0              | -0.465849               | -0.768001 | 1.977547  |
| 2                | 6                | 0              | 0.899402                | -0.781038 | 1.416450  |
| 3                | 6                | 0              | -0.865548               | -2.093180 | 2.511134  |
| 4                | 6                | 0              | -0.455126               | 0.192791  | 3.104269  |
| 5                | 6                | 0              | 0.909121                | -1.191649 | -0.096708 |
| 6                | 6                | 0              | 1.884580                | -1.511153 | 2.365223  |
| 7                | 6                | 0              | 0.047117                | -2.536467 | 3.691718  |
| 8                | 6                | 0              | 0.653581                | -0.161534 | 4.163601  |
| 9                | 6                | 0              | 0.553117                | -2.630956 | -0.451226 |
| 10               | 6                | 0              | 1.226439                | -1.552126 | 3.764514  |
| 11               | 6                | 0              | 1.487984                | -3.640768 | -0.360458 |
| 12               | 6                | 0              | -0.756806               | -2.984768 | -0.915482 |
| 13               | 6                | 0              | 1.161128                | -4.964560 | -0.738248 |
| 14               | 6                | 0              | -0.976545               | -4.357138 | -1.270589 |
| 15               | 7                | 0              | -0.017957               | -5.319391 | -1.184662 |
| 16               | 1                | 0              | -0.835497               | -2.821383 | 1.703597  |
| 17               | 1                | 0              | -1.909328               | -2.012679 | 2.821402  |
| 18               | 1                | 0              | -1.445259               | 0.175886  | 3.564915  |
| 19               | 1                | 0              | -0.304501               | 1.196149  | 2.700445  |
| 20               | 1                | 0              | 0.197492                | -0.525950 | -0.582050 |
| 21               | 1                | 0              | 2.848203                | -0.995090 | 2.393281  |
| 22               | 1                | 0              | 2.077374                | -2.540043 | 2.048771  |
| 23               | 1                | 0              | -0.500906               | -2.533582 | 4.637989  |
| 24               | 1                | 0              | 0.410941                | -3.556301 | 3.537726  |
| 25               | 1                | 0              | 0.180754                | -0.281849 | 5.143205  |
| 26               | 1                | 0              | 1.955084                | -1.874273 | 4.510849  |
| 27               | 1                | 0              | 2.491609                | -3.458818 | 0.008791  |
| 28               | 6                | 0              | -1.839838               | -2.081525 | -1.014115 |
| 29               | 1                | 0              | 1.913700                | -5.744939 | -0.663652 |
| 30               | 6                | 0              | -2.257231               | -4.752912 | -1.724703 |
| 31               | 6                | 0              | 2.690119                | 2.725591  | -0.886736 |

|    |   |   |           |           |           |
|----|---|---|-----------|-----------|-----------|
| 32 | 6 | 0 | 2.070763  | 1.502178  | -0.842083 |
| 33 | 6 | 0 | 2.779826  | 0.277825  | -0.988519 |
| 34 | 7 | 0 | 2.241063  | -0.896293 | -0.681276 |
| 35 | 1 | 0 | 3.767798  | 2.764868  | -1.019553 |
| 36 | 1 | 0 | 1.006157  | 1.471732  | -0.636252 |
| 37 | 1 | 0 | 2.792299  | -1.705983 | -0.935168 |
| 38 | 6 | 0 | 2.008607  | 3.970277  | -0.740865 |
| 39 | 6 | 0 | 2.681048  | 5.145030  | -0.761084 |
| 40 | 6 | 0 | -3.296741 | -3.860523 | -1.800375 |
| 41 | 6 | 0 | -3.083006 | -2.512814 | -1.428396 |
| 42 | 1 | 0 | -2.388335 | -5.793437 | -1.993060 |
| 43 | 1 | 0 | -4.268852 | -4.197335 | -2.132939 |
| 44 | 8 | 0 | -4.087748 | -1.572290 | -1.427395 |
| 45 | 1 | 0 | -1.728512 | -1.045186 | -0.732328 |
| 46 | 6 | 0 | -5.330098 | -1.879704 | -2.076860 |
| 47 | 1 | 0 | -5.880982 | -2.651553 | -1.533064 |
| 48 | 1 | 0 | -5.901093 | -0.953593 | -2.073960 |
| 49 | 1 | 0 | -5.158057 | -2.194656 | -3.108492 |
| 50 | 6 | 0 | 4.169403  | 0.214209  | -1.505426 |
| 51 | 6 | 0 | 5.142041  | -0.523108 | -0.811933 |
| 52 | 6 | 0 | 4.512414  | 0.845766  | -2.710329 |
| 53 | 6 | 0 | 6.437190  | -0.614150 | -1.309879 |
| 54 | 1 | 0 | 4.895665  | -0.989901 | 0.135337  |
| 55 | 6 | 0 | 5.805270  | 0.734591  | -3.210838 |
| 56 | 1 | 0 | 3.760917  | 1.392316  | -3.266659 |
| 57 | 6 | 0 | 6.768852  | 0.010211  | -2.511192 |
| 58 | 1 | 0 | 7.187960  | -1.167122 | -0.758415 |
| 59 | 1 | 0 | 6.058792  | 1.209444  | -4.150959 |
| 60 | 1 | 0 | 7.776609  | -0.067892 | -2.901360 |
| 61 | 6 | 0 | 2.031116  | 1.514457  | 5.433786  |
| 62 | 1 | 0 | 2.791539  | 2.286108  | 5.470566  |
| 63 | 6 | 0 | 1.699866  | 0.910893  | 4.295614  |
| 64 | 1 | 0 | 2.208072  | 1.214914  | 3.380680  |
| 65 | 6 | 0 | 2.052151  | 6.484563  | -0.622379 |
| 66 | 1 | 0 | 2.281676  | 7.105040  | -1.496658 |
| 67 | 1 | 0 | 0.928047  | 3.959385  | -0.619276 |
| 68 | 1 | 0 | 1.550678  | 1.259330  | 6.373502  |
| 69 | 1 | 0 | 2.473048  | 7.014292  | 0.240466  |
| 70 | 1 | 0 | 3.763240  | 5.125200  | -0.886980 |
| 71 | 1 | 0 | 1.192502  | 0.271134  | 1.385299  |
| 72 | 1 | 0 | 0.970191  | 6.418719  | -0.506859 |
| 73 | 1 | 0 | -1.914830 | 1.071310  | 0.432895  |
| 74 | 8 | 0 | -1.269834 | 1.763980  | 0.174850  |
| 75 | 8 | 0 | -1.253763 | 3.845918  | -0.570821 |

|    |   |   |           |           |           |
|----|---|---|-----------|-----------|-----------|
| 76 | 6 | 0 | -1.905842 | 2.878652  | -0.249720 |
| 77 | 6 | 0 | -3.399398 | 2.859437  | -0.316184 |
| 78 | 6 | 0 | -4.188882 | 1.716829  | -0.098113 |
| 79 | 6 | 0 | -4.038158 | 4.054872  | -0.677580 |
| 80 | 6 | 0 | -5.574350 | 1.778777  | -0.241520 |
| 81 | 6 | 0 | -6.182967 | 2.973523  | -0.608104 |
| 82 | 6 | 0 | -5.415011 | 4.118986  | -0.822574 |
| 83 | 8 | 0 | -3.577304 | 0.552942  | 0.307027  |
| 84 | 1 | 0 | -6.167722 | 0.894774  | -0.036554 |
| 85 | 1 | 0 | -3.416216 | 4.923760  | -0.849732 |
| 86 | 1 | 0 | -5.890380 | 5.051426  | -1.100012 |
| 87 | 1 | 0 | -7.261034 | 3.013032  | -0.712408 |
| 88 | 1 | 0 | -3.933983 | -0.222153 | -0.168425 |

**T-SA-TS-2**

Energy + zep (gas) = -1976.07572 au

Gibbs free energy (gas) = -1976.15155 au

Gibbs free energy (in solvent) = -1975.42803 au

Zero-point correction = 0.73210 au

Thermal correction to Gibbs free energy = 0.65626 au

Standard orientation:

| Center<br>Number | Atomic<br>Number | Atomic<br>Type | Coordinates (Angstroms) |           |           |
|------------------|------------------|----------------|-------------------------|-----------|-----------|
|                  |                  |                | X                       | Y         | Z         |
| 1                | 7                | 0              | 0.468479                | -0.388511 | 1.351860  |
| 2                | 6                | 0              | -0.901046               | 0.261502  | 1.229000  |
| 3                | 6                | 0              | 1.550759                | 0.565362  | 1.784061  |
| 4                | 6                | 0              | 0.372970                | -1.511805 | 2.366139  |
| 5                | 6                | 0              | -1.071261               | 1.205727  | -0.031558 |
| 6                | 6                | 0              | -1.281117               | 0.841427  | 2.615865  |
| 7                | 6                | 0              | 1.135772                | 1.233132  | 3.116145  |
| 8                | 6                | 0              | 0.099542                | -0.949176 | 3.785290  |
| 9                | 6                | 0              | -0.698567               | 2.679353  | 0.099223  |
| 10               | 6                | 0              | -0.155093               | 0.571987  | 3.632005  |
| 11               | 6                | 0              | -1.533408               | 3.574287  | 0.736645  |
| 12               | 6                | 0              | 0.503648                | 3.202478  | -0.482711 |
| 13               | 6                | 0              | -1.192200               | 4.943949  | 0.826397  |
| 14               | 6                | 0              | 0.757221                | 4.605539  | -0.317277 |
| 15               | 7                | 0              | -0.088708               | 5.449167  | 0.331308  |
| 16               | 1                | 0              | 1.711085                | 1.280642  | 0.983582  |
| 17               | 1                | 0              | 2.457897                | -0.031095 | 1.877844  |
| 18               | 1                | 0              | 1.312515                | -2.059530 | 2.308314  |

|    |   |   |           |           |           |
|----|---|---|-----------|-----------|-----------|
| 19 | 1 | 0 | -0.416376 | -2.176353 | 2.016745  |
| 20 | 1 | 0 | -0.453150 | 0.778763  | -0.818342 |
| 21 | 1 | 0 | -2.220484 | 0.402183  | 2.955814  |
| 22 | 1 | 0 | -1.435298 | 1.917420  | 2.557636  |
| 23 | 1 | 0 | 1.935815  | 1.127975  | 3.851698  |
| 24 | 1 | 0 | 0.973458  | 2.303137  | 2.968815  |
| 25 | 1 | 0 | 1.002401  | -1.068717 | 4.391117  |
| 26 | 1 | 0 | -0.429801 | 0.993142  | 4.600200  |
| 27 | 1 | 0 | -2.469119 | 3.260075  | 1.185404  |
| 28 | 6 | 0 | 1.448747  | 2.431128  | -1.197475 |
| 29 | 1 | 0 | -1.863253 | 5.631982  | 1.333260  |
| 30 | 6 | 0 | 1.945003  | 5.158074  | -0.856298 |
| 31 | 6 | 0 | -2.510865 | -2.296189 | -1.884899 |
| 32 | 6 | 0 | -2.225936 | -0.936772 | -1.660935 |
| 33 | 6 | 0 | -3.036038 | 0.009363  | -1.059399 |
| 34 | 7 | 0 | -2.478890 | 1.097110  | -0.444127 |
| 35 | 1 | 0 | -3.439722 | -2.719789 | -1.510778 |
| 36 | 1 | 0 | -1.194262 | -0.665965 | -1.848569 |
| 37 | 1 | 0 | -3.062563 | 1.909327  | -0.319021 |
| 38 | 6 | 0 | -1.555907 | -3.125977 | -2.437444 |
| 39 | 6 | 0 | -1.509550 | -4.505466 | -2.242077 |
| 40 | 6 | 0 | 2.862690  | 4.381339  | -1.517431 |
| 41 | 6 | 0 | 2.612023  | 2.997613  | -1.680742 |
| 42 | 1 | 0 | 2.102905  | 6.220231  | -0.718509 |
| 43 | 1 | 0 | 3.765726  | 4.831169  | -1.906493 |
| 44 | 8 | 0 | 3.489147  | 2.140406  | -2.289446 |
| 45 | 1 | 0 | 1.302046  | 1.375927  | -1.378450 |
| 46 | 6 | 0 | 4.596529  | 2.675561  | -3.028659 |
| 47 | 1 | 0 | 5.310951  | 3.173800  | -2.367950 |
| 48 | 1 | 0 | 5.074852  | 1.820056  | -3.500717 |
| 49 | 1 | 0 | 4.249282  | 3.368245  | -3.798839 |
| 50 | 6 | 0 | -4.509460 | -0.075481 | -1.014483 |
| 51 | 6 | 0 | -5.220772 | 0.336162  | 0.125796  |
| 52 | 6 | 0 | -5.225753 | -0.548338 | -2.125913 |
| 53 | 6 | 0 | -6.608082 | 0.262208  | 0.157275  |
| 54 | 1 | 0 | -4.682795 | 0.682928  | 1.000797  |
| 55 | 6 | 0 | -6.614130 | -0.616697 | -2.090930 |
| 56 | 1 | 0 | -4.691062 | -0.828831 | -3.024712 |
| 57 | 6 | 0 | -7.307762 | -0.213364 | -0.951364 |
| 58 | 1 | 0 | -7.144882 | 0.568615  | 1.047305  |
| 59 | 1 | 0 | -7.156209 | -0.972791 | -2.958806 |
| 60 | 1 | 0 | -8.389822 | -0.265495 | -0.927709 |
| 61 | 6 | 0 | -0.895256 | -2.298933 | 5.651362  |
| 62 | 1 | 0 | -1.729202 | -2.816531 | 6.110257  |

|    |   |   |           |           |           |
|----|---|---|-----------|-----------|-----------|
| 63 | 6 | 0 | -1.014193 | -1.693085 | 4.474291  |
| 64 | 1 | 0 | -1.971283 | -1.729378 | 3.955928  |
| 65 | 6 | 0 | -0.346005 | -5.260258 | -2.481636 |
| 66 | 1 | 0 | 0.262924  | -4.951312 | -3.333069 |
| 67 | 1 | 0 | -0.670611 | -2.660123 | -2.858068 |
| 68 | 1 | 0 | 0.041504  | -2.301454 | 6.200086  |
| 69 | 1 | 0 | -0.405437 | -6.336388 | -2.349190 |
| 70 | 1 | 0 | -2.343403 | -4.971720 | -1.718757 |
| 71 | 1 | 0 | -1.543068 | -0.586830 | 0.995037  |
| 72 | 1 | 0 | 0.490730  | -4.760185 | -1.596428 |
| 73 | 1 | 0 | 0.719403  | -0.902440 | 0.449431  |
| 74 | 8 | 0 | 0.767949  | -2.210243 | -0.556314 |
| 75 | 8 | 0 | 1.583981  | -4.262871 | -0.984859 |
| 76 | 6 | 0 | 1.705783  | -3.042147 | -0.644450 |
| 77 | 6 | 0 | 3.117291  | -2.631443 | -0.300194 |
| 78 | 6 | 0 | 3.626846  | -1.353584 | -0.599555 |
| 79 | 6 | 0 | 3.973689  | -3.568283 | 0.292733  |
| 80 | 6 | 0 | 4.951939  | -1.038844 | -0.281047 |
| 81 | 6 | 0 | 5.773542  | -1.979051 | 0.330750  |
| 82 | 6 | 0 | 5.284817  | -3.250633 | 0.624803  |
| 83 | 8 | 0 | 2.818011  | -0.438561 | -1.212495 |
| 84 | 1 | 0 | 5.335485  | -0.052981 | -0.525506 |
| 85 | 1 | 0 | 3.584726  | -4.562369 | 0.473474  |
| 86 | 1 | 0 | 5.924244  | -3.990352 | 1.090372  |
| 87 | 1 | 0 | 6.798339  | -1.718122 | 0.568840  |
| 88 | 1 | 0 | 3.338170  | 0.304953  | -1.558242 |

-----

**T-SA-TS-I**

Energy + zep (gas) = -2015.39725 au

Gibbs free energy (gas) = -2015.47788 au

Gibbs free energy (in solvent) = -2014.74060 au

Zero-point correction = 0.76496 au

Thermal correction to Gibbs free energy = 0.68433 au

Standard orientation:

-----

| Center<br>Number | Atomic<br>Number | Atomic<br>Type | Coordinates (Angstroms) |           |           |
|------------------|------------------|----------------|-------------------------|-----------|-----------|
|                  |                  |                | X                       | Y         | Z         |
| 1                | 1                | 0              | 4.781366                | 4.044125  | -2.713990 |
| 2                | 7                | 0              | -0.774590               | -0.395692 | 1.804483  |
| 3                | 6                | 0              | 0.556834                | -1.014327 | 1.375050  |
| 4                | 6                | 0              | -1.836403               | -1.422007 | 2.116396  |
| 5                | 6                | 0              | -0.527152               | 0.456953  | 3.034591  |

|    |   |   |           |           |           |
|----|---|---|-----------|-----------|-----------|
| 6  | 6 | 0 | 0.626799  | -1.456607 | -0.133179 |
| 7  | 6 | 0 | 0.945505  | -2.059435 | 2.442999  |
| 8  | 6 | 0 | -1.381718 | -2.261831 | 3.331568  |
| 9  | 6 | 0 | 0.073242  | -0.407317 | 4.178586  |
| 10 | 6 | 0 | 0.007000  | -2.804704 | -0.496466 |
| 11 | 6 | 0 | 0.065348  | -1.880918 | 3.694784  |
| 12 | 6 | 0 | 0.699657  | -3.979661 | -0.285671 |
| 13 | 6 | 0 | -1.287599 | -2.908906 | -1.105352 |
| 14 | 6 | 0 | 0.140573  | -5.225533 | -0.654396 |
| 15 | 6 | 0 | -1.761810 | -4.224816 | -1.425914 |
| 16 | 7 | 0 | -1.044361 | -5.357422 | -1.199389 |
| 17 | 1 | 0 | -1.981445 | -2.022499 | 1.223642  |
| 18 | 1 | 0 | -2.755720 | -0.866232 | 2.298240  |
| 19 | 1 | 0 | -1.487803 | 0.895208  | 3.305181  |
| 20 | 1 | 0 | 0.134410  | 1.261907  | 2.721864  |
| 21 | 1 | 0 | 0.122377  | -0.680532 | -0.718503 |
| 22 | 1 | 0 | 2.002401  | -1.950022 | 2.685054  |
| 23 | 1 | 0 | 0.806690  | -3.072774 | 2.065457  |
| 24 | 1 | 0 | -2.042319 | -2.090124 | 4.184397  |
| 25 | 1 | 0 | -1.441305 | -3.324052 | 3.087269  |
| 26 | 1 | 0 | -0.595118 | -0.343564 | 5.041635  |
| 27 | 1 | 0 | 0.430112  | -2.523602 | 4.497039  |
| 28 | 1 | 0 | 1.687931  | -3.974128 | 0.157777  |
| 29 | 6 | 0 | -2.128200 | -1.807447 | -1.392091 |
| 30 | 1 | 0 | 0.705578  | -6.137794 | -0.483191 |
| 31 | 6 | 0 | -3.044833 | -4.372884 | -2.007757 |
| 32 | 6 | 0 | 3.057859  | 2.148349  | -0.918276 |
| 33 | 6 | 0 | 2.289282  | 0.924012  | -0.793672 |
| 34 | 6 | 0 | 2.803194  | -0.332666 | -0.770675 |
| 35 | 7 | 0 | 2.051280  | -1.480014 | -0.461847 |
| 36 | 1 | 0 | 4.135605  | 2.072528  | -0.801590 |
| 37 | 1 | 0 | 1.218712  | 1.060666  | -0.683501 |
| 38 | 1 | 0 | 2.334865  | -2.288739 | -0.995480 |
| 39 | 6 | 0 | 2.524462  | 3.362912  | -1.140471 |
| 40 | 6 | 0 | 3.307097  | 4.627391  | -1.253306 |
| 41 | 6 | 0 | -3.854210 | -3.290975 | -2.245973 |
| 42 | 6 | 0 | -3.388791 | -1.995708 | -1.920687 |
| 43 | 1 | 0 | -3.366353 | -5.379082 | -2.245062 |
| 44 | 1 | 0 | -4.836001 | -3.437397 | -2.674951 |
| 45 | 8 | 0 | -4.154914 | -0.864000 | -2.071238 |
| 46 | 1 | 0 | -1.814076 | -0.790868 | -1.200970 |
| 47 | 6 | 0 | -5.330695 | -0.920691 | -2.892833 |
| 48 | 1 | 0 | -6.113674 | -1.523419 | -2.424977 |
| 49 | 1 | 0 | -5.671830 | 0.107894  | -2.990657 |

|    |   |   |           |           |           |
|----|---|---|-----------|-----------|-----------|
| 50 | 1 | 0 | -5.090323 | -1.317373 | -3.881618 |
| 51 | 6 | 0 | 4.049129  | 4.841990  | -2.551150 |
| 52 | 6 | 0 | 4.230555  | -0.654553 | -1.044743 |
| 53 | 6 | 0 | 4.952598  | -1.492967 | -0.182266 |
| 54 | 6 | 0 | 4.866886  | -0.161715 | -2.192720 |
| 55 | 6 | 0 | 6.281181  | -1.809274 | -0.448071 |
| 56 | 1 | 0 | 4.472737  | -1.880561 | 0.708817  |
| 57 | 6 | 0 | 6.194032  | -0.485161 | -2.460146 |
| 58 | 1 | 0 | 4.310973  | 0.460723  | -2.883351 |
| 59 | 6 | 0 | 6.905625  | -1.306179 | -1.587989 |
| 60 | 1 | 0 | 6.831051  | -2.445808 | 0.235662  |
| 61 | 1 | 0 | 6.670147  | -0.102042 | -3.355270 |
| 62 | 1 | 0 | 7.939218  | -1.555996 | -1.797095 |
| 63 | 6 | 0 | 1.738320  | 0.415629  | 5.863149  |
| 64 | 1 | 0 | 2.730076  | 0.760527  | 6.130310  |
| 65 | 6 | 0 | 1.429222  | 0.087946  | 4.612635  |
| 66 | 1 | 0 | 2.190300  | 0.179689  | 3.839546  |
| 67 | 6 | 0 | 3.320568  | 5.526540  | -0.267525 |
| 68 | 1 | 0 | 2.796179  | 5.358814  | 0.667597  |
| 69 | 1 | 0 | 1.451264  | 3.438370  | -1.318530 |
| 70 | 1 | 0 | 1.011710  | 0.350738  | 6.667388  |
| 71 | 1 | 0 | 3.869934  | 6.457614  | -0.355866 |
| 72 | 1 | 0 | 4.573074  | 5.799465  | -2.560412 |
| 73 | 1 | 0 | 3.360631  | 4.813296  | -3.402511 |
| 74 | 1 | 0 | 1.243703  | -0.169396 | 1.423423  |
| 75 | 1 | 0 | 0.253650  | 4.020815  | 0.325388  |
| 76 | 1 | 0 | -1.104161 | 0.264286  | 1.078418  |
| 77 | 8 | 0 | -0.814569 | 2.026440  | 0.473778  |
| 78 | 8 | 0 | -0.685391 | 4.234393  | 0.201148  |
| 79 | 6 | 0 | -1.383931 | 3.090739  | 0.265270  |
| 80 | 6 | 0 | -2.830986 | 3.285124  | 0.061294  |
| 81 | 6 | 0 | -3.702853 | 2.194307  | -0.147440 |
| 82 | 6 | 0 | -3.359389 | 4.589643  | 0.025768  |
| 83 | 6 | 0 | -5.059126 | 2.434837  | -0.387790 |
| 84 | 6 | 0 | -5.554729 | 3.730932  | -0.417954 |
| 85 | 6 | 0 | -4.704763 | 4.817541  | -0.205336 |
| 86 | 8 | 0 | -3.227661 | 0.919567  | -0.109569 |
| 87 | 1 | 0 | -5.724646 | 1.590685  | -0.532598 |
| 88 | 1 | 0 | -2.685799 | 5.421438  | 0.178393  |
| 89 | 1 | 0 | -5.090601 | 5.828670  | -0.224344 |
| 90 | 1 | 0 | -6.610557 | 3.893413  | -0.601133 |
| 91 | 1 | 0 | -3.785659 | 0.344453  | -0.666012 |

**SA-CH<sub>3</sub>-COM**

Energy + zep (gas) = -1823.67813 au

Gibbs free energy (gas) = -1823.75563 au

Gibbs free energy (in solvent) = -1823.08304 au

Zero-point correction = 0.71025 au

Thermal correction to Gibbs free energy = 0.63275 au

Standard orientation:

| Center<br>Number | Atomic<br>Number | Atomic<br>Type | Coordinates (Angstroms) |           |           |
|------------------|------------------|----------------|-------------------------|-----------|-----------|
|                  |                  |                | X                       | Y         | Z         |
| 1                | 7                | 0              | -0.581708               | -1.615580 | -0.342979 |
| 2                | 6                | 0              | 0.797500                | -1.790707 | 0.256024  |
| 3                | 6                | 0              | -0.532285               | -1.024314 | -1.728434 |
| 4                | 6                | 0              | -1.253392               | -2.967758 | -0.390201 |
| 5                | 6                | 0              | 1.446359                | -0.466920 | 0.731097  |
| 6                | 6                | 0              | 1.665089                | -2.556201 | -0.779270 |
| 7                | 6                | 0              | 0.159175                | -2.014414 | -2.691212 |
| 8                | 6                | 0              | -0.407950               | -3.968955 | -1.229611 |
| 9                | 6                | 0              | 2.880191                | -0.697612 | 1.204905  |
| 10               | 6                | 0              | 0.759074                | -3.166416 | -1.864858 |
| 11               | 6                | 0              | 3.123076                | -1.542891 | 2.265207  |
| 12               | 6                | 0              | 3.991760                | -0.035392 | 0.596470  |
| 13               | 6                | 0              | 4.441510                | -1.735424 | 2.736077  |
| 14               | 6                | 0              | 5.286196                | -0.305338 | 1.159131  |
| 15               | 7                | 0              | 5.486924                | -1.142420 | 2.210007  |
| 16               | 1                | 0              | -0.007921               | -0.071926 | -1.656982 |
| 17               | 1                | 0              | -1.565844               | -0.804616 | -1.987560 |
| 18               | 1                | 0              | -2.245318               | -2.790440 | -0.800519 |
| 19               | 1                | 0              | -1.376204               | -3.292333 | 0.643773  |
| 20               | 1                | 0              | 1.444306                | 0.236495  | -0.094041 |
| 21               | 1                | 0              | 2.253031                | -3.319336 | -0.270066 |
| 22               | 1                | 0              | 2.381828                | -1.878764 | -1.251280 |
| 23               | 1                | 0              | -0.555769               | -2.405403 | -3.418978 |
| 24               | 1                | 0              | 0.943119                | -1.505949 | -3.256663 |
| 25               | 1                | 0              | -1.029920               | -4.339362 | -2.049409 |
| 26               | 1                | 0              | 1.345679                | -3.826986 | -2.504749 |
| 27               | 1                | 0              | 2.319001                | -2.076791 | 2.762575  |
| 28               | 6                | 0              | 3.906246                | 0.847391  | -0.502927 |
| 29               | 1                | 0              | 4.624116                | -2.402106 | 3.574206  |
| 30               | 6                | 0              | 6.421238                | 0.328171  | 0.596941  |
| 31               | 6                | 0              | -0.876227               | 3.184892  | 0.592760  |
| 32               | 6                | 0              | 0.092176                | 2.237950  | 0.793343  |
| 33               | 6                | 0              | -0.008952               | 1.280333  | 1.841104  |



|    |   |   |           |           |           |
|----|---|---|-----------|-----------|-----------|
| 34 | 7 | 0 | 0.658231  | 0.133418  | 1.818856  |
| 35 | 1 | 0 | -1.759403 | 3.137046  | 1.217101  |
| 36 | 1 | 0 | 0.937654  | 2.189832  | 0.116476  |
| 37 | 1 | 0 | 0.573099  | -0.436107 | 2.650830  |
| 38 | 6 | 0 | -0.840257 | 4.169216  | -0.436115 |
| 39 | 6 | 0 | -1.864845 | 5.020793  | -0.722176 |
| 40 | 6 | 0 | 6.310899  | 1.184314  | -0.468651 |
| 41 | 6 | 0 | 5.035361  | 1.449171  | -1.031048 |
| 42 | 1 | 0 | 7.382553  | 0.107420  | 1.043489  |
| 43 | 1 | 0 | 7.198047  | 1.651456  | -0.873399 |
| 44 | 8 | 0 | 4.830102  | 2.276069  | -2.083259 |
| 45 | 1 | 0 | 2.965164  | 1.090465  | -0.978760 |
| 46 | 6 | 0 | 5.945366  | 2.939809  | -2.683409 |
| 47 | 1 | 0 | 6.661545  | 2.222138  | -3.094039 |
| 48 | 1 | 0 | 5.527920  | 3.534513  | -3.492843 |
| 49 | 1 | 0 | 6.445938  | 3.600517  | -1.969622 |
| 50 | 6 | 0 | -3.197072 | 5.008086  | -0.030698 |
| 51 | 6 | 0 | -0.841721 | 1.537041  | 3.051758  |
| 52 | 6 | 0 | -0.211098 | -6.425286 | -0.753724 |
| 53 | 1 | 0 | 0.138259  | -7.250673 | -0.144959 |
| 54 | 6 | 0 | 0.041354  | -5.162034 | -0.426406 |
| 55 | 1 | 0 | 0.606647  | -4.959552 | 0.482441  |
| 56 | 6 | 0 | -1.701732 | 6.057220  | -1.792651 |
| 57 | 1 | 0 | -0.696117 | 6.070980  | -2.213722 |
| 58 | 1 | 0 | -2.419614 | 5.882119  | -2.602083 |
| 59 | 1 | 0 | 0.070868  | 4.246955  | -1.024367 |
| 60 | 1 | 0 | -0.778197 | -6.681959 | -1.643267 |
| 61 | 1 | 0 | -1.929729 | 7.052059  | -1.394111 |
| 62 | 1 | 0 | -3.995030 | 5.134857  | -0.768443 |
| 63 | 1 | 0 | -3.268282 | 5.869018  | 0.645272  |
| 64 | 1 | 0 | -0.515143 | 2.452080  | 3.549841  |
| 65 | 1 | 0 | -0.798957 | 0.705599  | 3.756801  |
| 66 | 1 | 0 | -1.258569 | -0.984799 | 0.221926  |
| 67 | 1 | 0 | -3.400579 | 4.098212  | 0.531964  |
| 68 | 1 | 0 | 0.636165  | -2.416609 | 1.137162  |
| 69 | 1 | 0 | -1.883725 | 1.661877  | 2.721651  |
| 70 | 6 | 0 | -4.720883 | -0.044239 | 0.435988  |
| 71 | 6 | 0 | -5.861289 | 0.307550  | 1.171608  |
| 72 | 6 | 0 | -7.124715 | -0.175108 | 0.856664  |
| 73 | 6 | 0 | -7.278756 | -1.016188 | -0.242267 |
| 74 | 6 | 0 | -4.900438 | -0.886445 | -0.670130 |
| 75 | 6 | 0 | -6.169386 | -1.363271 | -1.003794 |
| 76 | 6 | 0 | -3.398690 | 0.538085  | 0.899811  |
| 77 | 1 | 0 | -5.722543 | 0.986316  | 2.003196  |

|    |   |   |           |           |           |
|----|---|---|-----------|-----------|-----------|
| 78 | 8 | 0 | -3.820720 | -1.233327 | -1.467370 |
| 79 | 1 | 0 | -6.286663 | -2.009406 | -1.870090 |
| 80 | 1 | 0 | -8.255898 | -1.398561 | -0.513086 |
| 81 | 1 | 0 | -7.981657 | 0.108300  | 1.455506  |
| 82 | 8 | 0 | -3.439649 | 1.674471  | 1.408942  |
| 83 | 8 | 0 | -2.340364 | -0.173405 | 0.813698  |
| 84 | 1 | 0 | -4.180236 | -1.635619 | -2.266305 |

-----

**SA-CH<sub>3</sub>-TSA**

Energy + zep (gas) = -1823.64533 au

Gibbs free energy (gas) = -1823.71993 au

Gibbs free energy (in solvent) = -1823.07042 au

Zero-point correction = 0.70590 au

Thermal correction to Gibbs free energy = 0.63130 au

Standard orientation:

-----

| Center<br>Number | Atomic<br>Number | Atomic<br>Type | Coordinates (Angstroms) |           |           |
|------------------|------------------|----------------|-------------------------|-----------|-----------|
|                  |                  |                | X                       | Y         | Z         |
| 1                | 1                | 0              | 4.526968                | -0.605877 | -1.154977 |
| 2                | 7                | 0              | -0.166639               | -1.042454 | 1.238814  |
| 3                | 6                | 0              | -0.994560               | -1.908655 | 0.299597  |
| 4                | 6                | 0              | -1.001930               | -0.106871 | 2.071127  |
| 5                | 6                | 0              | 0.622011                | -1.953461 | 2.157473  |
| 6                | 6                | 0              | -1.461726               | -1.163045 | -1.022149 |
| 7                | 6                | 0              | -2.071602               | -2.630385 | 1.144315  |
| 8                | 6                | 0              | -1.948682               | -0.936775 | 2.971165  |
| 9                | 6                | 0              | -0.329484               | -2.852014 | 2.994076  |
| 10               | 6                | 0              | -2.849608               | -0.529314 | -1.031967 |
| 11               | 6                | 0              | -1.780455               | -2.431922 | 2.644521  |
| 12               | 6                | 0              | -3.977416               | -1.297825 | -1.224308 |
| 13               | 6                | 0              | -3.034360               | 0.883760  | -0.883881 |
| 14               | 6                | 0              | -5.260866               | -0.705017 | -1.242486 |
| 15               | 6                | 0              | -4.382121               | 1.376302  | -0.899308 |
| 16               | 7                | 0              | -5.468672               | 0.579160  | -1.075658 |
| 17               | 1                | 0              | -1.536766               | 0.552108  | 1.393411  |
| 18               | 1                | 0              | -0.303259               | 0.503475  | 2.641821  |
| 19               | 1                | 0              | 1.234169                | -1.301909 | 2.780387  |
| 20               | 1                | 0              | 1.296109                | -2.524105 | 1.520257  |
| 21               | 1                | 0              | -0.721718               | -0.388869 | -1.195954 |
| 22               | 1                | 0              | -2.094803               | -3.691217 | 0.886925  |
| 23               | 1                | 0              | -3.061742               | -2.226624 | 0.932173  |
| 24               | 1                | 0              | -1.727370               | -0.755556 | 4.025206  |

|    |   |   |           |           |           |
|----|---|---|-----------|-----------|-----------|
| 25 | 1 | 0 | -2.983834 | -0.632119 | 2.803699  |
| 26 | 1 | 0 | -0.172970 | -2.629272 | 4.052982  |
| 27 | 1 | 0 | -2.480531 | -3.025005 | 3.234548  |
| 28 | 1 | 0 | -3.916565 | -2.371005 | -1.366893 |
| 29 | 6 | 0 | -1.981397 | 1.814200  | -0.725265 |
| 30 | 1 | 0 | -6.138014 | -1.327835 | -1.395246 |
| 31 | 6 | 0 | -4.607748 | 2.764403  | -0.728918 |
| 32 | 6 | 0 | 2.067972  | -1.282942 | -3.278876 |
| 33 | 6 | 0 | 0.675571  | -1.187076 | -3.080428 |
| 34 | 6 | 0 | -0.149905 | -2.261636 | -2.842216 |
| 35 | 7 | 0 | -1.315941 | -2.113749 | -2.136314 |
| 36 | 1 | 0 | 2.522567  | -2.265913 | -3.199740 |
| 37 | 1 | 0 | 0.281036  | -0.190796 | -2.915712 |
| 38 | 1 | 0 | -1.915014 | -2.925594 | -2.101872 |
| 39 | 6 | 0 | 2.904066  | -0.202074 | -3.434902 |
| 40 | 6 | 0 | 4.289274  | -0.225061 | -3.140942 |
| 41 | 6 | 0 | -3.570522 | 3.643086  | -0.540909 |
| 42 | 6 | 0 | -2.240836 | 3.157109  | -0.534305 |
| 43 | 1 | 0 | -5.635471 | 3.104420  | -0.748422 |
| 44 | 1 | 0 | -3.777211 | 4.695468  | -0.403387 |
| 45 | 8 | 0 | -1.148348 | 3.957474  | -0.323046 |
| 46 | 1 | 0 | -0.945685 | 1.506649  | -0.740500 |
| 47 | 6 | 0 | -1.308721 | 5.382669  | -0.339678 |
| 48 | 1 | 0 | -1.910203 | 5.724319  | 0.506984  |
| 49 | 1 | 0 | -0.304105 | 5.792625  | -0.259016 |
| 50 | 1 | 0 | -1.760144 | 5.711668  | -1.278660 |
| 51 | 6 | 0 | 4.863135  | -1.192337 | -2.290531 |
| 52 | 6 | 0 | 0.225407  | -5.174042 | 3.767684  |
| 53 | 1 | 0 | 0.412529  | -6.222731 | 3.569742  |
| 54 | 6 | 0 | -0.052437 | -4.318684 | 2.789099  |
| 55 | 1 | 0 | -0.081867 | -4.683203 | 1.763320  |
| 56 | 6 | 0 | 5.130549  | 0.942704  | -3.568904 |
| 57 | 1 | 0 | 5.622380  | 0.692310  | -4.516742 |
| 58 | 1 | 0 | 4.533106  | 1.840085  | -3.737443 |
| 59 | 1 | 0 | 2.464195  | 0.759427  | -3.684053 |
| 60 | 1 | 0 | 0.277348  | -4.857091 | 4.804803  |
| 61 | 1 | 0 | 5.914153  | 1.161458  | -2.842079 |
| 62 | 1 | 0 | 5.948423  | -1.260776 | -2.275282 |
| 63 | 1 | 0 | 4.347500  | -2.142481 | -2.162507 |
| 64 | 6 | 0 | 0.135305  | -3.658697 | -3.317858 |
| 65 | 1 | 0 | 0.989412  | -3.691856 | -3.990382 |
| 66 | 1 | 0 | 0.310884  | -4.340811 | -2.478923 |
| 67 | 1 | 0 | -0.728385 | -4.040190 | -3.873193 |
| 68 | 1 | 0 | -0.260521 | -2.629928 | -0.058808 |

|    |   |   |          |           |           |
|----|---|---|----------|-----------|-----------|
| 69 | 1 | 0 | 0.598510 | -0.535865 | 0.688529  |
| 70 | 8 | 0 | 2.063848 | -0.401334 | -0.035640 |
| 71 | 8 | 0 | 4.259631 | 0.076488  | -0.041856 |
| 72 | 6 | 0 | 3.065196 | 0.241468  | 0.365439  |
| 73 | 6 | 0 | 2.917795 | 1.291457  | 1.440537  |
| 74 | 6 | 0 | 1.852865 | 2.209717  | 1.448478  |
| 75 | 6 | 0 | 3.895944 | 1.393994  | 2.436570  |
| 76 | 6 | 0 | 1.773651 | 3.180838  | 2.450827  |
| 77 | 6 | 0 | 2.743798 | 3.245277  | 3.445735  |
| 78 | 6 | 0 | 3.809013 | 2.346924  | 3.444917  |
| 79 | 8 | 0 | 0.914936 | 2.138311  | 0.456379  |
| 80 | 1 | 0 | 0.951835 | 3.890321  | 2.440118  |
| 81 | 1 | 0 | 4.737334 | 0.713663  | 2.393523  |
| 82 | 1 | 0 | 4.572600 | 2.400851  | 4.210981  |
| 83 | 1 | 0 | 2.669303 | 4.004495  | 4.215709  |
| 84 | 1 | 0 | 0.380971 | 2.948633  | 0.417717  |

-----

**SA-CH<sub>3</sub>-TSB**

Energy + zep (gas) = -1823.67221 au

Gibbs free energy (gas) = -1823.74977 au

Gibbs free energy (in solvent) = -1823.04827 au

Zero-point correction = 0.70614 au

Thermal correction to Gibbs free energy = 0.62858 au

Standard orientation:

-----

| Center<br>Number | Atomic<br>Number | Atomic<br>Type | Coordinates (Angstroms) |           |           |
|------------------|------------------|----------------|-------------------------|-----------|-----------|
|                  |                  |                | X                       | Y         | Z         |
| 1                | 7                | 0              | -0.660104               | -1.808209 | -0.180514 |
| 2                | 6                | 0              | 0.747731                | -1.912427 | 0.367194  |
| 3                | 6                | 0              | -0.710117               | -1.194632 | -1.557915 |
| 4                | 6                | 0              | -1.273772               | -3.187955 | -0.223017 |
| 5                | 6                | 0              | 1.302655                | -0.548259 | 0.841694  |
| 6                | 6                | 0              | 1.613500                | -2.630151 | -0.700084 |
| 7                | 6                | 0              | 0.026936                | -2.116129 | -2.554897 |
| 8                | 6                | 0              | -0.414446               | -4.125774 | -1.120192 |
| 9                | 6                | 0              | 2.752462                | -0.696651 | 1.304964  |
| 10               | 6                | 0              | 0.698264                | -3.257508 | -1.769904 |
| 11               | 6                | 0              | 3.035027                | -1.399073 | 2.455038  |
| 12               | 6                | 0              | 3.841711                | -0.115018 | 0.583190  |
| 13               | 6                | 0              | 4.369623                | -1.534114 | 2.899372  |
| 14               | 6                | 0              | 5.155188                | -0.311825 | 1.130280  |
| 15               | 7                | 0              | 5.395771                | -1.014262 | 2.268120  |

|    |   |   |           |           |           |
|----|---|---|-----------|-----------|-----------|
| 16 | 1 | 0 | -0.265870 | -0.202319 | -1.489199 |
| 17 | 1 | 0 | -1.768560 | -1.066852 | -1.779908 |
| 18 | 1 | 0 | -2.292920 | -3.050992 | -0.580398 |
| 19 | 1 | 0 | -1.330184 | -3.539170 | 0.807874  |
| 20 | 1 | 0 | 1.258995  | 0.152460  | 0.012564  |
| 21 | 1 | 0 | 2.240087  | -3.379670 | -0.217237 |
| 22 | 1 | 0 | 2.293261  | -1.923275 | -1.181793 |
| 23 | 1 | 0 | -0.673210 | -2.522289 | -3.288404 |
| 24 | 1 | 0 | 0.777016  | -1.548765 | -3.109820 |
| 25 | 1 | 0 | -1.047110 | -4.500805 | -1.929436 |
| 26 | 1 | 0 | 1.291688  | -3.878941 | -2.441752 |
| 27 | 1 | 0 | 2.248850  | -1.853049 | 3.049683  |
| 28 | 6 | 0 | 3.714510  | 0.629594  | -0.611751 |
| 29 | 1 | 0 | 4.582458  | -2.090344 | 3.808089  |
| 30 | 6 | 0 | 6.267108  | 0.251419  | 0.457751  |
| 31 | 6 | 0 | -0.465347 | 3.288505  | 0.685003  |
| 32 | 6 | 0 | 0.335282  | 2.257307  | 1.059844  |
| 33 | 6 | 0 | -0.091504 | 1.230757  | 1.990968  |
| 34 | 7 | 0 | 0.443237  | -0.006228 | 1.897482  |
| 35 | 1 | 0 | -1.483741 | 3.300848  | 1.056738  |
| 36 | 1 | 0 | 1.343643  | 2.196036  | 0.663823  |
| 37 | 1 | 0 | 0.215937  | -0.634107 | 2.656299  |
| 38 | 6 | 0 | -0.056438 | 4.346669  | -0.194136 |
| 39 | 6 | 0 | -0.834066 | 5.373806  | -0.617344 |
| 40 | 6 | 0 | 6.116757  | 0.974219  | -0.698102 |
| 41 | 6 | 0 | 4.821720  | 1.168287  | -1.244021 |
| 42 | 1 | 0 | 7.243991  | 0.087953  | 0.895176  |
| 43 | 1 | 0 | 6.987276  | 1.391881  | -1.184717 |
| 44 | 8 | 0 | 4.576453  | 1.866797  | -2.379080 |
| 45 | 1 | 0 | 2.755817  | 0.812475  | -1.079463 |
| 46 | 6 | 0 | 5.668740  | 2.450028  | -3.093206 |
| 47 | 1 | 0 | 6.371362  | 1.686264  | -3.439262 |
| 48 | 1 | 0 | 5.222705  | 2.944526  | -3.953341 |
| 49 | 1 | 0 | 6.194042  | 3.190039  | -2.482247 |
| 50 | 6 | 0 | -2.279195 | 5.562870  | -0.253577 |
| 51 | 6 | 0 | -1.115116 | 1.458315  | 2.943643  |
| 52 | 6 | 0 | -0.107088 | -6.582201 | -0.708773 |
| 53 | 1 | 0 | 0.299336  | -7.406326 | -0.134772 |
| 54 | 6 | 0 | 0.112851  | -5.317669 | -0.363790 |
| 55 | 1 | 0 | 0.710911  | -5.111269 | 0.522809  |
| 56 | 6 | 0 | -0.260858 | 6.436907  | -1.510065 |
| 57 | 1 | 0 | 0.790012  | 6.260787  | -1.742087 |
| 58 | 1 | 0 | -0.821352 | 6.494115  | -2.449952 |
| 59 | 1 | 0 | 0.976878  | 4.320643  | -0.531861 |

|    |   |   |           |           |           |
|----|---|---|-----------|-----------|-----------|
| 60 | 1 | 0 | -0.702626 | -6.841299 | -1.578834 |
| 61 | 1 | 0 | -0.350978 | 7.421873  | -1.038259 |
| 62 | 1 | 0 | -2.881152 | 5.665579  | -1.162677 |
| 63 | 1 | 0 | -2.404011 | 6.497715  | 0.304161  |
| 64 | 1 | 0 | -1.157060 | 2.462196  | 3.354226  |
| 65 | 1 | 0 | -1.247439 | 0.681128  | 3.695069  |
| 66 | 1 | 0 | -1.303893 | -1.227465 | 0.424627  |
| 67 | 1 | 0 | -2.701560 | 4.753347  | 0.338859  |
| 68 | 1 | 0 | 0.649907  | -2.550764 | 1.249670  |
| 69 | 1 | 0 | -2.240721 | 1.372457  | 2.222750  |
| 70 | 6 | 0 | -4.905629 | 0.097776  | 0.339762  |
| 71 | 6 | 0 | -5.967325 | 0.855386  | 0.856240  |
| 72 | 6 | 0 | -7.258747 | 0.744457  | 0.361627  |
| 73 | 6 | 0 | -7.510217 | -0.131818 | -0.691586 |
| 74 | 6 | 0 | -5.175892 | -0.777018 | -0.728803 |
| 75 | 6 | 0 | -6.473412 | -0.879965 | -1.234908 |
| 76 | 6 | 0 | -3.552648 | 0.252344  | 0.968525  |
| 77 | 1 | 0 | -5.744957 | 1.535757  | 1.667464  |
| 78 | 8 | 0 | -4.164449 | -1.509013 | -1.309702 |
| 79 | 1 | 0 | -6.669335 | -1.554863 | -2.063869 |
| 80 | 1 | 0 | -8.510431 | -0.233426 | -1.096117 |
| 81 | 1 | 0 | -8.060177 | 1.333103  | 0.790212  |
| 82 | 8 | 0 | -3.358013 | 1.359702  | 1.584648  |
| 83 | 8 | 0 | -2.712676 | -0.670851 | 0.902071  |
| 84 | 1 | 0 | -4.549231 | -1.980138 | -2.057933 |

---
